# Supplementary material for: LOXL2 Expression Status Is Correlated With Molecular Characterizations of Cervical Carcinoma and Associated With Poor Cancer Survival via Epithelial-Mesenchymal Transition (EMT) Phenotype
Source: Front Oncol. 2020 Mar 6;10:284. doi: 10.3389/fonc.2020.00284 (PMC7067748; doi:10.3389/fonc.2020.00284)
Supplement: Supplementary file 2 [file Table_1.xls]

## Sheet: Table1_v1
Supplementary Tables
Supplementary Table 1: Information of 176 samples.
Supplementary Table 3: Primers of target genes.
Supplementary Table 4: CpG islands and expression of LOXL2.
Supplementary Table 5: Survival data of 176 samples.
Supplementary Table 6: Somatic mutation details of 176 samples.
Supplementary Table 7: Correlated genes of LOXL2 in cervical crcinoma.
Supplementary Table 8: Metascape annotation of LOXL2 positive correlated genes.
Supplementary Table 9: Metascape enrichment of LOXL2 positive correlated genes.

## Sheet: Table S1
TCGA barcode	LOXL2 expression (FPKM)	CLIN:age_at_initial_pathologic_diagnosis	CLIN:Hys_LVSI_LN	CLIN:Dx_merged	CLIN:HPV_status	CLIN:HPV_clade_4	CLIN:HPV_int1	CLIN:clinStage	CLIN:UCEC-like	CLIN:e6_cat_k4	SAMP:MutSig_rateNon_perMb	SAMP:MutSig_rateSil_perMb	SAMP:MutSig_rateTot_perMb	SAMP:hyperMut	SAMP:mRNAseq_k3	SAMP:miRNA_k6	SAMP:RPPA_k3	SAMP:CIMP_call	SAMP:CN_cluster	GEXP:APOBEC1:339	GEXP:APOBEC3A:200315	GEXP:APOBEC3B:9582	GEXP:APOBEC3C:27350	GEXP:APOBEC3D:140564	GEXP:APOBEC3F:200316	GEXP:APOBEC3G:60489	GEXP:APOBEC3H:164668
TCGA-EK-A2RN-01A	0.4	45.13	LVSI_LNneg	Squamous	positive	A9	No	I	No	C2	3.282	1.112	4.756	FALSE	C2	C2	NA	CIMP-low	CN_high	0.001	7.484	7.493	7.233	5.024	6.062	8.498	3.662
TCGA-EK-A2RA-01A	0.5	74.5	NA	Squamous	positive	A9	Yes	II	No	NA	4.672	1.724	6.869	FALSE	C2	C3	Hormone	CIMP-intermediate	CN_high	0.004	10.157	10.338	9.136	7.89	8.347	10.145	5.411
TCGA-EK-A2PG-01A	0.5	88.98	NA	Squamous	positive	A9	Yes	NA	No	NA	12.487	4.144	17.688	TRUE	C2	C3	NA	CIMP-intermediate	CN_high	0.007	7.34	9.4	7.148	3.604	5.849	6.298	2.516
TCGA-EK-A2RK-01A	0.6	67.19	NA	Squamous	positive	A9	Yes	I	No	C1	5.145	1.418	7.314	FALSE	C2	C1	PI3K_AKT	CIMP-low	CN_high	0.01	11.183	10.417	9.216	5.251	8.507	8.162	3.574
TCGA-EK-A2RB-01A	0.8	48.6	NA	Squamous	positive	A9	Yes	III_IV	No	C3	2.614	0.918	3.782	FALSE	C2	C2	NA	CIMP-intermediate	CN_low	0.01	10.239	11.026	8.488	7.887	7.691	8.58	3.769
TCGA-EX-A69M-01A	0.8	62.74	NA	Squamous	positive	A9	Yes	I	No	NA	1.168	0.445	1.808	FALSE	C3	C3	Hormone	CIMP-intermediate	CN_low	0.528	5.734	7.196	8.259	7.827	8.584	9.744	5.132
TCGA-LP-A5U3-01A	1	40.24	NA	Squamous	positive	A9	Yes	I	No	C4	1.057	0.389	1.502	FALSE	C2	C3	PI3K_AKT	CIMP-intermediate	CN_high	0.004	9.335	9.927	9.482	6.839	6.988	9.156	4.529
TCGA-DR-A0ZL-01A	1	53.07	NA	Squamous	positive	A9	No	I	No	C3	1.224	0.389	1.669	FALSE	C2	C1	NA	CIMP-intermediate	CN_high	0.004	6.546	10.306	8.736	5.886	7.293	6.983	3.047
TCGA-C5-A7UE-01A	1.1	45.1	NA	Squamous	positive	A9	Yes	I	No	C4	3.087	1	4.283	FALSE	C2	C3	NA	CIMP-intermediate	CN_low	0.001	11.064	10.611	7.775	7.114	7.789	8.016	2.828
TCGA-IR-A3LI-01A	1.1	48.57	LVSI_LNpos	Adenocarcinoma	positive	A9	Yes	III_IV	No	C1	7.259	3.254	11.236	FALSE	C1	C5	Hormone	CIMP-high	CN_low	1.948	8.176	10.899	8.097	7.961	9.422	9.66	6.486
TCGA-JW-A5VJ-01A	1.1	56.71	NA	Squamous	positive	A7	Yes	II	No	C2	4.172	1.307	5.701	FALSE	C2	C2	NA	CIMP-low	CN_low	0.009	7.755	8.639	8.571	5.999	6.388	7.055	2.212
TCGA-IR-A3LL-01A	1.1	60.57	LVSI_LNneg	Squamous	positive	A9	No	I	No	C1	8.288	3.004	12.015	FALSE	C2	C3	PI3K_AKT	CIMP-intermediate	CN_high	0	13.986	11.463	9.071	8.959	8.369	10.144	6.007
TCGA-DG-A2KH-01A	1.2	25.21	NA	Adenocarcinoma	positive	A7	Yes	I	No	C3	1.502	0.306	1.975	FALSE	C1	C5	Hormone	CIMP-low	CN_low	6.152	5.622	10.499	8.274	7.745	7.562	7.614	1.53
TCGA-LP-A5U2-01A	1.2	30.25	NA	Adenocarcinoma	positive	A9	Yes	III_IV	No	C1	5.117	1.252	6.758	FALSE	C3	C6	Hormone	CIMP-intermediate	CN_high	0.001	6.97	12.084	7.814	5.518	8.594	8.325	3.717
TCGA-C5-A2LY-01A	1.2	30.17	NA	Squamous	positive	A9	Yes	I	No	C4	0.083	0	0.083	FALSE	C2	C4	EMT	CIMP-low	CN_high	0.003	8.063	9.713	8.129	7.697	8.799	9.64	5.914
TCGA-C5-A1BL-01A	1.2	32.1	NA	Squamous	positive	A9	Yes	I	No	C3	3.977	1.446	5.646	FALSE	C2	C4	PI3K_AKT	CIMP-intermediate	CN_high	0.006	10.4	8.943	8.884	7.037	7.372	8.859	4.108
TCGA-EA-A3HR-01A	1.2	57.44	NA	Squamous	positive	other	Yes	II	No	NA	1.502	0.667	2.475	FALSE	C2	C2	Hormone	CIMP-low	CN_low	0.013	10.078	10.037	10.069	7.068	7.187	8.383	4.521
TCGA-DS-A0VL-01A	1.3	25.15	LVSI_LNneg	Squamous	positive	A9	Yes	I	No	C4	1.051	0.274	1.645	FALSE	C2	C1	EMT	CIMP-intermediate	CN_high	0.006	9.122	10.536	9.216	6.998	7.864	9.111	2.775
TCGA-EK-A3GJ-01A	1.3	51.01	NA	Squamous	positive	A9	Yes	I	No	NA	5.006	2.03	7.453	FALSE	C2	C4	NA	CIMP-intermediate	CN_high	0.011	12.616	11.466	9.234	8.405	8.616	9.781	5.053
TCGA-FU-A3EO-01A	1.3	55.32	NA	Adenocarcinoma	positive	A9	No	II	No	C1	1.224	0.417	1.836	FALSE	C1	C5	NA	CIMP-high	CN_low	5.647	5.647	9.73	7.746	8.449	8.457	8.253	2.661
TCGA-DR-A0ZM-01A	1.3	61.5	LVSI_LNneg	Squamous	negative	negative	No	III_IV	No	NA	28.09	8.455	38.102	TRUE	C2	C1	NA	CIMP-low	CN_low	0.014	12.21	8.914	9.284	8.422	8.496	10.626	5.981
TCGA-EA-A44S-01A	1.4	31.82	NA	Squamous	positive	A9	Yes	III_IV	No	C1	0.946	0.334	1.585	FALSE	C2	C2	PI3K_AKT	CIMP-low	CN_high	0	10.979	11.12	7.982	6.383	7.245	8.563	3.89
TCGA-EX-A1H6-01B	1.4	38.92	NA	Adenocarcinoma	positive	A9	Yes	I	No	C1	1.863	0.584	2.698	FALSE	C1	C5	NA	CIMP-high	CN_low	4.246	6.845	9.355	7.376	8.42	8.604	9.366	4.868
TCGA-FU-A23L-01A	1.4	60.13	NA	Squamous	positive	A7	Yes	II	No	NA	3.337	0.612	4.2	FALSE	C3	C1	Hormone	CIMP-low	CN_high	0.865	9.992	10.612	9.52	8.581	8.605	9.883	6.909
TCGA-IR-A3LK-01A	1.4	69.65	NA	Squamous	positive	A9	Yes	I	No	NA	29.953	9.289	42.44	TRUE	C3	C3	Hormone	CIMP-intermediate	CN_high	0.007	10.701	10.017	8.012	6.991	6.549	8.492	3.663
TCGA-C5-A1BK-01B	1.6	36.41	NA	Squamous	positive	A9	Yes	I	No	C2	3.615	1.196	5.145	FALSE	C2	C1	NA	CIMP-intermediate	CN_high	0.009	8.319	9.803	8.998	7.715	8.127	10.116	6.288
TCGA-EK-A2PL-01A	1.6	36.64	NA	Squamous	positive	A7	Yes	III_IV	No	NA	3.894	0.946	5.451	FALSE	C2	C4	PI3K_AKT	CIMP-low	CN_low	0	10.874	7.62	7.834	5.908	7.191	8.424	3.913
TCGA-C5-A1ME-01A	1.6	40.99	NA	Adenocarcinoma	positive	A7	Yes	I	No	C2	1.112	0.362	1.613	FALSE	C1	C5	Hormone	CIMP-high	CN_low	5.572	5.86	9.418	7.246	7.607	7.956	8.457	3.131
TCGA-EA-A1QT-01A	1.6	47.84	NA	Squamous	positive	A9	Yes	I	No	C2	1.641	0.417	2.114	FALSE	C2	C1	PI3K_AKT	CIMP-intermediate	CN_high	0.009	9.524	10.562	8.493	5.863	6.666	7.197	2.493
TCGA-JX-A3Q0-01A	1.6	63.83	NA	Squamous	positive	A9	Yes	III_IV	No	NA	15.408	5.59	22.583	TRUE	C2	C4	PI3K_AKT	CIMP-low	CN_low	0.004	10.994	9.311	9.192	6.585	7.62	8.81	4.249
TCGA-IR-A3L7-01A	1.7	37.12	LVSI_LNneg	Squamous	positive	A7	Yes	I	No	C3	0.556	0.25	1.085	FALSE	C2	C1	Hormone	CIMP-intermediate	CN_low	0	5.3	9.374	9.63	8.118	8.815	8.88	2.751
TCGA-C5-A1BM-01A	1.7	78.89	LVSI_LNpos	Squamous	positive	A7	Yes	I	No	C1	3.087	0.834	4.06	FALSE	C2	C2	NA	CIMP-low	CN_low	0.01	11.256	10.012	9.218	6.916	7.996	9.591	4.289
TCGA-Q1-A6DV-01A	1.8	36.05	NA	Adenocarcinoma	positive	A9	Yes	I	No	C4	0.862	0.362	1.307	FALSE	C1	C5	NA	CIMP-intermediate	CN_low	0.013	5.342	8.939	7.548	4.223	8.34	8.782	2.886
TCGA-Q1-A73Q-01A	1.8	46.14	NA	Squamous	positive	A9	Yes	I	No	NA	1.696	0.584	2.559	FALSE	C2	C4	EMT	CIMP-intermediate	CN_low	0.01	6.045	8.957	8.306	6.082	7.095	8.455	1.855
TCGA-C5-A7CG-01A	1.8	55.42	NA	Squamous	positive	A9	Yes	I	No	NA	1.224	0.362	1.78	FALSE	C2	C5	Hormone	CIMP-high	CN_high	0.003	10.534	9.141	9.968	9.443	9.561	10.832	6.09
TCGA-Q1-A5R2-01A	1.8	64.4	NA	Squamous	positive	A9	Yes	NA	No	C1	6.035	2.42	9.067	FALSE	C2	C3	NA	CIMP-intermediate	CN_high	0.006	9.912	10.11	8.422	7.827	8.249	9.628	5.06
TCGA-C5-A2LZ-01A	1.8	65.87	NA	Squamous	positive	A9	No	III_IV	No	C2	8.872	3.143	12.738	FALSE	C2	C2	PI3K_AKT	CIMP-intermediate	CN_high	0.434	8.186	10.346	8.974	7.362	7.82	8.842	4.114
TCGA-EK-A2PM-01A	1.8	81.44	NA	Squamous	negative	negative	No	II	No	NA	6.786	2.086	9.456	FALSE	C2	C4	Hormone	CIMP-low	CN_high	0.004	6.48	9.225	7.509	2.758	5.279	3.423	0.783
TCGA-EA-A5O9-01A	1.9	39.62	NA	Squamous	positive	A9	No	I	No	C1	1.196	0.362	1.724	FALSE	C2	C2	PI3K_AKT	CIMP-intermediate	CN_high	0.013	9.461	10.364	8.224	6.937	7.902	8.724	3.747
TCGA-C5-A1BE-01B	1.9	64.96	LVSI_LNpos	Squamous	positive	A9	Yes	I	No	C2	1.502	0.584	2.364	FALSE	C2	C1	NA	CIMP-low	CN_high	0.014	10.101	9.864	9.216	7.595	8.012	8.756	3.018
TCGA-C5-A3HL-01A	1.9	76.56	NA	Squamous	positive	A9	No	I	No	C3	2.197	1.085	3.782	FALSE	C2	C3	NA	CIMP-low	CN_high	0.003	7.918	9.793	9.154	4.548	7.238	8.549	2.453
TCGA-Q1-A5R1-01A	2	32.05	NA	Adenocarcinoma	positive	A9	No	I	No	C4	1.168	0.362	1.696	FALSE	C1	C5	NA	CIMP-high	CN_low	2.433	5.627	10.344	7.665	7.034	8.087	7.766	2.972
TCGA-C5-A2LS-01A	2	37.94	NA	Adenocarcinoma	positive	A9	Yes	I	No	C3	1.057	0.751	1.919	FALSE	C1	C5	NA	CIMP-high	CN_low	4.326	5.424	10.744	7.52	7.632	8.07	7.684	2.878
TCGA-JX-A5QV-01A	2	37.42	NA	Squamous	positive	A9	Yes	I	No	C1	0.89	0.389	1.335	FALSE	C2	C2	Hormone	CIMP-low	CN_high	0.007	7.869	8.2	8.226	6.225	7.353	8.024	3.322
TCGA-HM-A4S6-01A	2	51.75	LVSI_LNpos	Squamous	positive	A9	No	III_IV	No	C2	1.029	0.278	1.335	FALSE	C2	C3	PI3K_AKT	CIMP-low	CN_high	0.009	9.403	10.809	10.168	6.585	7.606	9.296	4.776
TCGA-C5-A1BQ-01C	2	65.76	NA	Squamous	positive	A9	No	III_IV	No	NA	17.438	6.619	26.059	TRUE	C2	C3	NA	CIMP-intermediate	CN_high	0.013	11.182	10.215	9.873	7.363	8.051	9.34	4.895
TCGA-EK-A2RL-01A	2.1	32.98	NA	Adenocarcinoma	positive	A9	Yes	I	No	C3	0.584	0.334	1.196	FALSE	C1	C5	Hormone	CIMP-high	CN_low	1.406	4.638	9.084	6.422	5.987	7.231	6.357	2.509
TCGA-RA-A741-01A	2.1	34.52	NA	Squamous	positive	A9	Yes	II	No	C3	2.169	0.445	2.892	FALSE	C3	C3	EMT	CIMP-low	CN_high	0.003	6.583	9.584	9.147	8.576	8.295	9.716	5.971
TCGA-JW-A5VL-01A	2.1	37.25	NA	Squamous	positive	A9	Yes	I	No	C3	47.419	14.212	66.608	TRUE	C2	C2	PI3K_AKT	CIMP-intermediate	CN_high	0	11.124	11.102	8.273	7.163	6.71	8.331	4.746
TCGA-C5-A1M8-01A	2.1	43.39	NA	Squamous	positive	A9	Yes	I	No	C1	0.868	0.198	1.325	FALSE	C2	C2	PI3K_AKT	CIMP-intermediate	CN_high	0.013	7.508	11.536	8.795	7.904	8.277	9.022	3.714
TCGA-MY-A5BE-01A	2.2	42.34	NA	Squamous	positive	A9	Yes	I	No	C1	1.057	0.334	1.557	FALSE	C3	C3	NA	CIMP-low	CN_high	0.007	8.227	11.333	10.091	10.141	9.56	11.91	6.566
TCGA-JW-A5VK-01A	2.2	43.71	NA	Squamous	positive	A9	Yes	I	No	NA	0.807	0.306	1.335	FALSE	C2	C6	NA	CIMP-intermediate	CN_high	0.007	8.789	10.54	8.688	7.892	7.365	8.498	2.681
TCGA-EA-A3QE-01A	2.2	45.07	NA	Squamous	positive	A9	Yes	I	No	C2	1.418	0.362	2.058	FALSE	C2	C3	NA	CIMP-intermediate	CN_low	0.011	9.907	10.82	10.35	8.824	8.924	10.538	5.42
TCGA-EA-A6QX-01A	2.2	49.38	LVSI_LNpos	Squamous	positive	A9	Yes	III_IV	No	NA	1.836	0.751	2.865	FALSE	C2	C3	PI3K_AKT	CIMP-intermediate	CN_low	0.003	10.39	9.691	10.359	8.799	9.484	10.994	5.111
TCGA-EX-A1H5-01A	2.2	58.42	LVSI_LNpos	Squamous	positive	A9	Yes	II	No	C1	0.563	0.274	1.264	FALSE	C2	C1	PI3K_AKT	CIMP-intermediate	CN_high	0	6.281	10.784	9.22	7.602	9.427	9.652	3.484
TCGA-C5-A2M1-01A	2.3	37.88	NA	Adenocarcinoma	positive	A9	Yes	I	No	C2	2.03	0.695	3.059	FALSE	C1	C5	NA	CIMP-high	CN_low	0.7	5.188	9.561	7.564	7.382	7.966	9.375	4.808
TCGA-R2-A69V-01A	2.3	42.38	LVSI_LNneg	Squamous	positive	A7	Yes	I	No	NA	2.364	0.973	3.504	FALSE	C2	C3	EMT	CIMP-low	CN_low	0.011	10.328	7.468	7.846	7.725	7.801	10.01	6.971
TCGA-LP-A7HU-01A	2.4	53.65	NA	Adenocarcinoma	positive	A9	Yes	II	No	C3	3.588	1.391	5.284	FALSE	C1	C5	Hormone	CIMP-high	CN_high	1.539	5.947	8.789	6.838	6.88	7.029	8.764	4.452
TCGA-EA-A5ZD-01A	2.5	40.05	NA	Squamous	positive	A9	Yes	I	No	NA	0.334	0.139	0.501	FALSE	C2	C3	EMT	CIMP-low	CN_low	0.009	9.107	10.092	9.632	7.048	7.187	8.395	3.624
TCGA-IR-A3LC-01A	2.5	40.24	LVSI_LNneg	Squamous	positive	A9	Yes	I	No	C2	0.973	0.25	1.53	FALSE	C1	C3	Hormone	CIMP-high	CN_low	0.007	5.32	8.727	8.113	5.081	7.058	6.711	2.571
TCGA-FU-A3NI-01A	2.6	45.27	LVSI_LNpos	Squamous	positive	A9	No	I	No	C2	2.086	0.807	3.004	FALSE	C2	C1	NA	CIMP-intermediate	CN_high	0.006	5.056	9.649	9.758	7.616	8.044	8.26	3.918
TCGA-EK-A3GN-01A	2.6	47.71	NA	Squamous	positive	A9	Yes	III_IV	No	C3	1.363	0.862	2.503	FALSE	C3	C4	EMT	CIMP-intermediate	CN_high	0.009	2.86	8.442	8.551	6.948	7.193	8.099	3.159
TCGA-EK-A2R7-01A	2.7	45.14	LVSI_LNneg	Squamous	positive	A7	Yes	I	No	C2	2.809	0.751	3.949	FALSE	C1	C5	Hormone	CIMP-low	CN_high	1.417	7.295	9.779	8.734	7.499	8.82	9.316	5.206
TCGA-BI-A20A-01A	2.7	49.87	LVSI_LNneg	Squamous	positive	A9	Yes	I	No	C2	1.14	0.389	1.808	FALSE	C3	C1	NA	CIMP-intermediate	CN_high	0.414	7.156	11.323	9.281	8.522	8.446	9.939	4.929
TCGA-DG-A2KJ-01A	2.7	50	NA	Squamous	positive	A7	Yes	III_IV	No	C1	0.028	0.028	0.056	FALSE	C1	C5	NA	CIMP-low	CN_low	4.075	5.185	7.403	6.956	8.749	8.399	9.083	3.582
TCGA-DS-A5RQ-01A	2.7	80.84	LVSI_LNneg	Squamous	positive	A9	No	I	No	C2	2.253	0.946	3.504	FALSE	C2	C2	Hormone	CIMP-low	CN_high	0.011	13.284	10.457	9.607	8.606	8.535	9.733	3.963
TCGA-FU-A5XV-01A	2.8	32.01	LVSI_LNpos	Squamous	positive	A7	Yes	III_IV	No	C2	2.058	0.612	3.059	FALSE	C2	C3	NA	CIMP-intermediate	CN_low	0.003	9.634	8.925	9.152	6.387	7.238	7.405	2.925
TCGA-BI-A0VR-01A	2.8	53.32	LVSI_LNpos	Squamous	positive	A9	No	III_IV	No	C2	1.975	0.807	2.948	FALSE	C2	C1	NA	CIMP-low	CN_high	0.011	11.194	9.901	9.6	8.253	8.225	9.823	4.772
TCGA-MY-A5BF-01A	2.8	68.67	LVSI_LNpos	Squamous	positive	A9	No	II	No	C1	0.111	0.056	0.167	FALSE	C2	C2	Hormone	CIMP-intermediate	CN_low	0.011	11.24	10.57	9.247	7.087	8.317	9.623	4.236
TCGA-EK-A3GK-01A	2.9	33.42	LVSI_LNneg	Adenocarcinoma	positive	A9	Yes	I	No	C2	27.978	9.817	40.716	TRUE	C1	C3	PI3K_AKT	CIMP-intermediate	CN_low	0.006	8.187	10.507	8.473	6.535	8.116	8.283	3.651
TCGA-EA-A5FO-01A	2.9	59.03	NA	Squamous	positive	A9	Yes	I	No	C2	1.696	0.64	2.475	FALSE	C3	C3	NA	CIMP-high	CN_low	0.523	6.456	9.968	8.351	6.661	7.776	8.752	2.634
TCGA-EA-A3HQ-01A	2.9	60.14	NA	Squamous	positive	A9	Yes	II	No	C2	1.891	0.612	2.726	FALSE	C2	C4	PI3K_AKT	CIMP-high	CN_low	0.006	4.777	9.19	9.26	6.481	6.959	8.357	3.422
TCGA-EK-A2PI-01A	3	44.69	NA	Squamous	positive	A9	Yes	III_IV	No	C2	1.808	0.584	2.698	FALSE	C2	C3	NA	CIMP-low	CN_high	0.01	8.823	11.71	9.424	5.793	8.82	9.086	3.634
TCGA-Q1-A73P-01A	3	45.04	NA	Adenocarcinoma	positive	A7	Yes	I	No	C4	5.59	1.808	8.316	FALSE	C1	C5	Hormone	CIMP-high	CN_low	7.185	6.932	10.011	8.768	8.493	8.112	9.102	3.301
TCGA-DG-A2KM-01A	3	46.02	NA	Squamous	positive	A9	Yes	I	No	C1	2.753	0.946	3.894	FALSE	C2	C3	PI3K_AKT	CIMP-low	CN_low	0.004	10.602	9.896	10.638	9.052	9.197	11.28	7.252
TCGA-C5-A1M5-01A	3	53.86	LVSI_LNneg	Squamous	positive	A9	Yes	I	No	NA	0.918	0.501	1.502	FALSE	C2	C1	PI3K_AKT	CIMP-intermediate	CN_high	0.003	10.406	10.789	9.252	8.495	8.787	9.867	4.71
TCGA-FU-A3WB-01A	3.1	43.35	NA	Squamous	positive	A9	Yes	II	No	C3	1.557	0.306	2.058	FALSE	C2	C5	NA	CIMP-intermediate	CN_low	0.004	6.454	10.778	9.28	7.041	7.797	9.119	4.41
TCGA-C5-A1MF-01A	3.1	49.04	LVSI_LNneg	Squamous	positive	A7	Yes	I	No	NA	1.724	0.556	2.475	FALSE	C1	C6	Hormone	CIMP-intermediate	CN_high	3.685	6.275	7.286	6.067	8.063	8.849	9.813	5.622
TCGA-IR-A3LA-01A	3.1	60.09	LVSI_LNneg	Adenocarcinoma	negative	negative	No	I	Yes	NA	23.501	8.149	34.125	TRUE	C1	C6	Hormone	CIMP-low	CN_low	2.401	6.465	10.813	8.507	6.453	9.267	8.32	3.752
TCGA-C5-A1BI-01B	3.2	31.66	NA	Squamous	positive	A9	Yes	III_IV	No	C4	2.503	0.807	3.393	FALSE	C2	C1	NA	CIMP-low	CN_high	0.011	10.513	10.709	9.633	6.886	7.061	8.722	4.67
TCGA-IR-A3LF-01A	3.2	64.95	NA	Adenocarcinoma	positive	A9	No	I	No	C4	1.891	0.751	2.837	FALSE	C1	C5	NA	CIMP-high	CN_high	0.742	6.239	10.008	7.736	8.068	8.459	9.364	4.101
TCGA-FU-A40J-01A	3.3	38.83	LVSI_LNpos	Adenocarcinoma	positive	A9	Yes	III_IV	No	C4	4.227	1.196	5.952	FALSE	C1	C3	NA	CIMP-high	CN_high	0.011	6.824	10.853	8.399	7.702	8.209	8.431	3.178
TCGA-Q1-A5R3-01A	3.3	56.33	NA	Squamous	positive	A7	Yes	NA	No	C1	1.418	0.445	1.975	FALSE	C3	C3	EMT	CIMP-low	CN_high	2.127	10.5	9.746	6.959	8.868	9.075	8.947	4.704
TCGA-EA-A3QD-01A	3.3	59.29	LVSI_LNpos	Squamous	positive	A9	Yes	III_IV	No	C2	2.114	0.751	2.948	FALSE	C2	C3	Hormone	CIMP-high	CN_low	0.001	7.076	11.701	9.045	8.123	8.694	10.055	5.449
TCGA-EA-A3HU-01A	3.4	43.56	NA	Squamous	positive	A9	Yes	II	No	C3	22.249	7.231	32.734	TRUE	C2	C4	PI3K_AKT	CIMP-low	CN_high	0.006	11.546	9.712	10.58	8.404	8.88	10.51	5.463
TCGA-C5-A2LX-01A	3.5	54.95	LVSI_LNpos	Squamous	positive	A9	Yes	I	No	C4	3.977	1.224	5.618	FALSE	C3	C4	Hormone	CIMP-intermediate	CN_high	0.011	8.283	12.544	7.254	8.829	8.704	10.684	7.156
TCGA-HG-A2PA-01A	3.7	38.4	LVSI_LNneg	Squamous	positive	A9	Yes	I	No	C1	1.613	0.584	2.392	FALSE	C2	C5	Hormone	CIMP-intermediate	CN_low	0.364	9.98	9.92	9.197	7.824	8.064	8.54	3.931
TCGA-C5-A3HE-01A	3.7	44.19	NA	Squamous	positive	A7	Yes	I	No	C2	6.897	3.337	11.542	FALSE	C1	C5	NA	CIMP-intermediate	CN_high	1.534	6.218	6.417	7.549	7.141	7.651	8.604	4.985
TCGA-EA-A78R-01A	3.7	54.6	LVSI_LNneg	Squamous	positive	A9	Yes	I	No	NA	1.613	0.528	2.447	#NUM!	C2	C3	PI3K_AKT	CIMP-intermediate	CN_high	0.013	9.131	9.451	8.221	8	8.734	9.98	4.186
TCGA-FU-A2QG-01A	3.8	29.75	NA	Squamous	positive	A9	No	I	No	C2	1.947	0.779	3.087	FALSE	C2	C2	Hormone	CIMP-low	CN_high	0.006	7.891	8.753	7.663	4.122	4.96	6.584	3.223
TCGA-EK-A2GZ-01A	3.8	64.61	NA	Squamous	positive	A9	Yes	III_IV	No	NA	1.669	0.667	2.503	FALSE	C2	C4	NA	CIMP-low	CN_high	0.003	6.233	8.952	9.234	6.115	8.037	9.117	3.892
TCGA-MU-A51Y-01A	3.9	27.92	NA	Squamous	positive	A9	Yes	II	No	C3	3.615	1.418	5.368	FALSE	C2	C2	Hormone	CIMP-low	CN_low	0.011	11.6	11.246	10.307	8.813	9.407	10.618	4.635
TCGA-DS-A0VK-01A	4	45.97	LVSI_LNpos	Squamous	positive	A9	Yes	I	No	C2	2.503	1.029	3.671	FALSE	C2	C1	EMT	CIMP-intermediate	CN_high	0.006	6.22	9.909	9.266	6.456	7.308	8.088	2.759
TCGA-C5-A1MH-01A	4	71.83	NA	Squamous	positive	A9	Yes	III_IV	No	C2	6.174	1.724	8.121	FALSE	C2	C1	NA	CIMP-intermediate	CN_high	0.003	8.565	9.582	9.355	7.842	7.921	9.44	3.954
TCGA-C5-A1M7-01A	4.1	37.8	NA	Squamous	positive	A7	Yes	I	No	C3	2.712	1.113	3.859	FALSE	C2	C1	EMT	CIMP-low	CN_low	0	8.673	8.261	8.806	5.998	7.239	7.713	2.822
TCGA-C5-A1MI-01A	4.2	50.2	LVSI_LNpos	Squamous	positive	A7	Yes	I	No	C4	0.959	0.457	1.903	FALSE	C1	C6	PI3K_AKT	CIMP-low	CN_high	4.277	6.674	10.349	8.798	7.504	8.372	8.958	4.8
TCGA-EA-A5ZE-01A	4.2	54.4	NA	Squamous	positive	A7	Yes	I	No	NA	1.029	0.473	1.836	FALSE	C3	C3	Hormone	CIMP-intermediate	CN_high	0.007	2.11	5.436	8.376	6.931	7.893	9.164	3.507
TCGA-Q1-A73S-01A	4.6	33.48	LVSI_LNpos	Adenosquamous	positive	A7	Yes	I	No	C3	0.918	0.417	1.474	FALSE	C3	C6	Hormone	CIMP-low	CN_low	1.088	8.488	10.816	6.151	2.595	8.037	4.442	2.723
TCGA-EK-A2RC-01A	4.7	33.82	LVSI_LNneg	Squamous	positive	A9	Yes	I	No	C1	3.671	1.418	5.507	FALSE	C2	C4	Hormone	CIMP-intermediate	CN_low	0.82	9.247	10.784	9.226	7.988	8.279	9.419	4.741
TCGA-FU-A23K-01A	4.8	28.89	LVSI_LNpos	Squamous	positive	A7	Yes	III_IV	No	C1	2.364	0.946	3.449	FALSE	C1	C1	PI3K_AKT	CIMP-intermediate	CN_low	0.013	7.05	9	5.593	6.621	7.285	8.649	4.793
TCGA-EA-A556-01A	4.8	38.3	NA	Adenocarcinoma	negative	negative	No	I	Yes	NA	0.501	0.306	1.029	FALSE	C1	C6	Hormone	CIMP-low	CN_low	0.001	6.238	9.217	6.67	5.079	8.177	7.404	3.124
TCGA-EA-A50E-01A	4.8	45.47	LVSI_LNpos	Squamous	positive	A9	Yes	III_IV	No	C1	2.364	0.89	3.337	FALSE	C2	C3	EMT	CIMP-intermediate	CN_low	0.009	6.217	8.105	8.109	4.566	5.131	6.908	3.16
TCGA-FU-A3TX-01A	4.8	78.92	NA	Squamous	positive	A7	Yes	I	No	C2	1.335	0.362	1.808	FALSE	C3	C4	Hormone	CIMP-low	CN_high	0.315	6.001	10.887	9.71	7.2	8.841	10.025	4.388
TCGA-FU-A3YQ-01A	4.9	35.09	NA	Squamous	positive	A9	Yes	I	No	C3	1.446	0.473	2.086	FALSE	C2	C3	NA	CIMP-intermediate	CN_low	0.009	12.361	10.054	9.681	8.372	8.439	9.594	3.775
TCGA-Q1-A6DW-01A	4.9	44.35	NA	Squamous	positive	A9	Yes	I	No	C4	2.67	0.807	3.838	FALSE	C2	C2	PI3K_AKT	CIMP-intermediate	CN_low	0.007	10.047	9.616	8.681	6.411	7.399	8.36	2.99
TCGA-C5-A1BJ-01A	5.1	34.53	NA	Squamous	positive	A9	Yes	II	No	C3	1.751	0.457	2.68	FALSE	C2	C1	EMT	CIMP-low	CN_high	0	9.911	10.062	8.808	7.098	7.916	8.746	4.023
TCGA-DS-A3LQ-01A	5.1	46.16	LVSI_LNpos	Squamous	positive	other	Yes	III_IV	No	NA	0.528	0.25	1.085	FALSE	C2	C2	Hormone	CIMP-intermediate	CN_high	0.009	6.521	10.389	8.512	5.184	7.957	8.459	3.157
TCGA-FU-A3TQ-01A	5.2	55.58	LVSI_LNpos	Squamous	positive	A9	No	III_IV	No	C3	1.307	0.501	1.919	FALSE	C2	C3	PI3K_AKT	CIMP-intermediate	CN_high	0	12.654	11.05	9.588	5.417	7.622	8.22	3.575
TCGA-FU-A770-01A	5.3	33.53	NA	Adenocarcinoma	positive	A9	Yes	III_IV	No	C4	1.252	0.389	1.78	FALSE	C1	C5	NA	CIMP-intermediate	CN_high	0.01	6.359	8.847	7.678	6.255	7.558	5.003	2.482
TCGA-HM-A6W2-01A	5.3	34.98	LVSI_LNneg	Adenosquamous	negative	negative	No	III_IV	Yes	NA	0.111	0	0.111	FALSE	C1	C6	NA	CIMP-low	CN_low	0.007	4.424	6.312	5.39	4.273	6.917	6.297	1.189
TCGA-EK-A2H0-01A	5.5	24.42	NA	Squamous	positive	A7	Yes	II	No	NA	3.838	1.085	5.34	FALSE	C2	C3	PI3K_AKT	CIMP-intermediate	CN_high	0.009	9.676	9.827	8.674	7.428	7.017	7.117	3.101
TCGA-EK-A2IP-01A	5.5	28.33	NA	Squamous	positive	A9	Yes	I	No	NA	2.253	1.196	3.588	FALSE	C2	C3	PI3K_AKT	CIMP-intermediate	CN_low	0.014	8.139	8.84	7.569	6.279	6.398	6.926	4.044
TCGA-JW-A5VI-01A	5.7	45.02	NA	Squamous	positive	other	Yes	II	No	NA	1.696	0.362	2.447	FALSE	C2	C2	NA	CIMP-intermediate	CN_high	0.01	9.694	11.263	9.258	7.959	7.679	8.598	4.207
TCGA-C5-A2M2-01A	5.7	56.07	NA	Adenocarcinoma	positive	A9	No	I	No	C3	1.307	0.362	2.002	FALSE	C1	C5	Hormone	CIMP-high	CN_low	0.013	4.575	9.442	7.926	7.872	8.356	8.811	1.745
TCGA-MU-A5YI-01A	5.9	60.03	LVSI_LNneg	Squamous	positive	A9	Yes	I	No	C1	2.559	1.085	3.866	FALSE	C2	C1	NA	CIMP-intermediate	CN_low	0.003	7.515	9.127	9.351	7.724	8.883	9.953	4.708
TCGA-MY-A5BD-01A	6	62.7	NA	Squamous	positive	A9	Yes	II	No	C1	5.674	2.058	8.427	FALSE	C1	C6	NA	CIMP-high	CN_low	0.939	7.292	11.956	8.489	8.115	8.612	9.596	5.125
TCGA-LP-A4AW-01A	6.1	63	NA	Squamous	positive	other	No	I	No	NA	9.317	2.753	12.765	FALSE	C2	C3	EMT	CIMP-low	CN_high	0.004	9.141	8.437	8.391	7.448	8.279	9.084	4.002
TCGA-C5-A3HF-01A	6.3	24.96	NA	Adenocarcinoma	positive	A7	Yes	I	No	C3	0.695	0.195	0.946	FALSE	C1	C5	NA	CIMP-low	CN_low	6.291	8.676	8.159	8.829	7.211	7.74	8.374	4.374
TCGA-EX-A69L-01A	6.4	41.4	NA	Squamous	positive	A9	Yes	I	No	C4	1.557	0.473	2.197	FALSE	C3	C3	EMT	CIMP-low	CN_high	0.011	7.774	10.32	9.703	7.785	8.16	10.12	5.374
TCGA-EK-A2RO-01A	6.4	59.81	NA	Squamous	positive	A9	Yes	II	No	C1	2.698	0.723	3.643	FALSE	C2	C4	Hormone	CIMP-intermediate	CN_low	0.004	8.288	10.564	8.411	4.526	7.68	8.814	3.149
TCGA-HM-A3JJ-01A	6.6	40.35	LVSI_LNpos	Squamous	positive	A9	Yes	I	No	C3	0.167	0.028	0.195	FALSE	C2	C1	EMT	CIMP-intermediate	CN_high	0.006	5.656	3.535	8.472	6.436	7.517	8.589	3.385
TCGA-C5-A1MN-01A	6.7	42.43	NA	Squamous	positive	A9	Yes	III_IV	No	C2	3.476	1.085	4.7	FALSE	C2	C1	EMT	CIMP-intermediate	CN_high	0.007	8.032	9.721	8.944	2.746	7.156	8.652	1.715
TCGA-C5-A1M6-01A	6.9	55	NA	Squamous	positive	A7	Yes	II	No	C4	2.809	0.918	4.005	FALSE	C1	C1	EMT	CIMP-intermediate	CN_low	2.712	4.335	8.559	7.869	6.242	8.333	7.782	3.92
TCGA-EA-A5ZF-01A	7	56.14	NA	Adenosquamous	positive	A7	Yes	I	No	C4	1.391	0.695	2.308	FALSE	C1	C5	Hormone	CIMP-low	CN_high	2.92	5.719	10.824	8.482	6.967	8.913	8.841	5.592
TCGA-EA-A4BA-01A	7.2	49.27	NA	Adenocarcinoma	negative	negative	No	I	Yes	NA	1.14	0.334	1.613	FALSE	C1	C6	Hormone	CIMP-low	CN_low	0	3.83	8.936	5.952	3.829	7.408	6.174	3.769
TCGA-IR-A3LB-01A	7.4	53.04	LVSI_LNneg	Adenocarcinoma	positive	A7	Yes	I	No	NA	1.168	0.334	1.752	FALSE	C1	C3	Hormone	CIMP-high	CN_low	7.668	4.912	8.014	6.714	6.505	6.714	7.866	3.493
TCGA-Q1-A6DT-01A	7.4	55.54	NA	Squamous	positive	A9	Yes	I	No	C4	4.033	1.085	5.423	FALSE	C2	C4	NA	CIMP-intermediate	CN_high	0.013	5.42	8.703	8.088	4.214	6.562	7.012	3.434
TCGA-C5-A1MP-01A	7.6	34.75	LVSI_LNpos	Squamous	positive	A9	Yes	I	No	C4	0.807	0.334	1.224	FALSE	C2	C1	Hormone	CIMP-low	CN_low	0.548	6.464	9.37	8.568	7.422	7.776	9.188	4.343
TCGA-C5-A3HD-01B	7.8	51.17	NA	Squamous	positive	A9	Yes	II	No	C4	2.642	0.807	3.615	FALSE	C3	C4	NA	CIMP-intermediate	CN_high	0.004	4.103	9.297	9.514	8.04	7.591	8.029	3.112
TCGA-DS-A0VN-01A	7.9	47.73	NA	Squamous	positive	A9	Yes	I	No	C2	3.031	1.057	4.283	FALSE	C2	C2	Hormone	CIMP-intermediate	CN_high	0.014	9.831	9.824	9.225	8.077	7.527	9.698	5.697
TCGA-DG-A2KK-01A	8.4	51	LVSI_LNpos	Squamous	positive	A9	Yes	III_IV	No	C4	6.536	2.281	9.261	FALSE	C1	C5	PI3K_AKT	CIMP-high	CN_low	1.181	7.704	10.395	8.647	7.195	9.064	10.231	4.078
TCGA-C5-A1MK-01A	8.5	79.23	NA	Squamous	positive	A9	Yes	III_IV	No	NA	7.064	2.169	9.651	FALSE	C2	C1	NA	CIMP-low	CN_high	0.009	10.477	9.226	9.267	6.385	7.344	8.946	3.471
TCGA-C5-A7CJ-01A	8.8	42.85	NA	Squamous	positive	A9	No	II	No	C3	1.641	0.751	2.559	FALSE	C2	C3	NA	CIMP-intermediate	CN_low	0.011	10.047	9.842	9.739	6.905	7.638	8.516	3.948
TCGA-JW-A5VG-01A	9	35.89	NA	Squamous	positive	A7	Yes	II	No	NA	0.807	0.139	1.112	FALSE	C3	C3	NA	CIMP-low	CN_low	0.013	4.705	9.184	7.434	6.862	7.056	8.511	3.674
TCGA-Q1-A73O-01A	10	37.24	NA	Squamous	positive	A7	Yes	I	No	C4	33.93	11.041	48.281	TRUE	C2	C3	NA	CIMP-low	CN_low	0.47	8.863	7.525	9.006	7.441	7.327	8.48	4.356
TCGA-Q1-A73R-01A	10.4	45.73	NA	Adenocarcinoma	positive	A9	Yes	I	No	C4	1.502	0.306	2.114	FALSE	C1	C5	Hormone	CIMP-high	CN_low	0.337	4.555	8.295	7.669	5.893	6.887	7.282	2.852
TCGA-EK-A2RE-01A	10.7	26.68	NA	Squamous	positive	A9	Yes	II	No	C1	0.417	0.222	0.946	FALSE	C2	C2	EMT	CIMP-low	CN_low	0.009	9.496	9.598	9.077	6.571	7.028	8.168	1.596
TCGA-C5-A1ML-01A	10.7	49.47	NA	Squamous	positive	A9	No	I	No	C4	1.599	0.548	2.604	FALSE	C3	C1	NA	CIMP-low	CN_high	0.01	8.725	9.253	9.394	6.317	8.423	9.565	3.337
TCGA-EK-A2PK-01A	10.8	43.64	NA	Squamous	positive	A7	Yes	I	No	C3	0.083	0	0.111	FALSE	C1	C3	Hormone	CIMP-low	CN_high	0.001	5.884	6.303	8.509	6.628	7.727	10.19	5.208
TCGA-EK-A2R9-01A	10.8	58.16	LVSI_LNneg	Squamous	positive	A9	No	I	No	NA	0.807	0.213	1.325	FALSE	C3	C1	Hormone	CIMP-intermediate	CN_low	0.011	4.441	8.818	7.767	7.727	8.331	9.962	5.124
TCGA-C5-A7CM-01A	12.1	35.19	NA	Adenocarcinoma	positive	A7	Yes	I	No	C1	0.528	0.139	0.862	FALSE	C1	C5	NA	CIMP-low	CN_low	1.827	4.67	7.765	7.355	6.508	7.492	7.049	4.241
TCGA-JX-A3Q8-01A	12.6	40.63	NA	Adenocarcinoma	positive	A9	No	I	Yes	C3	1.446	0.334	1.863	FALSE	C1	C5	NA	CIMP-high	CN_high	1.879	5.587	10.667	7.288	7.403	8.665	9.284	2.742
TCGA-C5-A7CH-01A	13.4	43.2	NA	Squamous	positive	A9	No	II	No	C4	1.391	0.362	2.002	FALSE	C2	C2	NA	CIMP-intermediate	CN_high	0.006	9.961	10.141	8.037	4.16	6.662	6.873	1.8
TCGA-JW-A69B-01A	13.4	44.03	NA	Adenocarcinoma	positive	A9	Yes	I	No	C2	2.197	0.556	3.004	FALSE	C1	C5	NA	CIMP-high	CN_low	6.458	1.58	2.011	8.386	7.957	7.933	8.766	3.544
TCGA-EA-A3HT-01A	13.4	68.83	NA	Squamous	positive	A9	No	I	No	C3	2.225	0.973	3.393	FALSE	C2	C3	EMT	CIMP-low	CN_low	0.001	9.305	10.319	9.431	7.016	7.447	8.613	3.437
TCGA-C5-A7CK-01A	13.7	58.92	NA	Squamous	positive	A9	Yes	III_IV	No	C3	3.115	0.807	4.311	FALSE	C2	C3	PI3K_AKT	CIMP-intermediate	CN_high	0.417	5.707	10.133	9.61	6.641	7.687	6.703	2.247
TCGA-C5-A1BN-01B	13.9	26.78	NA	Squamous	positive	A7	Yes	I	No	NA	0.883	0.32	1.66	FALSE	C2	C1	NA	CIMP-low	CN_high	0.011	3.487	0.5	9.124	5.701	6.696	7.087	0.772
TCGA-HM-A3JK-01A	14.2	64.66	NA	Squamous	positive	A9	Yes	II	No	NA	1.057	0.584	1.78	FALSE	C2	C1	NA	CIMP-low	CN_high	0.013	5.903	8.539	9.173	7.248	8.527	9.377	3.52
TCGA-DS-A0VM-01A	14.4	51.58	LVSI_LNpos	Squamous	positive	A9	Yes	I	No	C3	6.174	2.503	9.039	FALSE	C3	C1	PI3K_AKT	CIMP-intermediate	CN_low	0.01	7.188	10.877	8.953	8.301	8.782	9.721	4.817
TCGA-EA-A411-01A	14.7	50.82	NA	Squamous	positive	A9	No	I	No	C1	1.196	0.473	1.808	FALSE	C3	C3	EMT	CIMP-low	CN_high	0.007	6.69	10.125	9.134	6.866	7.869	8.291	4.454
TCGA-C5-A1MJ-01A	14.8	61.08	LVSI_LNneg	Adenocarcinoma	positive	A7	Yes	I	No	C4	1.947	0.751	2.837	FALSE	C1	C1	Hormone	CIMP-high	CN_low	5.356	4.382	9.115	8.314	6.725	6.305	7.153	1.968
TCGA-DG-A2KL-01A	15.3	53.5	LVSI_LNneg	Squamous	positive	A9	No	II	No	C2	3.449	1.863	5.729	FALSE	C2	C3	Hormone	CIMP-low	CN_low	0.004	10.828	8.429	9.101	6.574	7.734	8.365	3.329
TCGA-EA-A43B-01A	15.5	43.45	NA	Squamous	positive	A9	No	I	No	C2	2.586	0.973	4.005	FALSE	C3	C3	EMT	CIMP-intermediate	CN_high	0.011	8.524	10.704	8.479	7.013	7.802	8.942	5.523
TCGA-FU-A3HY-01A	15.5	47.17	LVSI_LNpos	Squamous	positive	A9	Yes	I	No	C3	3.671	1.391	5.534	FALSE	C2	C2	NA	CIMP-intermediate	CN_low	0.007	10.79	11.747	9.774	6.082	7.478	8.213	2.002
TCGA-C5-A2LT-01A	15.7	38.24	NA	Squamous	positive	A7	Yes	I	No	NA	0.056	0.083	0.139	FALSE	C3	C3	Hormone	CIMP-low	CN_high	0.013	3.13	2.013	7.265	6.085	6.837	8.182	3.944
TCGA-EK-A2RM-01A	16.7	40.47	LVSI_LNneg	Squamous	positive	A7	Yes	I	No	C2	0.056	0	0.056	FALSE	C1	C3	Hormone	CIMP-low	CN_high	0.467	5.985	9.532	8.334	6.96	8.058	8.454	3.735
TCGA-EA-A3Y4-01A	17.1	40.26	NA	Squamous	positive	A7	Yes	I	No	NA	2.781	1.029	4.088	FALSE	C3	C3	Hormone	CIMP-low	CN_low	0.001	6.05	5.383	7.289	8.596	8.148	10.446	7.013
TCGA-EA-A410-01A	21.5	51.25	NA	Squamous	negative	negative	No	II	Yes	NA	0.973	0.278	2.141	FALSE	C1	C3	Hormone	CIMP-low	CN_low	0	4.311	3.704	6.44	4.92	5.709	7.01	1.929
TCGA-C5-A7CL-01A	21.9	48.92	NA	Squamous	positive	A9	Yes	III_IV	No	C4	3.449	1.085	4.978	FALSE	C2	C3	NA	CIMP-low	CN_high	0.01	8.198	5.093	8.853	6.678	7.534	8.096	3.911
TCGA-EA-A439-01A	21.9	50.73	LVSI_LNneg	Squamous	positive	A7	Yes	II	No	C4	2.42	1.14	3.894	FALSE	C1	C3	Hormone	CIMP-intermediate	CN_high	1.791	3.392	7.922	7.967	7.244	8.597	8.76	4.202
TCGA-FU-A57G-01A	23.4	49.02	NA	Adenocarcinoma	negative	negative	No	I	Yes	NA	0.751	0.167	0.973	FALSE	C1	C5	Hormone	CIMP-low	CN_low	0.003	5.601	8.103	6.745	6.376	7.495	6.51	2.049
TCGA-EA-A1QS-01A	23.8	46.33	NA	Squamous	positive	A7	Yes	I	No	NA	0.862	0.111	1	FALSE	C3	C1	NA	CIMP-low	CN_high	0.011	4.544	8.27	9.981	8.093	8.231	9.543	3.247
TCGA-C5-A0TN-01A	24.1	21.25	LVSI_LNpos	Squamous	positive	A9	Yes	I	No	C4	0.487	0.137	0.868	FALSE	C3	C3	EMT	CIMP-low	CN_high	0.014	4.277	9.286	9.427	4.544	7.415	7.865	3.633
TCGA-EK-A2RJ-01A	25.2	51.1	LVSI_LNneg	Squamous	positive	A7	Yes	I	No	NA	8.01	2.364	10.93	FALSE	C3	C2	EMT	CIMP-low	CN_high	0.009	6.43	4.787	7.611	6.139	6.195	8.774	3.897
TCGA-JX-A3PZ-01A	25.7	25.47	LVSI_LNneg	Squamous	positive	A7	Yes	I	No	NA	1.057	0.445	1.696	FALSE	C3	C4	EMT	CIMP-low	CN_low	0.006	4.099	7.374	8.313	6.933	7.276	8.272	3.526
TCGA-LP-A4AU-01A	27	35.8	NA	Squamous	positive	A7	Yes	III_IV	No	C1	0.723	0.362	1.168	FALSE	C2	C3	NA	CIMP-low	CN_high	0.004	7.501	1.031	8.406	5.727	6.546	8.099	4.579
TCGA-BI-A0VS-01A	28.6	48.84	NA	Squamous	positive	A9	Yes	I	No	C4	2.531	0.862	3.588	FALSE	C2	C1	NA	CIMP-low	CN_high	0.013	7.637	11.346	9.089	5.622	6.828	7.454	3.412
TCGA-C5-A1M9-01A	32.2	46.6	LVSI_LNpos	Adenocarcinoma	positive	A9	Yes	I	No	C4	0.685	0.168	1.279	FALSE	C1	C3	Hormone	CIMP-high	CN_low	0.006	4.384	9.18	8.411	6.785	6.515	7.167	2.513
TCGA-IR-A3LH-01A	32.9	49.61	NA	Squamous	positive	A7	Yes	II	No	NA	19.19	6.564	27.951	TRUE	C3	C3	EMT	CIMP-intermediate	CN_high	0.011	5.445	8.624	9.344	7.85	8.074	10.379	6.046
TCGA-C5-A2LV-01A	37.6	36.82	NA	Squamous	positive	A9	Yes	I	No	C4	0.028	0	0.028	FALSE	C3	C3	EMT	CIMP-intermediate	CN_high	0.004	2.928	8.241	7.779	4.548	6.941	7.595	2.781
TCGA-EK-A2H1-01A	40.4	20.94	NA	Squamous	positive	A9	Yes	I	No	C1	0.723	0.167	1.085	FALSE	C3	C3	NA	CIMP-low	CN_high	0.006	6.837	9.233	8.715	6.515	8.512	9.806	4.399
TCGA-LP-A4AX-01A	41.6	45.3	NA	Squamous	positive	A9	Yes	I	No	C3	1.224	0.362	1.641	FALSE	C3	C3	EMT	CIMP-low	CN_high	0.007	4.144	7.381	8.989	7.87	8.196	9.796	5.759
TCGA-C5-A1BF-01B	48.4	46.48	NA	Squamous	positive	A7	Yes	I	No	C1	1.508	0.457	2.36	FALSE	C3	C1	NA	CIMP-low	CN_low	0.003	6.306	6.718	8.302	6.394	7.166	7.898	3.598
TCGA-JW-A5VH-01A	56.4	53.18	NA	Squamous	negative	negative	No	III_IV	Yes	NA	1.53	0.306	2.03	FALSE	C1	C6	NA	CIMP-low	CN_low	0.014	2.928	5.515	7.983	6.449	8.088	5.332	2.598
TCGA-EX-A3L1-01A	56.6	32.7	NA	Squamous	positive	A7	Yes	II	No	NA	0.695	0.222	1	FALSE	C3	C3	NA	CIMP-low	CN_high	0.013	7.972	9.613	9.311	6.604	7.369	7.852	2.132
TCGA-EK-A2R8-01A	69.3	48.44	NA	Squamous	positive	A7	Yes	I	No	NA	6.202	2.197	9.094	FALSE	C3	C4	EMT	CIMP-low	CN_high	0.01	4.687	5.611	7.237	5.611	5.877	6.748	1.407

## Sheet: Table S3
Primer	Sequences 5'to3'
LOXL2-F	GGGTGGAGGTGTACTATGATGG
LOXL2-R	CTTGCCGTAGGAGGAGCTG
APOBEC3A-F	TGGCATTGGAAGGCATAAGAC
APOBEC3A-R	TTAGCCTGGTTGTGTAGAAAGC
APOBEC3B-F	CGCCAGACCTACTTGTGCTAT
APOBEC3B-R	CATTTGCAGCGCCTCCTTAT
APOBEC3D-F	CTTTCGAGGCCCGGTACTAC
APOBEC3D-R	GTGATCTGGAAGCGCCTGTTA
APOBEC3F-F	CTGAAACCTGGAGCCTGGAG
APOBEC3F-R	AGTGCACCAAGACATGAGCT
APOBEC3G-F	GCATCGTGACCAGGAGTATGA
APOBEC3G-R	GTCAGGGTAACCTTCGGGT
APOBEC3H-F	AAGGCCCTCTTGTGTTACCAG
APOBEC3H-R	CACTGCGTTTCGTCCAGTC
GAPDH-F	GGAGCGAGATCCCTCCAAAAT
GAPDH-R	GGCTGTTGTCATACTTCTCATGG

## Sheet: Table S4
# region type = gene
# region name = LOXL2
# region coordinates = chr8:23297189-23425328
data_type	tcga_vs_a9ui_01	tcga_ek_a2ra_01	tcga_ek_a2pg_01	tcga_ma_aa3z_01	tcga_ek_a2rn_01	tcga_ek_a2rk_01	tcga_c5_a7co_01	tcga_ex_a69m_01	tcga_c5_a905_01	tcga_ek_a2rb_01	tcga_dr_a0zl_01	tcga_vs_a8ec_01	tcga_lp_a5u3_01	tcga_zj_aaxi_01	tcga_ma_aa42_01	tcga_vs_a9uv_01	tcga_c5_a1bl_01	tcga_vs_a9u5_01	tcga_dg_a2kh_01	tcga_jw_a5vj_01	tcga_vs_a8eg_01	tcga_vs_a957_01	tcga_c5_a7ue_01	tcga_lp_a5u2_01	tcga_ea_a3hr_01	tcga_ds_a0vl_01	tcga_fu_a23l_01	tcga_ir_a3ll_01	tcga_ir_a3li_01	tcga_ek_a3gj_01	tcga_ea_a44s_01	tcga_ea_a1qt_01	tcga_c5_a2ly_01	tcga_ek_a2ir_01	tcga_ir_a3l7_01	tcga_q1_a6dv_01	tcga_ir_a3lk_01	tcga_c5_a7cg_01	tcga_q1_a73q_01	tcga_ex_a1h6_01	tcga_xs_a8tj_01	tcga_zj_aaxj_01	tcga_jw_aavh_01	tcga_ds_a1ob_01	tcga_jx_a3q0_01	tcga_ek_a2pl_01	tcga_vs_a8eh_01	tcga_fu_a3eo_01	tcga_c5_a2lz_01
cnv	-1	0	-1	0	1	-1	0	-1	null	0	0	-2	-1	0	-1	-1	0	0	-1	0	0	0	0	0	-1	0	-1	0	0	-1	-1	-1	-1	null	0	0	-1	1	-1	0	1	-1	0	null	0	0	0	0	0
cg20981791	0.908	0.875	0.944	0.91	0.95	0.874	0.936	0.942	0.927	0.912	0.922	0.899	0.943	0.9	0.933	0.912	0.941	0.917	0.947	0.936	0.947	0.922	0.912	0.938	0.951	0.935	0.956	0.945	0.934	0.949	0.942	0.866	0.922	0.958	0.939	0.871	0.946	0.935	0.945	0.953	0.921	0.89	0.924	0.884	0.95	0.904	0.924	0.931	0.957
cg20142986	0.921	0.961	0.958	0.944	0.942	0.952	0.936	0.938	0.89	0.941	0.95	0.932	0.904	0.926	0.942	0.926	0.927	0.938	0.932	0.839	0.95	0.932	0.888	0.939	0.937	0.928	0.953	0.927	0.942	0.945	0.823	0.95	0.929	0.932	0.921	0.928	0.908	0.918	0.917	0.939	0.943	0.93	0.93	0.914	0.935	0.867	0.915	0.944	0.945
cg24531955	0.457	0.58	0.749	0.601	0.205	0.303	0.502	0.642	0.148	0.197	0.368	0.616	0.35	0.793	0.58	0.546	0.318	0.666	0.838	0.49	0.408	0.816	0.491	0.293	0.729	0.436	0.587	0.345	0.871	0.521	0.291	0.254	0.484	0.835	0.423	0.712	0.804	0.672	0.246	0.712	0.323	0.645	0.499	0.438	0.356	0.151	0.716	0.78	0.541
cg07963670	0.223	0.247	0.215	0.25	0.196	0.24	0.388	0.305	0.125	0.188	0.293	0.169	0.218	0.389	0.582	0.102	0.32	0.205	0.725	0.22	0.583	0.385	0.319	0.191	0.204	0.304	0.307	0.349	0.637	0.269	0.292	0.247	0.365	0.201	0.3	0.492	0.276	0.238	0.189	0.509	0.307	0.643	0.104	0.302	0.236	0.452	0.55	0.648	0.237
cg24531534	0.368	0.328	0.506	0.296	0.535	0.346	0.671	0.712	0.18	0.084	0.238	0.749	0.14	0.781	0.846	0.379	0.454	0.328	0.641	0.349	0.505	0.705	0.689	0.191	0.386	0.193	0.492	0.802	0.911	0.394	0.418	0.238	0.434	0.724	0.399	0.816	0.717	0.611	0.512	0.766	0.366	0.884	0.152	0.329	0.202	0.398	0.844	0.786	0.436
cg07396746	0.121	0.141	0.175	0.121	0.309	0.205	0.299	0.254	0.072	0.119	0.138	0.267	0.12	0.304	0.458	0.079	0.207	0.129	0.187	0.144	0.108	0.283	0.319	0.148	0.169	0.133	0.261	0.301	0.56	0.306	0.145	0.123	0.202	0.397	0.126	0.325	0.197	0.203	0.15	0.4	0.238	0.333	0.07	0.178	0.131	0.206	0.353	0.673	0.165
cg16661761	0.475	0.388	0.798	0.599	0.795	0.455	0.759	0.847	0.072	0.327	0.346	0.883	0.834	0.873	0.804	0.716	0.526	0.441	0.859	0.64	0.47	0.894	0.754	0.793	0.32	0.584	0.689	0.824	0.893	0.864	0.594	0.232	0.505	0.851	0.611	0.771	0.898	0.668	0.683	0.855	0.694	0.779	0.405	0.363	0.794	0.711	0.822	0.858	0.668
cg21397592	0.791	0.89	0.898	0.874	0.842	0.915	0.924	0.877	0.685	0.642	0.876	0.86	0.882	0.865	0.872	0.928	0.892	0.861	0.884	0.864	0.913	0.878	0.856	0.866	0.893	0.872	0.887	0.84	0.856	0.884	0.813	0.89	0.913	0.911	0.878	0.847	0.888	0.854	0.867	0.902	0.887	0.909	0.85	0.864	0.88	0.883	0.912	0.882	0.876
cg17804498	0.98	0.888	0.963	0.976	0.975	0.971	0.926	0.975	0.946	0.771	0.852	0.848	0.929	0.96	0.947	0.984	0.931	0.974	0.969	0.953	0.972	0.978	0.931	0.967	0.951	0.949	0.956	0.969	0.976	0.978	0.887	0.951	0.962	0.978	0.957	0.984	0.95	0.987	0.98	0.976	0.908	0.974	0.928	0.962	0.965	0.951	0.978	0.977	0.971
cg19877248	null	null	null	null	null	null	null	null	null	null	null	null	null	null	null	null	null	null	null	null	null	null	null	null	null	null	null	null	null	null	null	null	null	null	null	null	null	null	null	null	null	null	null	null	null	null	null	null	null
cg18406934	null	null	null	null	null	null	null	null	null	null	null	null	null	null	null	null	null	null	null	null	null	null	null	null	null	null	null	null	null	null	null	null	null	null	null	null	null	null	null	null	null	null	null	null	null	null	null	null	null
cg08884476	null	null	null	null	null	null	null	null	null	null	null	null	null	null	null	null	null	null	null	null	null	null	null	null	null	null	null	null	null	null	null	null	null	null	null	null	null	null	null	null	null	null	null	null	null	null	null	null	null
cg09535960	0.145	0.142	0.115	0.285	0.065	0.206	0.074	0.11	0.037	0.095	0.083	0.232	0.191	0.092	0.126	0.098	0.342	0.184	0.159	0.334	0.072	0.248	0.121	0.091	0.184	0.152	0.072	0.49	0.682	0.151	0.143	0.095	0.509	0.384	0.046	0.056	0.088	0.168	0.104	0.724	0.071	0.677	0.054	0.197	0.087	0.084	0.812	0.514	0.164
cg04028450	0.387	0.493	0.562	0.768	0.302	0.429	0.69	0.798	0.172	0.723	0.494	0.744	0.757	0.448	0.834	0.738	0.619	0.712	0.64	0.694	0.313	0.676	0.663	0.255	0.706	0.457	0.655	0.808	0.739	0.349	0.651	0.344	0.461	0.828	0.35	0.751	0.366	0.656	0.735	0.469	0.598	0.791	0.142	0.518	0.321	0.612	0.776	0.726	0.403
cg24911388	0.511	0.485	0.688	0.779	0.485	0.788	0.844	0.84	0.124	0.366	0.682	0.71	0.75	0.648	0.885	0.75	0.725	0.612	0.917	0.842	0.792	0.71	0.808	0.723	0.72	0.691	0.802	0.928	0.893	0.692	0.606	0.347	0.801	0.871	0.84	0.848	0.796	0.714	0.642	0.888	0.65	0.761	0.185	0.525	0.314	0.799	0.87	0.898	0.647
cg08864083	null	null	null	null	null	null	null	null	null	null	null	null	null	null	null	null	null	null	null	null	null	null	null	null	null	null	null	null	null	null	null	null	null	null	null	null	null	null	null	null	null	null	null	null	null	null	null	null	null
cg06768079	0.949	0.979	0.983	0.983	0.985	0.982	0.982	0.973	0.967	0.961	0.984	0.961	0.981	0.976	0.982	0.975	0.958	0.981	0.981	0.976	0.987	0.969	0.973	0.985	0.979	0.98	0.982	0.982	0.98	0.983	0.982	0.981	0.982	0.984	0.965	0.974	0.98	0.976	0.956	0.988	0.984	0.976	0.98	0.666	0.978	0.984	0.981	0.985	0.983
cg17571992	0.775	0.957	0.957	0.923	0.954	0.802	0.948	0.952	0.943	0.952	0.957	0.945	0.946	0.936	0.883	0.933	0.946	0.946	0.961	0.942	0.959	0.96	0.922	0.959	0.953	0.951	0.949	0.956	0.958	0.938	0.948	0.958	0.954	0.961	0.964	0.95	0.942	0.945	0.954	0.92	0.941	0.937	0.924	0.924	0.942	0.968	0.958	0.954	0.957
cg10090386	0.419	0.453	0.587	0.796	0.833	0.861	0.565	0.845	0.139	0.769	0.587	0.323	0.923	0.798	0.83	0.658	0.501	0.798	0.915	0.817	0.803	0.481	0.465	0.822	0.805	0.639	0.807	0.847	0.85	0.937	0.593	0.333	0.893	0.67	0.584	0.341	0.845	0.651	0.306	0.9	0.6	0.904	0.136	0.556	0.606	0.845	0.91	0.924	0.562
cg05377754	null	null	null	null	null	null	null	null	null	null	null	null	null	null	null	null	null	null	null	null	null	null	null	null	null	null	null	null	null	null	null	null	null	null	null	null	null	null	null	null	null	null	null	null	null	null	null	null	null
cg09042448	0.368	null	0.222	0.318	0.317	null	0.495	0.336	0.279	0.251	0.444	0.404	0.277	0.576	0.699	0.451	0.42	0.591	0.722	0.177	0.297	0.437	0.645	0.521	0.305	0.208	0.227	0.393	0.821	0.654	0.259	null	0.551	0.39	0.534	0.503	0.358	0.392	0.374	0.742	0.328	0.38	0.373	0.307	0.315	null	0.375	0.752	0.401
cg18233786	0.072	0.042	0.111	0.056	0.041	0.05	0.064	0.052	0.036	0.092	0.057	0.106	0.066	0.047	0.065	0.077	0.198	0.46	0.096	0.048	0.037	0.026	0.076	0.042	0.039	0.047	0.057	0.051	0.327	0.087	0.045	0.087	0.055	0.032	0.041	0.054	0.033	0.058	0.055	0.473	0.089	0.044	0.046	0.061	0.041	0.048	0.031	0.359	0.072
cg22996912	0.038	0.057	0.077	0.038	0.026	0.03	0.082	0.053	0.027	0.044	0.056	0.115	0.031	0.045	0.077	0.033	0.12	0.484	0.044	0.026	0.047	0.029	0.068	0.047	0.034	0.044	0.048	0.05	0.064	0.035	0.044	0.147	0.057	0.032	0.03	0.038	0.036	0.055	0.047	0.124	0.069	0.041	0.028	0.067	0.037	0.038	0.038	0.158	0.046
cg03664800	0.019	0.024	0.022	0.022	0.027	0.027	0.028	0.023	0.022	0.03	0.026	0.028	0.02	0.021	0.025	0.017	0.023	0.226	0.025	0.021	0.021	0.018	0.032	0.024	0.026	0.024	0.017	0.02	0.025	0.022	0.026	0.029	0.029	0.026	0.026	0.022	0.022	0.026	0.026	0.03	0.033	0.023	0.02	0.036	0.025	0.03	0.025	0.023	0.028
cg00558156	0.086	0.106	0.159	0.083	0.088	0.103	0.158	0.104	0.043	0.249	0.141	0.751	0.053	0.187	0.163	0.065	0.583	0.517	0.053	0.122	0.071	0.066	0.155	0.076	0.087	0.074	0.159	0.181	0.04	0.042	0.106	0.125	0.107	0.044	0.062	0.109	0.074	0.173	0.07	0.103	0.163	0.125	0.065	0.128	0.098	0.082	0.064	0.073	0.102
cg25074071	0.02	0.016	0.024	0.019	0.014	0.021	0.033	0.017	0.012	0.139	0.014	0.46	0.019	0.088	0.021	0.013	0.309	0.352	0.016	0.034	0.016	0.014	0.032	0.02	0.017	0.017	0.017	0.025	0.013	0.02	0.022	0.018	0.02	0.017	0.015	0.021	0.021	0.034	0.019	0.02	0.022	0.023	0.014	0.021	0.019	0.015	0.014	0.017	0.017
cg07352539	0.022	0.019	0.024	0.019	0.018	0.023	0.026	0.018	0.014	0.019	0.022	0.031	0.031	0.021	0.025	0.018	0.021	0.026	0.023	0.023	0.025	0.017	0.025	0.033	0.024	0.02	0.024	0.025	0.017	0.022	0.03	0.032	0.023	0.027	0.019	0.014	0.027	0.019	0.021	0.022	0.02	0.024	0.017	0.03	0.026	0.019	0.019	0.02	0.026
cg26563553	0.021	0.025	0.028	0.044	0.018	0.026	0.033	0.023	0.017	0.024	0.026	0.05	0.05	0.024	0.028	0.018	0.025	0.023	0.027	0.028	0.031	0.025	0.037	0.036	0.022	0.039	0.039	0.025	0.022	0.03	0.032	0.042	0.026	0.033	0.033	0.02	0.029	0.014	0.02	0.036	0.042	0.028	0.029	0.034	0.035	0.022	0.025	0.027	0.026
cg26506507	0.032	0.027	0.034	0.029	0.033	0.032	0.033	0.032	0.022	0.019	0.031	0.052	0.032	0.027	0.034	0.027	0.041	0.044	0.031	0.028	0.025	0.023	0.048	0.03	0.029	0.023	0.027	0.024	0.021	0.038	0.039	0.034	0.034	0.033	0.026	0.023	0.039	0.031	0.024	0.034	0.033	0.034	0.024	0.029	0.027	0.025	0.024	0.025	0.041
cg02183676	0.108	0.136	0.146	0.087	0.097	0.133	0.123	0.12	0.072	0.085	0.146	0.114	0.081	0.081	0.15	0.075	0.109	0.258	0.096	0.094	0.075	0.055	0.168	0.097	0.076	0.088	0.118	0.143	0.078	0.078	0.112	0.104	0.144	0.086	0.072	0.075	0.097	0.131	0.088	0.108	0.135	0.151	0.071	0.155	0.109	0.116	0.051	0.083	0.125
cg13531748	0.221	0.148	0.194	0.188	0.189	0.18	0.348	0.242	0.077	0.117	0.228	0.188	0.129	0.12	0.292	0.091	0.219	0.313	0.155	0.258	0.066	0.054	0.313	0.147	0.175	0.146	0.156	0.356	0.1	0.241	0.194	0.134	0.294	0.08	0.084	0.135	0.158	0.261	0.105	0.222	0.2	0.363	0.054	0.227	0.169	0.164	0.09	0.115	0.22
cg05365729	0.195	0.184	0.158	0.152	0.16	0.238	0.301	0.483	0.095	0.346	0.198	0.313	0.141	0.122	0.189	0.13	0.251	0.186	0.181	0.246	0.15	0.109	0.241	0.138	0.177	0.174	0.238	0.3	0.098	0.438	0.217	0.174	0.298	0.124	0.123	0.158	0.182	0.239	0.159	0.33	0.216	0.395	0.086	0.297	0.145	0.189	0.222	0.149	0.207
cg04259752	0.394	0.286	0.378	0.393	0.294	0.331	0.587	0.772	0.144	0.257	0.379	0.547	0.264	0.248	0.475	0.243	0.51	0.427	0.501	0.618	0.258	0.174	0.449	0.362	0.329	0.32	0.413	0.686	0.388	0.719	0.441	0.32	0.628	0.227	0.192	0.365	0.442	0.474	0.251	0.709	0.36	0.707	0.125	0.425	0.268	0.305	0.617	0.554	0.334
cg00326251	null	null	null	null	null	null	null	null	null	null	null	null	null	null	null	null	null	null	null	null	null	null	null	null	null	null	null	null	null	null	null	null	null	null	null	null	null	null	null	null	null	null	null	null	null	null	null	null	null
cg01190934	null	null	null	null	null	null	null	null	null	null	null	null	null	null	null	null	null	null	null	null	null	null	null	null	null	null	null	null	null	null	null	null	null	null	null	null	null	null	null	null	null	null	null	null	null	null	null	null	null
cg11041161	0.038	0.028	0.025	0.031	0.026	0.021	0.046	0.021	0.021	0.023	0.018	0.036	0.037	0.031	0.026	0.043	0.038	0.034	0.032	0.025	0.026	0.014	0.041	0.022	0.029	0.018	0.026	0.021	0.027	0.025	0.039	0.036	0.034	0.033	0.029	0.019	0.035	0.026	0.026	0.03	0.022	0.05	0.025	0.022	0.023	0.025	0.032	0.028	0.032
cg00172085	null	null	null	null	null	null	null	null	null	null	null	null	null	null	null	null	null	null	null	null	null	null	null	null	null	null	null	null	null	null	null	null	null	null	null	null	null	null	null	null	null	null	null	null	null	null	null	null	null
cg13216124	0.732	0.917	0.889	0.898	0.913	0.91	0.91	0.836	0.912	0.923	0.929	0.808	0.827	0.84	0.88	0.569	0.921	0.81	0.915	0.889	0.918	0.906	0.868	0.91	0.894	0.937	0.898	0.907	0.902	0.885	0.886	0.874	0.871	0.897	0.921	0.842	0.854	0.852	0.721	0.918	0.901	0.722	0.874	0.911	0.858	0.908	0.901	0.914	0.921
expression	13.436	13.531	13.686	13.919	13.954	14.032	14.056	14.239	14.25	14.365	14.371	14.414	14.417	14.524	14.574	14.6	14.611	14.631	14.656	14.674	14.686	14.764	14.767	14.77	14.793	14.821	14.869	14.876	14.895	14.926	14.955	14.972	14.994	15.018	15.057	15.062	15.109	15.137	15.149	15.151	15.179	15.188	15.208	15.213	15.226	15.237	15.251	15.253	15.27
[truncated: 206 more columns]

## Sheet: Table S5
TCGA barcode	CLIN:vital_status	CLIN:days_to_last_known_alive	CLIN:days_to_death
TCGA-EK-A2RN-01A	Alive	3	NA
TCGA-EK-A2RA-01A	Alive	1246	NA
TCGA-EK-A2PG-01A	Alive	46	NA
TCGA-EK-A2RK-01A	Alive	0	NA
TCGA-EK-A2RB-01A	Alive	2	NA
TCGA-EX-A69M-01A	Dead	253	253
TCGA-LP-A5U3-01A	Alive	25	NA
TCGA-DR-A0ZL-01A	Alive	2669	NA
TCGA-C5-A7UE-01A	Alive	4738	NA
TCGA-IR-A3LI-01A	Alive	2493	NA
TCGA-JW-A5VJ-01A	Alive	652	NA
TCGA-IR-A3LL-01A	Alive	1106	NA
TCGA-DG-A2KH-01A	Alive	34	NA
TCGA-LP-A5U2-01A	Alive	9	NA
TCGA-C5-A2LY-01A	Alive	2383	NA
TCGA-C5-A1BL-01A	Alive	5271	NA
TCGA-EA-A3HR-01A	Alive	940	NA
TCGA-DS-A0VL-01A	Dead	1692	1692
TCGA-EK-A3GJ-01A	Alive	3	NA
TCGA-FU-A3EO-01A	Alive	66	NA
TCGA-DR-A0ZM-01A	Alive	1791	NA
TCGA-EA-A44S-01A	Alive	385	NA
TCGA-EX-A1H6-01B	Alive	241	NA
TCGA-FU-A23L-01A	Alive	725	NA
TCGA-IR-A3LK-01A	Dead	908	908
TCGA-C5-A1BK-01B	Alive	5385	NA
TCGA-EK-A2PL-01A	Alive	13	NA
TCGA-C5-A1ME-01A	Alive	1756	NA
TCGA-EA-A1QT-01A	Alive	376	NA
TCGA-JX-A3Q0-01A	Alive	5957	NA
TCGA-IR-A3L7-01A	Alive	4483	NA
TCGA-C5-A1BM-01A	Dead	2520	2520
TCGA-Q1-A6DV-01A	Alive	491	NA
TCGA-Q1-A73Q-01A	Alive	284	NA
TCGA-C5-A7CG-01A	Alive	6408	NA
TCGA-Q1-A5R2-01A	Alive	499	NA
TCGA-C5-A2LZ-01A	Dead	3046	3046
TCGA-EK-A2PM-01A	Alive	18	NA
TCGA-EA-A5O9-01A	Alive	423	NA
TCGA-C5-A1BE-01B	Dead	2094	2094
TCGA-C5-A3HL-01A	Alive	621	NA
TCGA-Q1-A5R1-01A	Alive	474	NA
TCGA-C5-A2LS-01A	Alive	1345	NA
TCGA-JX-A5QV-01A	Alive	243	NA
TCGA-HM-A4S6-01A	Alive	454	NA
TCGA-C5-A1BQ-01C	Dead	604	604
TCGA-EK-A2RL-01A	Dead	1453	1453
TCGA-RA-A741-01A	Alive	118	NA
TCGA-JW-A5VL-01A	Alive	474	NA
TCGA-C5-A1M8-01A	Alive	919	NA
TCGA-MY-A5BE-01A	Alive	1066	NA
TCGA-JW-A5VK-01A	Alive	623	NA
TCGA-EA-A3QE-01A	Alive	761	NA
TCGA-EA-A6QX-01A	Alive	413	NA
TCGA-EX-A1H5-01A	Alive	619	NA
TCGA-C5-A2M1-01A	Alive	1169	NA
TCGA-R2-A69V-01A	Alive	596	NA
TCGA-LP-A7HU-01A	Alive	406	NA
TCGA-EA-A5ZD-01A	Alive	457	NA
TCGA-IR-A3LC-01A	Alive	3571	NA
TCGA-FU-A3NI-01A	Alive	44	NA
TCGA-EK-A3GN-01A	Alive	1	NA
TCGA-EK-A2R7-01A	Alive	18	NA
TCGA-BI-A20A-01A	Alive	720	NA
TCGA-DG-A2KJ-01A	Alive	1791	NA
TCGA-DS-A5RQ-01A	Alive	512	NA
TCGA-FU-A5XV-01A	Alive	60	NA
TCGA-BI-A0VR-01A	Alive	1505	NA
TCGA-MY-A5BF-01A	Alive	634	NA
TCGA-EK-A3GK-01A	Alive	3	NA
TCGA-EA-A5FO-01A	Alive	815	NA
TCGA-EA-A3HQ-01A	Alive	1136	NA
TCGA-EK-A2PI-01A	Alive	586	NA
TCGA-Q1-A73P-01A	Alive	483	NA
TCGA-DG-A2KM-01A	Alive	1218	NA
TCGA-C5-A1M5-01A	Dead	2052	2052
TCGA-FU-A3WB-01A	Alive	25	NA
TCGA-C5-A1MF-01A	Alive	1617	NA
TCGA-IR-A3LA-01A	Alive	4172	NA
TCGA-C5-A1BI-01B	Alive	1112	NA
TCGA-IR-A3LF-01A	Alive	2949	NA
TCGA-FU-A40J-01A	Alive	41	NA
TCGA-Q1-A5R3-01A	Alive	485	NA
TCGA-EA-A3QD-01A	Alive	397	NA
TCGA-EA-A3HU-01A	Alive	1013	NA
TCGA-C5-A2LX-01A	Alive	2526	NA
TCGA-HG-A2PA-01A	Dead	773	773
TCGA-C5-A3HE-01A	Alive	548	NA
TCGA-EA-A78R-01A	Alive	410	NA
TCGA-FU-A2QG-01A	Alive	28	NA
TCGA-EK-A2GZ-01A	Alive	383	NA
TCGA-MU-A51Y-01A	Alive	422	NA
TCGA-DS-A0VK-01A	Dead	1118	1118
TCGA-C5-A1MH-01A	Dead	1186	1186
TCGA-C5-A1M7-01A	Alive	1409	NA
TCGA-C5-A1MI-01A	Dead	1083	1083
TCGA-EA-A5ZE-01A	Alive	456	NA
TCGA-Q1-A73S-01A	Alive	589	NA
TCGA-EK-A2RC-01A	Alive	123	NA
TCGA-FU-A23K-01A	Alive	37	NA
TCGA-EA-A556-01A	Alive	453	NA
TCGA-EA-A50E-01A	Dead	227	227
TCGA-FU-A3TX-01A	Alive	45	NA
TCGA-FU-A3YQ-01A	Alive	107	NA
TCGA-Q1-A6DW-01A	Alive	534	NA
TCGA-C5-A1BJ-01A	Alive	4385	NA
TCGA-DS-A3LQ-01A	Alive	699	NA
TCGA-FU-A3TQ-01A	Alive	48	NA
TCGA-FU-A770-01A	Alive	34	NA
TCGA-HM-A6W2-01A	Alive	287	NA
TCGA-EK-A2H0-01A	Alive	1398	NA
TCGA-EK-A2IP-01A	Alive	202	NA
TCGA-JW-A5VI-01A	Alive	747	NA
TCGA-C5-A2M2-01A	Dead	1011	1011
TCGA-MU-A5YI-01A	Alive	1053	NA
TCGA-MY-A5BD-01A	Alive	1667	NA
TCGA-LP-A4AV-01A	Alive	0	NA
TCGA-C5-A3HF-01A	Dead	543	543
TCGA-EX-A69L-01A	Alive	602	NA
TCGA-EK-A2RO-01A	Alive	2	NA
TCGA-HM-A3JJ-01A	Dead	659	659
TCGA-C5-A1MN-01A	Dead	1245	1245
TCGA-C5-A1M6-01A	Dead	955	955
TCGA-EA-A5ZF-01A	Alive	455	NA
TCGA-EA-A4BA-01A	Alive	390	NA
TCGA-IR-A3LB-01A	Dead	2032	2032
TCGA-Q1-A6DT-01A	Dead	275	275
TCGA-C5-A1MP-01A	Alive	109	NA
TCGA-C5-A3HD-01B	Alive	1582	NA
TCGA-DS-A0VN-01A	Alive	2910	NA
TCGA-DG-A2KK-01A	Alive	1544	NA
TCGA-C5-A1MK-01A	Dead	74	74
TCGA-C5-A7CJ-01A	Dead	3097	3097
TCGA-JW-A5VG-01A	Alive	834	NA
TCGA-Q1-A73O-01A	Alive	428	NA
TCGA-Q1-A73R-01A	Alive	468	NA
TCGA-EK-A2RE-01A	Alive	11	NA
TCGA-C5-A1ML-01A	Dead	636	636
TCGA-EK-A2PK-01A	Alive	0	NA
TCGA-EK-A2R9-01A	Alive	4	NA
TCGA-C5-A7CM-01A	Alive	619	NA
TCGA-JX-A3Q8-01A	Alive	922	NA
TCGA-C5-A7CH-01A	Alive	4694	NA
TCGA-JW-A69B-01A	Alive	863	NA
TCGA-EA-A3HT-01A	Alive	954	NA
TCGA-C5-A7CK-01A	Dead	4086	4086
TCGA-C5-A1BN-01B	Dead	166	166
TCGA-HM-A3JK-01A	Alive	632	NA
TCGA-DS-A0VM-01A	Alive	2128	NA
TCGA-EA-A411-01A	Alive	747	NA
TCGA-C5-A1MJ-01A	Dead	14	14
TCGA-DG-A2KL-01A	Alive	1367	NA
TCGA-EA-A43B-01A	Alive	791	NA
TCGA-FU-A3HY-01A	Alive	954	NA
TCGA-C5-A2LT-01A	Alive	2226	NA
TCGA-EK-A2RM-01A	Alive	68	NA
TCGA-EA-A3Y4-01A	Alive	441	NA
TCGA-EA-A410-01A	Alive	803	NA
TCGA-C5-A7CL-01A	Dead	471	471
TCGA-EA-A439-01A	Alive	441	NA
TCGA-FU-A57G-01A	Alive	40	NA
TCGA-EA-A1QS-01A	Alive	1203	NA
TCGA-C5-A0TN-01A	Dead	348	348
TCGA-EK-A2RJ-01A	Alive	36	NA
TCGA-JX-A3PZ-01A	Dead	642	642
TCGA-LP-A4AU-01A	Alive	343	NA
TCGA-BI-A0VS-01A	Alive	1735	NA
TCGA-C5-A1M9-01A	Dead	1065	1065
TCGA-IR-A3LH-01A	Alive	2394	NA
TCGA-C5-A2LV-01A	Alive	2234	NA
TCGA-EK-A2H1-01A	Alive	799	NA
TCGA-LP-A4AX-01A	Alive	380	NA
TCGA-C5-A1BF-01B	Dead	570	570
TCGA-JW-A5VH-01A	Dead	100	100
TCGA-EX-A3L1-01A	Alive	463	NA
TCGA-EK-A2R8-01A	Alive	44	NA

## Sheet: Table S6
TCGA barcode	-Sequenced	PIK3CA	MUC4	KMT2C	KMT2D	EP300	FBXW7	LRP2	NAV3	ZFHX3	CREBBP	HLA-A	ARID1A	PTEN	LRP1B	WIZ	ATRX	MALAT1	PRKDC	TRRAP	FAT1	FAT3	MTOR	MXRA5	NFE2L2	SPEN	TSC2	BRWD3	CHD4	DLC1	NOTCH1	POLQ	PTPRD	ATM	ERBB2	ERBB3	HLA-B	KRAS	MED1	MGA	NSD1	SMARCA4	ABL1	AR	DIDO1	MED12	NBPF1	NOTCH3	PTPRC
TCGA-BI-A0VR-01A	Exome													p.Q214*													p.I247
TCGA-BI-A0VS-01A	Exome			p.R284*
TCGA-BI-A20A-01A	Exome																											p.G1710																		p.S402Y
TCGA-C5-A0TN-01A	Exome																e29-1																								p.V425F
TCGA-C5-A1BE-01B	Exome	p.E726K	p.T2116,p.D1029
TCGA-C5-A1BF-01B	Exome											p.E113*						NULL			p.H2508fs,p.S541*										p.H2018fs
TCGA-C5-A1BI-01B	Exome																												p.F181											p.E344K
TCGA-C5-A1BJ-01A	Exome	p.E545Q,p.E600K		p.E3845K			p.R479P				p.P225L																										p.N104K		p.Q519*
TCGA-C5-A1BK-01B	Exome																							p.Q1813H
TCGA-C5-A1BL-01A	Exome			p.E4678*															p.Q3568E,p.Q1610H		p.F2579			p.E2426K	p.E380Q,p.E166*
TCGA-C5-A1BM-01A	Exome	p.E542K			p.L3631,p.Q3580*				p.F717L					p.Y65*									p.D2191H				p.F1666L
TCGA-C5-A1BN-01B	Exome																p.E625Q															p.P2320T								p.T510I
TCGA-C5-A1BQ-01C	Exome	p.E545K	p.F5318,p.S2344L,p.R917T	p.S2025*,p.Q1875*	p.D5462H,p.Q3988*			p.V488	p.S777	p.D982N		p.E113*		p.Q171*						p.G3258A		p.Q4588E		p.L884V			p.L45					p.D67H			p.E238K					p.L179			p.I195					p.E962K
TCGA-C5-A1M5-01A	Exome
TCGA-C5-A1M6-01A	Exome																																														NULL
TCGA-C5-A1M7-01A	Exome																																													p.F1110L
TCGA-C5-A1M8-01A	Exome		p.L1857V												p.S4342N
TCGA-C5-A1M9-01A	Exome						p.D600N						p.G2087R			p.R352Q
TCGA-C5-A1ME-01A	Exome																																					p.G12D
TCGA-C5-A1MF-01A	Exome																														p.C1561Y														p.D691H		NULL
TCGA-C5-A1MH-01A	Exome	p.E545K,p.E726K				p.S401*																			p.E49fs			p.S264L						p.E632K
TCGA-C5-A1MI-01A	Exome												p.Q1363*														p.V560									p.V104M						p.R973W
TCGA-C5-A1MJ-01A	Exome																																		p.S310F	p.G592E
TCGA-C5-A1MK-01A	Exome	p.E545K							p.S1765L				p.Q611*,p.Q1424*		p.L3101							p.D2649N												p.R1437K
TCGA-C5-A1ML-01A	Exome	p.E545K	p.S3434		p.R4282*,p.Q2380*		p.R658																														p.N104K
TCGA-C5-A1MN-01A	Exome				p.K1711*																				p.D29H						p.W1487C,p.E1408D,p.E1408K,p.E1182Q													p.E323K
TCGA-C5-A1MP-01A	Exome
TCGA-C5-A2LS-01A	Exome
TCGA-C5-A2LT-01A	Exome
TCGA-C5-A2LV-01A	Exome
TCGA-C5-A2LX-01A	Exome		p.T4046S								p.P1488R				p.C2479R														p.E1657K	p.S586			p.Q1218R
TCGA-C5-A2LY-01A	Exome
TCGA-C5-A2LZ-01A	Exome		p.S1576L	p.Q2985*,p.S1148*	p.Q1402*						p.Q2140					p.R882Q				p.E2879*	p.D919N											p.F2426L	p.L1053F								p.P565A,p.E1270
TCGA-C5-A2M1-01A	Exome	p.E545K																																				p.A146T
TCGA-C5-A2M2-01A	Exome		p.D4846																															p.G449W		p.I950T
TCGA-C5-A3HD-01B	Exome		p.L3553V									p.E201*																																					p.S705*
TCGA-C5-A3HE-01A	Exome	p.E545K			p.Q4347*					p.S383						p.A676T			p.Q1897																							NULL
TCGA-C5-A3HF-01A	Exome																																					p.G13D
TCGA-C5-A3HL-01A	Exome		p.P4034H	p.Q3245*					p.S777			p.E277Q		p.N323fs																			p.R1674C
TCGA-C5-A7CG-01A	Exome					p.D1399N	p.R224*								p.G1413						p.L1427fs
TCGA-C5-A7CH-01A	Exome			p.E4171K				p.P992S										NULL																								p.R549C
TCGA-C5-A7CJ-01A	Exome	p.E542K																																													NULL
TCGA-C5-A7CK-01A	Exome								p.Q1649H																																							p.P877S
TCGA-C5-A7CL-01A	Exome													p.S229*	p.N554S
TCGA-C5-A7CM-01A	Exome																																										p.E46V				NULL
TCGA-C5-A7UE-01A	Exome		p.L3969F																																							p.L567
TCGA-DG-A2KH-01A	Exome
TCGA-DG-A2KJ-01A	Exome
TCGA-DG-A2KK-01A	Exome	p.E545K		p.S773L	p.P3393		p.R505C																															p.G13D						p.Q488*
TCGA-DG-A2KL-01A	Exome	p.E542K															p.R498T						p.L2261			p.E1873,p.P2004				p.R235Q
TCGA-DG-A2KM-01A	Exome							p.H3078D			p.I1471M												p.M1467I							p.S300*
TCGA-DR-A0ZL-01A	Exome
TCGA-DR-A0ZM-01A	Exome			p.S3690*,p.P3341T,p.S1148*	p.Q4284*			p.L2170			p.L213F	p.E43*													p.R515T	p.S1724*,p.E2113Q,p.S3035*,p.I3108M				p.Q739	p.V1676,p.L64								p.S1049C
TCGA-DS-A0VK-01A	Exome				p.R5086Q			p.H3919Q											p.R820W						p.E82D						p.R1523C
TCGA-DS-A0VL-01A	Exome																	NULL	NULL			p.R258C,p.I1058																	p.R22Q
TCGA-DS-A0VM-01A	Exome			p.Q1186*						p.L3668														p.S2382F	p.D29H			p.W975*											p.E441K
TCGA-DS-A0VN-01A	Exome						p.Y519*																			p.D1164N				p.L459F															p.L48
TCGA-DS-A3LQ-01A	Exome																										p.P632S
TCGA-DS-A5RQ-01A	Exome	p.E545K																						p.L1856										p.M3011fs											p.S2229
TCGA-EA-A1QS-01A	Exome																				p.S2450*
TCGA-EA-A1QT-01A	Exome										p.D1543H																														p.S1679*		p.K473in_frame_del
TCGA-EA-A3HQ-01A	Exome				p.D2325N	p.R648*	p.R465C
TCGA-EA-A3HR-01A	Exome																				p.P3333fs																						p.R658*
TCGA-EA-A3HT-01A	Exome	p.E545K																NULL																					p.S434F
TCGA-EA-A3HU-01A	Exome			p.Q203		p.A627V			p.R1663H	p.S3654,p.A2585						p.P255A			p.P1730S			p.K110T				p.R806fs						p.S1617fs	p.V1596F,p.W1440C	p.L1125F							p.E1703Q	p.S492							p.E804D
TCGA-EA-A3QD-01A	Exome					p.R1312Q					p.P1759							NULL
TCGA-EA-A3QE-01A	Exome	p.H1047R	p.V3993A				p.R465C					p.F32fs																			p.S1651L				p.T1242
TCGA-EA-A3Y4-01A	Exome																					p.S601L			p.F481														p.Q1066*
TCGA-EA-A410-01A	Exome									p.G1926fs
TCGA-EA-A411-01A	Exome																																			p.E332Q
TCGA-EA-A439-01A	Exome				p.P3191fs				p.R1612Q	p.E122							p.L157																												p.E2043K
TCGA-EA-A43B-01A	Exome													NULL													p.P378T
TCGA-EA-A44S-01A	Exome																																									p.A778P	p.P918L
TCGA-EA-A4BA-01A	Exome	p.K111E											p.Y485fs,p.Q510*	p.R130Q															e7+1									p.G12V
TCGA-EA-A50E-01A	Exome	p.E545K	p.S4801L				p.W321*										p.V2345M													p.I1402
TCGA-EA-A556-01A	Exome													p.Y68fs									p.R1080P						p.N993T
TCGA-EA-A5FO-01A	Exome	p.E545K												p.R233*																						p.V104M
TCGA-EA-A5O9-01A	Exome					p.D1399N														p.E2356K			p.L2280
TCGA-EA-A5ZD-01A	Exome																					p.D2079N																									NULL	p.R487*
TCGA-EA-A5ZE-01A	Exome		p.R5106W
TCGA-EA-A5ZF-01A	Exome
TCGA-EA-A6QX-01A	Exome				p.Q5248*			p.A2044T
TCGA-EA-A78R-01A	Exome																			p.G3007C	p.V3421																										NULL
TCGA-EK-A2GZ-01A	Exome
TCGA-EK-A2H0-01A	Exome							p.S2492F													p.S3560*									p.Q1184R																p.G450R
TCGA-EK-A2H1-01A	Exome
TCGA-EK-A2IP-01A	Exome														p.A3373S			NULL	p.F1813	p.D2150N		p.P3499S					p.L312
TCGA-EK-A2PG-01A	Exome	p.E545K		p.Q1072H				p.K2214N					p.Q1330in_frame_del			p.R1161Q					p.P393S							p.R54Q	p.E752D			p.S1231*,p.H417D									p.M1174I,p.L1218
TCGA-EK-A2PI-01A	Exome																								p.D77H
TCGA-EK-A2PK-01A	Exome
TCGA-EK-A2PL-01A	Exome						p.R479G					p.K210fs					p.N1763I												p.E1638K
TCGA-EK-A2PM-01A	Exome	p.E545K				p.R1283S		p.A2595S	NULL					e9-1		p.E481K						p.S670*																									NULL
TCGA-EK-A2R7-01A	Exome		p.S1079Y				p.D600H										p.H1805N
TCGA-EK-A2R8-01A	Exome					p.Q561*				p.F2701																												p.G12C
TCGA-EK-A2R9-01A	Exome																									p.V1040												p.G12V
TCGA-EK-A2RA-01A	Exome																NULL											p.D659																p.E898				p.I1820
TCGA-EK-A2RB-01A	Exome
TCGA-EK-A2RC-01A	Exome			p.Q1218*							p.R1319*													p.Y977*					p.K599N												p.S1679*					p.Q308E
TCGA-EK-A2RE-01A	Exome																																						p.S1524fs
TCGA-EK-A2RJ-01A	Exome																	NULL										p.L1188,p.S483L																					e17-1
TCGA-EK-A2RK-01A	Exome		p.L1697F	p.H4257fs	p.Q4007*	p.Q813*								NULL,p.D252N,p.D312N									p.L2280							p.F1515										p.E709K								p.G974R
TCGA-EK-A2RL-01A	Exome						p.R465L										p.T2267N			p.K1273N																		p.G12D
TCGA-EK-A2RM-01A	Exome		p.L3633V
TCGA-EK-A2RN-01A	Exome	p.E545K,p.E726K							p.R765C																		p.T1206
TCGA-EK-A2RO-01A	Exome	p.E545K	p.E2741fs																												p.C387Y																		p.V781in_frame_del
TCGA-EK-A3GJ-01A	Exome	p.E545K	p.S3528L,p.S2202F,p.L2129I,p.S2104*,p.S2056*,p.Q2045*,p.P2034S,p.S1912L,p.L1681V,p.S1624L	p.Q2220*																						p.R1056fs
TCGA-EK-A3GK-01A	Exome		p.*5413S,p.L5362,p.S1032L	p.L2420V		p.Q2215*	p.R505G			p.S417L	p.E1063*,p.E1058*				p.S4103C,p.D2968H				e63-1		p.L3408		p.E2419K			p.D1612Y,p.E1720Q					p.E294K	p.L2120V			p.E1079K	p.M677I								p.E541Q	e10+2
TCGA-EK-A3GN-01A	Exome						p.R367*
TCGA-EX-A1H5-01A	Exome		p.T1690fs			p.D1399N
TCGA-EX-A1H6-01B	Exome			p.R4846*	e27+1
TCGA-EX-A3L1-01A	Exome																																															p.K1705
TCGA-EX-A69L-01A	Exome											e4-1												p.E493K																p.L2792								p.R806*
TCGA-EX-A69M-01A	Exome
TCGA-FU-A23K-01A	Exome	p.V344G								p.Q2595*	p.P61L			e7-1										p.Q2406*
TCGA-FU-A23L-01A	Exome				p.Q3522																																							p.G689A
TCGA-FU-A2QG-01A	Exome						p.H500D																																		p.G625A,p.D643N,p.D644N,p.E673Q,p.K734R,p.S780,p.E844fs,p.E844,p.L864,p.E966
TCGA-FU-A3EO-01A	Exome																																					p.G12D
TCGA-FU-A3HY-01A	Exome	p.H1047L	p.S3863F			p.S1581L						p.L225
TCGA-FU-A3NI-01A	Exome					p.Q1719*										p.P603Q																			p.S310F
TCGA-FU-A3TQ-01A	Exome					e20+1								p.R15*																							e5-1									p.R621*
TCGA-FU-A3TX-01A	Exome										e20+1							NULL
TCGA-FU-A3WB-01A	Exome	p.E545K
TCGA-FU-A3YQ-01A	Exome																	NULL	p.L320V
TCGA-FU-A40J-01A	Exome		p.V1731							p.A3326T							NULL																		p.D769H
TCGA-FU-A57G-01A	Exome	p.Q546R					p.R479Q						p.Q457*			p.A425V																						p.G12D
TCGA-FU-A5XV-01A	Exome						p.R465H
TCGA-FU-A770-01A	Exome			p.D4272fs,p.R1292*														NULL														p.S114L
TCGA-HG-A2PA-01A	Exome	p.G106V			p.P1574L				p.S1260C																p.E79K																		p.R693Q
TCGA-HM-A3JJ-01A	Exome
TCGA-HM-A3JK-01A	Exome							p.E2984
TCGA-HM-A4S6-01A	Exome
TCGA-HM-A6W2-01A	Exome
TCGA-IR-A3L7-01A	Exome
TCGA-IR-A3LA-01A	Exome		p.T1727					p.G4490A,p.S4070*					p.E1017K				p.V1520,p.S692L		p.F1604										p.Q1703,p.V1700			p.Q1606*		p.R2419T								p.S446			p.E788K				p.D702H
TCGA-IR-A3LB-01A	Exome				p.L205I
TCGA-IR-A3LC-01A	Exome																											p.R1319S
TCGA-IR-A3LF-01A	Exome	p.E542K,p.G1007R							p.R787Q											p.A2951T								p.L260V		p.D63N					p.G660R,p.D873N
TCGA-IR-A3LH-01A	Exome	p.C90R	p.L2865V,p.P2258S,p.S2154C					p.D1301N	p.E126K			e6-1				p.S996F			p.Q3568E			p.G884R,p.D2110Y		p.S1383*	p.E79D			p.S199L								p.S1216F,p.L1231,p.L1235M	p.Q250*		p.R768Q,p.D725N,p.L604V,p.M508I					p.S117L		p.P336			p.I1018M
TCGA-IR-A3LI-01A	Exome	p.E545K																																	p.S310F											p.Q335*
TCGA-IR-A3LK-01A	Exome	p.Q75E	p.S2936L,p.H2557Y,p.S2552*,p.L2481F,p.S2359F,p.S2344*,p.H2109Y,p.S1911F,p.E504Q,p.D190H	p.E740K	p.L3248	p.S19*,p.S281*		p.P3882S,p.F3684	p.L616	p.Q1843H	p.S129L,p.S32L				p.G3981E	p.L847,p.I809,p.I807	NULL			p.E3383Q		p.S4112T				p.Q405H,p.D2521H	p.E1024K		e26-1						p.E401D		e5-1									NULL		p.*2322S
TCGA-IR-A3LL-01A	Exome		p.S3336L,p.S2904*,p.H2546Y		p.Q2337E,p.S2312*,p.R2068W,p.E1627K,p.Q1492,p.E1355K,p.D1345H,p.D1343N											p.S817C							p.E2526K	p.S2287F			p.S1653F						p.D885N	p.E1228K			e5-1											p.P2008
TCGA-JW-A5VG-01A	Exome																																p.G757D	p.Q1919*
TCGA-JW-A5VH-01A	Exome	p.R38H											p.Q566*	e4+1						p.R3063Q																		p.I21R											p.S1153F
TCGA-JW-A5VI-01A	Exome																																				p.T19fs
TCGA-JW-A5VJ-01A	Exome	p.E545K					p.Q508*									p.G307R
TCGA-JW-A5VK-01A	Exome				p.H3037fs
TCGA-JW-A5VL-01A	Exome	p.E545K	p.S2968*,p.S2936L,p.L2897F,p.G2844D,p.L2721F,p.S2720F,p.S2552L,p.L1633V	p.M3299I	p.D5279Y			p.H596Y,p.D575H,p.S465F	p.R1249Q			p.D63H,p.S95*	p.D1337N		p.F507L	p.R828Q			p.E2489K,p.L770	p.D1849N			p.P2241S,p.W2239C,p.S2215F,p.L2186V,p.E447Q	p.T1459,p.L715	p.E471Q,p.D368H,p.L266F,p.E134Q	p.Y697*,p.S836*,p.E1125Q,p.E1174K,p.E1190Q,p.E1256K,p.E1271*,p.R1411I,p.D1413N,p.D1437H,p.M1495I,p.D1509N,p.D1510N,p.E1578Q	p.D1004N,p.T1070		p.D465N		p.D568N	p.M1035I	p.P421	p.S800F			p.Q111*			p.S572L	p.P121A		p.K626
TCGA-JW-A69B-01A	Exome	p.E542K
TCGA-JX-A3PZ-01A	Exome																																								p.S199L			p.Q734H
TCGA-JX-A3Q0-01A	Exome	p.E545K	p.S4160C,p.S1594,p.S1528L	p.Q2220*,p.Q2161*,p.K589N	p.L2761	p.P318A,p.Q741*,p.E2252*		p.L711	p.S1763F	p.E1283		e5-1	p.E896Q			p.E203K	p.M744I		p.R3788,p.T1699A		p.S4373F			p.S2720L	p.D29Y	p.E2260K	p.L1022,p.V1034	e21-1									p.E43*				p.L2299
TCGA-JX-A3Q8-01A	Exome
TCGA-JX-A5QV-01A	Exome
TCGA-LP-A4AU-01A	Exome																													p.S1466
TCGA-LP-A4AW-01A	Exome									p.L1418F											p.S1695*
TCGA-LP-A4AX-01A	Exome																																																p.K1145*
TCGA-LP-A5U2-01A	Exome		p.L2209V		p.Q1029*	p.S952*,e23-1																																	p.E533Q
TCGA-LP-A5U3-01A	Exome																																							p.Q172*
TCGA-LP-A7HU-01A	Exome	p.E542K,p.E545K								p.G919
TCGA-MU-A51Y-01A	Exome			p.Q2462*
TCGA-MU-A5YI-01A	Exome								p.D650E																			p.S1522L			p.C467Y		p.Q573K										p.P1037H		p.A1418E
TCGA-MY-A5BD-01A	Exome	p.E542K				p.V777I					p.S129*																																		p.E913K		NULL
TCGA-MY-A5BE-01A	Exome	p.E545K	p.S1800L			p.D1399N
TCGA-MY-A5BF-01A	Exome
TCGA-Q1-A5R1-01A	Exome	p.E545K	p.V4597,p.P4050H
TCGA-Q1-A5R2-01A	Exome			p.Q3312*	p.E4969*,p.E2433*,p.A1788T			p.L2134V		p.T1639A					p.E1259K																p.C1068Y														p.G1666S
TCGA-Q1-A5R3-01A	Exome	p.E542K																																			p.L150Q		e8+1
TCGA-Q1-A6DT-01A	Exome		p.I3382V												e26-1	p.S327L																	p.S725T												p.E1494Q
TCGA-Q1-A6DV-01A	Exome	p.G118D									e21+2																			p.K1281
TCGA-Q1-A6DW-01A	Exome		p.A2822T,p.N2533S	p.R2403*										p.R130Q	p.M4040I															NULL																		p.Q474*
TCGA-Q1-A73O-01A	Exome		p.S3289*,p.L1361V,p.P950A	p.S2338L,p.S1308*	e46-1		p.R658Q,p.Q277E		p.E1999Q	p.Q2991*	p.A1623	p.E201*	p.S1184L					NULL	p.L4106,p.S2965C	p.E127Q			p.L2431				p.L81		p.Q1781,p.P49A			p.E979K		p.P597A		p.G419A	p.E288*,p.E277*		p.Q1135H			p.R1633Q		p.R608Q
TCGA-Q1-A73P-01A	Exome	p.E542K																				p.D101Y										p.Q2215*								p.E808Q									p.D56N
TCGA-Q1-A73Q-01A	Exome
TCGA-Q1-A73R-01A	Exome				p.Q3905																															p.V104M
TCGA-Q1-A73S-01A	Exome																																									p.Y820*
TCGA-R2-A69V-01A	Exome	p.A399T																		p.R1681C
TCGA-RA-A741-01A	Exome		p.P3778S,p.P3410S,p.L3409F,p.S1832*,p.H1069Y,p.S877F,p.S439F,p.L274V,p.L101V															NULL						p.W316L																									p.L904F
[truncated: 2 more columns]

## Sheet: Table S7
Query	Statistic	P-value	FDR (BH)	Event_SD	Event_TD
A1BG	0.274371	0.000163924	0.00210684	184	184
A1CF	-0.0998855	0.177319	0.414757	184	114
A2BP1	-0.0462899	0.532652	0.757546	184	91
A2LD1	-0.0789452	0.286772	0.548072	184	184
A2ML1	-0.12117	0.101323	0.291979	184	175
A2M	0.265341	0.00027243	0.00319182	184	184
A4GALT	0.117496	0.112186	0.311131	184	184
A4GNT	0.051871	0.484371	0.723293	184	154
AAA1	0.00110696	0.988101	0.995103	184	130
AAAS	0.0267895	0.718116	0.872623	184	184
AACSL	0.0262359	0.723701	0.875133	184	146
AACS	-0.106189	0.151383	0.376168	184	184
AADACL2	-0.257695	0.000413121	0.00449743	184	127
AADACL3	0.04633	0.532297	0.757255	184	56
AADACL4	0.00187826	0.979812	0.99202	184	21
AADAC	-0.185812	0.0115591	0.0649193	184	180
AADAT	0.036401	0.623735	0.817926	184	183
AAGAB	-0.0562473	0.448226	0.695612	184	184
AAK1	0.160944	0.0290713	0.125937	184	184
AAMP	-0.271747	0.000190337	0.00238395	184	184
AANAT	0.021271	0.774418	0.900532	184	171
AARS2	-0.0666901	0.368405	0.629854	184	184
AARSD1	0.0158591	0.830804	0.927616	184	184
AARS	-0.0133735	0.857012	0.940253	184	184
AASDHPPT	-0.016638	0.822627	0.924486	184	184
AASDH	-0.00946272	0.898555	0.959477	184	184
AASS	-0.156743	0.0336015	0.139821	184	184
AATF	-0.0379083	0.609426	0.809995	184	184
AATK	-0.00132864	0.985719	0.993795	184	184
ABAT	-0.17256	0.0191621	0.0929984	184	184
ABCA10	-0.0894129	0.227429	0.481263	184	183
ABCA11P	-0.0147963	0.841989	0.933401	184	184
ABCA12	-0.078476	0.289655	0.551645	184	183
ABCA13	0.031702	0.669231	0.845078	184	184
ABCA17P	0.0131797	0.859062	0.940785	184	177
ABCA1	0.343618	1.79245e-06	4.32335e-05	184	184
ABCA2	0.0756122	0.307669	0.570106	184	184
ABCA3	0.0552477	0.456345	0.702222	184	184
ABCA4	0.00774622	0.916883	0.96682	184	181
ABCA5	-0.17236	0.0193041	0.0935253	184	184
ABCA6	0.111634	0.131382	0.34373	184	182
ABCA7	-0.0844875	0.254172	0.510983	184	184
ABCA8	-0.0480021	0.517588	0.747833	184	176
ABCA9	0.00116724	0.987454	0.994764	184	182
ABCB10	-0.141649	0.05511	0.19641	184	184
ABCB11	-0.131379	0.0754558	0.240799	184	127
ABCB1	0.0664748	0.369956	0.63122	184	184
ABCB4	0.162151	0.0278701	0.122182	184	184
ABCB5	0.028106	0.704892	0.864746	184	140
ABCB6	-0.0316243	0.669994	0.84562	184	184
ABCB7	-0.123733	0.0942503	0.278696	184	184
ABCB8	0.031957	0.666729	0.843939	184	184
ABCB9	0.089215	0.228463	0.482716	184	184
ABCC10	0.0206378	0.780961	0.90348	184	184
ABCC11	-0.13161	0.0749399	0.239594	184	176
ABCC12	-0.00576591	0.938082	0.974841	184	49
ABCC13	-0.126949	0.0859363	0.262913	184	113
ABCC1	-0.0468842	0.527399	0.754147	184	184
ABCC2	-0.155387	0.0351856	0.144472	184	184
ABCC3	-0.088733	0.230997	0.485169	184	184
ABCC4	0.28672	7.94949e-05	0.00114762	184	184
ABCC5	-0.129765	0.0791465	0.248637	184	184
ABCC6P1	-0.046592	0.529979	0.755515	184	141
ABCC6P2	-0.0166564	0.822435	0.924321	184	177
ABCC6	-0.060616	0.413709	0.669096	184	184
ABCC8	-0.0447014	0.546822	0.767776	184	111
ABCC9	0.420054	2.92156e-09	1.33424e-07	184	184
ABCD1	0.104129	0.159523	0.388489	184	184
ABCD2	0.0473672	0.523148	0.750901	184	182
ABCD3	-0.227849	0.00186678	0.0156263	184	184
ABCD4	0.0245114	0.741194	0.884758	184	184
ABCE1	0.0649781	0.380853	0.642034	184	184
ABCF1	0.0621356	0.402078	0.65939	184	184
ABCF2	0.0589074	0.427019	0.680177	184	184
ABCF3	-0.141632	0.0551401	0.196448	184	184
ABCG1	0.196003	0.00766432	0.0474222	184	184
ABCG2	-0.0322161	0.66419	0.842685	184	184
ABCG4	0.109155	0.140219	0.358149	184	183
ABCG5	-0.0501083	0.499361	0.735386	184	178
ABCG8	-0.0419121	0.572144	0.78564	184	133
ABHD10	0.0274875	0.711093	0.868439	184	184
ABHD11	-0.148548	0.0441729	0.169102	184	184
ABHD12B	-0.0343925	0.64302	0.828827	184	159
ABHD12	-0.0952638	0.198324	0.443263	184	184
ABHD13	-0.0323341	0.663036	0.842131	184	184
ABHD14A	-0.0101294	0.891451	0.955843	184	184
ABHD14B	-0.259387	0.000377157	0.00417612	184	184
ABHD15	-0.00980965	0.894857	0.957875	184	184
ABHD1	-0.0643955	0.385147	0.646351	184	179
ABHD2	-0.103552	0.161861	0.392191	184	184
ABHD3	-0.0388089	0.600947	0.804137	184	184
ABHD4	-0.0535716	0.470143	0.712091	184	184
ABHD5	-0.22485	0.0021505	0.0175207	184	184
ABHD6	-0.126117	0.0880268	0.266908	184	184
ABHD8	0.0475441	0.521596	0.749925	184	184
ABI1	-0.247626	0.000701473	0.00701473	184	184
ABI2	0.144191	0.0508443	0.18598	184	184
ABI3BP	0.0984182	0.183801	0.423833	184	184
ABI3	0.289222	6.83675e-05	0.00100652	184	184
ABL1	0.329544	4.92544e-06	0.000103764	184	184
ABL2	0.377643	1.25918e-07	4.01263e-06	184	184
ABLIM1	-0.418566	3.36435e-09	1.51246e-07	184	184
ABLIM2	-0.0748106	0.312841	0.575179	184	184
ABLIM3	-0.0124714	0.866564	0.944201	184	184
ABO	-0.0906163	0.221208	0.473698	184	182
ABP1	-0.111214	0.132847	0.346214	184	184
ABRA	0.00745515	0.919996	0.968316	184	163
ABR	-0.0777345	0.29425	0.556146	184	184
ABT1	-0.140891	0.0564375	0.199517	184	184
ABTB1	-0.0296196	0.689797	0.855925	184	184
ABTB2	0.0675867	0.361987	0.62392	184	184
ACAA1	-0.267651	0.000239625	0.00287607	184	184
ACAA2	0.0685376	0.355256	0.617143	184	184
ACACA	-0.126465	0.0871478	0.26521	184	184
ACACB	-0.0343148	0.643771	0.82937	184	184
ACAD10	-0.0769607	0.299097	0.561797	184	184
ACAD11	0.0846793	0.253091	0.509573	184	184
ACAD8	-0.165671	0.0246074	0.112252	184	184
ACAD9	-0.0954395	0.197493	0.44221	184	184
ACADL	-0.0950851	0.199171	0.444268	184	152
ACADM	-0.153807	0.0371113	0.149784	184	184
ACADSB	-0.230059	0.00167998	0.0143129	184	184
ACADS	-0.147184	0.0461773	0.174361	184	184
ACADVL	-0.155179	0.0354335	0.1451	184	184
ACAN	0.429186	1.21019e-09	5.94469e-08	184	184
ACAP1	0.100603	0.174212	0.410461	184	184
ACAP2	-0.17864	0.0152566	0.078827	184	184
ACAP3	-0.0567632	0.444067	0.692665	184	184
ACAT1	0.0577661	0.436045	0.686144	184	184
ACAT2	-0.116553	0.115118	0.315697	184	184
ACBD3	-0.113645	0.12453	0.332323	184	184
ACBD4	-0.144038	0.051094	0.186453	184	184
ACBD5	-0.217151	0.00306715	0.0231791	184	184
ACBD6	0.00898797	0.903619	0.960941	184	184
ACBD7	-0.0905688	0.221452	0.473946	184	184
ACCN1	0.178706	0.0152184	0.0786703	184	154
ACCN2	0.174845	0.0176029	0.0872135	184	184
ACCN3	-0.0266252	0.719771	0.873414	184	184
ACCN4	-0.0547756	0.460209	0.705588	184	164
ACCN5	-0.0751007	0.310963	0.573271	184	40
ACCSL	0.00244081	0.973768	0.989958	184	20
ACCS	0.061909	0.403801	0.660485	184	184
ACD	0.0729508	0.325056	0.587376	184	184
ACE2	-0.251973	0.000559585	0.0058123	184	184
ACER1	-0.300248	3.45856e-05	0.000558136	184	106
ACER2	-0.0160642	0.828649	0.926703	184	184
ACER3	0.0232721	0.753848	0.890626	184	184
ACE	0.120514	0.103201	0.295301	184	184
ACHE	-0.0226544	0.76018	0.893869	184	184
ACIN1	0.0628391	0.396761	0.654659	184	184
ACLY	0.00581313	0.937576	0.974655	184	184
ACMSD	-0.0527203	0.477237	0.717816	184	91
ACN9	-0.0264914	0.721121	0.873955	184	184
ACO1	0.0279758	0.706196	0.865496	184	184
ACO2	-0.0399045	0.590703	0.797263	184	184
ACOT11	-0.10767	0.145728	0.367007	184	184
ACOT12	0.0560697	0.449662	0.696899	184	27
ACOT13	-0.0933966	0.207302	0.455514	184	184
ACOT1	0.106305	0.150935	0.375288	184	184
ACOT2	0.0795066	0.283348	0.54466	184	184
ACOT4	0.0229783	0.756858	0.892311	184	184
ACOT6	0.132416	0.0731584	0.23601	184	136
ACOT7	0.178671	0.0152388	0.0787553	184	184
ACOT8	-0.0427194	0.564759	0.780542	184	184
ACOT9	0.310059	1.84212e-05	0.000324587	184	184
ACOX1	-0.230822	0.00161954	0.0138916	184	184
ACOX2	-0.00751516	0.919354	0.968157	184	184
ACOX3	-0.296005	4.51033e-05	0.00070091	184	184
ACOXL	0.0628656	0.396562	0.654598	184	176
ACP1	-0.0717449	0.333139	0.595175	184	184
ACP2	0.117472	0.112262	0.311223	184	184
ACP5	0.276393	0.000145937	0.00190979	184	184
ACP6	-0.177735	0.0157901	0.0807343	184	184
ACPL2	0.0302639	0.683409	0.852227	184	184
ACPP	-0.255927	0.000454056	0.00486937	184	184
ACPT	-0.00177681	0.980902	0.992044	184	90
ACRBP	-0.153474	0.0375284	0.150923	184	183
ACRC	-0.131131	0.0760138	0.242119	184	184
ACRV1	0.0308284	0.677831	0.849867	184	181
ACR	0.164057	0.0260603	0.116764	184	177
ACSBG1	0.0497989	0.502018	0.737518	184	184
ACSBG2	-0.0167148	0.821823	0.924204	184	169
ACSF2	-0.0437012	0.555839	0.774117	184	184
ACSF3	-0.0106966	0.885413	0.952525	184	184
ACSL1	0.0331582	0.654993	0.83622	184	184
ACSL3	-0.126482	0.0871038	0.265177	184	184
ACSL4	0.247286	0.000713834	0.0071101	184	184
ACSL5	-0.127223	0.085256	0.261667	184	184
ACSL6	-0.0616493	0.40578	0.661954	184	172
ACSM1	-0.192062	0.00900494	0.0535774	184	161
ACSM2A	0.0373565	0.614647	0.813037	184	59
ACSM2B	0.0588209	0.427699	0.680735	184	34
ACSM3	-0.148742	0.0438927	0.168188	184	184
ACSM4	0.013415	0.856573	0.939925	184	17
ACSM5	0.0376256	0.612098	0.811778	184	145
ACSS1	-0.115296	0.119115	0.322965	184	184
ACSS2	-0.254292	0.000495252	0.00523864	184	184
ACSS3	0.264807	0.00028057	0.00326818	184	183
ACTA1	-0.0142985	0.847239	0.936271	184	175
ACTA2	0.375193	1.54044e-07	4.78033e-06	184	184
ACTBL2	0.255597	0.000462116	0.00493459	184	163
ACTB	0.191818	0.00909465	0.0539446	184	184
ACTC1	0.132559	0.0728465	0.235343	184	178
ACTG1	-0.0498434	0.501635	0.737332	184	184
ACTG2	0.210739	0.00408611	0.0290075	184	184
ACTL6A	0.013121	0.859683	0.94098	184	184
ACTL6B	-0.0862435	0.244399	0.500609	184	23
ACTL7A	0.036803	0.619904	0.816455	184	81
ACTL7B	0.0785637	0.289114	0.551136	184	81
ACTL8	-0.0755009	0.308384	0.57085	184	165
ACTL9	0.0789972	0.286453	0.547775	184	18
ACTN1	0.443683	2.8272e-10	1.58606e-08	184	184
ACTN2	0.0324886	0.661525	0.841105	184	156
ACTN3	0.267971	0.000235384	0.00283531	184	124
ACTN4	-0.164019	0.0260956	0.116792	184	184
ACTR10	0.126108	0.0880506	0.266908	184	184
ACTR1A	-0.0282329	0.703622	0.8639	184	184
ACTR1B	-0.0446479	0.547303	0.767917	184	184
ACTR2	0.00959585	0.897136	0.958902	184	184
ACTR3B	-0.0226826	0.759891	0.893729	184	184
ACTR3C	-0.0616816	0.405533	0.661706	184	184
ACTR3	-0.0528214	0.476392	0.717241	184	184
ACTR5	-0.0335127	0.651545	0.833536	184	184
ACTR6	-0.137049	0.0635789	0.216443	184	184
ACTR8	-0.172558	0.019163	0.0929984	184	184
ACTRT1	0.00699141	0.924958	0.969974	184	35
ACTRT2	-0.024728	0.73899	0.883437	184	12
ACVR1B	-0.222881	0.0023576	0.0187676	184	184
ACVR1C	0.123284	0.0954593	0.281322	184	184
ACVR1	0.38389	7.4733e-08	2.50436e-06	184	184
ACVR2A	-0.196528	0.00749968	0.0465917	184	184
ACVR2B	0.0138778	0.851682	0.938048	184	184
ACVRL1	0.401715	1.58696e-08	6.13463e-07	184	184
ACY1	-0.131902	0.0742904	0.238374	184	184
ACY3	-0.10396	0.160207	0.389682	184	183
ACYP1	-0.0532506	0.47281	0.713901	184	184
ACYP2	-0.105139	0.155491	0.382367	184	184
ADAD1	-0.000487032	0.994765	0.997609	184	15
ADAD2	-0.0903954	0.222341	0.47471	184	153
ADAL	0.0535422	0.470386	0.712192	184	184
ADAM10	0.0768616	0.299722	0.562297	184	184
ADAM11	-0.0376168	0.612182	0.811793	184	184
ADAM12	0.651062	1.44908e-23	5.95602e-21	184	184
ADAM15	-0.183384	0.0127112	0.0693023	184	184
ADAM17	0.0626307	0.398332	0.656069	184	184
ADAM18	-0.0229772	0.756869	0.892311	184	29
ADAM19	0.604777	9.79741e-20	2.5626e-17	184	184
ADAM20	0.0262195	0.723867	0.875228	184	172
ADAM21P1	0.0572129	0.44046	0.689734	184	123
ADAM21	0.0566496	0.444981	0.693271	184	177
ADAM22	-0.0494739	0.504816	0.739417	184	182
ADAM23	0.0535602	0.470237	0.712127	184	184
ADAM28	-0.00264905	0.971531	0.988863	184	184
ADAM29	0.076835	0.299889	0.562414	184	54
ADAM2	0.0328339	0.658153	0.838618	184	17
ADAM30	-0.040134	0.588568	0.795426	184	55
ADAM32	0.0374811	0.613466	0.812522	184	179
ADAM33	0.128116	0.0830683	0.257029	184	184
ADAM3A	-0.0340899	0.645947	0.830344	184	10
ADAM5P	-0.0304067	0.681996	0.851524	184	31
ADAM6	-0.024463	0.741687	0.885093	184	184
ADAM7	-0.0149936	0.83991	0.932461	184	19
ADAM8	0.132581	0.0727999	0.235306	184	184
ADAM9	0.110118	0.136734	0.352647	184	184
ADAMDEC1	0.175081	0.0174486	0.0867047	184	184
ADAMTS10	0.470926	1.51766e-11	1.13206e-09	184	184
ADAMTS12	0.740241	3.3216e-33	5.57476e-30	184	184
ADAMTS13	0.0875306	0.237404	0.493071	184	184
ADAMTS14	0.57048	2.82299e-17	5.21606e-15	184	184
ADAMTS15	0.251263	0.000580792	0.00600778	184	183
ADAMTS16	0.439676	4.25488e-10	2.29741e-08	184	181
ADAMTS17	-0.033857	0.648203	0.831093	184	184
ADAMTS18	0.0966694	0.191753	0.434463	184	183
ADAMTS19	0.0799327	0.280767	0.541737	184	119
ADAMTS1	0.317032	1.16105e-05	0.000217118	184	184
ADAMTS20	0.0409751	0.580772	0.791139	184	133
ADAMTS2	0.69397	9.17025e-28	7.38755e-25	184	184
ADAMTS3	0.39367	3.23019e-08	1.17855e-06	184	184
ADAMTS4	0.567151	4.72577e-17	8.34886e-15	184	184
ADAMTS5	0.51916	4.3433e-14	4.97012e-12	184	184
ADAMTS6	0.391672	3.84252e-08	1.36971e-06	184	184
ADAMTS7	0.644886	5.13358e-23	1.91464e-20	184	184
ADAMTS8	0.0624565	0.399648	0.657215	184	182
ADAMTS9	0.180448	0.0142385	0.0751478	184	184
ADAMTSL1	0.184251	0.0122887	0.0677847	184	184
ADAMTSL2	0.350131	1.10387e-06	2.80353e-05	184	184
ADAMTSL3	0.0790502	0.286129	0.547468	184	184
ADAMTSL4	-0.0533246	0.472195	0.713554	184	184
ADAMTSL5	-0.0802365	0.278937	0.539611	184	184
ADAP1	-0.0315858	0.670372	0.845764	184	184
ADAP2	0.113376	0.125431	0.33362	184	184
ADARB1	0.233922	0.00139391	0.0123399	184	184
ADARB2	-0.0119802	0.871774	0.946906	184	170
ADAR	-0.136142	0.0653686	0.21964	184	184
ADAT1	0.0888016	0.230635	0.484779	184	184
ADAT2	-0.0501411	0.499081	0.735134	184	184
ADAT3	-0.0998601	0.17743	0.414773	184	184
ADA	0.136207	0.0652395	0.21964	184	184
ADCK1	-0.0945413	0.201764	0.447821	184	184
ADCK2	-0.0776757	0.294616	0.556431	184	184
ADCK4	-0.0288836	0.697122	0.860269	184	184
ADCK5	0.0467225	0.528826	0.754938	184	184
ADCY10	0.0516037	0.48663	0.725174	184	164
ADCY1	0.261477	0.000336758	0.00380814	184	184
ADCY2	0.223748	0.00226429	0.0182193	184	182
ADCY3	0.140374	0.0573578	0.202048	184	184
ADCY4	0.124941	0.0910537	0.272719	184	184
ADCY5	0.0162662	0.826529	0.925668	184	184
ADCY6	-0.114651	0.12121	0.326239	184	184
ADCY7	0.21297	0.00370136	0.0267729	184	184
ADCY8	0.102855	0.16472	0.396597	184	62
ADCY9	0.15528	0.0353136	0.144732	184	184
ADCYAP1R1	0.0835557	0.259466	0.516522	184	69
ADCYAP1	0.116474	0.115365	0.316211	184	174
ADC	0.343262	1.84005e-06	4.42755e-05	184	184
ADD1	-0.0339105	0.647684	0.830904	184	184
ADD2	0.0946964	0.201022	0.446813	184	181
ADD3	-0.08407	0.256535	0.513324	184	184
ADH1A	-0.205015	0.0052428	0.0351718	184	97
ADH1B	-0.252462	0.000545399	0.00569137	184	167
ADH1C	-0.2741	0.000166477	0.00213421	184	163
ADH4	-0.0981111	0.18518	0.425697	184	145
ADH5	-0.0247879	0.73838	0.883121	184	184
ADH6	-0.195031	0.00797735	0.048953	184	178
ADH7	-0.113241	0.125883	0.334555	184	157
ADHFE1	-0.0940421	0.204166	0.451262	184	181
ADI1	-0.217587	0.00300704	0.0227951	184	184
ADIG	0.00862278	0.907518	0.961651	184	14
ADIPOQ	-0.13158	0.075007	0.239703	184	55
ADIPOR1	-0.205954	0.00503494	0.0340052	184	184
ADIPOR2	-0.18301	0.0128975	0.0699961	184	184
ADK	-0.027457	0.7114	0.868708	184	184
ADM2	-0.149694	0.0425444	0.164415	184	184
ADM	0.155282	0.0353111	0.144732	184	184
ADNP2	0.0136103	0.854508	0.938712	184	184
ADNP	-0.0347521	0.639549	0.826205	184	184
ADORA1	0.363521	3.93568e-07	1.10844e-05	184	184
ADORA2A	0.217516	0.00301683	0.0228503	184	184
ADORA2B	0.0364162	0.62359	0.817916	184	184
ADORA3	0.25469	0.000484921	0.00514287	184	184
ADO	0.0314902	0.671312	0.846443	184	184
ADPGK	0.149221	0.0432097	0.16632	184	184
ADPRHL1	-0.183305	0.0127506	0.0693858	184	184
ADPRHL2	-0.0911995	0.218238	0.469746	184	184
ADPRH	0.186226	0.011372	0.0642268	184	184
ADRA1A	0.0231599	0.754997	0.891356	184	151
ADRA1B	0.373701	1.7402e-07	5.34261e-06	184	179
ADRA1D	0.200724	0.00629403	0.0405248	184	184
ADRA2A	0.0346164	0.640858	0.827209	184	184
ADRA2B	0.0464876	0.530902	0.756178	184	184
ADRA2C	0.204139	0.00544368	0.0362672	184	184
ADRB1	-0.127651	0.0842007	0.259529	184	182
ADRB2	0.0442403	0.55097	0.770148	184	184
ADRB3	0.186795	0.0111192	0.0630286	184	136
ADRBK1	-0.0466545	0.529426	0.755199	184	184
ADRBK2	0.163999	0.0261136	0.116821	184	184
ADRM1	0.0677227	0.36102	0.623206	184	184
ADSL	0.148762	0.0438641	0.168111	184	184
ADSSL1	-0.0539434	0.467062	0.710131	184	184
ADSS	-0.0115212	0.876647	0.948769	184	184
AEBP1	0.608293	5.27159e-20	1.45438e-17	184	184
AEBP2	-0.0641856	0.386701	0.647597	184	184
AEN	0.0806901	0.27622	0.535838	184	184
AES	-0.0673399	0.363746	0.625553	184	184
AFAP1L1	0.415264	4.59036e-09	2.00108e-07	184	184
AFAP1L2	0.293823	5.16195e-05	0.000789383	184	184
AFAP1	0.335243	3.29051e-06	7.33085e-05	184	184
AFARP1	0.109206	0.140035	0.3579	184	184
AFF1	-0.0521659	0.481888	0.72131	184	184
AFF2	-0.0393739	0.595655	0.800727	184	184
AFF3	0.0150482	0.839335	0.931926	184	184
AFF4	-0.0407613	0.582749	0.79227	184	184
AFG3L1	-0.0850199	0.251181	0.508012	184	184
AFG3L2	0.0254632	0.731522	0.879553	184	184
AFMID	-0.140116	0.0578232	0.202956	184	184
AFM	-0.0266173	0.719851	0.873414	184	16
AFP	0.141212	0.0558722	0.198138	184	78
AFTPH	-0.317924	1.09357e-05	0.000205453	184	184
AG2	0.403278	1.37919e-08	5.40408e-07	184	184
AGAP11	-0.223378	0.0023036	0.0184471	184	184
AGAP1	-0.101552	0.170165	0.404953	184	184
AGAP2	0.0960869	0.194456	0.437969	184	184
AGAP3	0.032437	0.66203	0.841641	184	184
AGAP4	-0.0820817	0.267994	0.526884	184	184
AGAP5	-0.0453936	0.540625	0.763603	184	184
AGAP6	-0.108012	0.144446	0.364921	184	184
AGAP7	-0.154766	0.0359324	0.146612	184	184
AGAP8	-0.0996335	0.17842	0.416142	184	184
AGA	-0.180296	0.014322	0.0754102	184	184
AGBL1	0.193931	0.00834514	0.0505837	184	105
AGBL2	-0.0111601	0.880484	0.950522	184	184
AGBL3	-0.0903667	0.222489	0.47471	184	178
AGBL4	-0.0341426	0.645437	0.830083	184	139
AGBL5	-0.0336806	0.649914	0.832386	184	184
AGER	-0.0217144	0.769846	0.898613	184	184
AGFG1	-0.064681	0.383039	0.643887	184	184
AGFG2	-0.366778	3.04073e-07	8.78626e-06	184	184
AGGF1	-0.130446	0.0775717	0.245451	184	184
AGK	0.0557249	0.452459	0.698793	184	184
AGL	-0.0724509	0.328391	0.590624	184	184
AGMAT	-0.0593979	0.423173	0.676878	184	184
AGPAT1	0.126903	0.0860498	0.26298	184	184
AGPAT2	-0.0217573	0.769404	0.898509	184	184
AGPAT3	-0.23015	0.00167265	0.0142622	184	184
AGPAT4	0.254015	0.000502553	0.0053075	184	184
AGPAT5	0.0095628	0.897488	0.958915	184	184
AGPAT6	0.0709311	0.338666	0.600923	184	184
AGPAT9	-0.303321	2.84607e-05	0.000474109	184	184
AGPHD1	-0.208707	0.00446745	0.0309829	184	184
AGPS	0.118528	0.109048	0.305838	184	184
AGR2	-0.150809	0.041009	0.160498	184	183
AGR3	-0.142807	0.0531315	0.191528	184	150
AGRN	0.22834	0.00182366	0.0153163	184	184
AGRP	0.000823945	0.991143	0.995933	184	123
AGTPBP1	-0.0443054	0.550384	0.769932	184	184
AGTR1	0.21831	0.00290969	0.0222395	184	170
AGTR2	-0.0175772	0.812794	0.919903	184	58
AGTRAP	0.1237	0.0943394	0.278909	184	184
AGT	0.0974913	0.187985	0.429351	184	184
AGXT2L1	-0.0880508	0.234617	0.489417	184	75
AGXT2L2	-0.0931012	0.208749	0.457626	184	184
AGXT2	0.0184442	0.803743	0.915804	184	35
AGXT	-0.00169922	0.981736	0.992429	184	116
AHCTF1	-0.0110134	0.882043	0.950982	184	184
AHCYL1	-0.117292	0.112816	0.311888	184	184
AHCYL2	-0.128426	0.08232	0.255554	184	184
AHCY	-0.070784	0.339671	0.601668	184	184
AHDC1	-0.104525	0.157932	0.386013	184	184
AHI1	-0.00182689	0.980364	0.99202	184	184
AHNAK2	0.0363747	0.623985	0.817994	184	184
AHNAK	-0.0165192	0.823874	0.924622	184	184
AHRR	0.0495347	0.504291	0.738918	184	184
AHR	0.249473	0.000637538	0.00649469	184	184
AHSA1	0.0951477	0.198874	0.443999	184	184
AHSA2	-0.0620278	0.402898	0.659704	184	184
AHSG	-0.00974745	0.89552	0.958128	184	150
AHSP	0.0862221	0.244517	0.500668	184	92
AICDA	-0.0519915	0.483356	0.72238	184	131
AIDA	0.134537	0.0686384	0.226731	184	184
AIF1L	-0.222889	0.00235669	0.0187676	184	184
AIF1	0.327746	5.58436e-06	0.000115471	184	184
AIFM1	-0.207147	0.00478151	0.0326994	184	184
AIFM2	-0.128863	0.0812722	0.253277	184	184
AIFM3	-0.0512608	0.489533	0.727831	184	184
AIG1	-0.0576709	0.436803	0.686639	184	184
AIM1L	-0.216691	0.00313188	0.0235534	184	184
AIM1	-0.315293	1.30416e-05	0.00024097	184	184
AIM2	0.0728403	0.325791	0.587934	184	183
AIMP1	-0.155464	0.0350936	0.144246	184	184
AIMP2	0.00141894	0.984748	0.993757	184	184
AIPL1	-0.0089102	0.904449	0.96098	184	97
AIP	0.0955004	0.197206	0.441928	184	184
AIRE	0.0439322	0.55375	0.772389	184	110
AJAP1	0.324398	7.04094e-06	0.000142231	184	183
AK1	0.00923979	0.900933	0.960346	184	184
AK2	0.00136565	0.985321	0.993795	184	184
AK3L1	0.0448922	0.545111	0.76655	184	184
AK3	-0.134476	0.0687645	0.226924	184	184
AK5	0.440852	3.77578e-10	2.06642e-08	184	182
AK7	-0.124777	0.0914842	0.273667	184	184
AKAP10	0.0531932	0.473289	0.714439	184	184
AKAP11	-0.0518564	0.484495	0.723293	184	184
AKAP12	0.307567	2.16638e-05	0.000373233	184	184
AKAP13	0.136717	0.0642308	0.21764	184	184
AKAP14	-0.1073	0.147128	0.369425	184	70
AKAP1	-0.154231	0.0365863	0.148498	184	184
AKAP2	0.302099	3.07622e-05	0.000506582	184	184
AKAP3	-0.115891	0.117209	0.319344	184	184
AKAP4	-0.031168	0.674482	0.84821	184	65
AKAP5	0.166213	0.0241352	0.1107	184	184
AKAP6	0.119373	0.10653	0.301155	184	184
AKAP7	-0.128192	0.0828833	0.256771	184	184
AKAP8L	-0.0755687	0.307948	0.570305	184	184
AKAP8	-0.0732703	0.322936	0.585044	184	184
AKAP9	-0.0461166	0.534189	0.758241	184	184
AKD1	-0.229143	0.00175523	0.0148593	184	184
AKIRIN1	0.00806971	0.913426	0.965071	184	184
AKIRIN2	-0.102498	0.166197	0.398858	184	184
AKNAD1	0.111324	0.132463	0.345487	184	161
AKNA	0.0718911	0.332152	0.594414	184	184
AKR1A1	-0.155724	0.0347859	0.143328	184	184
AKR1B10	-0.203055	0.00570175	0.0375395	184	183
AKR1B15	-0.00928318	0.90047	0.960188	184	154
AKR1B1	0.175238	0.0173461	0.086366	184	184
AKR1C1	-0.104755	0.157017	0.384664	184	184
AKR1C2	-0.163553	0.0265293	0.118129	184	183
AKR1C3	-0.238402	0.00111837	0.0103274	184	184
AKR1C4	-0.0921148	0.213633	0.464458	184	138
AKR1CL1	0.0333428	0.653196	0.834785	184	104
AKR1D1	0.0272948	0.71303	0.869665	184	96
AKR1E2	0.0429535	0.562626	0.779025	184	182
AKR7A2	-0.136147	0.0653601	0.21964	184	184
AKR7A3	-0.125196	0.090392	0.271716	184	184
AKR7L	-0.1155	0.11846	0.321751	184	184
AKT1S1	-0.0889125	0.230051	0.484191	184	184
AKT1	0.132395	0.0732053	0.236066	184	184
AKT2	-0.173372	0.0185949	0.0910337	184	184
AKT3	0.377521	1.27189e-07	4.04673e-06	184	184
AKTIP	-0.176249	0.0167005	0.0840448	184	184
ALAD	-0.178607	0.0152761	0.0789074	184	184
ALAS1	-0.251377	0.000577344	0.00597518	184	184
ALAS2	0.0873538	0.238357	0.494286	184	139
ALB	0.00648806	0.930346	0.971694	184	132
ALCAM	0.130924	0.0764835	0.243153	184	184
ALDH16A1	-0.0557657	0.452127	0.698727	184	184
ALDH18A1	-0.0975206	0.187852	0.429145	184	184
ALDH1A1	-0.239262	0.00107156	0.0099636	184	184
ALDH1A2	-0.0215335	0.77171	0.899446	184	181
ALDH1A3	0.0948612	0.200235	0.445863	184	184
ALDH1B1	0.285303	8.65247e-05	0.00123414	184	184
ALDH1L1	-0.133137	0.0715955	0.232683	184	178
ALDH1L2	0.402747	1.44666e-08	5.61383e-07	184	184
ALDH2	-0.2352	0.0013096	0.0117724	184	184
ALDH3A1	-0.206541	0.00490886	0.0333438	184	184
ALDH3A2	-0.24555	0.000780311	0.00762887	184	184
ALDH3B1	-0.106798	0.149037	0.372409	184	184
ALDH3B2	-0.0800314	0.280172	0.54095	184	183
ALDH4A1	-0.0727696	0.326263	0.588268	184	184
ALDH5A1	-0.171976	0.0195792	0.094517	184	184
ALDH6A1	-0.167891	0.0227234	0.105888	184	184
ALDH7A1	-0.110498	0.135378	0.350316	184	184
ALDH8A1	-0.0836244	0.259073	0.515944	184	184
ALDH9A1	-0.400238	1.81062e-08	6.93267e-07	184	184
ALDOA	0.0114825	0.877058	0.948913	184	184
ALDOB	-0.118714	0.108489	0.304524	184	176
ALDOC	0.0159333	0.830024	0.927416	184	184
ALG10B	0.129661	0.0793911	0.249095	184	184
ALG10	0.0227022	0.759689	0.893729	184	184
ALG11	0.00882479	0.905361	0.961256	184	184
ALG12	0.109807	0.137852	0.354395	184	184
ALG13	-0.125029	0.0908253	0.272429	184	184
ALG14	-0.0495829	0.503876	0.73858	184	184
ALG1L2	-0.00472193	0.949277	0.979478	184	95
ALG1L	-0.000543467	0.994158	0.997327	184	181
ALG1	0.0117771	0.87393	0.947459	184	184
ALG2	0.136135	0.0653835	0.219654	184	184
ALG3	-0.0556134	0.453366	0.699595	184	184
ALG5	-0.0249553	0.736679	0.882402	184	184
ALG6	-0.206123	0.00499828	0.0338257	184	184
ALG8	-0.00557849	0.940091	0.975598	184	184
ALG9	-0.121797	0.0995566	0.288541	184	184
ALKBH1	0.0283335	0.702616	0.863584	184	184
ALKBH2	-0.107521	0.14629	0.367918	184	184
ALKBH3	0.0587522	0.42824	0.681206	184	184
ALKBH4	-0.034079	0.646052	0.830344	184	184
ALKBH5	0.188235	0.0105015	0.0602371	184	184
ALKBH6	-0.020358	0.783857	0.905315	184	184
ALKBH7	-0.112876	0.127117	0.336682	184	184
ALKBH8	0.0915217	0.216609	0.468331	184	184
ALK	-0.0312442	0.673732	0.847795	184	160
ALLC	0.00330554	0.964479	0.985779	184	79
ALMS1P	-0.034146	0.645404	0.830083	184	158
ALMS1	0.0891193	0.228965	0.483167	184	184
ALOX12B	-0.131789	0.0745419	0.238752	184	179
ALOX12P2	0.062907	0.39625	0.654463	184	181
ALOX12	-0.157329	0.0329348	0.137902	184	184
ALOX15B	-0.13376	0.0702666	0.230071	184	184
ALOX15	-0.142454	0.0537275	0.192953	184	177
ALOX5AP	0.36162	4.56965e-07	1.26419e-05	184	184
ALOX5	0.109651	0.138418	0.355265	184	184
ALOXE3	0.0476036	0.521074	0.749857	184	183
ALPI	-0.0643495	0.385487	0.646696	184	99
ALPK1	-0.0516242	0.486456	0.725081	184	184
ALPK2	0.579252	7.06283e-18	1.48172e-15	184	184
ALPK3	0.154811	0.0358779	0.146449	184	184
ALPL	0.140992	0.0562595	0.199133	184	184
ALPPL2	-0.101896	0.168714	0.403024	184	130
ALPP	-0.0309288	0.67684	0.849301	184	137
ALS2CL	-0.203424	0.00561273	0.0370502	184	184
ALS2CR11	-0.0967036	0.191595	0.434443	184	176
ALS2CR12	0.0752887	0.309749	0.571906	184	174
ALS2CR4	0.0297875	0.688131	0.854997	184	184
ALS2CR8	-0.140153	0.0577564	0.202898	184	184
ALS2	0.031385	0.672347	0.846952	184	184
ALX1	0.111522	0.131772	0.344296	184	115
ALX3	-0.0645967	0.38366	0.644608	184	184
ALX4	0.208696	0.00446953	0.0309867	184	132
AMAC1L2	0.0639148	0.388712	0.649017	184	169
AMAC1L3	0.0127855	0.863236	0.942411	184	158
AMAC1	-0.105522	0.153985	0.379917	184	69
AMACR	-0.00624667	0.932931	0.972863	184	184
AMBN	-0.0462183	0.533287	0.757754	184	40
AMBP	-0.0533231	0.472207	0.713554	184	154
AMBRA1	-0.16999	0.0210574	0.0999282	184	184
AMD1	-0.120374	0.103603	0.29584	184	184
AMDHD1	-0.0343762	0.643178	0.828978	184	183
AMDHD2	0.165005	0.0251987	0.114199	184	184
AMELX	-0.125347	0.0900014	0.271055	184	48
AMELY	-0.117181	0.113161	0.312445	184	24
AMFR	-0.093003	0.209232	0.458141	184	184
AMHR2	0.081736	0.270022	0.528903	184	98
AMH	-0.0475707	0.521363	0.749857	184	183
AMICA1	0.0515426	0.487146	0.725707	184	184
AMIGO1	-0.111764	0.13093	0.343038	184	184
AMIGO2	0.382084	8.69979e-08	2.86766e-06	184	184
AMIGO3	-0.157322	0.0329429	0.137907	184	184
AMMECR1L	0.191885	0.00906996	0.0538799	184	184
AMMECR1	-0.156355	0.0340481	0.141159	184	184
AMN1	-0.106856	0.148815	0.372129	184	184
AMN	-0.104642	0.157466	0.385249	184	184
AMOTL1	0.123105	0.0959449	0.282312	184	184
AMOTL2	-0.0375248	0.613053	0.812154	184	184
AMOT	-0.165716	0.0245683	0.112201	184	184
AMPD1	-0.0764834	0.302112	0.564481	184	126
AMPD2	0.235373	0.00129854	0.0116857	184	184
AMPD3	0.0545526	0.462039	0.706409	184	184
AMPH	0.481696	4.43913e-12	3.64915e-10	184	184
AMTN	0.198317	0.00696256	0.0438343	184	137
AMT	-0.0371634	0.616479	0.81373	184	184
AMY1A	0.0148225	0.841713	0.93328	184	98
AMY2A	-0.0104735	0.887787	0.95411	184	67
AMY2B	-0.125712	0.0890602	0.268796	184	184
AMZ1	0.374055	1.69077e-07	5.20675e-06	184	184
AMZ2P1	-0.0319061	0.667228	0.843988	184	184
AMZ2	-0.119357	0.106575	0.301155	184	184
ANAPC10	0.0323766	0.66262	0.841807	184	184
ANAPC11	-0.0647391	0.382611	0.643435	184	184
ANAPC13	-0.0596831	0.420946	0.674881	184	184
ANAPC16	-0.225904	0.00204657	0.0168099	184	184
ANAPC1	-0.00209226	0.977513	0.991474	184	184
ANAPC2	0.0164681	0.824409	0.92494	184	184
ANAPC4	-0.0932545	0.207997	0.456397	184	184
ANAPC5	-0.00890703	0.904483	0.96098	184	184
ANAPC7	-0.232809	0.00147138	0.0129347	184	184
ANGEL1	0.095063	0.199276	0.444404	184	184
ANGEL2	-0.0893544	0.227734	0.481572	184	184
ANGPT1	0.320062	9.46654e-06	0.000183323	184	184
ANGPT2	0.552401	4.3263e-16	6.7544e-14	184	184
ANGPT4	0.0342167	0.64472	0.829738	184	129
ANGPTL1	-0.0608011	0.412282	0.668079	184	183
ANGPTL2	0.680826	2.11189e-26	1.37205e-23	184	184
ANGPTL3	0.109917	0.137456	0.353694	184	166
ANGPTL4	0.210037	0.00421439	0.0296879	184	184
ANGPTL5	-0.0845635	0.253744	0.510326	184	118
ANGPTL6	0.164077	0.0260422	0.116764	184	181
ANGPTL7	-0.00871404	0.906543	0.961543	184	175
ANG	0.027294	0.713038	0.869665	184	184
ANK1	0.170274	0.0208403	0.0991081	184	184
ANK2	0.0877078	0.236452	0.491804	184	184
ANK3	-0.217242	0.00305462	0.0230931	184	184
ANKAR	-0.0580149	0.434069	0.685014	184	184
ANKDD1A	0.219156	0.00279951	0.0215941	184	184
ANKFN1	-0.180342	0.0142967	0.0753586	184	118
ANKFY1	0.0500175	0.50014	0.736184	184	184
ANKHD1-EIF4EBP3	-0.212313	0.00381115	0.0273935	184	184
ANKHD1	-0.132522	0.0729282	0.23553	184	184
ANKH	0.215551	0.00329733	0.0245229	184	184
ANKIB1	-0.0698797	0.345892	0.608301	184	184
ANKK1	-0.0746212	0.31407	0.576502	184	183
ANKLE1	0.0195784	0.791941	0.90957	184	184
ANKLE2	0.171542	0.0198941	0.0956475	184	184
ANKMY1	-0.12811	0.0830815	0.257029	184	184
ANKMY2	0.000965728	0.989619	0.99548	184	184
ANKRA2	-0.139897	0.0582184	0.204023	184	184
ANKRD10	0.0616488	0.405783	0.661954	184	184
ANKRD11	-0.0140309	0.850064	0.937174	184	184
ANKRD12	0.140654	0.0568588	0.200549	184	184
ANKRD13A	-0.152054	0.0393511	0.155979	184	184
ANKRD13B	0.10558	0.153757	0.379634	184	184
ANKRD13C	-0.078071	0.292159	0.553959	184	184
ANKRD13D	0.013816	0.852334	0.938048	184	184
ANKRD16	-0.0775897	0.295153	0.557059	184	184
ANKRD17	-0.0048816	0.947564	0.978563	184	184
ANKRD19	0.057881	0.435132	0.685617	184	184
ANKRD1	0.0925112	0.211661	0.461597	184	148
ANKRD20A3	-0.113167	0.126134	0.33506	184	180
ANKRD20A4	-0.140838	0.0565307	0.199742	184	146
ANKRD20B	-0.110689	0.134699	0.349502	184	177
ANKRD22	-0.266258	0.000258934	0.0030658	184	184
ANKRD23	-0.122105	0.0986964	0.287055	184	184
ANKRD24	-0.0605136	0.4145	0.669556	184	184
ANKRD26P1	0.044963	0.544476	0.766139	184	106
ANKRD26	-0.000778494	0.991632	0.99609	184	184
ANKRD27	-0.163656	0.0264325	0.117907	184	184
ANKRD28	-0.00260206	0.972035	0.989147	184	184
ANKRD29	-0.0069673	0.925216	0.969974	184	184
ANKRD2	0.0435304	0.557386	0.775098	184	145
ANKRD30A	0.0539013	0.46741	0.710196	184	45
ANKRD30B	-0.081874	0.269212	0.528041	184	67
ANKRD31	-0.239484	0.00105978	0.00987689	184	160
ANKRD32	0.0546849	0.460953	0.706084	184	184
ANKRD33	0.10615	0.151536	0.376318	184	114
ANKRD34A	0.114596	0.12139	0.326452	184	184
ANKRD34B	0.0494105	0.505362	0.739788	184	132
ANKRD34C	-0.00489474	0.947423	0.978518	184	88
ANKRD35	-0.141915	0.0546507	0.19543	184	184
ANKRD36BP1	-0.0559898	0.450309	0.697505	184	184
ANKRD36B	0.00267107	0.971294	0.988822	184	184
ANKRD36	0.101369	0.170936	0.406021	184	184
ANKRD37	-0.0212112	0.775036	0.900705	184	184
ANKRD39	-0.00134803	0.98551	0.993795	184	184
ANKRD40	0.144152	0.0509072	0.186007	184	184
ANKRD42	0.134815	0.0680629	0.225458	184	184
ANKRD43	-0.0728672	0.325612	0.58783	184	183
ANKRD44	0.100337	0.17536	0.4121	184	184
ANKRD45	0.0548924	0.459251	0.704817	184	176
ANKRD46	-0.117345	0.112653	0.311706	184	184
ANKRD49	-0.0935372	0.206616	0.454732	184	184
ANKRD50	0.152624	0.0386108	0.153879	184	184
ANKRD52	0.198872	0.0068032	0.0431005	184	184
ANKRD53	0.0965379	0.192361	0.435053	184	184
ANKRD54	0.0175034	0.813567	0.920105	184	184
ANKRD55	0.0526566	0.47777	0.717974	184	159
ANKRD56	-0.295416	4.67826e-05	0.00072477	184	184
ANKRD57	-0.115474	0.118545	0.321938	184	184
ANKRD58	-0.0386105	0.60281	0.80556	184	184
ANKRD5	-0.177032	0.0162153	0.0822401	184	184
ANKRD6	0.121499	0.100393	0.289965	184	184
ANKRD7	0.0897188	0.225836	0.479024	184	92
ANKRD9	-0.00515137	0.944671	0.97733	184	184
ANKS1A	-0.0508264	0.493226	0.730576	184	184
ANKS1B	-0.0533791	0.471742	0.713349	184	182
ANKS3	0.038918	0.599923	0.803568	184	184
ANKS4B	-0.109649	0.138425	0.355265	184	161
ANKS6	-0.0828517	0.263516	0.521901	184	184
ANKZF1	-0.0966772	0.191717	0.434463	184	184
ANLN	0.217267	0.00305108	0.023075	184	184
ANO10	-0.166976	0.0234845	0.108332	184	184
ANO1	0.150293	0.0417139	0.162279	184	184
ANO2	0.0492517	0.506733	0.740878	184	183
ANO3	-0.0508576	0.49296	0.730576	184	173
ANO4	0.206043	0.00501557	0.0339199	184	162
ANO5	-0.0612218	0.409049	0.665072	184	182
ANO6	0.404399	1.24669e-08	4.97195e-07	184	184
ANO7	0.102042	0.168102	0.401992	184	184
ANO8	-0.126922	0.0860016	0.262953	184	184
ANO9	-0.127619	0.0842785	0.259656	184	184
ANP32A	-0.0115617	0.876217	0.948662	184	184
ANP32B	0.0530444	0.474529	0.715345	184	184
ANP32C	-0.00284179	0.96946	0.988154	184	149
ANP32D	0.10994	0.137375	0.353575	184	61
ANP32E	0.00951685	0.897978	0.959228	184	184
ANPEP	0.210269	0.00417152	0.0294891	184	184
ANTXR1	0.572036	2.21466e-17	4.20786e-15	184	184
ANTXR2	0.27254	0.00018196	0.00229473	184	184
ANTXRL	-0.076511	0.301937	0.564311	184	30
ANUBL1	-0.0880495	0.234624	0.489417	184	184
ANXA10	-0.167098	0.0233812	0.107955	184	174
ANXA11	-0.25542	0.000466477	0.00497081	184	184
ANXA13	-0.0540054	0.46655	0.709691	184	177
ANXA1	-0.160733	0.0292858	0.126597	184	184
ANXA2P1	-0.0337762	0.648987	0.831738	184	184
ANXA2P2	-0.0628539	0.39665	0.654619	184	184
ANXA2P3	-0.112901	0.127033	0.33667	184	176
ANXA2	-0.0397528	0.592118	0.79837	184	184
ANXA3	0.000965232	0.989625	0.99548	184	184
ANXA4	-0.0584544	0.430589	0.682882	184	184
ANXA5	0.425783	1.68592e-09	8.08437e-08	184	184
ANXA6	0.451986	1.19144e-10	7.33809e-09	184	184
ANXA7	-0.1212	0.101239	0.291864	184	184
ANXA8L1	-0.0294358	0.691624	0.857012	184	108
ANXA8L2	0.0133388	0.857379	0.940393	184	184
ANXA8	0.0128002	0.86308	0.942411	184	183
ANXA9	-0.289158	6.86321e-05	0.00100894	184	184
AOAH	0.0338662	0.648114	0.831093	184	183
AOC2	0.0202792	0.784674	0.905894	184	184
AOC3	0.252014	0.000558388	0.00580286	184	184
AOX1	0.00590937	0.936545	0.974227	184	183
AOX2P	-0.000924919	0.990058	0.995694	184	9
AP1AR	-0.106771	0.149142	0.372625	184	184
AP1B1	-0.117727	0.111479	0.309725	184	184
AP1G1	-0.148523	0.0442085	0.169172	184	184
AP1G2	-0.126994	0.0858243	0.262615	184	184
AP1M1	0.243604	0.000861552	0.00829826	184	184
AP1M2	-0.0691388	0.351042	0.613373	184	184
AP1S1	-0.0576715	0.436799	0.686639	184	184
AP1S2	0.290556	6.30505e-05	0.000938535	184	184
AP1S3	-0.212981	0.00369956	0.0267729	184	184
AP2A1	0.0268721	0.717283	0.872242	184	184
AP2A2	-0.0114497	0.877407	0.949083	184	184
AP2B1	0.0720576	0.33103	0.592987	184	184
AP2M1	0.0699245	0.345582	0.607915	184	184
AP2S1	-0.0488637	0.510091	0.743198	184	184
AP3B1	-0.0966555	0.191817	0.434531	184	184
AP3B2	0.0577506	0.436169	0.686262	184	170
AP3D1	0.13794	0.0618601	0.212895	184	184
AP3M1	-0.134552	0.0686069	0.226701	184	184
AP3M2	0.108328	0.143269	0.362721	184	184
AP3S1	0.06195	0.403489	0.660313	184	184
AP3S2	-0.0151262	0.838514	0.931333	184	184
AP4B1	-0.156809	0.0335252	0.13959	184	184
AP4E1	-0.0036195	0.961108	0.984574	184	184
AP4M1	-0.0615745	0.40635	0.662395	184	184
AP4S1	0.190959	0.00941576	0.0552062	184	184
APAF1	0.0353267	0.634019	0.823284	184	184
APBA1	0.128583	0.081943	0.254759	184	184
APBA2	0.314736	1.35341e-05	0.000247796	184	184
APBA3	0.144396	0.0505129	0.185239	184	184
APBB1IP	0.103234	0.163161	0.394155	184	184
APBB1	0.177281	0.0160632	0.0816746	184	184
APBB2	0.360361	5.04162e-07	1.38335e-05	184	184
APBB3	0.0511756	0.490256	0.72835	184	184
APC2	0.134055	0.0696451	0.228855	184	184
APCDD1L	0.40064	1.74693e-08	6.71433e-07	184	184
APCDD1	0.124963	0.0909974	0.27264	184	184
APCS	-0.0646809	0.383039	0.643887	184	15
APC	-0.101827	0.169004	0.403205	184	184
APEH	-0.159418	0.0306527	0.130877	184	184
APEX1	0.0759936	0.305228	0.567722	184	184
APEX2	-0.177853	0.0157196	0.0804555	184	184
APH1A	-0.194475	0.00816161	0.0497792	184	184
APH1B	0.0884172	0.232668	0.487068	184	184
API5	-0.0690171	0.351893	0.614163	184	184
APIP	-0.126224	0.087756	0.266456	184	184
APITD1	-0.0860163	0.245648	0.501608	184	184
APLF	0.0444142	0.549404	0.769632	184	184
APLNR	0.238576	0.00110876	0.0102574	184	184
APLN	0.537403	3.6854e-15	5.08384e-13	184	184
APLP1	0.234169	0.00137725	0.0122169	184	184
APLP2	0.1414	0.0555429	0.197534	184	184
APOA1BP	-0.175947	0.0168916	0.0847314	184	184
APOA1	0.0248162	0.738092	0.88308	184	180
APOA2	0.0296218	0.689776	0.855925	184	84
APOA4	-0.02281	0.758584	0.8932	184	73
APOA5	-0.0399315	0.590453	0.797032	184	104
APOB48R	0.334161	3.55478e-06	7.84154e-05	184	184
APOBEC1	-0.0869581	0.240498	0.496731	184	117
APOBEC2	-0.0671164	0.365345	0.626779	184	183
APOBEC3A	0.00605859	0.934946	0.973515	184	182
APOBEC3B	0.119047	0.107495	0.303076	184	184
APOBEC3C	0.132747	0.0724379	0.234527	184	184
APOBEC3D	0.0425547	0.566261	0.781345	184	184
APOBEC3F	0.074486	0.31495	0.577485	184	184
APOBEC3G	0.179638	0.0146869	0.0767501	184	184
APOBEC3H	0.0942522	0.203152	0.45001	184	177
APOBEC4	-0.105574	0.153779	0.37964	184	123
APOB	-0.0241298	0.745083	0.886556	184	177
APOC1P1	-0.0212284	0.774858	0.900611	184	60
APOC1	0.230986	0.00160683	0.0138179	184	184
APOC2	0.20977	0.00426409	0.0299706	184	184
APOC3	-0.0243669	0.742665	0.885361	184	56
APOC4	0.080431	0.277769	0.538118	184	76
APOD	-0.0535423	0.470386	0.712192	184	184
APOE	0.331779	4.20889e-06	9.09517e-05	184	184
APOF	0.054975	0.458575	0.704209	184	94
APOH	-0.0343987	0.64296	0.828813	184	84
APOL1	-0.0019836	0.97868	0.991829	184	184
APOL2	0.0285444	0.700508	0.862256	184	184
APOL3	0.0483184	0.514829	0.746196	184	184
APOL4	0.133682	0.0704329	0.230354	184	184
APOL5	0.0346011	0.641005	0.827259	184	54
APOL6	0.00714644	0.923299	0.969503	184	184
APOLD1	0.145434	0.0488607	0.181359	184	184
APOM	-0.134015	0.069728	0.228903	184	184
APOOL	-0.122681	0.0971047	0.284422	184	184
APOO	-0.0754827	0.308501	0.570909	184	184
APPBP2	0.00667798	0.928312	0.971181	184	184
APPL1	-0.226136	0.00202429	0.0166609	184	184
APPL2	-0.130254	0.0780142	0.246418	184	184
APP	0.375751	1.47148e-07	4.60895e-06	184	184
APRT	-0.0892496	0.228282	0.482485	184	184
APTX	-0.194741	0.008073	0.0493296	184	184
AQP10	0.148458	0.0443021	0.169339	184	138
AQP11	-0.0228657	0.758012	0.892943	184	184
AQP12A	-0.0117166	0.874571	0.947762	184	53
AQP12B	-0.0449739	0.544379	0.766062	184	112
AQP1	-0.0190308	0.797634	0.912316	184	184
AQP2	-0.133848	0.0700816	0.229801	184	109
AQP3	-0.219548	0.00274965	0.0212583	184	184
AQP4	-0.121253	0.101087	0.291508	184	125
AQP5	-0.292305	5.66629e-05	0.000853546	184	170
AQP6	-0.141356	0.0556208	0.197601	184	173
AQP7P1	-0.121811	0.0995169	0.288467	184	172
AQP7P3	-0.0866426	0.242215	0.498437	184	79
AQP7	-0.230772	0.00162346	0.0139193	184	160
AQP8	0.010035	0.892456	0.956288	184	101
AQP9	0.443731	2.81337e-10	1.58272e-08	184	184
AQPEP	0.0368511	0.619447	0.816043	184	177
AQR	-0.13938	0.0591628	0.206148	184	184
ARAF	-0.0977376	0.186867	0.427816	184	184
ARAP1	0.112886	0.127082	0.33668	184	184
ARAP2	-0.208459	0.00451604	0.0312338	184	184
ARAP3	0.0880016	0.23488	0.489697	184	184
ARCN1	0.0337748	0.649	0.831738	184	184
ARC	0.0214368	0.772708	0.899857	184	184
AREG	0.11837	0.109525	0.30623	184	184
ARF1	-0.160186	0.0298478	0.128338	184	184
ARF3	-4.12275e-05	0.999557	0.999641	184	184
ARF4	0.165545	0.0247187	0.112658	184	184
ARF5	-0.123316	0.0953727	0.281322	184	184
ARF6	-0.209871	0.00424522	0.0298633	184	184
ARFGAP1	0.249176	0.000647461	0.00658246	184	184
ARFGAP2	-0.163591	0.0264931	0.11802	184	184
ARFGAP3	0.157198	0.0330835	0.138323	184	184
ARFGEF1	-0.118962	0.107749	0.303632	184	184
ARFGEF2	-0.0479446	0.51809	0.747833	184	184
ARFIP1	-0.177859	0.0157157	0.0804555	184	184
ARFIP2	-0.109003	0.140775	0.35886	184	184
ARFRP1	0.18072	0.0140904	0.0746595	184	184
ARG1	-0.111997	0.130123	0.341635	184	164
ARG2	-0.191586	0.00918009	0.0543147	184	184
ARGFXP2	-0.0918606	0.214905	0.466001	184	183
ARGFX	-0.0105919	0.886527	0.953163	184	75
ARGLU1	-0.0451748	0.542581	0.764861	184	184
ARHGAP10	0.0186328	0.801778	0.914906	184	184
ARHGAP11A	0.0637748	0.389754	0.649751	184	184
ARHGAP11B	0.0859557	0.245983	0.501934	184	184
ARHGAP12	-0.15377	0.0371572	0.149905	184	184
ARHGAP15	0.212206	0.00382931	0.02749	184	184
ARHGAP17	0.0593722	0.423373	0.676887	184	184
ARHGAP18	0.144339	0.0506056	0.185443	184	184
ARHGAP19	-0.120355	0.10366	0.295877	184	184
ARHGAP1	0.0888238	0.230518	0.484669	184	184
ARHGAP20	0.192726	0.00876555	0.0523618	184	183
ARHGAP21	0.174432	0.0178764	0.0883025	184	184
ARHGAP22	0.393482	3.28353e-08	1.19585e-06	184	184
ARHGAP23	-0.00968429	0.896193	0.958445	184	184
ARHGAP24	0.224257	0.00221102	0.0178835	184	184
ARHGAP25	0.172733	0.0190396	0.0925331	184	184
ARHGAP26	-0.210249	0.00417526	0.0295051	184	184
ARHGAP27	-0.324961	6.77297e-06	0.000137646	184	184
ARHGAP28	0.233226	0.00144191	0.0127035	184	184
ARHGAP29	0.252842	0.000534632	0.00560223	184	184
ARHGAP30	0.0670844	0.365574	0.626823	184	184
ARHGAP31	0.305764	2.43383e-05	0.000414699	184	184
ARHGAP32	-0.307595	2.16241e-05	0.000372867	184	184
ARHGAP33	0.0135798	0.85483	0.938739	184	184
ARHGAP36	0.0998435	0.177502	0.414866	184	67
ARHGAP39	-0.0020758	0.97769	0.991474	184	184
ARHGAP42	0.128112	0.0830777	0.257029	184	184
ARHGAP4	0.00946197	0.898563	0.959477	184	184
ARHGAP5	-0.0261919	0.724145	0.875431	184	184
ARHGAP6	0.0828287	0.263649	0.521988	184	184
ARHGAP8	-0.0429539	0.562622	0.779025	184	184
ARHGAP9	0.178433	0.0153772	0.0792877	184	184
ARHGDIA	-0.0166696	0.822296	0.924269	184	184
ARHGDIB	0.214098	0.00351953	0.0257851	184	184
ARHGDIG	-0.0930719	0.208893	0.457742	184	134
ARHGEF10L	-0.212885	0.00371544	0.0268589	184	184
ARHGEF10	0.385633	6.44856e-08	2.19012e-06	184	184
ARHGEF11	-0.237599	0.00116373	0.0106825	184	184
ARHGEF12	-0.0710047	0.338164	0.600371	184	184
ARHGEF15	0.251757	0.000565958	0.00586941	184	184
ARHGEF16	-0.122728	0.0969754	0.284168	184	184
ARHGEF17	0.571917	2.25611e-17	4.24655e-15	184	184
ARHGEF18	0.00697389	0.925145	0.969974	184	184
ARHGEF19	0.0442889	0.550532	0.769932	184	184
ARHGEF1	-0.0488931	0.509836	0.743043	184	184
ARHGEF2	-0.0426114	0.565743	0.781165	184	184
ARHGEF33	0.187965	0.0106151	0.0607006	184	182
ARHGEF35	-0.0897481	0.225684	0.478802	184	184
ARHGEF37	-0.0473805	0.523032	0.750863	184	184
ARHGEF38	-0.106607	0.149772	0.373502	184	138
ARHGEF3	-0.157977	0.0322125	0.135667	184	184
ARHGEF4	0.024761	0.738654	0.883297	184	184
ARHGEF5	-0.096985	0.1903	0.432626	184	184
ARHGEF6	0.306426	2.33211e-05	0.000398377	184	184
ARHGEF7	0.0888761	0.230243	0.484342	184	184
ARHGEF9	-0.0627425	0.397489	0.655323	184	184
ARID1A	-0.0787803	0.287783	0.549379	184	184
ARID1B	-0.11209	0.129802	0.341104	184	184
ARID2	0.001056	0.988649	0.995103	184	184
ARID3A	0.145706	0.0484358	0.18018	184	184
ARID3B	-0.12335	0.0952799	0.281164	184	184
ARID3C	0.0497285	0.502624	0.738057	184	110
ARID4A	0.0404864	0.585296	0.793741	184	184
ARID4B	0.0163789	0.825345	0.925157	184	184
ARID5A	0.372598	1.90365e-07	5.74806e-06	184	184
ARID5B	0.098938	0.181485	0.420524	184	184
ARIH1	-0.0546616	0.461144	0.706123	184	184
ARIH2	-0.144281	0.0506988	0.185618	184	184
ARL10	0.23472	0.00134069	0.0119635	184	184
ARL11	-0.0911507	0.218485	0.470154	184	184
ARL13A	-0.0124178	0.867133	0.944615	184	170
ARL13B	0.160997	0.0290173	0.125742	184	184
ARL14	-0.0387493	0.601507	0.804673	184	180
ARL15	0.257461	0.000418341	0.00453954	184	184
ARL16	0.0155573	0.833976	0.9294	184	184
ARL17A	0.0449899	0.544235	0.765961	184	184
ARL17B	-0.0451349	0.542937	0.765055	184	174
ARL1	-0.146651	0.0469818	0.176287	184	184
ARL2BP	0.0748629	0.312501	0.574865	184	184
ARL2	0.10075	0.173582	0.409888	184	184
ARL3	0.121099	0.101524	0.2921	184	184
ARL4A	-0.198088	0.00702943	0.0441787	184	184
ARL4C	0.218992	0.00282053	0.0216973	184	184
ARL4D	-0.0220612	0.766276	0.896943	184	184
ARL5A	-0.153124	0.0379702	0.152153	184	184
ARL5B	-0.0577097	0.436495	0.686475	184	184
ARL5C	-0.0171478	0.817287	0.922065	184	72
ARL6IP1	-0.0580477	0.433808	0.684907	184	184
ARL6IP4	-0.00134649	0.985527	0.993795	184	184
ARL6IP5	0.0784178	0.290014	0.551911	184	184
ARL6IP6	0.131546	0.0750821	0.239834	184	184
ARL6	0.109693	0.138263	0.355	184	184
ARL8A	-0.027299	0.712988	0.869665	184	184
ARL8B	-0.0278609	0.707348	0.866439	184	184
ARL9	0.247532	0.000704875	0.00704175	184	180
ARMC10	0.0722653	0.329635	0.591494	184	184
ARMC1	0.0431992	0.560391	0.777238	184	184
ARMC2	0.020053	0.787017	0.907248	184	184
ARMC3	0.00960789	0.897007	0.958902	184	131
ARMC4	-0.0655671	0.376541	0.637916	184	144
ARMC5	0.0907475	0.220538	0.472715	184	184
ARMC6	0.0313114	0.673071	0.847492	184	184
ARMC7	-0.180879	0.0140045	0.0743607	184	184
ARMC8	-0.136264	0.0651264	0.219486	184	184
ARMC9	0.309477	1.91349e-05	0.00033545	184	184
ARMCX1	0.301711	3.15301e-05	0.000517957	184	184
ARMCX2	0.266816	0.00025104	0.00298992	184	184
ARMCX3	0.103513	0.16202	0.392273	184	184
ARMCX5	-0.0908294	0.22012	0.472283	184	184
ARMCX6	-0.0196162	0.791549	0.909453	184	183
ARMS2	-0.0766022	0.30136	0.56386	184	117
ARNT2	0.0921131	0.213642	0.464458	184	184
ARNTL2	0.0440006	0.553132	0.771898	184	184
ARNTL	0.0670967	0.365486	0.626793	184	184
ARNT	-0.084668	0.253155	0.509638	184	184
ARPC1A	-0.0496894	0.502959	0.738094	184	184
ARPC1B	0.228457	0.00181353	0.0152567	184	184
ARPC2	-0.0522068	0.481544	0.721009	184	184
ARPC3	-0.167257	0.0232481	0.107537	184	184
ARPC4	-0.0496912	0.502944	0.738094	184	184
ARPC5L	-0.0360912	0.626693	0.819478	184	184
ARPC5	-0.0627854	0.397166	0.654925	184	184
ARPM1	0.10397	0.160167	0.389631	184	184
ARPP19	0.110248	0.136269	0.352123	184	184
ARPP21	-0.0635167	0.391679	0.650765	184	48
ARR3	0.100512	0.174603	0.411095	184	100
ARRB1	0.00671991	0.927864	0.970938	184	184
ARRB2	0.0697525	0.346773	0.609425	184	184
ARRDC1	-0.19573	0.0077512	0.0478422	184	184
ARRDC2	0.0940805	0.20398	0.451099	184	184
ARRDC3	0.0600283	0.418259	0.672661	184	184
ARRDC4	0.175391	0.0172475	0.0860025	184	184
ARRDC5	-0.0254061	0.732101	0.879782	184	181
ARSA	0.0780804	0.2921	0.553959	184	184
ARSB	0.46721	2.2967e-11	1.64026e-09	184	184
ARSD	-0.136175	0.0653029	0.21964	184	184
ARSE	0.0605652	0.414101	0.669288	184	181
ARSF	-0.323646	7.41411e-06	0.000149044	184	96
ARSG	-0.0611216	0.409818	0.665811	184	184
ARSH	-0.247975	0.000688956	0.00690671	184	115
ARSI	0.333054	3.84563e-06	8.40945e-05	184	184
ARSJ	0.285305	8.65126e-05	0.00123414	184	184
ARSK	0.207192	0.00477224	0.0326581	184	184
ART1	0.0645283	0.384165	0.645027	184	77
ART3	-0.0139777	0.850626	0.937486	184	157
ART4	-0.0450998	0.543251	0.765378	184	122
ART5	0.062687	0.397907	0.655691	184	167
ARTN	0.129389	0.0800288	0.250588	184	184
ARV1	-0.280468	0.000115156	0.00156495	184	184
ARVCF	0.139167	0.0595551	0.207018	184	184
ARX	-0.0765734	0.301542	0.563999	184	149
AR	0.167728	0.0228568	0.106241	184	182
AS3MT	0.189724	0.00989506	0.0574147	184	184
ASAH1	-0.081732	0.270045	0.528903	184	184
ASAH2B	-0.099452	0.179216	0.416936	184	156
ASAH2	0.0183969	0.804236	0.915926	184	156
ASAM	0.481865	4.35297e-12	3.60777e-10	184	184
ASAP1IT1	0.00937484	0.899492	0.959764	184	163
ASAP1	0.345296	1.58366e-06	3.88004e-05	184	184
ASAP2	-0.0424895	0.566857	0.781685	184	184
ASAP3	0.00324154	0.965167	0.985904	184	184
ASB10	-0.0732304	0.3232	0.585312	184	19
ASB11	0.00865765	0.907145	0.961545	184	21
ASB12	-0.211397	0.00396904	0.0283061	184	149
ASB13	-0.0486827	0.511661	0.744358	184	184
ASB14	-0.126682	0.0866032	0.264071	184	184
ASB15	-0.0260035	0.726051	0.876238	184	65
ASB16	-0.125859	0.0886847	0.267983	184	184
ASB17	0.01409	0.84944	0.936807	184	25
ASB18	0.179048	0.0150214	0.0780723	184	85
ASB1	0.110016	0.137099	0.353227	184	184
ASB2	0.234467	0.00135734	0.0120746	184	184
ASB3	-0.013574	0.854892	0.938745	184	184
ASB4	-0.0804069	0.277914	0.538347	184	121
ASB5	0.0360475	0.62711	0.819811	184	126
ASB6	0.0260567	0.725512	0.876033	184	184
ASB7	0.0362073	0.625583	0.819006	184	184
ASB8	-0.210068	0.0042086	0.0296575	184	184
ASB9	-0.0581687	0.432849	0.684376	184	184
ASCC1	-0.0442809	0.550605	0.769932	184	184
ASCC2	-0.0980361	0.185518	0.426035	184	184
ASCC3	0.0288793	0.697166	0.860269	184	184
ASCL1	0.0275595	0.710371	0.868083	184	152
ASCL2	-0.134346	0.0690354	0.227482	184	184
ASCL3	0.0662062	0.371898	0.633465	184	106
ASCL4	0.00390423	0.958052	0.983443	184	96
ASF1A	-0.0745514	0.314525	0.576921	184	184
ASF1B	-0.0446735	0.547073	0.767884	184	184
ASFMR1	-0.143507	0.0519642	0.188773	184	178
ASGR1	0.072664	0.326967	0.589167	184	183
ASGR2	0.073737	0.319855	0.582288	184	168
ASH1L	-0.158175	0.0319934	0.134885	184	184
ASH2L	-0.0934659	0.206964	0.455149	184	184
ASIP	0.115253	0.119256	0.323173	184	176
ASL	-0.0314015	0.672184	0.846906	184	184
ASMTL	0.0679799	0.359194	0.621066	184	184
ASMT	0.0125501	0.86573	0.943751	184	97
ASNA1	0.0704488	0.341968	0.604091	184	184
ASNSD1	-0.0477587	0.519716	0.749147	184	184
ASNS	-0.155212	0.0353941	0.145004	184	184
ASPA	-0.0785283	0.289332	0.551292	184	161
ASPDH	0.0641572	0.386911	0.647693	184	116
ASPG	-0.187408	0.0108525	0.0617428	184	170
ASPHD1	0.0964767	0.192644	0.435475	184	184
ASPHD2	0.0493055	0.506269	0.740683	184	184
ASPH	0.0582523	0.432187	0.683866	184	184
ASPM	0.0729405	0.325124	0.587376	184	184
ASPN	0.517702	5.2564e-14	5.78491e-12	184	184
ASPRV1	-0.145971	0.0480241	0.179178	184	184
ASPSCR1	-0.0809402	0.274729	0.534438	184	184
ASRGL1	-0.115305	0.119086	0.322928	184	184
ASS1	-0.0912026	0.218222	0.469746	184	184
ASTE1	-0.059248	0.424346	0.677957	184	184
ASTL	-0.0848305	0.252242	0.508779	184	153
ASTN1	0.0781442	0.291705	0.553518	184	144
ASTN2	0.0307082	0.679017	0.850499	184	184
ASXL1	0.139129	0.0596262	0.20719	184	184
ASXL2	0.0320399	0.665916	0.8436	184	184
ASXL3	0.273019	0.000177069	0.00224711	184	174
ASZ1	-0.0246674	0.739606	0.883739	184	18
ATAD1	0.00409437	0.956011	0.982665	184	184
ATAD2B	-0.184677	0.0120855	0.0669609	184	184
ATAD2	0.167463	0.0230767	0.106922	184	184
ATAD3A	0.00985726	0.89435	0.957536	184	184
ATAD3B	-0.0238746	0.747687	0.887661	184	184
ATAD3C	-0.0874237	0.23798	0.49386	184	184
ATAD5	-0.0304028	0.682034	0.851524	184	184
ATCAY	0.209027	0.00440518	0.0306766	184	128
ATE1	-0.147282	0.0460308	0.173965	184	184
ATF1	-0.0431223	0.56109	0.777886	184	184
ATF2	0.152587	0.0386575	0.154018	184	184
ATF3	-0.0400406	0.589437	0.796088	184	184
ATF4	-0.0503265	0.497493	0.734331	184	184
ATF5	-0.0173056	0.815636	0.921215	184	184
ATF6B	-0.149768	0.0424414	0.164163	184	184
ATF6	-0.0185503	0.802637	0.915249	184	184
ATF7IP2	-0.11416	0.122821	0.32942	184	184
ATF7IP	-0.0631899	0.394125	0.652717	184	184
ATF7	0.0672004	0.364743	0.626652	184	184
ATG10	-0.0978095	0.186541	0.42746	184	184
ATG12	0.13191	0.0742735	0.238374	184	184
ATG16L1	-0.124665	0.0917774	0.273999	184	184
ATG16L2	-0.0847545	0.252669	0.509148	184	184
ATG2A	-0.0803423	0.278301	0.538796	184	184
ATG2B	0.0388091	0.600945	0.804137	184	184
ATG3	0.00914804	0.901911	0.960784	184	184
ATG4A	-0.0989141	0.181591	0.420625	184	184
ATG4B	-0.157248	0.0330268	0.13818	184	184
ATG4C	0.0178142	0.810318	0.91876	184	184
ATG4D	-0.117023	0.113649	0.313289	184	184
ATG5	0.0173518	0.815152	0.920921	184	184
ATG7	-0.0258877	0.727222	0.876916	184	184
ATG9A	-0.0671097	0.365393	0.626779	184	184
ATG9B	-0.209469	0.00432078	0.030226	184	184
ATHL1	0.0188336	0.799687	0.913435	184	184
ATIC	0.0270179	0.715815	0.871563	184	184
ATL1	0.194559	0.00813346	0.0496387	184	184
ATL2	-0.098811	0.182049	0.421337	184	184
ATL3	0.0929933	0.20928	0.458141	184	184
ATMIN	-0.123522	0.0948165	0.27996	184	184
ATM	0.146886	0.0466253	0.175652	184	184
ATN1	-0.00420322	0.954842	0.982263	184	184
ATOH1	-0.0645727	0.383838	0.644853	184	95
ATOH7	0.0410107	0.580443	0.790942	184	168
ATOH8	-0.144936	0.0496474	0.183602	184	184
ATOX1	0.0948316	0.200376	0.44589	184	184
ATP10A	0.44417	2.6892e-10	1.5171e-08	184	184
ATP10B	-0.30055	3.3934e-05	0.000549823	184	184
ATP10D	0.0961762	0.19404	0.437427	184	184
ATP11A	-0.0355691	0.631692	0.821512	184	184
ATP11B	-0.190423	0.00962113	0.0561488	184	184
ATP11C	0.150017	0.0420952	0.163343	184	184
ATP12A	0.0245221	0.741085	0.884758	184	137
ATP13A1	-0.0348756	0.638359	0.825636	184	184
ATP13A2	-0.0380311	0.608267	0.809254	184	184
ATP13A3	0.0583098	0.431732	0.683468	184	184
ATP13A4	-0.333938	3.61146e-06	7.94917e-05	184	180
ATP13A5	-0.141215	0.0558662	0.198138	184	121
ATP1A1	-0.0588793	0.42724	0.680421	184	184
ATP1A2	-0.0399596	0.590191	0.796839	184	180
ATP1A3	-0.0872641	0.238841	0.494831	184	184
ATP1A4	0.0390041	0.599116	0.803075	184	101
ATP1B1	-0.0379265	0.609254	0.809872	184	184
ATP1B2	0.166861	0.0235814	0.108688	184	184
ATP1B3	0.0232417	0.75416	0.890707	184	184
ATP1B4	0.131646	0.0748603	0.239467	184	25
ATP2A1	-0.14827	0.0445754	0.169996	184	184
ATP2A2	-0.0585137	0.43012	0.682472	184	184
ATP2A3	-0.0496916	0.50294	0.738094	184	184
ATP2B1	-0.0118944	0.872684	0.947172	184	184
ATP2B2	-0.021609	0.770932	0.899134	184	167
ATP2B3	0.0765115	0.301934	0.564311	184	95
ATP2B4	0.118365	0.109537	0.30623	184	184
ATP2C1	0.129078	0.0807616	0.252131	184	184
ATP2C2	-0.0982346	0.184625	0.425025	184	184
ATP4A	0.0254797	0.731354	0.879529	184	98
ATP4B	0.0183414	0.804815	0.916053	184	108
ATP5A1	-0.0691961	0.350642	0.613068	184	184
ATP5B	-0.143552	0.0518904	0.188607	184	184
ATP5C1	-0.178718	0.0152115	0.0786703	184	184
ATP5D	-0.0306903	0.679194	0.850549	184	184
ATP5EP2	0.130703	0.0769856	0.244139	184	184
ATP5E	0.0179931	0.80845	0.917978	184	184
ATP5F1	-0.216545	0.00315252	0.0236733	184	184
ATP5G1	-0.150226	0.0418059	0.16248	184	184
ATP5G2	-0.13262	0.0727141	0.235104	184	184
ATP5G3	-0.134708	0.0682839	0.225856	184	184
ATP5H	-0.168637	0.0221184	0.103777	184	184
ATP5I	-0.2095	0.00431485	0.0301949	184	184
ATP5J2	-0.0853013	0.24961	0.506258	184	184
ATP5J	-0.173186	0.0187232	0.0914367	184	184
ATP5L2	-0.01261	0.865096	0.943213	184	151
ATP5L	-0.183791	0.0125112	0.0686211	184	184
ATP5O	-0.257854	0.000409601	0.00446394	184	184
ATP5SL	-0.0374337	0.613916	0.812812	184	184
ATP5S	-0.0296021	0.689971	0.855969	184	184
ATP6AP1L	-0.0339618	0.647188	0.830621	184	184
ATP6AP1	-0.0785453	0.289228	0.551197	184	184
ATP6AP2	0.142706	0.053301	0.191968	184	184
ATP6V0A1	-0.305247	2.51601e-05	0.000426895	184	184
ATP6V0A2	0.0149407	0.840467	0.932465	184	184
ATP6V0A4	-0.284776	8.9288e-05	0.00126638	184	158
ATP6V0B	0.0223985	0.762808	0.895013	184	184
ATP6V0C	-0.172002	0.0195602	0.0944482	184	184
ATP6V0D1	-0.0361305	0.626317	0.819252	184	184
ATP6V0D2	0.378247	1.19778e-07	3.84211e-06	184	184
ATP6V0E1	0.0137899	0.85261	0.938048	184	184
ATP6V0E2	-0.0876849	0.236575	0.491908	184	184
ATP6V1A	0.00222614	0.976074	0.990933	184	184
ATP6V1B1	0.0474187	0.522696	0.750736	184	183
ATP6V1B2	0.0656135	0.376203	0.637719	184	184
ATP6V1C1	0.218408	0.00289682	0.0221496	184	184
ATP6V1C2	-0.278319	0.000130537	0.00174801	184	184
ATP6V1D	-0.0221039	0.765837	0.896613	184	184
ATP6V1E1	0.0410344	0.580224	0.790804	184	184
ATP6V1E2	0.0413656	0.577168	0.789009	184	184
ATP6V1F	-0.100489	0.174701	0.411217	184	184
ATP6V1G1	0.061404	0.407653	0.663714	184	184
ATP6V1G2	0.118792	0.108254	0.304417	184	182
ATP6V1G3	0.0469866	0.526497	0.753497	184	15
ATP6V1H	-0.113619	0.124618	0.33241	184	184
ATP7A	-0.204555	0.00534733	0.0357911	184	184
ATP7B	0.0111716	0.880361	0.950441	184	184
ATP8A1	-0.144415	0.0504829	0.18523	184	184
ATP8A2	0.306456	2.3277e-05	0.000397962	184	181
ATP8B1	-0.149826	0.0423598	0.164043	184	184
ATP8B2	0.420261	2.86468e-09	1.31124e-07	184	184
ATP8B3	0.223763	0.00226263	0.0182132	184	184
ATP8B4	0.266164	0.000260287	0.00307546	184	184
ATP8B5P	-0.170845	0.0204094	0.0975427	184	183
ATP9A	0.0266313	0.71971	0.873414	184	184
ATP9B	0.0165521	0.823529	0.924622	184	184
ATPAF1	-0.181097	0.0138879	0.0739955	184	184
ATPAF2	-0.0247965	0.738292	0.883105	184	184
ATPBD4	-0.0186988	0.80109	0.914512	184	184
ATPIF1	-0.225652	0.00207096	0.0169801	184	184
ATRIP	-0.107401	0.146744	0.368737	184	184
ATRNL1	0.0755316	0.308187	0.570642	184	183
ATRN	0.179003	0.0150474	0.0781067	184	184
ATRX	0.0256159	0.729974	0.878602	184	184
ATR	-0.0279949	0.706004	0.865372	184	184
ATXN10	0.00937144	0.899529	0.959764	184	184
ATXN1L	0.075978	0.305328	0.567803	184	184
ATXN1	0.210615	0.00410849	0.0291458	184	184
ATXN2L	-0.0812411	0.272943	0.532416	184	184
ATXN2	-0.0491609	0.507518	0.741516	184	184
ATXN3L	0.0132889	0.857907	0.940415	184	8
ATXN3	0.0720427	0.331131	0.593114	184	184
ATXN7L1	-0.0657689	0.375071	0.636769	184	184
ATXN7L2	-0.0334456	0.652196	0.834089	184	184
ATXN7L3B	-0.108209	0.14371	0.363607	184	184
ATXN7L3	-0.176754	0.0163859	0.0828761	184	184
ATXN7	-0.159893	0.030153	0.129235	184	184
ATXN8OS	0.0249813	0.736414	0.88219	184	7
AUH	-3.34055e-05	0.999641	0.999641	184	184
AUP1	-0.0103737	0.888849	0.954539	184	184
AURKAIP1	-0.0566106	0.445295	0.693481	184	184
AURKAPS1	0.0339039	0.647749	0.830934	184	183
AURKA	0.0872037	0.239167	0.4951	184	184
AURKB	0.0913052	0.217703	0.469436	184	184
AURKC	0.0440448	0.552733	0.771558	184	184
AUTS2	0.126044	0.0882142	0.267265	184	184
AVEN	0.163704	0.0263881	0.117735	184	184
AVIL	0.114275	0.122443	0.328537	184	184
AVL9	0.00321791	0.96542	0.985969	184	184
AVPI1	-0.190088	0.00975162	0.0567459	184	184
AVPR1A	0.348722	1.22708e-06	3.06617e-05	184	184
AVPR1B	0.0920592	0.213911	0.464619	184	74
AVPR2	-0.0495099	0.504505	0.739096	184	184
AVP	0.0879925	0.234928	0.489697	184	24
AWAT1	-0.0250413	0.735805	0.881775	184	49
AWAT2	-0.0239365	0.747056	0.887405	184	58
AXIN1	-0.0792686	0.284796	0.545988	184	184
AXIN2	-0.0506671	0.494583	0.732014	184	184
AXL	0.518957	4.46001e-14	5.04633e-12	184	184
AZGP1	-0.187693	0.0107304	0.0611861	184	180
AZI1	0.0481034	0.516704	0.747421	184	184
AZI2	0.00330028	0.964536	0.985779	184	184
AZIN1	0.114757	0.120864	0.325689	184	184
AZU1	0.0918599	0.214909	0.466001	184	92
B2M	0.123859	0.0939112	0.278061	184	184
B3GALNT1	-0.00346946	0.962719	0.985391	184	184
B3GALNT2	0.0436085	0.556678	0.774528	184	184
B3GALT1	-0.0736971	0.320118	0.582453	184	147
B3GALT2	-0.0444919	0.548705	0.769188	184	184
B3GALT4	-0.274493	0.000162777	0.00209344	184	184
B3GALT5	-0.214946	0.00338823	0.0250326	184	175
B3GALT6	0.19125	0.00930588	0.0547968	184	184
B3GALTL	0.126616	0.0867683	0.264494	184	184
B3GAT1	0.0356841	0.630589	0.821001	184	182
B3GAT2	-0.0557524	0.452235	0.698736	184	184
B3GAT3	0.166818	0.0236181	0.108824	184	184
B3GNT1	0.129543	0.0796664	0.249676	184	184
B3GNT2	-0.0965737	0.192195	0.434939	184	184
B3GNT3	-0.185417	0.01174	0.0655148	184	184
B3GNT4	0.171063	0.0202468	0.0969957	184	184
B3GNT5	-0.0388899	0.600187	0.803601	184	184
B3GNT6	-0.228518	0.00180833	0.0152256	184	158
B3GNT7	-0.0679234	0.359595	0.621545	184	184
B3GNT8	-0.244733	0.000813505	0.0078959	184	184
B3GNT9	0.319046	1.014e-05	0.000193941	184	184
B3GNTL1	-0.0841063	0.256329	0.513269	184	184
B4GALNT1	0.284893	8.86666e-05	0.00126057	184	184
B4GALNT2	0.056619	0.445227	0.69344	184	123
B4GALNT3	-0.136085	0.0654833	0.219889	184	184
B4GALNT4	0.0269989	0.716006	0.871637	184	180
B4GALT1	0.143763	0.0515432	0.18765	184	184
B4GALT2	0.161926	0.0280905	0.122747	184	184
B4GALT3	-0.0876126	0.236963	0.49229	184	184
B4GALT4	-0.0842764	0.255365	0.512186	184	184
B4GALT5	-0.0863682	0.243715	0.500003	184	184
B4GALT6	0.0754836	0.308495	0.570909	184	184
B4GALT7	0.0698301	0.346235	0.608798	184	184
B9D1	0.0582239	0.432412	0.683953	184	184
B9D2	0.0267914	0.718096	0.872623	184	184
BAALC	0.135492	0.0666779	0.222554	184	182
BAAT	0.00647067	0.930532	0.971737	184	182
BACE1	0.319273	9.9855e-06	0.000191518	184	184
BACE2	-0.0188551	0.799463	0.913334	184	184
BACH1	0.062955	0.395889	0.654238	184	184
BACH2	0.20344	0.00560871	0.0370359	184	184
BAD	-0.0373699	0.61452	0.813037	184	184
BAG1	-0.201031	0.00621283	0.0401057	184	184
BAG2	0.248383	0.000674579	0.00680112	184	184
BAG3	-0.000110189	0.998816	0.999402	184	184
BAG4	0.0044974	0.951685	0.98069	184	184
BAG5	-0.0563864	0.447102	0.69492	184	184
BAGE2	-0.00665356	0.928574	0.971192	184	134
BAGE	0.0176414	0.812123	0.919454	184	59
BAHCC1	0.222774	0.00236936	0.0188537	184	184
BAHD1	-0.00571175	0.938663	0.975171	184	184
BAI1	0.180091	0.0144344	0.075824	184	184
BAI2	0.246788	0.000732363	0.00725876	184	184
BAI3	0.135104	0.0674684	0.224079	184	162
BAIAP2L1	-0.0513676	0.488628	0.726914	184	184
BAIAP2L2	-0.117316	0.112741	0.311802	184	184
BAIAP2	-0.0893479	0.227768	0.481572	184	184
BAIAP3	-0.0200313	0.787243	0.90727	184	184
BAK1	-0.0277192	0.708768	0.866683	184	184
BAMBI	-0.0638223	0.3894	0.649376	184	184
BANF1	0.077377	0.296483	0.558418	184	184
BANF2	-0.00119234	0.987184	0.994641	184	35
BANK1	-0.097282	0.188939	0.430408	184	184
BANP	0.00388494	0.958259	0.983606	184	184
BAP1	-0.0651398	0.379666	0.640623	184	184
BARD1	-0.122443	0.0977591	0.28555	184	184
BARHL1	-0.00691002	0.925829	0.970095	184	88
BARHL2	-0.0394011	0.595401	0.80057	184	46
BARX1	0.251895	0.000561895	0.00583028	184	181
BARX2	-0.20939	0.00433584	0.0303102	184	184
BASE	-0.0195817	0.791907	0.90957	184	11
BASP1	0.372515	1.91661e-07	5.77851e-06	184	184
BAT1	-0.0758165	0.30636	0.568777	184	184
BAT2L1	0.0939338	0.20469	0.452122	184	184
BAT2L2	-0.0918414	0.215002	0.466027	184	184
BAT2	-0.0290373	0.695591	0.859666	184	184
BAT3	-0.114409	0.122002	0.327677	184	184
BAT4	-0.0028568	0.969299	0.988139	184	184
BAT5	-0.15304	0.0380779	0.152524	184	184
BATF2	0.00811318	0.912961	0.964855	184	184
BATF3	0.330098	4.73763e-06	0.000100332	184	184
BATF	0.0170114	0.818715	0.922715	184	184
BAX	-0.0190017	0.797937	0.912472	184	184
BAZ1A	0.176609	0.0164759	0.0832062	184	184
BAZ1B	0.169315	0.0215806	0.101836	184	184
BAZ2A	-0.0401899	0.588049	0.795426	184	184
BAZ2B	-0.0923507	0.212458	0.46283	184	184
BBC3	0.0882275	0.233675	0.488256	184	184
BBOX1	-0.163885	0.0262192	0.117137	184	181
BBS10	0.0777965	0.293864	0.555775	184	184
BBS12	0.119849	0.10513	0.298337	184	184
BBS1	0.0454909	0.539756	0.763016	184	184
BBS2	-0.0626393	0.398267	0.656017	184	184
BBS4	0.140234	0.0576094	0.202594	184	184
BBS5	0.0477877	0.519462	0.748996	184	184
BBS7	0.0568046	0.443734	0.692512	184	184
BBS9	0.0815305	0.271232	0.530094	184	184
BBX	0.126484	0.0871011	0.265177	184	184
BCAM	0.137377	0.0629426	0.215077	184	184
BCAN	-0.155921	0.0345544	0.142637	184	183
BCAP29	0.185417	0.01174	0.0655148	184	184
BCAP31	-0.15917	0.0309164	0.131724	184	184
BCAR1	0.152835	0.0383394	0.153287	184	184
BCAR3	0.179779	0.0146083	0.0765149	184	184
BCAR4	-0.0564568	0.446534	0.694519	184	87
BCAS1	-0.22904	0.00176383	0.0149258	184	183
BCAS2	-0.0912553	0.217955	0.469578	184	184
BCAS3	0.00265227	0.971496	0.988863	184	184
BCAS4	0.111499	0.13185	0.344417	184	184
BCAT1	0.444977	2.47478e-10	1.40797e-08	184	184
BCAT2	-0.0791527	0.285503	0.546632	184	184
BCCIP	-0.0363497	0.624224	0.818062	184	184
BCDIN3D	-0.285578	8.51147e-05	0.00121834	184	184
BCHE	0.0849385	0.251637	0.508217	184	181
BCKDHA	-0.23828	0.00112512	0.010366	184	184
BCKDHB	-0.119193	0.107062	0.302204	184	184
BCKDK	0.0810568	0.274036	0.533709	184	184
BCL10	-0.141883	0.054706	0.195559	184	184
BCL11A	-0.133672	0.0704541	0.230386	184	184
BCL11B	-0.0410759	0.579841	0.790549	184	184
BCL2A1	0.416435	4.11301e-09	1.8126e-07	184	184
BCL2L10	-0.0791657	0.285423	0.546532	184	179
BCL2L11	0.108908	0.141126	0.359329	184	184
BCL2L12	-0.0202238	0.785248	0.906297	184	184
BCL2L13	0.0036268	0.96103	0.984544	184	184
BCL2L14	-0.167393	0.0231348	0.107104	184	184
BCL2L15	-0.18019	0.0143798	0.0755767	184	184
BCL2L1	-0.125222	0.0903243	0.271553	184	184
BCL2L2	0.128423	0.0823254	0.255554	184	184
BCL2	0.0101214	0.891535	0.955843	184	184
BCL3	0.0586866	0.428757	0.681813	184	184
BCL6B	0.46389	3.31156e-11	2.25792e-09	184	184
BCL6	0.0537394	0.468751	0.711267	184	184
BCL7A	0.0423902	0.567765	0.78224	184	184
BCL7B	0.0469996	0.526381	0.753416	184	184
BCL7C	0.00943379	0.898864	0.959563	184	184
BCL8	0.0525229	0.47889	0.718832	184	165
BCL9L	0.103334	0.162752	0.393496	184	184
BCL9	-0.108974	0.140881	0.358976	184	184
BCLAF1	-0.0467381	0.528688	0.754894	184	184
BCMO1	-0.243735	0.000855816	0.00824696	184	178
BCO2	-0.259533	0.000374196	0.00415223	184	184
BCORL1	0.0640133	0.38798	0.648511	184	184
BCORL2	-0.0545628	0.461956	0.706409	184	128
BCOR	-0.0566865	0.444684	0.693033	184	184
BCR	-0.040978	0.580745	0.791139	184	184
BCS1L	-0.060615	0.413717	0.669096	184	184
BCYRN1	0.0473605	0.523207	0.750901	184	6
BDH1	-0.378418	1.18093e-07	3.80542e-06	184	184
BDH2	0.00707541	0.924059	0.969712	184	184
BDKRB1	0.0995111	0.178957	0.416911	184	184
BDKRB2	0.141998	0.0545065	0.195019	184	184
BDNFOS	-0.153847	0.037061	0.149701	184	184
BDNF	-0.0248805	0.737438	0.882767	184	184
BDP1	0.100636	0.174068	0.410272	184	184
BEAN	0.0951284	0.198965	0.444105	184	184
BECN1	-0.147859	0.0451756	0.171506	184	184
BEGAIN	0.144166	0.0508852	0.186002	184	184
BEND2	0.0426864	0.565059	0.780649	184	41
BEND3	-0.0432515	0.559916	0.777007	184	184
BEND4	-0.0796432	0.282518	0.543969	184	165
BEND5	0.0836619	0.258859	0.51567	184	182
BEND6	0.303823	2.75636e-05	0.000462225	184	183
BEND7	-0.040766	0.582706	0.79227	184	184
BEST1	0.290828	6.20134e-05	0.000924463	184	184
BEST2	-0.0237276	0.749189	0.888144	184	164
BEST3	-0.0167053	0.821923	0.924204	184	150
BEST4	0.0620752	0.402538	0.659602	184	183
BET1L	-0.04686	0.527612	0.754184	184	184
BET1	-0.0498441	0.501629	0.737332	184	184
BET3L	0.0880565	0.234586	0.489417	184	123
BEX1	0.064162	0.386876	0.647688	184	140
BEX2	-0.0177106	0.8114	0.919206	184	175
BEX4	0.00259379	0.972124	0.989167	184	184
BEX5	0.020519	0.78219	0.90445	184	181
BEYLA	-0.0414566	0.576331	0.788432	184	7
BFAR	0.150695	0.0411638	0.160807	184	184
BFSP1	0.108976	0.140874	0.358976	184	184
BFSP2	0.021886	0.768079	0.897909	184	122
BGLAP	-0.00898625	0.903638	0.960941	184	184
BGN	0.680613	2.2188e-26	1.39646e-23	184	184
BHLHA15	0.0742262	0.316646	0.57954	184	183
BHLHB9	0.0214248	0.772832	0.899864	184	184
BHLHE22	0.268013	0.00023483	0.00283202	184	184
BHLHE23	-0.0154444	0.835165	0.929881	184	25
BHLHE40	-0.0501699	0.498833	0.735015	184	184
BHLHE41	0.226426	0.00199683	0.0165091	184	184
BHMT2	0.263237	0.000305873	0.00352016	184	182
BHMT	0.0866603	0.242118	0.49837	184	158
BICC1	0.540587	2.35971e-15	3.3468e-13	184	182
BICD1	0.20596	0.00503364	0.0340052	184	184
BICD2	0.0528816	0.475889	0.716812	184	184
BID	0.157942	0.0322509	0.135772	184	184
BIK	0.0120507	0.871026	0.946604	184	184
BIN1	0.113282	0.125747	0.334286	184	184
BIN2	0.10853	0.142519	0.36155	184	184
BIN3	-0.109368	0.139443	0.356891	184	184
BIRC2	0.142375	0.0538624	0.193264	184	184
BIRC3	0.00182456	0.980389	0.99202	184	184
BIRC5	0.0450469	0.543725	0.765685	184	184
BIRC6	-0.0921546	0.213434	0.464108	184	184
BIRC7	0.182233	0.0132917	0.0715954	184	150
BIRC8	-0.0234761	0.751761	0.889725	184	21
BIVM	0.0463085	0.532487	0.757388	184	184
BLCAP	-0.00213224	0.977083	0.991258	184	184
BLID	0.212416	0.00379374	0.0273073	184	54
BLK	-0.150412	0.0415506	0.161769	184	165
BLMH	-0.0937528	0.205568	0.453423	184	184
BLM	0.100856	0.173126	0.409339	184	184
BLNK	-0.283149	9.83422e-05	0.00137226	184	184
BLOC1S1	-0.164345	0.0257956	0.116104	184	184
BLOC1S2	-0.11664	0.114846	0.315208	184	184
BLOC1S3	-0.0572738	0.439972	0.689608	184	184
BLVRA	0.0502424	0.498213	0.734769	184	184
BLVRB	-0.271153	0.000196854	0.0024539	184	184
BLZF1	-0.24485	0.000808683	0.00786039	184	184
BMF	0.317508	1.12463e-05	0.000210894	184	184
BMI1	-0.0538558	0.467787	0.71046	184	184
BMP10	0.0228703	0.757965	0.892943	184	42
BMP15	0.0299339	0.686679	0.853994	184	19
BMP1	0.567204	4.68746e-17	8.34886e-15	184	184
BMP2K	0.0165842	0.823192	0.924501	184	184
BMP2	0.211592	0.00393499	0.0281231	184	184
BMP3	-0.0693425	0.349622	0.612094	184	156
BMP4	-0.0617769	0.404806	0.661216	184	184
BMP5	0.155785	0.0347139	0.143119	184	155
BMP6	0.15168	0.0398428	0.157371	184	184
BMP7	-0.0742536	0.316467	0.579304	184	184
BMP8A	0.679448	2.90668e-26	1.67259e-23	184	184
BMP8B	0.278198	0.000131459	0.00175799	184	184
BMPER	0.189736	0.00989019	0.057403	184	183
BMPR1A	-0.0772047	0.297563	0.559981	184	184
BMPR1B	0.23589	0.00126602	0.0114442	184	183
BMPR2	0.214306	0.003487	0.025584	184	184
BMS1P4	-0.0319257	0.667036	0.843988	184	183
BMS1P5	-0.110394	0.135749	0.350961	184	184
BMS1	0.0698595	0.346032	0.608494	184	184
BMX	-0.01748	0.813812	0.920244	184	180
BNC1	0.0367589	0.620324	0.816528	184	174
BNC2	0.374996	1.56546e-07	4.85053e-06	184	184
BNIP1	-0.00256354	0.972449	0.989298	184	184
BNIP2	0.0849391	0.251634	0.508217	184	184
BNIP3L	0.174585	0.0177744	0.0878903	184	184
BNIP3	0.207237	0.0047629	0.0326164	184	184
BNIPL	-0.251146	0.000584352	0.0060384	184	184
BOC	0.141833	0.0547923	0.195729	184	184
BOD1L	0.114108	0.122995	0.329771	184	184
BOD1	0.165441	0.0248105	0.112872	184	184
BOK	-0.0531836	0.473369	0.714473	184	184
BOLA1	-0.158615	0.0315134	0.133504	184	184
BOLA2	-0.0356685	0.630739	0.82109	184	184
BOLA3	0.0662962	0.371246	0.632831	184	184
BOLL	-0.0656622	0.375848	0.637376	184	179
BOP1	0.0571218	0.441189	0.690622	184	184
BPESC1	0.00171447	0.981572	0.992313	184	53
BPGM	0.262208	0.000323593	0.00369036	184	184
BPHL	-0.1338	0.0701829	0.229984	184	184
BPIL1	-0.014426	0.845894	0.935742	184	61
BPIL2	-0.0392597	0.596722	0.801104	184	94
BPIL3	-0.0971365	0.189605	0.431583	184	11
BPI	0.114684	0.121101	0.326023	184	103
BPNT1	-0.294637	4.90913e-05	0.000755886	184	184
BPTF	-0.0660419	0.373088	0.63452	184	184
BPY2	0.0996783	0.178224	0.415925	184	6
BRAF	-0.115846	0.117353	0.319477	184	184
BRAP	-0.113166	0.126138	0.33506	184	184
BRCA1	-0.00519108	0.944245	0.977285	184	184
BRCA2	0.0424283	0.567416	0.782016	184	184
BRCC3	-0.298343	3.89842e-05	0.000618708	184	184
BRD1	0.0636268	0.390857	0.650352	184	184
BRD2	-0.0880785	0.234469	0.489297	184	184
BRD3	0.0947415	0.200806	0.446482	184	184
BRD4	0.0840451	0.256676	0.513441	184	184
BRD7P3	0.0699969	0.345082	0.607357	184	176
BRD7	-0.107072	0.147993	0.370903	184	184
BRD8	-0.133139	0.0715908	0.232683	184	184
BRD9	0.10063	0.174093	0.410272	184	184
BRDT	0.0597883	0.420126	0.674211	184	90
BREA2	0.0230882	0.755732	0.891654	184	184
BRE	-0.212636	0.00375674	0.0271088	184	184
BRF1	0.0997345	0.177978	0.415544	184	184
BRF2	-0.0234253	0.752281	0.889923	184	184
BRI3BP	-0.0993407	0.179706	0.417641	184	184
BRI3	0.0242167	0.744197	0.886307	184	184
BRIP1	0.0442637	0.550759	0.77001	184	184
BRIX1	-0.0212161	0.774985	0.900698	184	184
BRMS1L	0.13736	0.0629756	0.215153	184	184
BRMS1	0.106371	0.150681	0.374795	184	184
BRP44L	-0.223114	0.00233215	0.0186155	184	184
BRP44	-0.181705	0.0135661	0.0727229	184	184
BRPF1	-0.0776196	0.294966	0.55684	184	184
BRPF3	-0.0544996	0.462475	0.706618	184	184
BRS3	0.0169737	0.81911	0.922824	184	76
BRSK1	0.264428	0.000286495	0.00333142	184	184
BRSK2	-0.0472408	0.524259	0.751607	184	183
BRWD1	-0.0899785	0.22449	0.477389	184	184
BRWD3	-0.0949638	0.199747	0.44506	184	184
BSCL2	-0.0554502	0.454694	0.700868	184	184
BSDC1	-0.110768	0.134419	0.348866	184	184
BSG	0.079352	0.284288	0.545519	184	184
BSND	0.0686044	0.354787	0.616808	184	73
BSN	0.029168	0.694289	0.858695	184	184
BSPH1	-0.087877	0.235545	0.490628	184	4
BSPRY	-0.340373	2.27291e-06	5.32837e-05	184	184
BST1	0.281432	0.000108825	0.00149098	184	184
BST2	-0.0268303	0.717704	0.872502	184	184
BSX	0.108123	0.144032	0.364195	184	9
BTAF1	-0.0297143	0.688857	0.855286	184	184
BTBD10	-0.176331	0.0166494	0.0838785	184	184
BTBD11	-0.047274	0.523967	0.751456	184	184
BTBD12	-0.0792411	0.284963	0.546067	184	184
BTBD16	-0.106978	0.148351	0.371339	184	165
BTBD17	0.0387288	0.601699	0.804823	184	130
BTBD18	-0.0766886	0.300814	0.563386	184	184
BTBD19	0.40349	1.35308e-08	5.32248e-07	184	184
BTBD1	0.126311	0.0875352	0.266179	184	184
BTBD2	0.069166	0.350852	0.613174	184	184
BTBD3	0.0709925	0.338247	0.600413	184	184
BTBD6	0.100289	0.175568	0.412307	184	184
BTBD7	0.0377107	0.611294	0.811032	184	184
BTBD8	-0.0224298	0.762486	0.894847	184	181
BTBD9	-0.278691	0.000127743	0.00171516	184	184
BTC	-0.119107	0.107316	0.302751	184	181
BTD	-0.0348978	0.638145	0.825564	184	184
BTF3L1	0.0683306	0.356715	0.618425	184	18
BTF3L4	-0.023154	0.755057	0.891364	184	184
BTF3	-0.114632	0.12127	0.32626	184	184
BTG1	0.0186692	0.801399	0.914671	184	184
BTG2	-0.002384	0.974378	0.99011	184	184
BTG3	0.00637276	0.931581	0.972227	184	184
BTG4	0.058862	0.427376	0.680575	184	68
BTK	0.256848	0.00043229	0.00467328	184	184
BTLA	-0.0286769	0.699185	0.861522	184	184
BTN1A1	-0.0418076	0.573103	0.786153	184	153
BTN2A1	0.0658757	0.374294	0.636089	184	184
BTN2A2	0.0436465	0.556334	0.774438	184	184
BTN2A3	0.0892192	0.228441	0.482716	184	184
BTN3A1	0.0132007	0.858841	0.940722	184	184
BTN3A2	-0.00116916	0.987433	0.994764	184	184
BTN3A3	0.0421962	0.56954	0.783444	184	184
BTNL2	-0.01568	0.832686	0.928709	184	60
BTNL3	-0.104861	0.156594	0.38411	184	140
BTNL8	-0.0488129	0.510531	0.743625	184	167
BTNL9	-0.0604702	0.414835	0.669829	184	184
BTRC	-0.220568	0.0026238	0.0204502	184	184
BUB1B	0.112415	0.128687	0.339089	184	184
BUB1	0.0711435	0.337218	0.599644	184	184
BUB3	-0.0205171	0.78221	0.90445	184	184
BUD13	-0.134235	0.0692661	0.228019	184	184
BUD31	-0.0534521	0.471135	0.712897	184	184
BVES	0.433724	7.73325e-10	3.90345e-08	184	184
BYSL	0.0566072	0.445322	0.693481	184	184
BZRAP1	0.0312701	0.673477	0.847687	184	184
BZW1	-0.0295041	0.690945	0.856804	184	184
BZW2	0.0392887	0.596452	0.801047	184	184
C10orf105	0.0401375	0.588536	0.795426	184	183
C10orf107	0.234632	0.0013465	0.0119993	184	157
C10orf108	-0.043618	0.556592	0.774476	184	181
C10orf10	0.183554	0.0126272	0.0689754	184	184
C10orf110	-0.0663866	0.370593	0.632039	184	184
C10orf111	-0.228026	0.00185113	0.0155212	184	184
C10orf113	-0.191844	0.00908486	0.0539255	184	87
C10orf114	0.338382	2.62596e-06	5.98944e-05	184	184
C10orf116	-0.343973	1.7462e-06	4.23208e-05	184	184
C10orf118	-0.105474	0.154173	0.380156	184	184
C10orf119	-0.0862548	0.244337	0.500605	184	184
C10orf11	0.146542	0.0471473	0.176693	184	183
C10orf120	0.026618	0.719844	0.873414	184	41
C10orf122	0.0265363	0.720668	0.873721	184	29
C10orf125	0.0637072	0.390257	0.650052	184	184
C10orf128	0.155369	0.0352066	0.1445	184	182
C10orf129	-0.168343	0.0223547	0.104533	184	72
C10orf12	-0.177397	0.0159932	0.0814623	184	184
C10orf131	0.0319126	0.667165	0.843988	184	149
C10orf137	-0.0499767	0.500491	0.736449	184	184
C10orf140	0.128943	0.0810825	0.252838	184	184
C10orf18	-0.0308611	0.677508	0.849752	184	184
C10orf25	0.214413	0.00347027	0.0254799	184	184
C10orf26	0.106714	0.14936	0.372891	184	184
C10orf27	0.118892	0.107955	0.304045	184	126
C10orf28	-0.149529	0.0427759	0.164907	184	184
C10orf2	-0.0758868	0.305911	0.568258	184	184
C10orf32	0.0317961	0.668307	0.844663	184	184
C10orf35	0.0112174	0.879874	0.950314	184	184
C10orf40	-0.0292174	0.693797	0.858449	184	28
C10orf41	-0.0314407	0.671799	0.846738	184	184
C10orf46	0.00364233	0.960863	0.984455	184	184
C10orf47	-0.0518632	0.484438	0.723293	184	184
C10orf4	-0.0984041	0.183865	0.423931	184	184
C10orf50	-0.0122892	0.868496	0.945594	184	93
C10orf53	-0.0171308	0.817465	0.92208	184	38
C10orf54	-0.0736753	0.320261	0.582635	184	184
C10orf55	0.271149	0.000196896	0.0024539	184	184
C10orf57	-0.17427	0.0179842	0.0886664	184	184
C10orf58	-0.0586221	0.429265	0.682212	184	184
C10orf62	-0.0328119	0.658367	0.838686	184	124
C10orf67	0.05296	0.475233	0.716139	184	161
C10orf68	-0.136774	0.0641173	0.217504	184	175
C10orf71	0.04433	0.550162	0.769932	184	59
C10orf72	0.50724	2.01348e-13	2.09028e-11	184	184
C10orf75	-0.106697	0.149424	0.373005	184	184
C10orf76	-0.284023	9.33739e-05	0.00131049	184	184
C10orf78	0.0246372	0.739913	0.883874	184	184
C10orf79	-0.0354232	0.633092	0.822541	184	183
C10orf81	-0.0481861	0.515982	0.747026	184	181
C10orf82	0.0610307	0.410516	0.666381	184	135
C10orf84	-0.0647607	0.382452	0.643275	184	184
C10orf88	0.0287149	0.698806	0.861237	184	184
C10orf90	0.095453	0.19743	0.442197	184	131
C10orf91	-0.0449935	0.544203	0.765961	184	182
C10orf93	0.0173713	0.814948	0.920906	184	133
C10orf95	-0.292984	5.43523e-05	0.000824584	184	184
C10orf96	-0.0133747	0.857	0.940253	184	9
C10orf99	-0.116413	0.115557	0.316476	184	158
C11orf10	-0.0581582	0.432932	0.684453	184	184
C11orf16	-0.114437	0.12191	0.327545	184	150
C11orf17	-0.0299901	0.686122	0.853731	184	184
C11orf1	-0.13264	0.0726698	0.235074	184	184
C11orf20	0.0572285	0.440335	0.689714	184	173
C11orf21	0.0224299	0.762485	0.894847	184	177
C11orf24	0.28403	9.33372e-05	0.00131049	184	184
C11orf2	0.046142	0.533964	0.758204	184	184
C11orf30	0.0547378	0.460518	0.705794	184	184
C11orf31	0.0380755	0.607848	0.808965	184	184
C11orf34	-0.0277699	0.708259	0.866683	184	148
C11orf35	-0.226027	0.00203473	0.0167263	184	184
C11orf36	0.0763922	0.302691	0.56533	184	25
C11orf40	-0.0771544	0.297879	0.560366	184	8
C11orf41	0.241175	0.000973831	0.00921229	184	184
C11orf42	-0.079489	0.283455	0.54473	184	173
C11orf45	0.0718225	0.332615	0.594714	184	184
C11orf46	-0.0107963	0.884352	0.952146	184	184
C11orf48	-0.164793	0.0253888	0.11464	184	184
C11orf49	-0.0721562	0.330368	0.592379	184	184
C11orf51	-0.0407852	0.582528	0.792228	184	184
C11orf52	-0.180906	0.0139901	0.0743235	184	184
C11orf53	-0.146626	0.0470201	0.176347	184	157
C11orf54	-0.148128	0.0447821	0.170526	184	184
C11orf57	-0.0956522	0.196492	0.440881	184	184
C11orf58	-0.0270348	0.715645	0.871464	184	184
C11orf59	-0.0412967	0.577803	0.789535	184	184
C11orf61	-0.000121099	0.998698	0.999393	184	184
C11orf63	0.117466	0.112281	0.311223	184	184
C11orf64	-0.101294	0.171255	0.406487	184	5
C11orf65	-0.0344841	0.642135	0.828163	184	184
C11orf66	-0.0397654	0.592	0.798265	184	181
C11orf67	0.060576	0.414018	0.669206	184	184
C11orf68	0.160274	0.0297565	0.128082	184	184
C11orf70	0.0728278	0.325874	0.587934	184	184
C11orf71	-0.154109	0.0367361	0.148866	184	184
C11orf73	0.0543868	0.463404	0.707257	184	184
C11orf74	0.0180847	0.807493	0.917659	184	184
C11orf75	-0.061911	0.403786	0.660485	184	184
C11orf80	-0.0218966	0.76797	0.897909	184	184
C11orf82	0.0261747	0.724319	0.875465	184	184
C11orf83	-0.168352	0.0223481	0.104526	184	184
C11orf84	0.187541	0.0107952	0.0614864	184	184
C11orf85	0.017659	0.81194	0.919349	184	69
C11orf86	-0.15986	0.0301866	0.129302	184	136
C11orf87	0.0355093	0.632265	0.821862	184	153
C11orf88	0.0238813	0.747619	0.887661	184	150
C11orf90	-0.023342	0.753133	0.890364	184	163
C11orf92	-0.138343	0.0610954	0.211093	184	184
C11orf93	-0.160335	0.0296933	0.12789	184	184
C11orf94	-0.0469837	0.526521	0.753497	184	36
C11orf95	0.285534	8.53412e-05	0.00122072	184	184
C11orf9	-0.112399	0.128741	0.339156	184	184
C12orf10	0.0669001	0.366895	0.628125	184	184
C12orf11	-0.0305063	0.681012	0.851397	184	184
C12orf12	-0.0333464	0.653161	0.834785	184	40
C12orf23	0.398745	2.06761e-08	7.78349e-07	184	184
C12orf24	0.135734	0.0661875	0.221431	184	184
C12orf26	-0.137556	0.0625976	0.21446	184	184
C12orf27	-0.0967233	0.191504	0.434443	184	166
C12orf29	-0.174594	0.0177684	0.0878903	184	184
C12orf32	-0.178014	0.015624	0.0801291	184	184
C12orf34	0.0219271	0.767656	0.897828	184	184
C12orf35	-0.157797	0.0324116	0.136334	184	184
C12orf36	-0.12795	0.0834716	0.257921	184	181
C12orf39	-0.00716909	0.923056	0.969503	184	38
C12orf40	-0.0730058	0.32469	0.587061	184	71
C12orf41	-0.0339219	0.647574	0.830868	184	184
C12orf42	-0.0836488	0.258934	0.515767	184	162
C12orf43	0.0931702	0.208411	0.457016	184	184
C12orf44	-0.0107269	0.885091	0.952382	184	184
C12orf45	-0.0109747	0.882455	0.951171	184	184
C12orf47	-0.128824	0.0813669	0.253477	184	184
C12orf48	-0.0768271	0.299939	0.562455	184	184
C12orf49	0.0480972	0.516757	0.747421	184	184
C12orf4	-0.059766	0.4203	0.674274	184	184
C12orf50	0.170259	0.0208518	0.0991395	184	68
C12orf51	-0.150004	0.042113	0.163343	184	184
C12orf52	-0.104778	0.156924	0.384553	184	184
C12orf53	0.251082	0.000586299	0.00605541	184	184
C12orf54	-0.0302848	0.683203	0.852152	184	120
C12orf56	-0.0108256	0.88404	0.951912	184	160
C12orf57	0.0791787	0.285344	0.546432	184	184
C12orf59	0.240353	0.00101479	0.00954271	184	181
C12orf5	0.00867654	0.906944	0.961545	184	184
C12orf60	-0.0412155	0.578552	0.790058	184	184
C12orf61	-0.0703279	0.3428	0.605082	184	184
C12orf62	-0.065147	0.379614	0.640619	184	184
C12orf63	0.0636486	0.390694	0.650352	184	151
C12orf65	-0.0315672	0.670555	0.84585	184	184
C12orf66	-0.104144	0.159464	0.388391	184	184
C12orf68	0.268334	0.000230661	0.00279682	184	184
C12orf69	0.0155513	0.83404	0.9294	184	179
C12orf70	0.0780623	0.292212	0.554001	184	179
C12orf71	-0.0828548	0.263498	0.521901	184	147
C12orf72	-0.116526	0.115202	0.315885	184	184
C12orf73	0.00613296	0.934149	0.973232	184	184
C12orf74	-0.256421	0.000442271	0.00477093	184	156
C12orf75	0.142817	0.0531147	0.191502	184	184
C12orf76	0.0842691	0.255406	0.512186	184	184
C12orf77	0.0231014	0.755597	0.891654	184	65
C13orf15	0.346626	1.43485e-06	3.55446e-05	184	184
C13orf16	0.372893	1.85869e-07	5.63765e-06	184	144
C13orf18	0.370945	2.17649e-07	6.48439e-06	184	184
C13orf1	-0.0705345	0.34138	0.603688	184	184
C13orf23	-0.176259	0.0166943	0.0840348	184	184
C13orf26	-0.0404256	0.58586	0.793901	184	29
C13orf27	0.0501926	0.498639	0.735015	184	184
C13orf29	0.194374	0.00819544	0.0499292	184	184
C13orf30	0.0704506	0.341956	0.604091	184	122
C13orf31	-0.00156702	0.983157	0.993313	184	184
C13orf33	0.338775	2.55246e-06	5.84829e-05	184	184
C13orf34	-0.0526635	0.477712	0.717972	184	184
C13orf35	-0.0717889	0.332841	0.594961	184	96
C13orf36	-0.0381166	0.60746	0.808698	184	70
C13orf37	-0.000821457	0.99117	0.995933	184	184
C13orf38	-0.0111894	0.880173	0.95039	184	147
C13orf39	0.126144	0.0879605	0.266908	184	45
C14orf101	0.148326	0.0444939	0.16975	184	184
C14orf102	0.127385	0.0848539	0.260671	184	184
C14orf104	-0.0528291	0.476327	0.717197	184	184
C14orf105	-0.089035	0.229407	0.483601	184	130
C14orf106	0.0502157	0.498442	0.73488	184	184
C14orf109	0.121674	0.0998997	0.289001	184	184
C14orf115	-0.124414	0.0924378	0.275203	184	135
C14orf118	0.218756	0.00285117	0.0218669	184	184
C14orf119	0.123039	0.0961246	0.282662	184	184
C14orf126	0.0692222	0.35046	0.612856	184	184
C14orf128	-0.0794353	0.283781	0.54515	184	184
C14orf129	-0.199088	0.00674175	0.0427785	184	184
C14orf132	0.24869	0.000663974	0.00672195	184	184
C14orf135	0.24191	0.000938514	0.00894965	184	184
C14orf138	0.0354491	0.632843	0.822447	184	184
C14orf139	0.225746	0.00206182	0.0169145	184	184
C14orf142	0.108204	0.143728	0.363607	184	184
C14orf143	0.0585397	0.429915	0.682415	184	184
C14orf145	0.15255	0.0387061	0.154151	184	184
C14orf147	0.044017	0.552984	0.771748	184	184
C14orf148	0.0767069	0.300698	0.563267	184	184
C14orf149	0.255165	0.000472838	0.00502796	184	184
C14orf153	0.116346	0.115768	0.316833	184	184
C14orf156	-0.0517645	0.48527	0.723844	184	184
C14orf159	0.0400431	0.589414	0.796088	184	184
C14orf162	-0.0678056	0.360431	0.622615	184	151
C14orf165	-0.00754102	0.919078	0.968108	184	35
C14orf166B	-0.0342966	0.643947	0.829491	184	67
C14orf166	0.0412692	0.578057	0.789721	184	184
C14orf167	-0.0342404	0.64449	0.82966	184	184
C14orf169	0.103572	0.161778	0.39213	184	184
C14orf174	0.241408	0.000962479	0.00911862	184	184
C14orf176	-0.251208	0.000582467	0.00602201	184	184
C14orf177	-0.0634979	0.391819	0.65077	184	18
C14orf178	0.111966	0.130231	0.341741	184	147
C14orf179	0.142857	0.0530469	0.191381	184	184
C14orf180	-0.0740733	0.317647	0.580031	184	31
C14orf181	-0.171593	0.0198571	0.0955381	184	184
C14orf182	-0.0903542	0.222553	0.47471	184	184
C14orf183	0.000562026	0.993959	0.997326	184	99
C14orf184	-0.0918239	0.215089	0.466091	184	172
C14orf19	0.00424914	0.95435	0.981996	184	184
C14orf1	-0.175197	0.0173726	0.0864203	184	184
C14orf21	-0.00256726	0.972409	0.989298	184	184
C14orf23	0.0771249	0.298064	0.560557	184	67
C14orf28	0.0580628	0.433688	0.684896	184	184
C14orf2	-0.0992307	0.180191	0.41843	184	184
C14orf33	0.101494	0.170411	0.405299	184	184
C14orf34	0.0189323	0.798659	0.912949	184	180
C14orf37	0.32181	8.40622e-06	0.000165333	184	184
C14orf39	0.116982	0.113776	0.313426	184	83
C14orf43	0.154014	0.0368543	0.149135	184	184
C14orf45	0.10638	0.150645	0.374795	184	184
C14orf48	0.17041	0.0207368	0.0987558	184	41
C14orf49	0.32342	7.53009e-06	0.000151052	184	184
C14orf4	0.153718	0.0372214	0.150034	184	184
C14orf50	-0.0672164	0.364629	0.626589	184	181
C14orf53	-0.0226571	0.760153	0.893869	184	45
C14orf64	-0.0310461	0.675684	0.848872	184	181
C14orf68	-0.0744662	0.31508	0.577514	184	148
C14orf70	0.0381026	0.607592	0.808784	184	21
C14orf72	-0.0826158	0.264883	0.523218	184	180
C14orf73	-0.0762161	0.303811	0.566272	184	183
C14orf79	0.060595	0.413871	0.669185	184	184
C14orf80	0.10695	0.148458	0.371514	184	184
C14orf86	0.00407273	0.956243	0.982739	184	52
C14orf93	-0.0784193	0.290004	0.551911	184	184
C15orf17	-0.211627	0.00392873	0.0281002	184	184
C15orf21	0.0137077	0.853478	0.938216	184	184
C15orf23	0.137808	0.0621134	0.213417	184	184
C15orf24	0.0542633	0.464421	0.707897	184	184
C15orf26	0.365822	3.28076e-07	9.41239e-06	184	164
C15orf27	0.0591207	0.425344	0.67901	184	184
C15orf28	-0.0657882	0.374931	0.636769	184	184
C15orf29	-0.146802	0.0467531	0.17585	184	184
C15orf2	-0.036463	0.623143	0.817662	184	67
C15orf32	-0.0716561	0.333739	0.595984	184	25
C15orf33	-0.00809957	0.913107	0.964879	184	182
C15orf34	-0.0639547	0.388415	0.648735	184	184
C15orf37	0.0650897	0.380034	0.641136	184	184
C15orf38	0.127429	0.0847473	0.260551	184	184
C15orf39	-0.0640955	0.387369	0.648136	184	184
C15orf40	-0.0653998	0.377763	0.638865	184	184
C15orf41	-0.18244	0.0131858	0.0712154	184	184
C15orf42	0.0461993	0.533456	0.75794	184	184
C15orf43	0.0148448	0.841478	0.93328	184	27
C15orf44	-0.0762402	0.303657	0.566107	184	184
C15orf48	-0.184839	0.0120093	0.0666666	184	184
C15orf50	-0.0270372	0.715621	0.871464	184	60
C15orf51	0.0860971	0.245204	0.501056	184	163
C15orf52	-0.0433601	0.55893	0.776227	184	184
C15orf53	0.153867	0.0370365	0.14969	184	131
C15orf54	0.370679	2.22376e-07	6.60568e-06	184	174
C15orf55	-0.128717	0.0816207	0.254007	184	173
C15orf56	-0.0972956	0.188877	0.430388	184	180
C15orf57	0.0773466	0.296673	0.558724	184	184
C15orf58	-0.125884	0.0886209	0.267911	184	184
C15orf59	0.0121846	0.869605	0.945992	184	184
C15orf5	0.0625857	0.398672	0.656199	184	181
C15orf60	-0.00102478	0.988985	0.995185	184	109
C15orf61	-0.0287696	0.69826	0.860962	184	184
C15orf62	-0.33493	3.36508e-06	7.4887e-05	184	184
C15orf63	-0.117442	0.112354	0.311297	184	184
C16orf11	-0.130567	0.077295	0.244877	184	104
C16orf13	-0.0106321	0.886099	0.952996	184	184
C16orf3	-0.0879598	0.235103	0.48996	184	182
C16orf42	0.0320252	0.66606	0.843631	184	184
C16orf45	0.365229	3.43889e-07	9.82401e-06	184	184
C16orf46	0.122762	0.0968828	0.28402	184	184
C16orf48	0.0435616	0.557103	0.77491	184	184
C16orf52	0.055116	0.457421	0.703134	184	184
C16orf53	-0.0710004	0.338193	0.600371	184	184
C16orf54	0.14466	0.0500876	0.184317	184	184
C16orf55	0.0701602	0.343955	0.606377	184	184
C16orf57	0.296409	4.39864e-05	0.000687792	184	184
C16orf58	-0.0239903	0.746506	0.887261	184	184
C16orf59	0.065656	0.375894	0.637376	184	184
C16orf5	0.0585989	0.429448	0.682212	184	184
C16orf61	0.0387426	0.60157	0.804704	184	184
C16orf62	0.0814266	0.271846	0.530878	184	184
C16orf63	-0.153715	0.0372253	0.150034	184	184
C16orf68	0.0865808	0.242552	0.498673	184	184
C16orf70	-0.0625711	0.398782	0.656273	184	184
C16orf71	-0.026564	0.720389	0.873721	184	184
C16orf72	-0.031995	0.666357	0.843715	184	184
C16orf73	0.0782208	0.291231	0.552928	184	139
C16orf74	0.0227241	0.759465	0.893657	184	184
C16orf75	-0.142299	0.0539923	0.193557	184	184
C16orf78	-0.0175463	0.813118	0.91997	184	11
C16orf79	-0.0129895	0.861076	0.941838	184	184
C16orf7	-0.147419	0.0458266	0.173356	184	184
C16orf80	0.101514	0.170324	0.40519	184	184
C16orf81	0.0104379	0.888165	0.954252	184	116
C16orf82	0.0270544	0.715447	0.871464	184	38
C16orf86	0.0748566	0.312542	0.574865	184	184
C16orf87	0.156543	0.0338305	0.140542	184	184
C16orf88	-0.0222391	0.764447	0.896043	184	184
C16orf89	-0.0675887	0.361972	0.62392	184	173
C16orf90	0.0116754	0.875009	0.947762	184	108
C16orf91	-0.0586434	0.429097	0.682101	184	184
C16orf92	-0.0374282	0.613968	0.812812	184	34
C16orf93	-0.00567836	0.939021	0.975214	184	184
C17orf100	-0.00611482	0.934344	0.973232	184	184
C17orf101	0.00603044	0.935248	0.973632	184	184
C17orf102	-0.0152413	0.837302	0.930714	184	32
C17orf103	0.0428461	0.563604	0.779708	184	184
C17orf104	0.0536143	0.469788	0.711827	184	184
C17orf105	0.0168195	0.820726	0.923947	184	26
C17orf106	-0.133528	0.0707599	0.231085	184	184
C17orf107	0.165017	0.0251873	0.114199	184	184
C17orf108	-0.125867	0.0886643	0.267962	184	184
C17orf28	-0.18493	0.0119662	0.066501	184	184
C17orf37	-0.121629	0.100028	0.289115	184	184
C17orf39	-0.140982	0.0562761	0.199157	184	184
C17orf42	-0.148052	0.0448932	0.170755	184	184
C17orf44	0.0200721	0.786819	0.907176	184	184
C17orf46	-0.0452354	0.542038	0.764471	184	178
C17orf47	0.0848014	0.252406	0.508817	184	177
C17orf48	0.0159041	0.830331	0.927536	184	184
C17orf49	0.132392	0.0732115	0.236066	184	184
C17orf50	0.00647397	0.930497	0.971737	184	158
C17orf51	0.261908	0.000328926	0.00374269	184	184
C17orf53	-0.0406851	0.583454	0.792854	184	184
C17orf54	-0.0426483	0.565407	0.780854	184	69
C17orf55	-0.068563	0.355078	0.617063	184	180
C17orf56	-0.0880047	0.234863	0.489697	184	184
C17orf57	-0.015487	0.834716	0.929647	184	184
C17orf58	-0.0662401	0.371652	0.633201	184	184
C17orf59	-0.0514181	0.4882	0.726654	184	184
C17orf60	0.237503	0.00116929	0.010714	184	183
C17orf61	-0.0431392	0.560936	0.777727	184	184
C17orf62	0.0929452	0.209517	0.45841	184	184
C17orf63	-0.189949	0.00980631	0.0569983	184	184
C17orf64	-0.0186951	0.801128	0.914512	184	85
[truncated: 18,141 more rows]

## Sheet: Table S8
Input ID	Gene ID	Type	Tax ID	Homologene Gene ID	Homologene Gene Tax ID	Gene Symbol	Description	Biological Process (GO)	Kinase Class (UniProt)	Protein Function (Protein Atlas)	Subcellular Location (Protein Atlas)	Drug (DrugBank)	Canonical Pathways	Hallmark Gene Sets	GO:0030198 extracellular matrix organizat	GO:0001568 blood vessel development	R-HSA-1474290 Collagen formation	GO:0030335 positive regulation of cell mi	M5885 NABA MATRISOME ASSOCIATED	M18 PID INTEGRIN1 PATHWAY	GO:0030155 regulation of cell adhesion	GO:0070848 response to growth factor	GO:0001501 skeletal system development	GO:0009611 response to wounding	GO:0030199 collagen fibril organization	GO:0001503 ossification	GO:0048729 tissue morphogenesis	GO:0000904 cell morphogenesis involved in	GO:0097435 supramolecular fiber organizat	M53 PID INTEGRIN3 PATHWAY	GO:0007507 heart development	GO:0060485 mesenchyme development	GO:0090287 regulation of cellular respons	GO:0048598 embryonic morphogenesis
ABCA1	19	symbol	H. sapiens	19	H. sapiens	ABCA1	ATP binding cassette subfamily A member 1	GO:0090108 positive regulation of high-density lipoprotein particle assembly;GO:0090107 regulation of high-density lipoprotein particle assembly;GO:0010875 positive regulation of cholesterol efflux		Transporters/Primary Active Transporters	Nucleoplasm;Vesicles(Approved)	Adenosine triphosphate (Syntaxin binding);Glyburide (Syntaxin binding);Probucol (Syntaxin binding)	(M162)PID RXR VDR PATHWAY	(M5910)HALLMARK PROTEIN SECRETION; (M5948)HALLMARK BILE ACID METABOLISM; (M5905)HALLMARK ADIPOGENESIS	1.0	0.0	0.0	0.0	0.0	0.0	0.0	0.0	0.0	0.0	0.0	0.0	0.0	0.0	1.0	0.0	0.0	0.0	0.0	0.0
ABCC9	10060	symbol	H. sapiens	10060	H. sapiens	ABCC9	ATP binding cassette subfamily C member 9	GO:1903779 regulation of cardiac conduction;GO:1990573 potassium ion import across plasma membrane;GO:0010107 potassium ion import		Transporters/Primary Active Transporters	Cytosol;Nucleoplasm(Approved)	Adenosine triphosphate (Transporter activity);Glyburide (Transporter activity)			0.0	0.0	0.0	0.0	0.0	0.0	0.0	0.0	0.0	0.0	0.0	0.0	0.0	0.0	0.0	0.0	0.0	0.0	0.0	0.0
ABL1	25	symbol	H. sapiens	25	H. sapiens	ABL1	ABL proto-oncogene 1, non-receptor tyrosine kinase	GO:0002333 transitional one stage B cell differentiation;GO:0051281 positive regulation of release of sequestered calcium ion into cytosol;GO:0002332 transitional stage B cell differentiation	Tyr protein kinase family	Enzymes/{ENZYME proteins/Transferases,Kinases/Tyr protein kinases};RAS pathway related proteins	Nucleoplasm(Enhanced)Nuclear bodies(Supported)	Adenosine triphosphate (Syntaxin binding);Imatinib (Syntaxin binding);Dasatinib (Syntaxin binding);N-[4-Methyl-3-[[4-(3-Pyridinyl)-2-Pyrimidinyl]Amino]Phenyl]-3-Pyridinecarboxamide (Syntaxin binding);Nilotinib (Syntaxin binding);XL228 (Syntaxin binding);Bosutinib (Syntaxin binding);2-{[(6-OXO-1,6-DIHYDROPYRIDIN-3-YL)METHYL]AMINO}-N-[4-PROPYL-3-(TRIFLUOROMETHYL)PHENYL]BENZAMIDE (Syntaxin binding);…	(M163)PID LIS1 PATHWAY; (M84)PID ATM PATHWAY; (M142)PID AJDISS 2PATHWAY	(M5893)HALLMARK MITOTIC SPINDLE; (M5901)HALLMARK G2M CHECKPOINT	1.0	1.0	0.0	1.0	0.0	0.0	1.0	1.0	0.0	0.0	0.0	0.0	1.0	1.0	1.0	0.0	1.0	0.0	1.0	1.0
ABL2	27	symbol	H. sapiens	27	H. sapiens	ABL2	ABL proto-oncogene 2, non-receptor tyrosine kinase	GO:0010863 positive regulation of phospholipase C activity;GO:0035024 negative regulation of Rho protein signal transduction;GO:1900274 regulation of phospholipase C activity	Tyr protein kinase family	Enzymes/{ENZYME proteins/Transferases,Kinases/Tyr protein kinases};RAS pathway related proteins	Nucleoplasm(Supported)	Adenosine triphosphate (Receptor binding);Dasatinib (Receptor binding);XL228 (Receptor binding);5-AMINO-3-{[4-(AMINOSULFONYL)PHENYL]AMINO}-N-(2,6-DIFLUOROPHENYL)-1H-1,2,4-TRIAZOLE-1-CARBOTHIOAMIDE (Receptor binding)			0.0	0.0	0.0	0.0	0.0	0.0	1.0	0.0	0.0	0.0	0.0	0.0	0.0	1.0	1.0	0.0	0.0	0.0	0.0	0.0
ACAN	176	symbol	H. sapiens	176	H. sapiens	ACAN	aggrecan	GO:0042340 keratan sulfate catabolic process;GO:0018146 keratan sulfate biosynthetic process;GO:0042339 keratan sulfate metabolic process				GM6001 (Metal ion binding)	(M5882)NABA PROTEOGLYCANS; (M5884)NABA CORE MATRISOME; (M5889)NABA MATRISOME		1.0	0.0	1.0	0.0	0.0	1.0	0.0	0.0	1.0	0.0	1.0	0.0	0.0	0.0	1.0	0.0	1.0	0.0	0.0	0.0
ACOT9	23597	symbol	H. sapiens	23597	H. sapiens	ACOT9	acyl-CoA thioesterase 9	GO:0006637 acyl-CoA metabolic process;GO:0033875 ribonucleoside bisphosphate metabolic process;GO:0034032 purine nucleoside bisphosphate metabolic process			Cytosol;Nucleoplasm;Plasma membrane(Approved)				0.0	0.0	0.0	0.0	0.0	0.0	0.0	0.0	0.0	0.0	0.0	0.0	0.0	0.0	0.0	0.0	0.0	0.0	0.0	0.0
ACTA2	59	symbol	H. sapiens	59	H. sapiens	ACTA2	actin alpha 2, smooth muscle	GO:0072144 glomerular mesangial cell development;GO:0072008 glomerular mesangial cell differentiation;GO:0072143 mesangial cell development			Actin filaments(Supported)		(M186)PID PDGFRB PATHWAY	(M5930)HALLMARK EPITHELIAL MESENCHYMAL TRANSITION	0.0	1.0	0.0	0.0	0.0	0.0	0.0	0.0	1.0	0.0	0.0	0.0	1.0	1.0	0.0	0.0	0.0	1.0	0.0	0.0
ACTN1	87	symbol	H. sapiens	87	H. sapiens	ACTN1	actinin alpha 1	GO:0030220 platelet formation;GO:0051639 actin filament network formation;GO:0051764 actin crosslink formation			Focal adhesion sites;Plasma membrane(Approved)		(M165)PID SYNDECAN 4 PATHWAY; (M232)PID ECADHERIN STABILIZATION PATHWAY; (M71)PID ILK PATHWAY	(M5908)HALLMARK ANDROGEN RESPONSE; (M5915)HALLMARK APICAL JUNCTION	1.0	0.0	0.0	0.0	0.0	1.0	1.0	0.0	0.0	1.0	0.0	0.0	0.0	1.0	1.0	0.0	0.0	0.0	0.0	0.0
ACVR1	90	symbol	H. sapiens	90	H. sapiens	ACVR1	activin A receptor type 1	GO:0061445 endocardial cushion cell fate commitment;GO:1905007 positive regulation of epithelial to mesenchymal transition involved in endocardial cushion formation;GO:0060957 endocardial cell fate commitment	TKL Ser/Thr protein kinase family	Enzymes/{ENZYME proteins/Transferases,Kinases/TKL Ser/Thr protein kinases}	Cytosol;Nucleoli(Approved)	Adenosine triphosphate (Transmembrane receptor protein serine/threonine kinase activity);6-[4-(2-piperidin-1-ylethoxy)phenyl]-3-pyridin-4-ylpyrazolo[1,5-a]pyrimidine (Transmembrane receptor protein serine/threonine kinase activity)	(M203)PID ALK2 PATHWAY; (M185)PID ALK1 PATHWAY	(M5896)HALLMARK TGF BETA SIGNALING	0.0	1.0	0.0	1.0	0.0	0.0	0.0	1.0	0.0	0.0	0.0	1.0	1.0	0.0	0.0	0.0	1.0	1.0	1.0	1.0
ACVRL1	94	symbol	H. sapiens	94	H. sapiens	ACVRL1	activin A receptor like type 1	GO:0035912 dorsal aorta morphogenesis;GO:0035313 wound healing, spreading of epidermal cells;GO:0051895 negative regulation of focal adhesion assembly	TKL Ser/Thr protein kinase family	Enzymes/{ENZYME proteins/Transferases,Kinases/TKL Ser/Thr protein kinases}		Adenosine triphosphate (Transmembrane receptor protein serine/threonine kinase activity)	(M185)PID ALK1 PATHWAY	(M5897)HALLMARK IL6 JAK STAT3 SIGNALING	0.0	1.0	0.0	0.0	0.0	0.0	1.0	1.0	1.0	1.0	0.0	0.0	1.0	1.0	0.0	0.0	1.0	1.0	1.0	1.0
ADAM12	8038	symbol	H. sapiens	8038	H. sapiens	ADAM12	ADAM metallopeptidase domain 12	GO:0045766 positive regulation of angiogenesis;GO:0007520 myoblast fusion;GO:0045765 regulation of angiogenesis		Transporters/Accessory Factors Involved in Transport	Plasma membrane(Supported)		(M118)PID INTEGRIN A9B1 PATHWAY; (M165)PID SYNDECAN 4 PATHWAY; (M17)PID NOTCH PATHWAY	(M5930)HALLMARK EPITHELIAL MESENCHYMAL TRANSITION; (M5909)HALLMARK MYOGENESIS	1.0	1.0	0.0	0.0	1.0	1.0	0.0	0.0	0.0	0.0	0.0	0.0	0.0	0.0	0.0	0.0	1.0	0.0	0.0	0.0
ADAM19	8728	symbol	H. sapiens	8728	H. sapiens	ADAM19	ADAM metallopeptidase domain 19	GO:2000049 positive regulation of cell-cell adhesion mediated by cadherin;GO:2000047 regulation of cell-cell adhesion mediated by cadherin;GO:0044331 cell-cell adhesion mediated by cadherin			Vesicles(Approved)		(M3468)NABA ECM REGULATORS; (M5885)NABA MATRISOME ASSOCIATED; (M5889)NABA MATRISOME	(M5947)HALLMARK IL2 STAT5 SIGNALING	1.0	0.0	0.0	0.0	1.0	0.0	1.0	0.0	0.0	0.0	0.0	0.0	0.0	0.0	0.0	0.0	0.0	0.0	0.0	0.0
ADAMTS10	81794	symbol	H. sapiens	81794	H. sapiens	ADAMTS10	ADAM metallopeptidase with thrombospondin type 1 motif 10	GO:0006508 proteolysis;GO:0019538 protein metabolic process;GO:1901564 organonitrogen compound metabolic process			Cytosol(Uncertain)		(M3468)NABA ECM REGULATORS; (M5885)NABA MATRISOME ASSOCIATED; (M5889)NABA MATRISOME		0.0	0.0	0.0	0.0	1.0	0.0	0.0	0.0	0.0	0.0	0.0	0.0	0.0	0.0	0.0	0.0	0.0	0.0	0.0	0.0
ADAMTS12	81792	symbol	H. sapiens	81792	H. sapiens	ADAMTS12	ADAM metallopeptidase with thrombospondin type 1 motif 12	GO:2001113 negative regulation of cellular response to hepatocyte growth factor stimulus;GO:1902203 negative regulation of hepatocyte growth factor receptor signaling pathway;GO:2001112 regulation of cellular response to hepatocyte growth factor stimulus			Mitochondria;Nucleoli(Approved)		(M3468)NABA ECM REGULATORS; (M5885)NABA MATRISOME ASSOCIATED; (M5889)NABA MATRISOME		0.0	0.0	0.0	0.0	1.0	0.0	1.0	1.0	1.0	0.0	0.0	0.0	1.0	0.0	0.0	0.0	0.0	0.0	1.0	0.0
ADAMTS14	140766	symbol	H. sapiens	140766	H. sapiens	ADAMTS14	ADAM metallopeptidase with thrombospondin type 1 motif 14	GO:0030199 collagen fibril organization;GO:0030574 collagen catabolic process;GO:0032963 collagen metabolic process			Cytosol(Uncertain)		(M3468)NABA ECM REGULATORS; (M5885)NABA MATRISOME ASSOCIATED; (M5889)NABA MATRISOME		1.0	0.0	1.0	0.0	1.0	0.0	0.0	0.0	0.0	0.0	1.0	0.0	0.0	0.0	1.0	0.0	0.0	0.0	0.0	0.0
ADAMTS16	170690	symbol	H. sapiens	170690	H. sapiens	ADAMTS16	ADAM metallopeptidase with thrombospondin type 1 motif 16	GO:0001658 branching involved in ureteric bud morphogenesis;GO:0060675 ureteric bud morphogenesis;GO:0072171 mesonephric tubule morphogenesis					(M3468)NABA ECM REGULATORS; (M5885)NABA MATRISOME ASSOCIATED; (M5889)NABA MATRISOME		1.0	0.0	1.0	0.0	1.0	0.0	0.0	0.0	0.0	0.0	0.0	0.0	1.0	1.0	0.0	0.0	0.0	0.0	0.0	0.0
ADAMTS1	9510	symbol	H. sapiens	9510	H. sapiens	ADAMTS1	ADAM metallopeptidase with thrombospondin type 1 motif 1	GO:1904754 positive regulation of vascular associated smooth muscle cell migration;GO:0001542 ovulation from ovarian follicle;GO:1904752 regulation of vascular associated smooth muscle cell migration					(M3468)NABA ECM REGULATORS; (M5885)NABA MATRISOME ASSOCIATED; (M5889)NABA MATRISOME	(M5908)HALLMARK ANDROGEN RESPONSE	1.0	0.0	1.0	1.0	1.0	0.0	0.0	0.0	0.0	0.0	0.0	0.0	0.0	0.0	0.0	0.0	1.0	0.0	0.0	0.0
ADAMTS2	9509	symbol	H. sapiens	9509	H. sapiens	ADAMTS2	ADAM metallopeptidase with thrombospondin type 1 motif 2	GO:0030199 collagen fibril organization;GO:0030574 collagen catabolic process;GO:0030324 lung development		Enzymes/ENZYME proteins/Hydrolases	Plasma membrane;Vesicles(Approved)		(M3468)NABA ECM REGULATORS; (M5885)NABA MATRISOME ASSOCIATED; (M5889)NABA MATRISOME		1.0	0.0	1.0	0.0	1.0	0.0	0.0	0.0	0.0	0.0	1.0	0.0	0.0	0.0	1.0	0.0	0.0	0.0	0.0	0.0
ADAMTS3	9508	symbol	H. sapiens	9508	H. sapiens	ADAMTS3	ADAM metallopeptidase with thrombospondin type 1 motif 3	GO:1900748 positive regulation of vascular endothelial growth factor signaling pathway;GO:1900746 regulation of vascular endothelial growth factor signaling pathway;GO:1902547 regulation of cellular response to vascular endothelial growth factor stimulus			Intermediate filaments(Approved)		(M3468)NABA ECM REGULATORS; (M5885)NABA MATRISOME ASSOCIATED; (M5889)NABA MATRISOME		1.0	0.0	1.0	0.0	1.0	0.0	0.0	1.0	0.0	0.0	1.0	0.0	0.0	0.0	1.0	0.0	0.0	0.0	1.0	0.0
ADAMTS4	9507	symbol	H. sapiens	9507	H. sapiens	ADAMTS4	ADAM metallopeptidase with thrombospondin type 1 motif 4	GO:0022617 extracellular matrix disassembly;GO:0030198 extracellular matrix organization;GO:0043062 extracellular structure organization		Enzymes/ENZYME proteins/Hydrolases	Nuclear speckles(Approved)		(M3468)NABA ECM REGULATORS; (M5885)NABA MATRISOME ASSOCIATED; (M5889)NABA MATRISOME		1.0	0.0	1.0	0.0	1.0	0.0	0.0	0.0	1.0	0.0	0.0	0.0	0.0	0.0	0.0	0.0	0.0	0.0	0.0	0.0
ADAMTS5	11096	symbol	H. sapiens	11096	H. sapiens	ADAMTS5	ADAM metallopeptidase with thrombospondin type 1 motif 5	GO:0044691 tooth eruption;GO:0120163 negative regulation of cold-induced thermogenesis;GO:0022617 extracellular matrix disassembly			Nucleoplasm(Supported)	Batimastat (Zinc ion binding);(2R)-N~4~-hydroxy-2-(3-hydroxybenzyl)-N~1~-[(1S,2R)-2-hydroxy-2,3-dihydro-1H-inden-1-yl]butanediamide (Zinc ion binding);N-hydroxy-4-({4-[4-(trifluoromethyl)phenoxy]phenyl}sulfonyl)tetrahydro-2H-pyran-4-carboxamide (Zinc ion binding)	(M3468)NABA ECM REGULATORS; (M5885)NABA MATRISOME ASSOCIATED; (M5889)NABA MATRISOME	(M5915)HALLMARK APICAL JUNCTION	1.0	0.0	1.0	0.0	1.0	0.0	0.0	0.0	0.0	0.0	0.0	0.0	0.0	0.0	0.0	0.0	0.0	0.0	0.0	0.0
ADAMTS6	11174	symbol	H. sapiens	11174	H. sapiens	ADAMTS6	ADAM metallopeptidase with thrombospondin type 1 motif 6	GO:0035904 aorta development;GO:0060976 coronary vasculature development;GO:0060840 artery development					(M3468)NABA ECM REGULATORS; (M5885)NABA MATRISOME ASSOCIATED; (M5889)NABA MATRISOME		0.0	1.0	0.0	0.0	1.0	0.0	0.0	0.0	0.0	0.0	0.0	0.0	0.0	0.0	0.0	0.0	1.0	0.0	0.0	0.0
ADAMTS7	11173	symbol	H. sapiens	11173	H. sapiens	ADAMTS7	ADAM metallopeptidase with thrombospondin type 1 motif 7	GO:0032331 negative regulation of chondrocyte differentiation;GO:0061037 negative regulation of cartilage development;GO:0032330 regulation of chondrocyte differentiation			Vesicles(Supported)		(M3468)NABA ECM REGULATORS; (M5885)NABA MATRISOME ASSOCIATED; (M5889)NABA MATRISOME		0.0	0.0	0.0	0.0	1.0	0.0	0.0	1.0	1.0	0.0	0.0	0.0	0.0	0.0	0.0	0.0	0.0	0.0	1.0	0.0
ADAMTSL2	9719	symbol	H. sapiens	9719	H. sapiens	ADAMTSL2	ADAMTS like 2	GO:0060481 lobar bronchus epithelium development;GO:0060482 lobar bronchus development;GO:0030512 negative regulation of transforming growth factor beta receptor signaling pathway			Vesicles(Approved)		(M3468)NABA ECM REGULATORS; (M5885)NABA MATRISOME ASSOCIATED; (M5889)NABA MATRISOME		1.0	0.0	0.0	0.0	1.0	0.0	0.0	1.0	0.0	0.0	0.0	0.0	0.0	0.0	0.0	0.0	0.0	0.0	1.0	0.0
ADC	113451	gene_synonym	H. sapiens	113451	H. sapiens	AZIN2	antizyme inhibitor 2	GO:0033387 putrescine biosynthetic process from ornithine;GO:1902269 positive regulation of polyamine transmembrane transport;GO:0097055 agmatine biosynthetic process				Pyridoxal Phosphate (Putrescine transmembrane transporter activity);L-Arginine (Putrescine transmembrane transporter activity)			0.0	0.0	0.0	0.0	0.0	0.0	0.0	0.0	0.0	0.0	0.0	0.0	0.0	0.0	0.0	0.0	0.0	0.0	0.0	0.0
ADORA1	134	symbol	H. sapiens	134	H. sapiens	ADORA1	adenosine A1 receptor	GO:0042323 negative regulation of circadian sleep/wake cycle, non-REM sleep;GO:1900453 negative regulation of long-term synaptic depression;GO:0042321 negative regulation of circadian sleep/wake cycle, sleep		G-protein coupled receptors/{Adenosine and adenine nucleotide receptors,GPCRs excl olfactory receptors};Transporters	Plasma membrane(Supported)	Caffeine (Purine nucleoside binding);Theophylline (Purine nucleoside binding);Adenosine (Purine nucleoside binding);Dyphylline (Purine nucleoside binding);Pentoxifylline (Purine nucleoside binding);Enprofylline (Purine nucleoside binding);Gabapentin (Purine nucleoside binding);Aminophylline (Purine nucleoside binding);Oxtriphylline (Purine nucleoside binding);Theobromine (Purine nucleoside bindin…			0.0	0.0	0.0	1.0	0.0	0.0	0.0	1.0	0.0	1.0	0.0	0.0	0.0	1.0	1.0	0.0	0.0	0.0	0.0	0.0
ADRA1B	147	symbol	H. sapiens	147	H. sapiens	ADRA1B	adrenoceptor alpha 1B	GO:0001994 norepinephrine-epinephrine vasoconstriction involved in regulation of systemic arterial blood pressure;GO:0003321 positive regulation of blood pressure by epinephrine-norepinephrine;GO:0045907 positive regulation of vasoconstriction		G-protein coupled receptors/GPCRs excl olfactory receptors	Plasma membrane(Supported)	Midodrine (Protein heterodimerization activity);Ziprasidone (Protein heterodimerization activity);Cabergoline (Protein heterodimerization activity);Dapiprazole (Protein heterodimerization activity);Amitriptyline (Protein heterodimerization activity);Olanzapine (Protein heterodimerization activity);Alfuzosin (Protein heterodimerization activity);Clozapine (Protein heterodimerization activity);Nore…	(M15)PID LYSOPHOSPHOLIPID PATHWAY	(M5915)HALLMARK APICAL JUNCTION	0.0	0.0	0.0	0.0	0.0	0.0	0.0	0.0	0.0	0.0	0.0	0.0	0.0	1.0	0.0	0.0	0.0	0.0	0.0	0.0
AEBP1	165	symbol	H. sapiens	165	H. sapiens	AEBP1	AE binding protein 1	GO:1904026 regulation of collagen fibril organization;GO:1903053 regulation of extracellular matrix organization;GO:0030199 collagen fibril organization		Enzymes/Peptidases/Metallopeptidases	Vesicles(Supported)Cytosol;Nucleoplasm(Approved)		(M3008)NABA ECM GLYCOPROTEINS; (M5884)NABA CORE MATRISOME; (M5889)NABA MATRISOME	(M5909)HALLMARK MYOGENESIS	1.0	0.0	0.0	0.0	0.0	0.0	0.0	0.0	0.0	0.0	1.0	0.0	0.0	0.0	1.0	0.0	0.0	0.0	0.0	0.0
AFAP1L1	134265	symbol	H. sapiens	134265	H. sapiens	AFAP1L1	actin filament associated protein 1 like 1								0.0	0.0	0.0	0.0	0.0	0.0	0.0	0.0	0.0	0.0	0.0	0.0	0.0	0.0	0.0	0.0	0.0	0.0	0.0	0.0
AFAP1	60312	symbol	H. sapiens	60312	H. sapiens	AFAP1	actin filament associated protein 1	GO:0051493 regulation of cytoskeleton organization;GO:0033043 regulation of organelle organization;GO:0007010 cytoskeleton organization			Actin filaments(Supported)Cytosol;Focal adhesion sites(Approved)				0.0	0.0	0.0	0.0	0.0	0.0	0.0	0.0	0.0	0.0	0.0	0.0	0.0	0.0	1.0	0.0	0.0	0.0	0.0	0.0
AG2	10551	gene_synonym	H. sapiens	10551	H. sapiens	AGR2	anterior gradient 2, protein disulphide isomerase family member	GO:1903899 positive regulation of PERK-mediated unfolded protein response;GO:1903896 positive regulation of IRE1-mediated unfolded protein response;GO:0060480 lung goblet cell differentiation			Cytosol(Approved)			(M5907)HALLMARK ESTROGEN RESPONSE LATE	0.0	0.0	0.0	0.0	0.0	0.0	1.0	1.0	0.0	1.0	0.0	0.0	0.0	0.0	0.0	0.0	0.0	0.0	0.0	0.0
AIF1	199	symbol	H. sapiens	199	H. sapiens	AIF1	allograft inflammatory factor 1	GO:0014739 positive regulation of muscle hyperplasia;GO:0071672 negative regulation of smooth muscle cell chemotaxis;GO:0071673 positive regulation of smooth muscle cell chemotaxis			Cytosol(Approved)				0.0	0.0	0.0	1.0	0.0	0.0	1.0	0.0	0.0	1.0	0.0	0.0	0.0	0.0	1.0	0.0	0.0	0.0	0.0	0.0
AJAP1	55966	symbol	H. sapiens	55966	H. sapiens	AJAP1	adherens junctions associated protein 1	GO:0030860 regulation of polarized epithelial cell differentiation;GO:0001953 negative regulation of cell-matrix adhesion;GO:0030859 polarized epithelial cell differentiation							0.0	0.0	0.0	0.0	0.0	0.0	1.0	0.0	0.0	1.0	0.0	0.0	1.0	0.0	0.0	0.0	0.0	0.0	0.0	0.0
AK5	26289	symbol	H. sapiens	26289	H. sapiens	AK5	adenylate kinase 5	GO:0006173 dADP biosynthetic process;GO:0009183 purine deoxyribonucleoside diphosphate biosynthetic process;GO:0009153 purine deoxyribonucleotide biosynthetic process		Enzymes/ENZYME proteins/Transferases	Cytosol(Supported)Microtubule organizing center(Approved)				0.0	0.0	0.0	0.0	0.0	0.0	0.0	0.0	0.0	0.0	0.0	0.0	0.0	0.0	0.0	0.0	0.0	0.0	0.0	0.0
AKAP12	9590	symbol	H. sapiens	9590	H. sapiens	AKAP12	A-kinase anchoring protein 12	GO:0061870 positive regulation of hepatic stellate cell migration;GO:1900143 positive regulation of oligodendrocyte apoptotic process;GO:0061869 regulation of hepatic stellate cell migration			Cytosol;Plasma membrane(Supported)			(M5908)HALLMARK ANDROGEN RESPONSE; (M5953)HALLMARK KRAS SIGNALING UP; (M5891)HALLMARK HYPOXIA	0.0	1.0	0.0	1.0	0.0	0.0	0.0	0.0	0.0	0.0	0.0	0.0	0.0	0.0	0.0	0.0	0.0	0.0	0.0	0.0
AKAP2	445815	gene_synonym	H. sapiens	445815	H. sapiens	PALM2-AKAP2	PALM2-AKAP2 fusion	GO:0008360 regulation of cell shape;GO:0022604 regulation of cell morphogenesis;GO:0000902 cell morphogenesis			Plasma membrane(Approved)				0.0	0.0	0.0	0.0	0.0	0.0	0.0	0.0	0.0	0.0	0.0	0.0	0.0	0.0	0.0	0.0	0.0	0.0	0.0	0.0
AKT3	10000	symbol	H. sapiens	10000	H. sapiens	AKT3	AKT serine/threonine kinase 3	GO:1905653 positive regulation of artery morphogenesis;GO:0090050 positive regulation of cell migration involved in sprouting angiogenesis;GO:1905651 regulation of artery morphogenesis	AGC Ser/Thr protein kinase family	Enzymes/{ENZYME proteins/Transferases,Kinases/AGC Ser/Thr protein kinases};RAS pathway related proteins	Cytosol(Supported)		(M18895)SA TRKA RECEPTOR; (M12771)SA PTEN PATHWAY; (M9378)ST INTERLEUKIN 4 PATHWAY	(M5957)HALLMARK PANCREAS BETA CELLS; (M5942)HALLMARK UV RESPONSE DN; (M5915)HALLMARK APICAL JUNCTION	0.0	1.0	0.0	1.0	0.0	1.0	0.0	0.0	0.0	0.0	0.0	0.0	0.0	1.0	0.0	0.0	0.0	0.0	0.0	0.0
ALDH1L2	160428	symbol	H. sapiens	160428	H. sapiens	ALDH1L2	aldehyde dehydrogenase 1 family member L2	GO:0009258 10-formyltetrahydrofolate catabolic process;GO:0009397 folic acid-containing compound catabolic process;GO:0009256 10-formyltetrahydrofolate metabolic process		Enzymes/ENZYME proteins/Oxidoreductases	Mitochondria(Enhanced)				0.0	0.0	0.0	0.0	0.0	0.0	0.0	0.0	0.0	0.0	0.0	0.0	0.0	0.0	0.0	0.0	0.0	0.0	0.0	0.0
ALOX5AP	241	symbol	H. sapiens	241	H. sapiens	ALOX5AP	arachidonate 5-lipoxygenase activating protein	GO:2001301 lipoxin biosynthetic process;GO:2001300 lipoxin metabolic process;GO:0019370 leukotriene biosynthetic process				DG031 (Protein n-terminus binding);AM103 (Protein n-terminus binding)			0.0	0.0	0.0	0.0	0.0	0.0	0.0	0.0	0.0	0.0	0.0	0.0	0.0	0.0	0.0	0.0	0.0	0.0	0.0	0.0
ALPK2	115701	symbol	H. sapiens	115701	H. sapiens	ALPK2	alpha kinase 2	GO:0006468 protein phosphorylation;GO:0016310 phosphorylation;GO:0006796 phosphate-containing compound metabolic process	Atypical: Alpha-type protein kinase family	Enzymes/Kinases/Atypical kinases	Cytosol(Approved)				0.0	0.0	0.0	0.0	0.0	0.0	0.0	0.0	0.0	0.0	0.0	0.0	0.0	0.0	0.0	0.0	0.0	0.0	0.0	0.0
AMIGO2	347902	symbol	H. sapiens	347902	H. sapiens	AMIGO2	adhesion molecule with Ig like domain 2	GO:0007157 heterophilic cell-cell adhesion via plasma membrane cell adhesion molecules;GO:0051965 positive regulation of synapse assembly;GO:0007156 homophilic cell adhesion via plasma membrane adhesion molecules			Cytosol;Golgi apparatus;Plasma membrane(Approved)			(M5915)HALLMARK APICAL JUNCTION	0.0	0.0	0.0	0.0	0.0	0.0	0.0	0.0	0.0	0.0	0.0	0.0	0.0	1.0	1.0	0.0	0.0	0.0	0.0	0.0
AMPH	273	symbol	H. sapiens	273	H. sapiens	AMPH	amphiphysin	GO:0048488 synaptic vesicle endocytosis;GO:0140238 presynaptic endocytosis;GO:0036465 synaptic vesicle recycling			Cytosol(Supported)Plasma membrane(Approved)		(M214)PID ERBB1 INTERNALIZATION PATHWAY	(M5942)HALLMARK UV RESPONSE DN	0.0	0.0	0.0	0.0	0.0	0.0	0.0	0.0	0.0	0.0	0.0	0.0	0.0	0.0	0.0	0.0	0.0	0.0	0.0	0.0
AMZ1	155185	symbol	H. sapiens	155185	H. sapiens	AMZ1	archaelysin family metallopeptidase 1	GO:0006508 proteolysis;GO:0019538 protein metabolic process;GO:1901564 organonitrogen compound metabolic process		Enzymes/Peptidases/Metallopeptidases					0.0	0.0	0.0	0.0	0.0	0.0	0.0	0.0	0.0	0.0	0.0	0.0	0.0	0.0	0.0	0.0	0.0	0.0	0.0	0.0
ANGPT1	284	symbol	H. sapiens	284	H. sapiens	ANGPT1	angiopoietin 1	GO:2000446 regulation of macrophage migration inhibitory factor signaling pathway;GO:0002740 negative regulation of cytokine secretion involved in immune response;GO:0030210 heparin biosynthetic process		RAS pathway related proteins			(M92)PID ANGIOPOIETIN RECEPTOR PATHWAY; (M100)PID SHP2 PATHWAY; (M5883)NABA SECRETED FACTORS	(M5905)HALLMARK ADIPOGENESIS	0.0	1.0	0.0	1.0	1.0	1.0	1.0	1.0	0.0	0.0	0.0	0.0	0.0	0.0	0.0	0.0	0.0	0.0	0.0	1.0
ANGPT2	285	symbol	H. sapiens	285	H. sapiens	ANGPT2	angiopoietin 2	GO:0050928 negative regulation of positive chemotaxis;GO:0043537 negative regulation of blood vessel endothelial cell migration;GO:0048014 Tie signaling pathway		RAS pathway related proteins			(M92)PID ANGIOPOIETIN RECEPTOR PATHWAY; (M5883)NABA SECRETED FACTORS; (M5885)NABA MATRISOME ASSOCIATED		0.0	1.0	0.0	1.0	1.0	1.0	1.0	1.0	0.0	0.0	0.0	0.0	0.0	0.0	0.0	0.0	0.0	0.0	0.0	0.0
ANGPTL2	23452	symbol	H. sapiens	23452	H. sapiens	ANGPTL2	angiopoietin like 2	GO:0007275 multicellular organism development;GO:0048856 anatomical structure development;GO:0032502 developmental process			Golgi apparatus(Approved)		(M16801)SIG REGULATION OF THE ACTIN CYTOSKELETON BY RHO GTPASES; (M5193)SIG CHEMOTAXIS; (M3270)ST INTEGRIN SIGNALING PATHWAY		0.0	0.0	0.0	0.0	1.0	0.0	0.0	0.0	0.0	0.0	0.0	0.0	0.0	0.0	0.0	0.0	0.0	0.0	0.0	0.0
ANO6	196527	symbol	H. sapiens	196527	H. sapiens	ANO6	anoctamin 6	GO:1903766 positive regulation of potassium ion export across plasma membrane;GO:1902304 positive regulation of potassium ion export;GO:0097045 phosphatidylserine exposure on blood platelet		Transporters/Transporter channels and pores	Plasma membrane(Supported)Cytosol(Uncertain)				0.0	0.0	0.0	1.0	0.0	0.0	0.0	0.0	1.0	1.0	0.0	1.0	0.0	1.0	0.0	0.0	0.0	0.0	0.0	0.0
ANTXR1	84168	symbol	H. sapiens	84168	H. sapiens	ANTXR1	ANTXR cell adhesion molecule 1	GO:1901202 negative regulation of extracellular matrix assembly;GO:1905050 positive regulation of metallopeptidase activity;GO:1901201 regulation of extracellular matrix assembly			Vesicles(Uncertain)		(M267)PID ANTHRAX PATHWAY		1.0	1.0	0.0	0.0	0.0	0.0	1.0	0.0	0.0	0.0	0.0	0.0	0.0	1.0	1.0	0.0	0.0	0.0	0.0	0.0
ANXA5	308	symbol	H. sapiens	308	H. sapiens	ANXA5	annexin A5	GO:1902721 negative regulation of prolactin secretion;GO:0097211 cellular response to gonadotropin-releasing hormone;GO:0070459 prolactin secretion		Transporters/Transporter channels and pores	Nuclear membrane(Approved)	L-Alpha-Glycerophosphorylserine (Phospholipid binding);L-thioproline (Phospholipid binding);K201 (Phospholipid binding);L-Alpha-Glycerophosphorylethanolamine (Phospholipid binding);1,4-Dideoxy-O2-Sulfo-Glucuronic Acid (Phospholipid binding);N,O6-Disulfo-Glucosamine (Phospholipid binding);1,4-Dideoxy-5-Dehydro-O2-Sulfo-Glucuronic Acid (Phospholipid binding)	(M5880)NABA ECM AFFILIATED; (M5885)NABA MATRISOME ASSOCIATED; (M5889)NABA MATRISOME	(M5892)HALLMARK CHOLESTEROL HOMEOSTASIS; (M5921)HALLMARK COMPLEMENT	0.0	0.0	0.0	0.0	1.0	0.0	0.0	0.0	0.0	1.0	0.0	0.0	0.0	0.0	0.0	0.0	0.0	0.0	0.0	0.0
ANXA6	309	symbol	H. sapiens	309	H. sapiens	ANXA6	annexin A6	GO:0003418 growth plate cartilage chondrocyte differentiation;GO:0003413 chondrocyte differentiation involved in endochondral bone morphogenesis;GO:0003417 growth plate cartilage development		Transporters/Transporter channels and pores			(M5880)NABA ECM AFFILIATED; (M5885)NABA MATRISOME ASSOCIATED; (M5889)NABA MATRISOME		0.0	1.0	0.0	0.0	1.0	0.0	0.0	0.0	1.0	1.0	0.0	0.0	0.0	0.0	0.0	0.0	0.0	1.0	0.0	0.0
APBA2	321	symbol	H. sapiens	321	H. sapiens	APBA2	amyloid beta precursor protein binding family A member 2	GO:2000300 regulation of synaptic vesicle exocytosis;GO:1902803 regulation of synaptic vesicle transport;GO:0016079 synaptic vesicle exocytosis							0.0	0.0	0.0	0.0	0.0	0.0	0.0	0.0	0.0	0.0	0.0	0.0	0.0	0.0	0.0	0.0	0.0	0.0	0.0	1.0
APBB2	323	symbol	H. sapiens	323	H. sapiens	APBB2	amyloid beta precursor protein binding family B member 2	GO:0007411 axon guidance;GO:0097485 neuron projection guidance;GO:0007409 axonogenesis			Mitochondria(Approved)			(M5942)HALLMARK UV RESPONSE DN	1.0	0.0	0.0	1.0	0.0	0.0	0.0	0.0	0.0	0.0	0.0	0.0	0.0	1.0	0.0	0.0	0.0	0.0	0.0	0.0
APCDD1L	164284	symbol	H. sapiens	164284	H. sapiens	APCDD1L	APC down-regulated 1 like				Mitochondria(Uncertain)				0.0	0.0	0.0	0.0	0.0	0.0	0.0	0.0	0.0	0.0	0.0	0.0	0.0	0.0	0.0	0.0	0.0	0.0	0.0	0.0
APLN	8862	symbol	H. sapiens	8862	H. sapiens	APLN	apelin	GO:1904022 positive regulation of G protein-coupled receptor internalization;GO:0051466 positive regulation of corticotropin-releasing hormone secretion;GO:0051461 positive regulation of corticotropin secretion							0.0	1.0	0.0	0.0	0.0	0.0	0.0	1.0	0.0	1.0	0.0	0.0	0.0	1.0	0.0	0.0	1.0	0.0	1.0	1.0
APOB48R	55911	gene_synonym	H. sapiens	55911	H. sapiens	APOBR	apolipoprotein B receptor	GO:0034447 very-low-density lipoprotein particle clearance;GO:0034381 plasma lipoprotein particle clearance;GO:0006641 triglyceride metabolic process							0.0	0.0	0.0	0.0	0.0	0.0	0.0	0.0	0.0	0.0	0.0	0.0	0.0	0.0	0.0	0.0	0.0	0.0	0.0	0.0
APOE	348	symbol	H. sapiens	348	H. sapiens	APOE	apolipoprotein E	GO:1903002 positive regulation of lipid transport across blood brain barrier;GO:1902995 positive regulation of phospholipid efflux;GO:1905890 regulation of cellular response to very-low-density lipoprotein particle stimulus			Vesicles(Approved)	Human Serum Albumin (Very-low-density lipoprotein particle receptor binding);Serum albumin iodonated (Very-low-density lipoprotein particle receptor binding)		(M5905)HALLMARK ADIPOGENESIS; (M5934)HALLMARK XENOBIOTIC METABOLISM	1.0	1.0	0.0	0.0	0.0	0.0	0.0	0.0	0.0	1.0	0.0	0.0	0.0	1.0	1.0	0.0	0.0	0.0	0.0	0.0
APP	351	symbol	H. sapiens	351	H. sapiens	APP	amyloid beta precursor protein	GO:0061890 positive regulation of astrocyte activation;GO:0051563 smooth endoplasmic reticulum calcium ion homeostasis;GO:0045821 positive regulation of glycolytic process		Transporters/Transporter channels and pores	Golgi apparatus;Vesicles(Approved)	L-methionine (R)-S-oxide (Transition metal ion binding);CAD106 (Transition metal ion binding);Mito-4509 (Transition metal ion binding);Florbetaben (18F) (Transition metal ion binding);Florbetapir (18F) (Transition metal ion binding);Flutemetamol (18F) (Transition metal ion binding)	(M33)PID GLYPICAN 1PATHWAY; (M220)PID CASPASE PATHWAY; (M153)PID P75 NTR PATHWAY	(M5944)HALLMARK ANGIOGENESIS; (M5916)HALLMARK APICAL SURFACE; (M5902)HALLMARK APOPTOSIS	1.0	0.0	0.0	1.0	0.0	1.0	0.0	1.0	0.0	0.0	0.0	0.0	0.0	1.0	1.0	0.0	0.0	0.0	0.0	0.0
AQP9	366	symbol	H. sapiens	366	H. sapiens	AQP9	aquaporin 9	GO:0015722 canalicular bile acid transport;GO:1904823 purine nucleobase transmembrane transport;GO:0071918 urea transmembrane transport						(M5948)HALLMARK BILE ACID METABOLISM; (M5932)HALLMARK INFLAMMATORY RESPONSE; (M5934)HALLMARK XENOBIOTIC METABOLISM	0.0	0.0	0.0	0.0	0.0	0.0	0.0	0.0	0.0	0.0	0.0	0.0	0.0	0.0	0.0	0.0	0.0	0.0	0.0	0.0
ARHGAP22	58504	symbol	H. sapiens	58504	H. sapiens	ARHGAP22	Rho GTPase activating protein 22	GO:0099175 regulation of postsynapse organization;GO:0001525 angiogenesis;GO:0099173 postsynapse organization			Cytosol;Nucleoplasm;Plasma membrane(Supported)				0.0	1.0	0.0	0.0	0.0	0.0	0.0	0.0	0.0	0.0	0.0	0.0	0.0	0.0	0.0	0.0	0.0	0.0	0.0	0.0
ARHGAP31	57514	symbol	H. sapiens	57514	H. sapiens	ARHGAP31	Rho GTPase activating protein 31	GO:0043547 positive regulation of GTPase activity;GO:0051056 regulation of small GTPase mediated signal transduction;GO:0043087 regulation of GTPase activity							0.0	0.0	0.0	0.0	0.0	0.0	0.0	0.0	0.0	0.0	0.0	0.0	0.0	0.0	0.0	0.0	0.0	0.0	0.0	0.0
ARHGEF10	9639	symbol	H. sapiens	9639	H. sapiens	ARHGEF10	Rho guanine nucleotide exchange factor 10	GO:0051496 positive regulation of stress fiber assembly;GO:0022011 myelination in peripheral nervous system;GO:0051492 regulation of stress fiber assembly			Nucleoplasm(Approved)		(M68)PID RHOA REG PATHWAY		0.0	0.0	0.0	0.0	0.0	0.0	0.0	0.0	0.0	0.0	0.0	0.0	0.0	0.0	1.0	0.0	0.0	0.0	0.0	0.0
ARHGEF17	9828	symbol	H. sapiens	9828	H. sapiens	ARHGEF17	Rho guanine nucleotide exchange factor 17	GO:0035023 regulation of Rho protein signal transduction;GO:0007266 Rho protein signal transduction;GO:0046578 regulation of Ras protein signal transduction			Cytosol(Approved)		(M68)PID RHOA REG PATHWAY		0.0	0.0	0.0	0.0	0.0	0.0	0.0	0.0	0.0	0.0	0.0	0.0	0.0	0.0	1.0	0.0	0.0	0.0	0.0	0.0
ARHGEF6	9459	symbol	H. sapiens	9459	H. sapiens	ARHGEF6	Rac/Cdc42 guanine nucleotide exchange factor 6	GO:0030032 lamellipodium assembly;GO:0007254 JNK cascade;GO:0035023 regulation of Rho protein signal transduction			Cytosol(Approved)		(M83)PID CDC42 REG PATHWAY; (M241)PID RAC1 REG PATHWAY; (M71)PID ILK PATHWAY	(M5915)HALLMARK APICAL JUNCTION	0.0	0.0	0.0	0.0	0.0	0.0	0.0	0.0	0.0	0.0	0.0	0.0	0.0	0.0	0.0	0.0	0.0	0.0	0.0	0.0
ARID5A	10865	symbol	H. sapiens	10865	H. sapiens	ARID5A	AT-rich interaction domain 5A	GO:0071391 cellular response to estrogen stimulus;GO:0043627 response to estrogen;GO:0000122 negative regulation of transcription by RNA polymerase II		Transcription factors/Helix-turn-helix domains	Nucleus(Enhanced)Nucleoli(Supported)				0.0	0.0	0.0	0.0	0.0	0.0	0.0	0.0	0.0	0.0	0.0	0.0	0.0	0.0	0.0	0.0	0.0	0.0	0.0	0.0
ARMC9	80210	symbol	H. sapiens	80210	H. sapiens	ARMC9	armadillo repeat containing 9	GO:0060271 cilium assembly;GO:0044782 cilium organization;GO:0120031 plasma membrane bounded cell projection assembly			Cytosol;Nucleoli(Approved)				0.0	0.0	0.0	0.0	0.0	0.0	0.0	0.0	0.0	0.0	0.0	0.0	0.0	0.0	0.0	0.0	0.0	0.0	0.0	0.0
ARMCX1	51309	symbol	H. sapiens	51309	H. sapiens	ARMCX1	armadillo repeat containing X-linked 1				Cytosol;Mitochondria;Nucleus(Approved)				0.0	0.0	0.0	0.0	0.0	0.0	0.0	0.0	0.0	0.0	0.0	0.0	0.0	0.0	0.0	0.0	0.0	0.0	0.0	0.0
ARSB	411	symbol	H. sapiens	411	H. sapiens	ARSB	arylsulfatase B	GO:0061580 colon epithelial cell migration;GO:0061582 intestinal epithelial cell migration;GO:0030207 chondroitin sulfate catabolic process		Enzymes/ENZYME proteins/Hydrolases	Golgi apparatus(Approved)				0.0	1.0	0.0	0.0	0.0	0.0	0.0	0.0	0.0	0.0	0.0	0.0	0.0	1.0	0.0	0.0	0.0	0.0	0.0	0.0
ARSI	340075	symbol	H. sapiens	340075	H. sapiens	ARSI	arylsulfatase family member I				Golgi apparatus(Approved)				0.0	0.0	0.0	0.0	0.0	0.0	0.0	0.0	0.0	0.0	0.0	0.0	0.0	0.0	0.0	0.0	0.0	0.0	0.0	0.0
ASAM	79827	gene_synonym	H. sapiens	79827	H. sapiens	CLMP	CXADR like membrane protein	GO:0048565 digestive tract development;GO:0055123 digestive system development;GO:0035295 tube development							0.0	0.0	0.0	0.0	0.0	0.0	0.0	0.0	0.0	0.0	0.0	0.0	0.0	0.0	0.0	0.0	0.0	0.0	0.0	0.0
ASAP1	50807	symbol	H. sapiens	50807	H. sapiens	ASAP1	ArfGAP with SH3 domain, ankyrin repeat and PH domain 1	GO:0061000 negative regulation of dendritic spine development;GO:1903527 positive regulation of membrane tubulation;GO:1903525 regulation of membrane tubulation			Centrosome;Cytosol;Plasma membrane(Approved)		(M243)PID ARF 3PATHWAY; (M281)PID FAK PATHWAY; (M3270)ST INTEGRIN SIGNALING PATHWAY		0.0	0.0	0.0	0.0	0.0	0.0	0.0	0.0	0.0	0.0	0.0	0.0	0.0	1.0	1.0	0.0	0.0	0.0	0.0	0.0
ASPN	54829	symbol	H. sapiens	54829	H. sapiens	ASPN	asporin	GO:0070171 negative regulation of tooth mineralization;GO:0042483 negative regulation of odontogenesis;GO:0070170 regulation of tooth mineralization			Nucleoplasm(Uncertain)		(M5882)NABA PROTEOGLYCANS; (M5884)NABA CORE MATRISOME; (M5889)NABA MATRISOME		1.0	0.0	0.0	0.0	0.0	1.0	0.0	1.0	0.0	0.0	0.0	1.0	0.0	0.0	0.0	0.0	0.0	0.0	1.0	0.0
ATP10A	57194	symbol	H. sapiens	57194	H. sapiens	ATP10A	ATPase phospholipid transporting 10A (putative)	GO:0045332 phospholipid translocation;GO:0034204 lipid translocation;GO:0015914 phospholipid transport		Enzymes/ENZYME proteins/Hydrolases					0.0	0.0	0.0	0.0	0.0	0.0	0.0	0.0	0.0	0.0	0.0	0.0	0.0	0.0	0.0	0.0	0.0	0.0	0.0	0.0
ATP6V0D2	245972	symbol	H. sapiens	245972	H. sapiens	ATP6V0D2	ATPase H+ transporting V0 subunit d2	GO:0090383 phagosome acidification;GO:0007035 vacuolar acidification;GO:0033572 transferrin transport			Vesicles(Approved)				0.0	0.0	0.0	0.0	0.0	1.0	0.0	1.0	0.0	0.0	0.0	0.0	0.0	0.0	0.0	0.0	0.0	0.0	0.0	0.0
ATP8A2	51761	symbol	H. sapiens	51761	H. sapiens	ATP8A2	ATPase phospholipid transporting 8A2	GO:0061092 positive regulation of phospholipid translocation;GO:0003011 involuntary skeletal muscle contraction;GO:0061091 regulation of phospholipid translocation		Enzymes/ENZYME proteins/Hydrolases	Plasma membrane(Supported)Nucleoplasm(Uncertain)				0.0	0.0	0.0	0.0	0.0	0.0	0.0	0.0	0.0	0.0	0.0	0.0	0.0	1.0	0.0	0.0	0.0	0.0	0.0	1.0
ATP8B2	57198	symbol	H. sapiens	57198	H. sapiens	ATP8B2	ATPase phospholipid transporting 8B2	GO:0045332 phospholipid translocation;GO:0034204 lipid translocation;GO:0015914 phospholipid transport		Enzymes/ENZYME proteins/Hydrolases					0.0	0.0	0.0	0.0	0.0	0.0	0.0	0.0	0.0	0.0	0.0	0.0	0.0	0.0	0.0	0.0	0.0	0.0	0.0	0.0
AVPR1A	552	symbol	H. sapiens	552	H. sapiens	AVPR1A	arginine vasopressin receptor 1A	GO:0032849 positive regulation of cellular pH reduction;GO:0031394 positive regulation of prostaglandin biosynthetic process;GO:0032847 regulation of cellular pH reduction		G-protein coupled receptors/GPCRs excl olfactory receptors		Desmopressin (Vasopressin receptor activity);Vasopressin (Vasopressin receptor activity);Felypressin (Vasopressin receptor activity);Conivaptan (Vasopressin receptor activity);Terlipressin (Vasopressin receptor activity);PH-284 (Vasopressin receptor activity);Tolvaptan (Vasopressin receptor activity)		(M5892)HALLMARK CHOLESTEROL HOMEOSTASIS; (M5902)HALLMARK APOPTOSIS	0.0	0.0	0.0	0.0	0.0	0.0	0.0	0.0	0.0	0.0	0.0	0.0	0.0	1.0	0.0	0.0	1.0	0.0	0.0	0.0
AXL	558	symbol	H. sapiens	558	H. sapiens	AXL	AXL receptor tyrosine kinase	GO:0032825 positive regulation of natural killer cell differentiation;GO:2000669 negative regulation of dendritic cell apoptotic process;GO:0048549 positive regulation of pinocytosis	Tyr protein kinase family	Enzymes/{ENZYME proteins/Transferases,Kinases/Tyr protein kinases}			(M236)PID DELTA NP63 PATHWAY	(M5932)HALLMARK INFLAMMATORY RESPONSE	0.0	0.0	0.0	0.0	0.0	1.0	1.0	1.0	0.0	1.0	0.0	0.0	0.0	1.0	0.0	0.0	0.0	0.0	0.0	0.0
B3GNT9	84752	symbol	H. sapiens	84752	H. sapiens	B3GNT9	UDP-GlcNAc:betaGal beta-1,3-N-acetylglucosaminyltransferase 9	GO:0030311 poly-N-acetyllactosamine biosynthetic process;GO:0030309 poly-N-acetyllactosamine metabolic process;GO:0033692 cellular polysaccharide biosynthetic process			Golgi apparatus(Supported)Nucleoli fibrillar center(Approved)				0.0	0.0	0.0	0.0	0.0	0.0	0.0	0.0	0.0	0.0	0.0	0.0	0.0	0.0	0.0	0.0	0.0	0.0	0.0	0.0
BACE1	23621	symbol	H. sapiens	23621	H. sapiens	BACE1	beta-secretase 1	GO:0050966 detection of mechanical stimulus involved in sensory perception of pain;GO:0060134 prepulse inhibition;GO:0071287 cellular response to manganese ion		Enzymes/{ENZYME proteins/Hydrolases,Peptidases/Aspartic-type peptidases};Transporters/Accessory Factors Involved in Transport	Plasma membrane(Supported)	MMI-175 (Peptidase activity);CTS-21166 (Peptidase activity);N-[amino(imino)methyl]-2-(2,5-diphenyl-1H-pyrrol-1-yl)acetamide (Peptidase activity);N-[(5R,14R)-5-AMINO-5,14-DIMETHYL-4-OXO-3-OXA-18-AZATRICYCLO[15.3.1.1~7,11~]DOCOSA-1(21),7(22),8,10,17,19-HEXAEN-19-YL]-N-METHYLMETHANESULFONAMIDE (Peptidase activity);N-[amino(imino)methyl]-2-[2-(2-chlorophenyl)-4-(4-propoxyphenyl)-3-thienyl]acetamide (…			0.0	0.0	0.0	0.0	0.0	0.0	0.0	0.0	0.0	0.0	0.0	0.0	0.0	0.0	0.0	0.0	0.0	0.0	0.0	0.0
BASP1	10409	symbol	H. sapiens	10409	H. sapiens	BASP1	brain abundant membrane attached signal protein 1	GO:2001076 positive regulation of metanephric ureteric bud development;GO:2001074 regulation of metanephric ureteric bud development;GO:0007356 thorax and anterior abdomen determination		Transporters/Transporter channels and pores	Plasma membrane(Supported)			(M5930)HALLMARK EPITHELIAL MESENCHYMAL TRANSITION	0.0	0.0	0.0	0.0	0.0	0.0	0.0	0.0	0.0	0.0	0.0	0.0	0.0	0.0	0.0	0.0	1.0	1.0	0.0	0.0
BATF3	55509	symbol	H. sapiens	55509	H. sapiens	BATF3	basic leucine zipper ATF-like transcription factor 3	GO:0043011 myeloid dendritic cell differentiation;GO:0097028 dendritic cell differentiation;GO:0001773 myeloid dendritic cell activation		Transcription factors/Basic domains			(M235)PID TCR CALCIUM PATHWAY; (M60)PID NFAT TFPATHWAY	(M5947)HALLMARK IL2 STAT5 SIGNALING	0.0	0.0	0.0	0.0	0.0	0.0	0.0	0.0	0.0	0.0	0.0	0.0	0.0	0.0	0.0	0.0	0.0	0.0	0.0	0.0
BCAT1	586	symbol	H. sapiens	586	H. sapiens	BCAT1	branched chain amino acid transaminase 1	GO:0009099 valine biosynthetic process;GO:0009098 leucine biosynthetic process;GO:0009082 branched-chain amino acid biosynthetic process		Enzymes/ENZYME proteins/Transferases		Pyridoxal Phosphate (L-valine transaminase activity);L-Glutamic Acid (L-valine transaminase activity);L-Leucine (L-valine transaminase activity);L-Valine (L-valine transaminase activity);L-Isoleucine (L-valine transaminase activity);N'-(5-CHLOROBENZOFURAN-2-CARBONYL)-2-(TRIFLUOROMETHYL)BENZENESULFONOHYDRAZIDE (L-valine transaminase activity)	(M66)PID MYC ACTIV PATHWAY	(M5950)HALLMARK ALLOGRAFT REJECTION; (M5924)HALLMARK MTORC1 SIGNALING; (M5934)HALLMARK XENOBIOTIC METABOLISM	0.0	0.0	0.0	0.0	0.0	0.0	0.0	0.0	0.0	0.0	0.0	0.0	0.0	0.0	0.0	0.0	0.0	0.0	0.0	0.0
BCL2A1	597	symbol	H. sapiens	597	H. sapiens	BCL2A1	BCL2 related protein A1	GO:0021987 cerebral cortex development;GO:2001243 negative regulation of intrinsic apoptotic signaling pathway;GO:0097192 extrinsic apoptotic signaling pathway in absence of ligand					(M10)PID BCR 5PATHWAY; (M145)PID P53 DOWNSTREAM PATHWAY	(M5890)HALLMARK TNFA SIGNALING VIA NFKB	0.0	0.0	0.0	0.0	0.0	0.0	0.0	0.0	0.0	0.0	0.0	0.0	0.0	0.0	0.0	0.0	0.0	0.0	0.0	0.0
BCL6B	255877	symbol	H. sapiens	255877	H. sapiens	BCL6B	BCL6B transcription repressor	GO:0000122 negative regulation of transcription by RNA polymerase II;GO:0045892 negative regulation of transcription, DNA-templated;GO:1903507 negative regulation of nucleic acid-templated transcription		Transcription factors/Zinc-coordinating DNA-binding domains	Vesicles(Approved)				0.0	0.0	0.0	0.0	0.0	0.0	0.0	0.0	0.0	0.0	0.0	0.0	0.0	0.0	0.0	0.0	0.0	0.0	0.0	0.0
BEND6	221336	symbol	H. sapiens	221336	H. sapiens	BEND6	BEN domain containing 6	GO:0045746 negative regulation of Notch signaling pathway;GO:0008593 regulation of Notch signaling pathway;GO:0045666 positive regulation of neuron differentiation			Nucleus;Plasma membrane(Approved)				0.0	0.0	0.0	0.0	0.0	0.0	0.0	0.0	0.0	0.0	0.0	0.0	0.0	1.0	0.0	0.0	0.0	0.0	0.0	0.0
BGN	633	symbol	H. sapiens	633	H. sapiens	BGN	biglycan	GO:0030208 dermatan sulfate biosynthetic process;GO:0030207 chondroitin sulfate catabolic process;GO:0019800 peptide cross-linking via chondroitin 4-sulfate glycosaminoglycan			Endoplasmic reticulum;Golgi apparatus(Approved)		(M264)PID TOLL ENDOGENOUS PATHWAY; (M5882)NABA PROTEOGLYCANS; (M5884)NABA CORE MATRISOME	(M5902)HALLMARK APOPTOSIS; (M5930)HALLMARK EPITHELIAL MESENCHYMAL TRANSITION; (M5891)HALLMARK HYPOXIA	1.0	0.0	0.0	0.0	0.0	1.0	0.0	0.0	0.0	0.0	0.0	0.0	0.0	0.0	0.0	0.0	0.0	0.0	0.0	0.0
BICC1	80114	symbol	H. sapiens	80114	H. sapiens	BICC1	BicC family RNA binding protein 1	GO:0090090 negative regulation of canonical Wnt signaling pathway;GO:0030178 negative regulation of Wnt signaling pathway;GO:0007368 determination of left/right symmetry			Nucleoplasm(Approved)				0.0	0.0	0.0	0.0	0.0	0.0	0.0	0.0	0.0	0.0	0.0	0.0	0.0	0.0	0.0	0.0	1.0	0.0	0.0	0.0
BMF	90427	symbol	H. sapiens	90427	H. sapiens	BMF	Bcl2 modifying factor	GO:0001844 protein insertion into mitochondrial membrane involved in apoptotic signaling pathway;GO:0097345 mitochondrial outer membrane permeabilization;GO:0032464 positive regulation of protein homooligomerization			Nucleoplasm(Approved)			(M5902)HALLMARK APOPTOSIS	0.0	0.0	0.0	0.0	0.0	0.0	0.0	0.0	0.0	0.0	0.0	0.0	0.0	0.0	1.0	0.0	0.0	0.0	0.0	0.0
BMP1	649	symbol	H. sapiens	649	H. sapiens	BMP1	bone morphogenetic protein 1	GO:0034380 high-density lipoprotein particle assembly;GO:0034377 plasma lipoprotein particle assembly;GO:0061036 positive regulation of cartilage development		Enzymes/{ENZYME proteins/Hydrolases,Peptidases/Metallopeptidases}			(M3468)NABA ECM REGULATORS; (M5885)NABA MATRISOME ASSOCIATED; (M5889)NABA MATRISOME	(M5946)HALLMARK COAGULATION; (M5930)HALLMARK EPITHELIAL MESENCHYMAL TRANSITION; (M5915)HALLMARK APICAL JUNCTION	1.0	0.0	1.0	0.0	1.0	0.0	0.0	0.0	1.0	0.0	0.0	1.0	0.0	0.0	0.0	0.0	0.0	0.0	0.0	0.0
BMP8A	353500	symbol	H. sapiens	353500	H. sapiens	BMP8A	bone morphogenetic protein 8a	GO:0046676 negative regulation of insulin secretion;GO:0002024 diet induced thermogenesis;GO:0090278 negative regulation of peptide hormone secretion					(M5883)NABA SECRETED FACTORS; (M5885)NABA MATRISOME ASSOCIATED; (M5889)NABA MATRISOME		0.0	0.0	0.0	0.0	1.0	0.0	0.0	1.0	1.0	0.0	0.0	1.0	0.0	0.0	0.0	0.0	0.0	0.0	1.0	0.0
BNC2	54796	symbol	H. sapiens	54796	H. sapiens	BNC2	basonuclin 2	GO:0003416 endochondral bone growth;GO:0043586 tongue development;GO:0098868 bone growth		Transcription factors/Zinc-coordinating DNA-binding domains	Nucleoplasm(Supported)				0.0	0.0	0.0	0.0	0.0	0.0	0.0	0.0	1.0	0.0	0.0	0.0	0.0	0.0	0.0	0.0	0.0	1.0	0.0	0.0
BTBD19	149478	symbol	H. sapiens	149478	H. sapiens	BTBD19	BTB domain containing 19								0.0	0.0	0.0	0.0	0.0	0.0	0.0	0.0	0.0	0.0	0.0	0.0	0.0	0.0	0.0	0.0	0.0	0.0	0.0	0.0
BVES	11149	symbol	H. sapiens	11149	H. sapiens	BVES	blood vessel epicardial substance	GO:0060931 sinoatrial node cell development;GO:0060921 sinoatrial node cell differentiation;GO:0060926 cardiac pacemaker cell development			Cell Junctions;Plasma membrane(Supported)				0.0	0.0	0.0	1.0	0.0	0.0	1.0	0.0	0.0	0.0	0.0	0.0	0.0	1.0	0.0	0.0	1.0	0.0	0.0	0.0
C10orf114	399726	gene_synonym	H. sapiens	399726	H. sapiens	MIR1915HG	MIR1915 host gene				Nucleoplasm(Approved)				0.0	0.0	0.0	0.0	0.0	0.0	0.0	0.0	0.0	0.0	0.0	0.0	0.0	0.0	0.0	0.0	0.0	0.0	0.0	0.0
C10orf72	196740	gene_synonym	H. sapiens	196740	H. sapiens	VSTM4	V-set and transmembrane domain containing 4				Nucleus;Vesicles(Approved)				0.0	0.0	0.0	0.0	0.0	0.0	0.0	0.0	0.0	0.0	0.0	0.0	0.0	0.0	0.0	0.0	0.0	0.0	0.0	0.0
C12orf23	90488	gene_synonym	H. sapiens	90488	H. sapiens	TMEM263	transmembrane protein 263								0.0	0.0	0.0	0.0	0.0	0.0	0.0	0.0	0.0	0.0	0.0	0.0	0.0	0.0	0.0	0.0	0.0	0.0	0.0	0.0
C13orf15	28984	gene_synonym	H. sapiens	28984	H. sapiens	RGCC	regulator of cell cycle	GO:0006977 DNA damage response, signal transduction by p53 class mediator resulting in cell cycle arrest;GO:0072431 signal transduction involved in mitotic G1 DNA damage checkpoint;GO:0003331 positive regulation of extracellular matrix constituent secretion			Nucleoli;Nucleus(Supported)		(M145)PID P53 DOWNSTREAM PATHWAY		1.0	1.0	0.0	0.0	1.0	0.0	1.0	0.0	0.0	0.0	0.0	0.0	0.0	0.0	1.0	0.0	0.0	1.0	0.0	0.0
C13orf16	121793	gene_synonym	H. sapiens	121793	H. sapiens	TEX29	testis expressed 29								0.0	0.0	0.0	0.0	0.0	0.0	0.0	0.0	0.0	0.0	0.0	0.0	0.0	0.0	0.0	0.0	0.0	0.0	0.0	0.0
C13orf18	80183	gene_synonym	H. sapiens	80183	H. sapiens	RUBCNL	rubicon like autophagy enhancer	GO:0061910 autophagosome-endosome fusion;GO:0061909 autophagosome-lysosome fusion;GO:0070873 regulation of glycogen metabolic process			Cytosol(Supported)				0.0	0.0	0.0	0.0	1.0	0.0	0.0	0.0	0.0	0.0	0.0	0.0	0.0	0.0	0.0	0.0	0.0	0.0	0.0	0.0
C13orf33	84935	gene_synonym	H. sapiens	84935	H. sapiens	MEDAG	mesenteric estrogen dependent adipogenesis	GO:0045600 positive regulation of fat cell differentiation;GO:0045598 regulation of fat cell differentiation;GO:0045444 fat cell differentiation							0.0	0.0	0.0	0.0	0.0	0.0	0.0	0.0	0.0	0.0	0.0	0.0	0.0	0.0	0.0	0.0	0.0	0.0	0.0	0.0
C14orf37	145407	gene_synonym	H. sapiens	145407	H. sapiens	ARMH4	armadillo like helical domain containing 4				Plasma membrane(Approved)				0.0	0.0	0.0	0.0	0.0	0.0	0.0	0.0	0.0	0.0	0.0	0.0	0.0	0.0	0.0	0.0	0.0	0.0	0.0	0.0
C14orf49	161176	gene_synonym	H. sapiens	161176	H. sapiens	SYNE3	spectrin repeat containing nuclear envelope family member 3	GO:0090286 cytoskeletal anchoring at nuclear membrane;GO:0007097 nuclear migration;GO:0032507 maintenance of protein location in cell			Nuclear membrane(Enhanced)				0.0	0.0	0.0	0.0	0.0	0.0	0.0	0.0	0.0	0.0	0.0	0.0	0.0	0.0	0.0	0.0	0.0	0.0	0.0	0.0
C15orf26	161502	gene_synonym	H. sapiens	161502	H. sapiens	CFAP161	cilia and flagella associated protein 161								0.0	0.0	0.0	0.0	0.0	0.0	0.0	0.0	0.0	0.0	0.0	0.0	0.0	0.0	0.0	0.0	0.0	0.0	0.0	0.0
C15orf54	400360	symbol	H. sapiens	400360	H. sapiens	C15orf54	chromosome 15 open reading frame 54 (putative)								0.0	0.0	0.0	0.0	0.0	0.0	0.0	0.0	0.0	0.0	0.0	0.0	0.0	0.0	0.0	0.0	0.0	0.0	0.0	0.0
C16orf45	89927	gene_synonym	H. sapiens	89927	H. sapiens	BMERB1	bMERB domain containing 1	GO:0021822 negative regulation of cell motility involved in cerebral cortex radial glia guided migration;GO:0021814 cell motility involved in cerebral cortex radial glia guided migration;GO:0021819 layer formation in cerebral cortex			Cytosol;Nucleoplasm(Approved)				0.0	0.0	0.0	0.0	1.0	0.0	0.0	0.0	0.0	0.0	0.0	0.0	0.0	0.0	1.0	0.0	0.0	0.0	0.0	0.0
C19orf28	126321	gene_synonym	H. sapiens	126321	H. sapiens	MFSD12	major facilitator superfamily domain containing 12	GO:0008643 carbohydrate transport;GO:0055085 transmembrane transport;GO:0071702 organic substance transport			Mitochondria;Nucleoplasm(Approved)				0.0	0.0	0.0	0.0	0.0	0.0	0.0	0.0	0.0	0.0	0.0	0.0	0.0	0.0	0.0	0.0	0.0	0.0	0.0	0.0
C19orf59	199675	gene_synonym	H. sapiens	199675	H. sapiens	MCEMP1	mast cell expressed membrane protein 1	GO:0043312 neutrophil degranulation;GO:0002283 neutrophil activation involved in immune response;GO:0042119 neutrophil activation							0.0	0.0	0.0	0.0	0.0	0.0	0.0	0.0	0.0	0.0	0.0	0.0	0.0	0.0	0.0	0.0	0.0	0.0	0.0	0.0
C1QC	714	symbol	H. sapiens	714	H. sapiens	C1QC	complement C1q C chain	GO:0045650 negative regulation of macrophage differentiation;GO:0030853 negative regulation of granulocyte differentiation;GO:0030852 regulation of granulocyte differentiation			Vesicles(Uncertain)	Cetuximab;Etanercept;Adalimumab;Abciximab;Gemtuzumab ozogamicin;Trastuzumab;Rituximab;Basiliximab;Muromonab;Ibritumomab tiuxetan;Tositumomab;Alemtuzumab;Alefacept;Efalizumab;Natalizumab;Palivizumab;Daclizumab;Bevacizumab	(M5880)NABA ECM AFFILIATED; (M5885)NABA MATRISOME ASSOCIATED; (M5889)NABA MATRISOME	(M5921)HALLMARK COMPLEMENT	0.0	0.0	0.0	0.0	1.0	0.0	0.0	0.0	0.0	0.0	0.0	0.0	0.0	0.0	0.0	0.0	0.0	0.0	0.0	0.0
C1QTNF1	114897	symbol	H. sapiens	114897	H. sapiens	C1QTNF1	C1q and TNF related 1	GO:2000860 positive regulation of aldosterone secretion;GO:2000857 positive regulation of mineralocorticoid secretion;GO:2000858 regulation of aldosterone secretion					(M5880)NABA ECM AFFILIATED; (M5885)NABA MATRISOME ASSOCIATED; (M5889)NABA MATRISOME		0.0	0.0	0.0	0.0	1.0	0.0	1.0	0.0	0.0	1.0	0.0	0.0	0.0	0.0	0.0	0.0	0.0	0.0	0.0	0.0
C1QTNF6	114904	symbol	H. sapiens	114904	H. sapiens	C1QTNF6	C1q and TNF related 6	GO:0070208 protein heterotrimerization;GO:0070206 protein trimerization;GO:0051291 protein heterooligomerization			Nucleus(Approved)		(M5880)NABA ECM AFFILIATED; (M5885)NABA MATRISOME ASSOCIATED; (M5889)NABA MATRISOME		0.0	0.0	0.0	0.0	1.0	0.0	0.0	0.0	0.0	0.0	0.0	0.0	0.0	0.0	0.0	0.0	0.0	0.0	0.0	0.0
C1R	715	symbol	H. sapiens	715	H. sapiens	C1R	complement C1r	GO:0006958 complement activation, classical pathway;GO:0030449 regulation of complement activation;GO:0002455 humoral immune response mediated by circulating immunoglobulin		Enzymes/{ENZYME proteins/Hydrolases,Peptidases/Serine-type peptidases}	Cytosol;Nucleoplasm(Uncertain)	Cetuximab (Serine-type peptidase activity);Etanercept (Serine-type peptidase activity);Adalimumab (Serine-type peptidase activity);Abciximab (Serine-type peptidase activity);Gemtuzumab ozogamicin (Serine-type peptidase activity);Trastuzumab (Serine-type peptidase activity);Rituximab (Serine-type peptidase activity);Basiliximab (Serine-type peptidase activity);Muromonab (Serine-type peptidase acti…		(M5946)HALLMARK COAGULATION; (M5921)HALLMARK COMPLEMENT; (M5913)HALLMARK INTERFERON GAMMA RESPONSE	0.0	0.0	0.0	0.0	0.0	0.0	0.0	0.0	0.0	0.0	0.0	0.0	0.0	0.0	0.0	0.0	0.0	0.0	0.0	0.0
C1S	716	symbol	H. sapiens	716	H. sapiens	C1S	complement C1s	GO:0006958 complement activation, classical pathway;GO:0030449 regulation of complement activation;GO:0002455 humoral immune response mediated by circulating immunoglobulin		Enzymes/{ENZYME proteins/Hydrolases,Peptidases/Serine-type peptidases}	Cytosol;Nucleus(Approved)	Cetuximab (Serine-type endopeptidase activity);Etanercept (Serine-type endopeptidase activity);Adalimumab (Serine-type endopeptidase activity);Abciximab (Serine-type endopeptidase activity);Gemtuzumab ozogamicin (Serine-type endopeptidase activity);Trastuzumab (Serine-type endopeptidase activity);Rituximab (Serine-type endopeptidase activity);Basiliximab (Serine-type endopeptidase activity);Murom…		(M5911)HALLMARK INTERFERON ALPHA RESPONSE; (M5946)HALLMARK COAGULATION; (M5921)HALLMARK COMPLEMENT	0.0	0.0	0.0	0.0	0.0	0.0	0.0	0.0	0.0	0.0	0.0	0.0	0.0	0.0	0.0	0.0	0.0	0.0	0.0	0.0
C1orf216	127703	symbol	H. sapiens	127703	H. sapiens	C1orf216	chromosome 1 open reading frame 216				Cytosol;Nucleoplasm(Approved)				0.0	0.0	0.0	0.0	0.0	0.0	0.0	0.0	0.0	0.0	0.0	0.0	0.0	0.0	0.0	0.0	0.0	0.0	0.0	0.0
C1orf54	79630	symbol	H. sapiens	79630	H. sapiens	C1orf54	chromosome 1 open reading frame 54				Plasma membrane(Approved)				0.0	0.0	0.0	0.0	0.0	0.0	0.0	0.0	0.0	0.0	0.0	0.0	0.0	0.0	0.0	0.0	0.0	0.0	0.0	0.0
C1orf70	339453	gene_synonym	H. sapiens	339453	H. sapiens	TMEM240	transmembrane protein 240								0.0	0.0	0.0	0.0	0.0	0.0	0.0	0.0	0.0	0.0	0.0	0.0	0.0	0.0	0.0	0.0	0.0	0.0	0.0	0.0
C20orf103	24141	gene_synonym	H. sapiens	24141	H. sapiens	LAMP5	lysosomal associated membrane protein family member 5	GO:0072594 establishment of protein localization to organelle;GO:0033365 protein localization to organelle;GO:0034613 cellular protein localization			Cytosol;Microtubule organizing center;Mitotic spindle(Approved)				0.0	0.0	0.0	0.0	0.0	0.0	0.0	0.0	0.0	0.0	0.0	0.0	0.0	0.0	0.0	0.0	0.0	0.0	0.0	0.0
C21orf7	56911	gene_synonym	H. sapiens	56911	H. sapiens	MAP3K7CL	MAP3K7 C-terminal like				Nucleoplasm(Approved)				0.0	0.0	0.0	0.0	0.0	0.0	0.0	0.0	0.0	0.0	0.0	0.0	0.0	0.0	0.0	0.0	0.0	0.0	0.0	0.0
C21orf96	80215	gene_synonym	H. sapiens	80215	H. sapiens	RUNX1-IT1	RUNX1 intronic transcript 1								0.0	0.0	0.0	0.0	0.0	0.0	0.0	0.0	0.0	0.0	0.0	0.0	0.0	0.0	0.0	0.0	0.0	0.0	0.0	0.0
C22orf26	55267	gene_synonym	H. sapiens	55267	H. sapiens	PRR34	PRR34 long non-coding RNA								0.0	0.0	0.0	0.0	0.0	0.0	0.0	0.0	0.0	0.0	0.0	0.0	0.0	0.0	0.0	0.0	0.0	0.0	0.0	0.0
C2orf27A	29798	symbol	H. sapiens	29798	H. sapiens	C2orf27A	chromosome 2 open reading frame 27A								0.0	0.0	0.0	0.0	0.0	0.0	0.0	0.0	0.0	0.0	0.0	0.0	0.0	0.0	0.0	0.0	0.0	0.0	0.0	0.0
C3AR1	719	symbol	H. sapiens	719	H. sapiens	C3AR1	complement C3a receptor 1	GO:0090023 positive regulation of neutrophil chemotaxis;GO:0010759 positive regulation of macrophage chemotaxis;GO:0071624 positive regulation of granulocyte chemotaxis		G-protein coupled receptors/{Chemokines and chemotactic factors receptors,GPCRs excl olfactory receptors}				(M5953)HALLMARK KRAS SIGNALING UP; (M5932)HALLMARK INFLAMMATORY RESPONSE	0.0	1.0	0.0	1.0	0.0	0.0	0.0	0.0	0.0	0.0	0.0	0.0	0.0	0.0	0.0	0.0	0.0	0.0	0.0	0.0
C3orf18	51161	symbol	H. sapiens	51161	H. sapiens	C3orf18	chromosome 3 open reading frame 18				Cytosol(Approved)				0.0	0.0	0.0	0.0	0.0	0.0	0.0	0.0	0.0	0.0	0.0	0.0	0.0	0.0	0.0	0.0	0.0	0.0	0.0	0.0
C3orf59	151963	gene_synonym	H. sapiens	151963	H. sapiens	MB21D2	Mab-21 domain containing 2				Cytosol(Approved)				0.0	0.0	0.0	0.0	0.0	0.0	0.0	0.0	0.0	0.0	0.0	0.0	0.0	0.0	0.0	0.0	0.0	0.0	0.0	0.0
C3orf64	285203	gene_synonym	H. sapiens	285203	H. sapiens	EOGT	EGF domain specific O-linked N-acetylglucosamine transferase	GO:0006493 protein O-linked glycosylation;GO:0006486 protein glycosylation;GO:0043413 macromolecule glycosylation		Enzymes/ENZYME proteins/Transferases	Cytosol;Nuclear membrane;Nucleoplasm(Approved)				0.0	0.0	0.0	0.0	0.0	0.0	0.0	0.0	0.0	0.0	0.0	0.0	0.0	0.0	0.0	0.0	0.0	0.0	0.0	0.0
C5AR1	728	symbol	H. sapiens	728	H. sapiens	C5AR1	complement C5a receptor 1	GO:0038178 complement component C5a signaling pathway;GO:0061888 regulation of astrocyte activation;GO:0090023 positive regulation of neutrophil chemotaxis		CD markers;G-protein coupled receptors/{Chemokines and chemotactic factors receptors,GPCRs excl olfactory receptors}				(M5932)HALLMARK INFLAMMATORY RESPONSE	0.0	1.0	0.0	1.0	0.0	0.0	0.0	0.0	0.0	0.0	0.0	0.0	0.0	0.0	0.0	0.0	0.0	0.0	0.0	0.0
C5orf13	9315	gene_synonym	H. sapiens	9315	H. sapiens	NREP	neuronal regeneration related protein	GO:0031103 axon regeneration;GO:0031102 neuron projection regeneration;GO:0017015 regulation of transforming growth factor beta receptor signaling pathway			Vesicles(Approved)				0.0	0.0	0.0	0.0	0.0	0.0	0.0	1.0	0.0	1.0	0.0	0.0	0.0	1.0	0.0	0.0	0.0	0.0	1.0	0.0
C5orf46	389336	symbol	H. sapiens	389336	H. sapiens	C5orf46	chromosome 5 open reading frame 46	GO:0008150 biological_process			Mitochondria;Nuclear speckles(Approved)				0.0	0.0	0.0	0.0	0.0	0.0	0.0	0.0	0.0	0.0	0.0	0.0	0.0	0.0	0.0	0.0	0.0	0.0	0.0	0.0
C5orf62	85027	gene_synonym	H. sapiens	85027	H. sapiens	SMIM3	small integral membrane protein 3				Vesicles(Approved)				0.0	0.0	0.0	0.0	0.0	0.0	0.0	0.0	0.0	0.0	0.0	0.0	0.0	0.0	0.0	0.0	0.0	0.0	0.0	0.0
C6orf174	387104	gene_synonym	H. sapiens	387104	H. sapiens	SOGA3	SOGA family member 3	GO:0010506 regulation of autophagy;GO:0006914 autophagy;GO:0061919 process utilizing autophagic mechanism			Cytosol;Nucleus(Approved)				0.0	0.0	0.0	0.0	0.0	0.0	0.0	0.0	0.0	0.0	0.0	0.0	0.0	0.0	0.0	0.0	0.0	0.0	0.0	0.0
C7orf10	79783	gene_synonym	H. sapiens	79783	H. sapiens	SUGCT	succinyl-CoA:glutarate-CoA transferase			Enzymes/ENZYME proteins/Transferases					0.0	0.0	0.0	0.0	0.0	0.0	0.0	0.0	0.0	0.0	0.0	0.0	0.0	0.0	0.0	0.0	0.0	0.0	0.0	0.0
C9orf109	286333	gene_synonym	H. sapiens	286333	H. sapiens	FAM225A	family with sequence similarity 225 member A								0.0	0.0	0.0	0.0	0.0	0.0	0.0	0.0	0.0	0.0	0.0	0.0	0.0	0.0	0.0	0.0	0.0	0.0	0.0	0.0
C9orf110	100128385	gene_synonym	H. sapiens	100128385	H. sapiens	FAM225B	family with sequence similarity 225 member B								0.0	0.0	0.0	0.0	0.0	0.0	0.0	0.0	0.0	0.0	0.0	0.0	0.0	0.0	0.0	0.0	0.0	0.0	0.0	0.0
C9orf21	195827	gene_synonym	H. sapiens	195827	H. sapiens	PRXL2C	peroxiredoxin like 2C	GO:0045821 positive regulation of glycolytic process;GO:2001171 positive regulation of ATP biosynthetic process;GO:0006110 regulation of glycolytic process							0.0	0.0	0.0	0.0	0.0	0.0	0.0	0.0	0.0	0.0	0.0	0.0	0.0	0.0	0.0	0.0	0.0	0.0	0.0	0.0
C9orf30	91283	gene_synonym	H. sapiens	91283	H. sapiens	MSANTD3	Myb/SANT DNA binding domain containing 3				Nucleoplasm(Approved)				0.0	0.0	0.0	0.0	0.0	0.0	0.0	0.0	0.0	0.0	0.0	0.0	0.0	0.0	0.0	0.0	0.0	0.0	0.0	0.0
CACNA1H	8912	symbol	H. sapiens	8912	H. sapiens	CACNA1H	calcium voltage-gated channel subunit alpha1 H	GO:2000344 positive regulation of acrosome reaction;GO:0032342 aldosterone biosynthetic process;GO:0034651 cortisol biosynthetic process		Transporters/Transporter channels and pores;Voltage-gated ion channels/Voltage-Gated Calcium Channels	Nucleoplasm;Vesicles(Approved)	Isradipine (Scaffold protein binding);Cinnarizine (Scaffold protein binding);Zonisamide (Scaffold protein binding);Felodipine (Scaffold protein binding);Nitrendipine (Scaffold protein binding);Nifedipine (Scaffold protein binding);Amiodarone (Scaffold protein binding);Bepridil (Scaffold protein binding);Mibefradil (Scaffold protein binding);Flunarizine (Scaffold protein binding)		(M5937)HALLMARK GLYCOLYSIS; (M5909)HALLMARK MYOGENESIS	0.0	0.0	1.0	0.0	0.0	0.0	0.0	0.0	0.0	0.0	0.0	0.0	0.0	0.0	0.0	0.0	1.0	0.0	0.0	0.0
CALD1	800	symbol	H. sapiens	800	H. sapiens	CALD1	caldesmon 1	GO:0006936 muscle contraction;GO:0003012 muscle system process;GO:0003008 system process			Actin filaments;Plasma membrane(Enhanced)			(M5930)HALLMARK EPITHELIAL MESENCHYMAL TRANSITION	0.0	0.0	0.0	0.0	0.0	0.0	0.0	0.0	0.0	0.0	0.0	0.0	0.0	0.0	0.0	0.0	0.0	0.0	0.0	0.0
CALU	813	symbol	H. sapiens	813	H. sapiens	CALU	calumenin	GO:0043687 post-translational protein modification;GO:0006464 cellular protein modification process;GO:0036211 protein modification process			Endoplasmic reticulum(Supported)			(M5930)HALLMARK EPITHELIAL MESENCHYMAL TRANSITION	0.0	0.0	0.0	0.0	0.0	0.0	0.0	0.0	0.0	0.0	0.0	0.0	0.0	0.0	0.0	0.0	0.0	0.0	0.0	0.0
CAMK1G	57172	symbol	H. sapiens	57172	H. sapiens	CAMK1G	calcium/calmodulin dependent protein kinase IG	GO:0006468 protein phosphorylation;GO:0016310 phosphorylation;GO:0006796 phosphate-containing compound metabolic process	CAMK Ser/Thr protein kinase family	Enzymes/{ENZYME proteins/Transferases,Kinases/CAMK Ser/Thr protein kinases}		5-[(E)-(5-CHLORO-2-OXO-1,2-DIHYDRO-3H-INDOL-3-YLIDENE)METHYL]-N-[2-(DIETHYLAMINO)ETHYL]-2,4-DIMETHYL-1H-PYRROLE-3-CARBOXAMIDE (Calmodulin-dependent protein kinase activity)			0.0	0.0	0.0	0.0	0.0	0.0	0.0	0.0	0.0	0.0	0.0	0.0	0.0	0.0	0.0	0.0	0.0	0.0	0.0	0.0
CAMK2A	815	symbol	H. sapiens	815	H. sapiens	CAMK2A	calcium/calmodulin dependent protein kinase II alpha	GO:0099148 regulation of synaptic vesicle docking;GO:1990443 peptidyl-threonine autophosphorylation;GO:0010666 positive regulation of cardiac muscle cell apoptotic process	CAMK Ser/Thr protein kinase family	Enzymes/{ENZYME proteins/Transferases,Kinases/CAMK Ser/Thr protein kinases}	Cell Junctions;Plasma membrane(Supported)Cytosol(Approved)	Hexatantalum Dodecabromide (Protein serine/threonine kinase activity);1,4-Dithiothreitol (Protein serine/threonine kinase activity);(2Z,3E)-2,3'-BIINDOLE-2',3(1H,1'H)-DIONE 3-{O-[(3R)-3,4-DIHYDROXYBUTYL]OXIME} (Protein serine/threonine kinase activity)	(M16518)ST WNT CA2 CYCLIC GMP PATHWAY; (M108)PID NETRIN PATHWAY; (M23)PID WNT NONCANONICAL PATHWAY		0.0	0.0	0.0	0.0	0.0	0.0	0.0	0.0	0.0	0.0	0.0	0.0	0.0	1.0	0.0	0.0	0.0	0.0	0.0	0.0
CAV1	857	symbol	H. sapiens	857	H. sapiens	CAV1	caveolin 1	GO:1903609 negative regulation of inward rectifier potassium channel activity;GO:0034141 positive regulation of toll-like receptor 3 signaling pathway;GO:0019065 receptor-mediated endocytosis of virus by host cell		Transporters/Accessory Factors Involved in Transport	Golgi apparatus(Supported)		(M90)PID WNT CANONICAL PATHWAY; (M206)PID PDGFRA PATHWAY; (M185)PID ALK1 PATHWAY	(M5942)HALLMARK UV RESPONSE DN; (M5902)HALLMARK APOPTOSIS; (M5907)HALLMARK ESTROGEN RESPONSE LATE	0.0	1.0	0.0	1.0	1.0	1.0	1.0	1.0	0.0	1.0	0.0	0.0	0.0	1.0	1.0	0.0	1.0	0.0	1.0	0.0
CBLB	868	symbol	H. sapiens	868	H. sapiens	CBLB	Cbl proto-oncogene B	GO:0007175 negative regulation of epidermal growth factor-activated receptor activity;GO:2000583 regulation of platelet-derived growth factor receptor-alpha signaling pathway;GO:0035790 platelet-derived growth factor receptor-alpha signaling pathway		Enzymes/ENZYME proteins/Transferases	Cytosol(Supported)Nucleoplasm(Approved)		(M45)PID CD40 PATHWAY; (M214)PID ERBB1 INTERNALIZATION PATHWAY; (M60)PID NFAT TFPATHWAY	(M5921)HALLMARK COMPLEMENT	0.0	0.0	0.0	0.0	0.0	0.0	0.0	1.0	0.0	0.0	0.0	0.0	0.0	0.0	0.0	0.0	0.0	0.0	0.0	0.0
CCDC102A	92922	symbol	H. sapiens	92922	H. sapiens	CCDC102A	coiled-coil domain containing 102A				Nuclear bodies;Nucleoplasm(Approved)				0.0	0.0	0.0	0.0	0.0	0.0	0.0	0.0	0.0	0.0	0.0	0.0	0.0	0.0	0.0	0.0	0.0	0.0	0.0	0.0
CCDC102B	79839	symbol	H. sapiens	79839	H. sapiens	CCDC102B	coiled-coil domain containing 102B				Cytosol;Mitochondria(Approved)				0.0	0.0	0.0	0.0	0.0	0.0	0.0	0.0	0.0	0.0	0.0	0.0	0.0	0.0	0.0	0.0	0.0	0.0	0.0	0.0
CCDC36	339834	symbol	H. sapiens	339834	H. sapiens	CCDC36	coiled-coil domain containing 36	GO:0060629 regulation of homologous chromosome segregation;GO:0060631 regulation of meiosis I;GO:0007129 synapsis			Nucleoplasm(Approved)				0.0	0.0	0.0	0.0	0.0	0.0	0.0	0.0	0.0	0.0	0.0	0.0	0.0	0.0	0.0	0.0	0.0	0.0	0.0	0.0
CCDC3	83643	symbol	H. sapiens	83643	H. sapiens	CCDC3	coiled-coil domain containing 3	GO:0010804 negative regulation of tumor necrosis factor-mediated signaling pathway;GO:0010803 regulation of tumor necrosis factor-mediated signaling pathway;GO:0001960 negative regulation of cytokine-mediated signaling pathway			Cytosol;Nucleus(Approved)				0.0	0.0	0.0	0.0	0.0	0.0	0.0	0.0	0.0	0.0	0.0	0.0	0.0	0.0	0.0	0.0	0.0	0.0	0.0	0.0
CCDC46	201134	gene_synonym	H. sapiens	201134	H. sapiens	CEP112	centrosomal protein 112	GO:0097120 receptor localization to synapse;GO:0051668 localization within membrane;GO:0031503 protein-containing complex localization			Golgi apparatus;Nucleoplasm(Approved)				0.0	0.0	0.0	0.0	0.0	0.0	0.0	0.0	0.0	0.0	0.0	0.0	0.0	0.0	0.0	0.0	0.0	0.0	0.0	0.0
CCDC80	151887	symbol	H. sapiens	151887	H. sapiens	CCDC80	coiled-coil domain containing 80	GO:0010811 positive regulation of cell-substrate adhesion;GO:0010810 regulation of cell-substrate adhesion;GO:0045785 positive regulation of cell adhesion							1.0	0.0	0.0	0.0	0.0	0.0	1.0	0.0	0.0	0.0	0.0	0.0	0.0	0.0	0.0	0.0	0.0	0.0	0.0	0.0
CCDC88A	55704	symbol	H. sapiens	55704	H. sapiens	CCDC88A	coiled-coil domain containing 88A	GO:1903566 positive regulation of protein localization to cilium;GO:0032148 activation of protein kinase B activity;GO:1903564 regulation of protein localization to cilium						(M5893)HALLMARK MITOTIC SPINDLE	0.0	0.0	0.0	0.0	0.0	0.0	0.0	0.0	0.0	0.0	0.0	0.0	0.0	1.0	1.0	0.0	0.0	0.0	0.0	0.0
CCDC89	220388	symbol	H. sapiens	220388	H. sapiens	CCDC89	coiled-coil domain containing 89				Nucleoplasm(Approved)				0.0	0.0	0.0	0.0	0.0	0.0	0.0	0.0	0.0	0.0	0.0	0.0	0.0	0.0	0.0	0.0	0.0	0.0	0.0	0.0
CCDC8	83987	symbol	H. sapiens	83987	H. sapiens	CCDC8	coiled-coil domain containing 8	GO:0010923 negative regulation of phosphatase activity;GO:0035305 negative regulation of dephosphorylation;GO:0010921 regulation of phosphatase activity			Cytosol;Nucleus;Plasma membrane(Approved)				0.0	0.0	0.0	0.0	0.0	0.0	0.0	0.0	0.0	0.0	0.0	0.0	0.0	0.0	0.0	0.0	0.0	0.0	0.0	0.0
CCIN	881	symbol	H. sapiens	881	H. sapiens	CCIN	calicin	GO:0007283 spermatogenesis;GO:0048232 male gamete generation;GO:0007276 gamete generation							0.0	0.0	0.0	0.0	0.0	0.0	0.0	0.0	0.0	0.0	0.0	0.0	0.0	0.0	0.0	0.0	0.0	0.0	0.0	0.0
CCL11	6356	symbol	H. sapiens	6356	H. sapiens	CCL11	C-C motif chemokine ligand 11	GO:0060763 mammary duct terminal end bud growth;GO:0048245 eosinophil chemotaxis;GO:0002551 mast cell chemotaxis				CAT-213 (Chemokine activity)	(M222)PID CXCR3 PATHWAY; (M28)PID IL4 2PATHWAY; (M5883)NABA SECRETED FACTORS	(M5950)HALLMARK ALLOGRAFT REJECTION	0.0	1.0	0.0	1.0	1.0	0.0	0.0	0.0	0.0	0.0	0.0	0.0	1.0	1.0	1.0	0.0	0.0	0.0	0.0	0.0
CCL13	6357	symbol	H. sapiens	6357	H. sapiens	CCL13	C-C motif chemokine ligand 13	GO:0048245 eosinophil chemotaxis;GO:0072677 eosinophil migration;GO:0030593 neutrophil chemotaxis					(M19043)ST ADRENERGIC; (M5883)NABA SECRETED FACTORS; (M5885)NABA MATRISOME ASSOCIATED	(M5950)HALLMARK ALLOGRAFT REJECTION	0.0	0.0	0.0	1.0	1.0	0.0	0.0	0.0	0.0	0.0	0.0	0.0	0.0	0.0	0.0	0.0	0.0	0.0	0.0	0.0
CCL2	6347	symbol	H. sapiens	6347	H. sapiens	CCL2	C-C motif chemokine ligand 2	GO:2000502 negative regulation of natural killer cell chemotaxis;GO:1901624 negative regulation of lymphocyte chemotaxis;GO:0035684 helper T cell extravasation			Golgi apparatus;Vesicles(Approved)	Mimosine;Danazol	(M22)PID GMCSF PATHWAY; (M65)PID FRA PATHWAY; (M196)PID IL23 PATHWAY	(M5922)HALLMARK UNFOLDED PROTEIN RESPONSE; (M5950)HALLMARK ALLOGRAFT REJECTION; (M5932)HALLMARK INFLAMMATORY RESPONSE	0.0	1.0	0.0	1.0	1.0	0.0	1.0	1.0	0.0	0.0	0.0	0.0	0.0	0.0	0.0	0.0	0.0	0.0	0.0	0.0
CCL3L1	6349	symbol	H. sapiens	6349	H. sapiens	CCL3L1	C-C motif chemokine ligand 3 like 1	GO:0030593 neutrophil chemotaxis;GO:0048247 lymphocyte chemotaxis;GO:0002548 monocyte chemotaxis							0.0	0.0	0.0	1.0	0.0	0.0	0.0	0.0	0.0	0.0	0.0	0.0	0.0	0.0	0.0	0.0	0.0	0.0	0.0	0.0
CCL3	6348	symbol	H. sapiens	6348	H. sapiens	CCL3	C-C motif chemokine ligand 3	GO:0014808 release of sequestered calcium ion into cytosol by sarcoplasmic reticulum;GO:1903514 release of sequestered calcium ion into cytosol by endoplasmic reticulum;GO:1904141 positive regulation of microglial cell migration				ROX-888 (Protein kinase activity)	(M54)PID IL12 2PATHWAY; (M5883)NABA SECRETED FACTORS; (M5885)NABA MATRISOME ASSOCIATED		0.0	0.0	0.0	1.0	1.0	0.0	0.0	0.0	0.0	0.0	0.0	1.0	0.0	1.0	0.0	0.0	0.0	0.0	0.0	0.0
CCL4L2	9560	symbol	H. sapiens	9560	H. sapiens	CCL4L2	C-C motif chemokine ligand 4 like 2						(M5883)NABA SECRETED FACTORS; (M5885)NABA MATRISOME ASSOCIATED; (M5889)NABA MATRISOME		0.0	0.0	0.0	0.0	1.0	0.0	0.0	0.0	0.0	0.0	0.0	0.0	0.0	0.0	0.0	0.0	0.0	0.0	0.0	0.0
CCL4	6351	symbol	H. sapiens	6351	H. sapiens	CCL4	C-C motif chemokine ligand 4	GO:2000503 positive regulation of natural killer cell chemotaxis;GO:0043922 negative regulation by host of viral transcription;GO:2000501 regulation of natural killer cell chemotaxis					(M54)PID IL12 2PATHWAY; (M5883)NABA SECRETED FACTORS; (M5885)NABA MATRISOME ASSOCIATED	(M5890)HALLMARK TNFA SIGNALING VIA NFKB; (M5950)HALLMARK ALLOGRAFT REJECTION	0.0	0.0	0.0	1.0	1.0	0.0	0.0	0.0	0.0	0.0	0.0	0.0	0.0	0.0	0.0	0.0	0.0	0.0	0.0	0.0
CCL7	6354	symbol	H. sapiens	6354	H. sapiens	CCL7	C-C motif chemokine ligand 7	GO:2000503 positive regulation of natural killer cell chemotaxis;GO:2000501 regulation of natural killer cell chemotaxis;GO:0140131 positive regulation of lymphocyte chemotaxis					(M5883)NABA SECRETED FACTORS; (M5885)NABA MATRISOME ASSOCIATED; (M5889)NABA MATRISOME	(M5897)HALLMARK IL6 JAK STAT3 SIGNALING; (M5950)HALLMARK ALLOGRAFT REJECTION; (M5932)HALLMARK INFLAMMATORY RESPONSE	0.0	0.0	0.0	1.0	1.0	0.0	0.0	0.0	0.0	0.0	0.0	0.0	0.0	0.0	0.0	0.0	0.0	0.0	0.0	0.0
CCL8	6355	symbol	H. sapiens	6355	H. sapiens	CCL8	C-C motif chemokine ligand 8	GO:0044828 negative regulation by host of viral genome replication;GO:0044793 negative regulation by host of viral process;GO:0044827 modulation by host of viral genome replication				Pyroglutamic Acid (Protein kinase activity)	(M5883)NABA SECRETED FACTORS; (M5885)NABA MATRISOME ASSOCIATED; (M5889)NABA MATRISOME		0.0	0.0	0.0	1.0	1.0	0.0	0.0	0.0	0.0	0.0	0.0	0.0	0.0	0.0	0.0	0.0	0.0	0.0	0.0	0.0
CCR1	1230	symbol	H. sapiens	1230	H. sapiens	CCR1	C-C motif chemokine receptor 1	GO:0090026 positive regulation of monocyte chemotaxis;GO:0045672 positive regulation of osteoclast differentiation;GO:0071677 positive regulation of mononuclear cell migration		CD markers;G-protein coupled receptors/{Chemokines and chemotactic factors receptors,GPCRs excl olfactory receptors}				(M5897)HALLMARK IL6 JAK STAT3 SIGNALING; (M5950)HALLMARK ALLOGRAFT REJECTION	0.0	0.0	0.0	1.0	0.0	0.0	0.0	0.0	0.0	1.0	0.0	1.0	0.0	0.0	0.0	0.0	0.0	0.0	0.0	0.0
CD14	929	symbol	H. sapiens	929	H. sapiens	CD14	CD14 molecule	GO:0034128 negative regulation of MyD88-independent toll-like receptor signaling pathway;GO:0038123 toll-like receptor TLR1:TLR2 signaling pathway;GO:0038124 toll-like receptor TLR6:TLR2 signaling pathway		CD markers	Vesicles(Supported)		(M264)PID TOLL ENDOGENOUS PATHWAY; (M277)PID INTEGRIN A4B1 PATHWAY; (M18)PID INTEGRIN1 PATHWAY	(M5897)HALLMARK IL6 JAK STAT3 SIGNALING; (M5902)HALLMARK APOPTOSIS; (M5932)HALLMARK INFLAMMATORY RESPONSE	0.0	0.0	0.0	0.0	0.0	1.0	0.0	0.0	0.0	0.0	0.0	0.0	0.0	0.0	0.0	0.0	0.0	0.0	0.0	0.0
CD163	9332	symbol	H. sapiens	9332	H. sapiens	CD163	CD163 molecule	GO:0006953 acute-phase response;GO:0002526 acute inflammatory response;GO:0006898 receptor-mediated endocytosis		CD markers	Plasma membrane(Approved)	WF10 (Scavenger receptor activity)			0.0	0.0	0.0	0.0	0.0	0.0	0.0	0.0	0.0	0.0	0.0	0.0	0.0	0.0	0.0	0.0	0.0	0.0	0.0	0.0
CD209	30835	symbol	H. sapiens	30835	H. sapiens	CD209	CD209 molecule	GO:0097323 B cell adhesion;GO:0046968 peptide antigen transport;GO:0002223 stimulatory C-type lectin receptor signaling pathway		CD markers			(M5880)NABA ECM AFFILIATED; (M5885)NABA MATRISOME ASSOCIATED; (M5889)NABA MATRISOME	(M5915)HALLMARK APICAL JUNCTION	0.0	0.0	0.0	0.0	1.0	0.0	1.0	0.0	0.0	0.0	0.0	0.0	0.0	0.0	0.0	0.0	0.0	0.0	0.0	0.0
CD248	57124	symbol	H. sapiens	57124	H. sapiens	CD248	CD248 molecule	GO:2000353 positive regulation of endothelial cell apoptotic process;GO:1904037 positive regulation of epithelial cell apoptotic process;GO:2000351 regulation of endothelial cell apoptotic process		CD markers	Plasma membrane(Supported)Nucleoplasm(Approved)				0.0	0.0	0.0	0.0	0.0	0.0	0.0	0.0	0.0	0.0	0.0	0.0	0.0	0.0	0.0	0.0	0.0	0.0	0.0	0.0
CD276	80381	symbol	H. sapiens	80381	H. sapiens	CD276	CD276 molecule	GO:0045078 positive regulation of interferon-gamma biosynthetic process;GO:0045072 regulation of interferon-gamma biosynthetic process;GO:0042102 positive regulation of T cell proliferation		CD markers	Vesicles(Approved)			(M5915)HALLMARK APICAL JUNCTION	0.0	0.0	0.0	0.0	0.0	0.0	1.0	0.0	0.0	0.0	0.0	0.0	0.0	0.0	0.0	0.0	0.0	0.0	0.0	0.0
CD300A	11314	symbol	H. sapiens	11314	H. sapiens	CD300A	CD300a molecule	GO:0034125 negative regulation of MyD88-dependent toll-like receptor signaling pathway;GO:1902569 negative regulation of activation of Janus kinase activity;GO:0034124 regulation of MyD88-dependent toll-like receptor signaling pathway		CD markers					0.0	0.0	0.0	1.0	0.0	0.0	1.0	0.0	0.0	0.0	0.0	0.0	0.0	0.0	0.0	0.0	0.0	0.0	0.0	0.0
CD300C	10871	symbol	H. sapiens	10871	H. sapiens	CD300C	CD300c molecule	GO:0006968 cellular defense response;GO:0050776 regulation of immune response;GO:0002682 regulation of immune system process		CD markers					0.0	0.0	0.0	0.0	0.0	0.0	0.0	0.0	0.0	0.0	0.0	0.0	0.0	0.0	0.0	0.0	0.0	0.0	0.0	0.0
CD300E	342510	symbol	H. sapiens	342510	H. sapiens	CD300E	CD300e molecule	GO:0050776 regulation of immune response;GO:0045087 innate immune response;GO:0002682 regulation of immune system process		CD markers					0.0	0.0	0.0	0.0	0.0	0.0	0.0	0.0	0.0	0.0	0.0	0.0	0.0	0.0	0.0	0.0	0.0	0.0	0.0	0.0
CD300LF	146722	symbol	H. sapiens	146722	H. sapiens	CD300LF	CD300 molecule like family member f	GO:0034125 negative regulation of MyD88-dependent toll-like receptor signaling pathway;GO:0034124 regulation of MyD88-dependent toll-like receptor signaling pathway;GO:1902216 positive regulation of interleukin-4-mediated signaling pathway		CD markers					0.0	0.0	0.0	0.0	0.0	0.0	0.0	0.0	0.0	0.0	0.0	0.0	0.0	0.0	0.0	0.0	0.0	0.0	0.0	0.0
CD80	941	symbol	H. sapiens	941	H. sapiens	CD80	CD80 molecule	GO:0045627 positive regulation of T-helper 1 cell differentiation;GO:0045625 regulation of T-helper 1 cell differentiation;GO:0045624 positive regulation of T-helper cell differentiation		CD markers		Abatacept (Virus receptor activity);Galiximab (Virus receptor activity);Belatacept (Virus receptor activity)	(M290)PID IL12 STAT4 PATHWAY; (M88)PID CD8 TCR PATHWAY; (M34)PID TCR PATHWAY	(M5956)HALLMARK KRAS SIGNALING DN; (M5890)HALLMARK TNFA SIGNALING VIA NFKB; (M5950)HALLMARK ALLOGRAFT REJECTION	0.0	0.0	0.0	0.0	0.0	0.0	1.0	0.0	0.0	0.0	0.0	0.0	0.0	0.0	0.0	0.0	0.0	0.0	0.0	0.0
CD83	9308	symbol	H. sapiens	9308	H. sapiens	CD83	CD83 molecule	GO:0043372 positive regulation of CD4-positive, alpha-beta T cell differentiation;GO:0046638 positive regulation of alpha-beta T cell differentiation;GO:0043370 regulation of CD4-positive, alpha-beta T cell differentiation		CD markers	Vesicles(Approved)			(M5947)HALLMARK IL2 STAT5 SIGNALING; (M5890)HALLMARK TNFA SIGNALING VIA NFKB	0.0	0.0	0.0	0.0	0.0	0.0	1.0	0.0	0.0	0.0	0.0	0.0	0.0	0.0	0.0	0.0	0.0	0.0	0.0	0.0
CD86	942	symbol	H. sapiens	942	H. sapiens	CD86	CD86 molecule	GO:0045630 positive regulation of T-helper 2 cell differentiation;GO:0043017 positive regulation of lymphotoxin A biosynthetic process;GO:0045628 regulation of T-helper 2 cell differentiation		CD markers		Anti-thymocyte Globulin (Rabbit) (Virus receptor activity);Abatacept (Virus receptor activity);Belatacept (Virus receptor activity)	(M290)PID IL12 STAT4 PATHWAY; (M88)PID CD8 TCR PATHWAY; (M34)PID TCR PATHWAY	(M5947)HALLMARK IL2 STAT5 SIGNALING; (M5950)HALLMARK ALLOGRAFT REJECTION; (M5915)HALLMARK APICAL JUNCTION	0.0	0.0	0.0	0.0	0.0	0.0	1.0	0.0	0.0	0.0	0.0	0.0	0.0	0.0	0.0	0.0	0.0	0.0	0.0	0.0
CD93	22918	symbol	H. sapiens	22918	H. sapiens	CD93	CD93 molecule	GO:0043312 neutrophil degranulation;GO:0002283 neutrophil activation involved in immune response;GO:0042116 macrophage activation		CD markers	Plasma membrane;Vesicles(Approved)				0.0	0.0	0.0	0.0	0.0	0.0	0.0	0.0	0.0	0.0	0.0	0.0	0.0	0.0	0.0	0.0	0.0	0.0	0.0	0.0
CDC42EP3	10602	symbol	H. sapiens	10602	H. sapiens	CDC42EP3	CDC42 effector protein 3	GO:0031274 positive regulation of pseudopodium assembly;GO:0031272 regulation of pseudopodium assembly;GO:0031269 pseudopodium assembly			Actin filaments;Plasma membrane(Supported)				0.0	0.0	0.0	0.0	0.0	0.0	0.0	0.0	0.0	0.0	0.0	0.0	0.0	1.0	1.0	0.0	0.0	0.0	0.0	0.0
CDH11	1009	symbol	H. sapiens	1009	H. sapiens	CDH11	cadherin 11	GO:0021957 corticospinal tract morphogenesis;GO:0021952 central nervous system projection neuron axonogenesis;GO:0021955 central nervous system neuron axonogenesis						(M5930)HALLMARK EPITHELIAL MESENCHYMAL TRANSITION; (M5915)HALLMARK APICAL JUNCTION	0.0	0.0	0.0	0.0	0.0	0.0	0.0	0.0	1.0	0.0	0.0	1.0	0.0	1.0	0.0	0.0	0.0	0.0	0.0	0.0
CDH13	1012	symbol	H. sapiens	1012	H. sapiens	CDH13	cadherin 13	GO:0055096 low-density lipoprotein particle mediated signaling;GO:0055095 lipoprotein particle mediated signaling;GO:0050927 positive regulation of positive chemotaxis			Plasma membrane(Supported)			(M5921)HALLMARK COMPLEMENT; (M5909)HALLMARK MYOGENESIS; (M5939)HALLMARK P53 PATHWAY	0.0	1.0	0.0	1.0	0.0	0.0	1.0	1.0	0.0	0.0	0.0	0.0	0.0	0.0	0.0	0.0	0.0	0.0	0.0	0.0
CDH2	1000	symbol	H. sapiens	1000	H. sapiens	CDH2	cadherin 2	GO:1902897 regulation of postsynaptic density protein 95 clustering;GO:2000809 positive regulation of synaptic vesicle clustering;GO:0097118 neuroligin clustering involved in postsynaptic membrane assembly		CD markers	Cell Junctions(Supported)Plasma membrane(Approved)		(M266)PID NCADHERIN PATHWAY; (M142)PID AJDISS 2PATHWAY; (M50)PID PTP1B PATHWAY	(M5930)HALLMARK EPITHELIAL MESENCHYMAL TRANSITION	0.0	1.0	0.0	0.0	0.0	0.0	0.0	0.0	0.0	0.0	0.0	0.0	0.0	1.0	0.0	0.0	1.0	0.0	0.0	0.0
CDH6	1004	symbol	H. sapiens	1004	H. sapiens	CDH6	cadherin 6	GO:0016339 calcium-dependent cell-cell adhesion via plasma membrane cell adhesion molecules;GO:0044331 cell-cell adhesion mediated by cadherin;GO:0007043 cell-cell junction assembly						(M5930)HALLMARK EPITHELIAL MESENCHYMAL TRANSITION; (M5915)HALLMARK APICAL JUNCTION	0.0	0.0	0.0	0.0	0.0	0.0	0.0	0.0	0.0	0.0	0.0	0.0	0.0	0.0	0.0	0.0	0.0	0.0	0.0	0.0
CDK14	5218	symbol	H. sapiens	5218	H. sapiens	CDK14	cyclin dependent kinase 14	GO:0060828 regulation of canonical Wnt signaling pathway;GO:0000086 G2/M transition of mitotic cell cycle;GO:0044839 cell cycle G2/M phase transition	CMGC Ser/Thr protein kinase family	Enzymes/{ENZYME proteins/Transferases,Kinases/CMGC Ser/Thr protein kinases}	Cytosol;Nucleus(Supported)				0.0	0.0	0.0	0.0	0.0	0.0	0.0	0.0	0.0	0.0	0.0	0.0	0.0	0.0	0.0	0.0	0.0	0.0	0.0	0.0
CDR1	1038	symbol	H. sapiens	1038	H. sapiens	CDR1	cerebellar degeneration related protein 1				Centrosome;Golgi apparatus;Nucleoplasm(Approved)				0.0	0.0	0.0	0.0	0.0	0.0	0.0	0.0	0.0	0.0	0.0	0.0	0.0	0.0	0.0	0.0	0.0	0.0	0.0	0.0
CDYL2	124359	symbol	H. sapiens	124359	H. sapiens	CDYL2	chromodomain Y like 2	GO:1903507 negative regulation of nucleic acid-templated transcription;GO:1902679 negative regulation of RNA biosynthetic process;GO:0051253 negative regulation of RNA metabolic process							0.0	0.0	0.0	0.0	0.0	0.0	0.0	0.0	0.0	0.0	0.0	0.0	0.0	0.0	0.0	0.0	0.0	0.0	0.0	0.0
CEBPE	1053	symbol	H. sapiens	1053	H. sapiens	CEBPE	CCAAT enhancer binding protein epsilon	GO:0030225 macrophage differentiation;GO:0030851 granulocyte differentiation;GO:0071222 cellular response to lipopolysaccharide		Transcription factors/Basic domains	Nucleoplasm(Enhanced)				0.0	0.0	0.0	0.0	0.0	0.0	0.0	0.0	0.0	0.0	0.0	0.0	0.0	0.0	0.0	0.0	0.0	0.0	0.0	0.0
CERCAM	51148	symbol	H. sapiens	51148	H. sapiens	CERCAM	cerebral endothelial cell adhesion molecule	GO:0007159 leukocyte cell-cell adhesion;GO:0098609 cell-cell adhesion;GO:0007155 cell adhesion			Cell Junctions;Nucleoli;Nucleus(Approved)			(M5915)HALLMARK APICAL JUNCTION	0.0	0.0	0.0	0.0	0.0	0.0	0.0	0.0	0.0	0.0	0.0	0.0	0.0	0.0	0.0	0.0	0.0	0.0	0.0	0.0
CETP	1071	symbol	H. sapiens	1071	H. sapiens	CETP	cholesteryl ester transfer protein	GO:0034372 very-low-density lipoprotein particle remodeling;GO:0010745 negative regulation of macrophage derived foam cell differentiation;GO:0034374 low-density lipoprotein particle remodeling		Transporters/Transporter channels and pores					1.0	0.0	0.0	0.0	0.0	0.0	0.0	0.0	0.0	0.0	0.0	0.0	0.0	0.0	0.0	0.0	0.0	0.0	0.0	0.0
CHN1	1123	symbol	H. sapiens	1123	H. sapiens	CHN1	chimerin 1	GO:0008045 motor neuron axon guidance;GO:0050770 regulation of axonogenesis;GO:0048013 ephrin receptor signaling pathway			Cytosol(Approved)		(M241)PID RAC1 REG PATHWAY		0.0	0.0	0.0	1.0	0.0	0.0	0.0	1.0	0.0	0.0	0.0	0.0	0.0	1.0	0.0	0.0	0.0	0.0	0.0	0.0
CHPF2	54480	symbol	H. sapiens	54480	H. sapiens	CHPF2	chondroitin polymerizing factor 2	GO:0030206 chondroitin sulfate biosynthetic process;GO:0030204 chondroitin sulfate metabolic process;GO:0050650 chondroitin sulfate proteoglycan biosynthetic process		Enzymes/ENZYME proteins/Transferases	Cytosol;Nucleoplasm(Approved)			(M5937)HALLMARK GLYCOLYSIS	0.0	0.0	0.0	0.0	0.0	0.0	0.0	0.0	0.0	0.0	0.0	0.0	0.0	0.0	0.0	0.0	0.0	0.0	0.0	0.0
CHPF	79586	symbol	H. sapiens	79586	H. sapiens	CHPF	chondroitin polymerizing factor	GO:0030206 chondroitin sulfate biosynthetic process;GO:0030204 chondroitin sulfate metabolic process;GO:0050650 chondroitin sulfate proteoglycan biosynthetic process		Enzymes/ENZYME proteins/Transferases	Cytosol(Supported)Centrosome;Vesicles(Approved)			(M5937)HALLMARK GLYCOLYSIS	0.0	0.0	0.0	0.0	0.0	0.0	0.0	0.0	0.0	0.0	0.0	0.0	0.0	0.0	0.0	0.0	0.0	0.0	0.0	0.0
CHRD	8646	symbol	H. sapiens	8646	H. sapiens	CHRD	chordin	GO:0021919 BMP signaling pathway involved in spinal cord dorsal/ventral patterning;GO:0021914 negative regulation of smoothened signaling pathway involved in ventral spinal cord patterning;GO:0033504 floor plate development					(M181)PID BMP PATHWAY; (M5883)NABA SECRETED FACTORS; (M5885)NABA MATRISOME ASSOCIATED		0.0	0.0	0.0	0.0	1.0	0.0	1.0	1.0	1.0	0.0	0.0	1.0	1.0	0.0	0.0	0.0	0.0	0.0	1.0	1.0
CHRNA1	1134	symbol	H. sapiens	1134	H. sapiens	CHRNA1	cholinergic receptor nicotinic alpha 1 subunit	GO:0048630 skeletal muscle tissue growth;GO:0007271 synaptic transmission, cholinergic;GO:0060079 excitatory postsynaptic potential		Transporters/Transporter channels and pores	Plasma membrane(Supported)	Galantamine (Ion channel activity);Agmatine (Ion channel activity)	(M175)PID ERBB2 ERBB3 PATHWAY	(M5909)HALLMARK MYOGENESIS	0.0	0.0	0.0	0.0	0.0	0.0	0.0	0.0	0.0	0.0	0.0	0.0	0.0	0.0	0.0	0.0	1.0	0.0	0.0	0.0
CHST11	50515	symbol	H. sapiens	50515	H. sapiens	CHST11	carbohydrate sulfotransferase 11	GO:0048703 embryonic viscerocranium morphogenesis;GO:0030206 chondroitin sulfate biosynthetic process;GO:0030512 negative regulation of transforming growth factor beta receptor signaling pathway		Enzymes/ENZYME proteins/Transferases	Golgi apparatus(Approved)				0.0	0.0	0.0	0.0	0.0	0.0	0.0	1.0	1.0	0.0	0.0	0.0	0.0	0.0	0.0	0.0	0.0	0.0	1.0	1.0
CHST14	113189	symbol	H. sapiens	113189	H. sapiens	CHST14	carbohydrate sulfotransferase 14	GO:0030208 dermatan sulfate biosynthetic process;GO:0030205 dermatan sulfate metabolic process;GO:0050651 dermatan sulfate proteoglycan biosynthetic process		Enzymes/ENZYME proteins/Transferases	Vesicles(Approved)				0.0	0.0	0.0	0.0	0.0	0.0	0.0	0.0	0.0	0.0	0.0	0.0	0.0	0.0	0.0	0.0	0.0	0.0	0.0	0.0
CHST15	51363	symbol	H. sapiens	51363	H. sapiens	CHST15	carbohydrate sulfotransferase 15	GO:0030206 chondroitin sulfate biosynthetic process;GO:0030204 chondroitin sulfate metabolic process;GO:0050650 chondroitin sulfate proteoglycan biosynthetic process		Enzymes/ENZYME proteins/Transferases	Centrosome;Cytosol(Approved)				0.0	0.0	0.0	0.0	0.0	0.0	0.0	0.0	0.0	0.0	0.0	0.0	0.0	0.0	0.0	0.0	0.0	0.0	0.0	0.0
CHST1	8534	symbol	H. sapiens	8534	H. sapiens	CHST1	carbohydrate sulfotransferase 1	GO:0018146 keratan sulfate biosynthetic process;GO:0042339 keratan sulfate metabolic process;GO:0006044 N-acetylglucosamine metabolic process		Enzymes/ENZYME proteins/Transferases				(M5937)HALLMARK GLYCOLYSIS	0.0	0.0	0.0	0.0	0.0	0.0	0.0	0.0	0.0	0.0	0.0	0.0	0.0	0.0	0.0	0.0	0.0	0.0	0.0	0.0
CHSY1	22856	symbol	H. sapiens	22856	H. sapiens	CHSY1	chondroitin sulfate synthase 1	GO:0030206 chondroitin sulfate biosynthetic process;GO:0030204 chondroitin sulfate metabolic process;GO:0050650 chondroitin sulfate proteoglycan biosynthetic process		Enzymes/ENZYME proteins/Transferases					0.0	0.0	0.0	0.0	0.0	0.0	0.0	0.0	1.0	0.0	0.0	1.0	0.0	0.0	0.0	0.0	0.0	0.0	0.0	0.0
CHSY3	337876	symbol	H. sapiens	337876	H. sapiens	CHSY3	chondroitin sulfate synthase 3	GO:0030206 chondroitin sulfate biosynthetic process;GO:0030204 chondroitin sulfate metabolic process;GO:0050650 chondroitin sulfate proteoglycan biosynthetic process		Enzymes/ENZYME proteins/Transferases					0.0	0.0	0.0	0.0	0.0	0.0	0.0	0.0	0.0	0.0	0.0	0.0	0.0	0.0	0.0	0.0	0.0	0.0	0.0	0.0
CLDN14	23562	symbol	H. sapiens	23562	H. sapiens	CLDN14	claudin 14	GO:0016338 calcium-independent cell-cell adhesion via plasma membrane cell-adhesion molecules;GO:0098742 cell-cell adhesion via plasma-membrane adhesion molecules;GO:0098609 cell-cell adhesion			Vesicles(Uncertain)			(M5915)HALLMARK APICAL JUNCTION	0.0	0.0	0.0	0.0	0.0	0.0	0.0	0.0	0.0	0.0	0.0	0.0	0.0	0.0	0.0	0.0	0.0	0.0	0.0	0.0
CLEC11A	6320	symbol	H. sapiens	6320	H. sapiens	CLEC11A	C-type lectin domain containing 11A	GO:0001503 ossification;GO:0008284 positive regulation of cell proliferation;GO:0042127 regulation of cell proliferation			Centrosome(Approved)		(M5880)NABA ECM AFFILIATED; (M5885)NABA MATRISOME ASSOCIATED; (M5889)NABA MATRISOME		0.0	0.0	0.0	0.0	1.0	0.0	0.0	0.0	0.0	0.0	0.0	1.0	0.0	0.0	0.0	0.0	0.0	0.0	0.0	0.0
CLEC4A	50856	symbol	H. sapiens	50856	H. sapiens	CLEC4A	C-type lectin domain family 4 member A	GO:0002470 plasmacytoid dendritic cell antigen processing and presentation;GO:0002223 stimulatory C-type lectin receptor signaling pathway;GO:0002220 innate immune response activating cell surface receptor signaling pathway					(M5880)NABA ECM AFFILIATED; (M5885)NABA MATRISOME ASSOCIATED; (M5889)NABA MATRISOME	(M5953)HALLMARK KRAS SIGNALING UP	0.0	0.0	0.0	0.0	1.0	0.0	0.0	0.0	0.0	0.0	0.0	0.0	0.0	0.0	0.0	0.0	0.0	0.0	0.0	0.0
CLEC5A	23601	symbol	H. sapiens	23601	H. sapiens	CLEC5A	C-type lectin domain containing 5A	GO:0033033 negative regulation of myeloid cell apoptotic process;GO:0046718 viral entry into host cell;GO:0030260 entry into host cell			Plasma membrane(Supported)Cytosol(Approved)		(M5880)NABA ECM AFFILIATED; (M5885)NABA MATRISOME ASSOCIATED; (M5889)NABA MATRISOME	(M5932)HALLMARK INFLAMMATORY RESPONSE	0.0	0.0	0.0	0.0	1.0	0.0	0.0	0.0	0.0	0.0	0.0	1.0	0.0	0.0	0.0	0.0	0.0	0.0	0.0	0.0
CLIC4	25932	symbol	H. sapiens	25932	H. sapiens	CLIC4	chloride intracellular channel 4	GO:0007035 vacuolar acidification;GO:0061299 retina vasculature morphogenesis in camera-type eye;GO:0051452 intracellular pH reduction		Transporters/Transporter channels and pores	Cytosol(Supported)				0.0	1.0	0.0	0.0	0.0	0.0	0.0	0.0	0.0	0.0	0.0	0.0	1.0	1.0	1.0	0.0	0.0	0.0	0.0	0.0
CLIP2	7461	symbol	H. sapiens	7461	H. sapiens	CLIP2	CAP-Gly domain containing linker protein 2							(M5893)HALLMARK MITOTIC SPINDLE	0.0	0.0	0.0	0.0	0.0	0.0	0.0	0.0	0.0	0.0	0.0	0.0	0.0	0.0	0.0	0.0	0.0	0.0	0.0	0.0
CLIP3	25999	symbol	H. sapiens	25999	H. sapiens	CLIP3	CAP-Gly domain containing linker protein 3	GO:0010828 positive regulation of glucose transmembrane transport;GO:0031115 negative regulation of microtubule polymerization;GO:0010827 regulation of glucose transmembrane transport							0.0	0.0	0.0	0.0	0.0	0.0	0.0	0.0	0.0	0.0	0.0	0.0	0.0	0.0	1.0	0.0	0.0	0.0	0.0	0.0
CMKLR1	1240	symbol	H. sapiens	1240	H. sapiens	CMKLR1	chemerin chemokine-like receptor 1	GO:0010759 positive regulation of macrophage chemotaxis;GO:1905523 positive regulation of macrophage migration;GO:0010758 regulation of macrophage chemotaxis		G-protein coupled receptors/GPCRs excl olfactory receptors;Transporters				(M5953)HALLMARK KRAS SIGNALING UP; (M5932)HALLMARK INFLAMMATORY RESPONSE; (M5913)HALLMARK INTERFERON GAMMA RESPONSE	0.0	0.0	0.0	1.0	0.0	0.0	0.0	0.0	1.0	0.0	0.0	0.0	0.0	0.0	0.0	0.0	0.0	0.0	0.0	0.0
CMTM3	123920	symbol	H. sapiens	123920	H. sapiens	CMTM3	CKLF like MARVEL transmembrane domain containing 3	GO:0050861 positive regulation of B cell receptor signaling pathway;GO:0050855 regulation of B cell receptor signaling pathway;GO:0050857 positive regulation of antigen receptor-mediated signaling pathway			Nucleoplasm(Approved)				0.0	0.0	0.0	1.0	0.0	0.0	0.0	0.0	0.0	0.0	0.0	0.0	0.0	0.0	0.0	0.0	0.0	0.0	0.0	1.0
CNIH3	149111	symbol	H. sapiens	149111	H. sapiens	CNIH3	cornichon family AMPA receptor auxiliary protein 3	GO:0048208 COPII vesicle coating;GO:0048207 vesicle targeting, rough ER to cis-Golgi;GO:2000311 regulation of AMPA receptor activity							0.0	0.0	0.0	0.0	0.0	0.0	0.0	0.0	0.0	0.0	0.0	0.0	0.0	0.0	0.0	0.0	0.0	0.0	0.0	0.0
CNPY4	245812	symbol	H. sapiens	245812	H. sapiens	CNPY4	canopy FGF signaling regulator 4	GO:1903078 positive regulation of protein localization to plasma membrane;GO:1904377 positive regulation of protein localization to cell periphery;GO:1903076 regulation of protein localization to plasma membrane			Vesicles(Approved)				0.0	0.0	0.0	0.0	0.0	0.0	0.0	0.0	0.0	0.0	0.0	0.0	0.0	0.0	0.0	0.0	0.0	0.0	0.0	0.0
CNRIP1	25927	symbol	H. sapiens	25927	H. sapiens	CNRIP1	cannabinoid receptor interacting protein 1	GO:2000272 negative regulation of signaling receptor activity;GO:0010469 regulation of signaling receptor activity;GO:0044092 negative regulation of molecular function			Cytosol(Approved)				0.0	0.0	0.0	0.0	0.0	0.0	0.0	0.0	0.0	0.0	0.0	0.0	0.0	0.0	0.0	0.0	0.0	0.0	0.0	0.0
CNTNAP1	8506	symbol	H. sapiens	8506	H. sapiens	CNTNAP1	contactin associated protein 1	GO:0030913 paranodal junction assembly;GO:0022010 central nervous system myelination;GO:0022011 myelination in peripheral nervous system			Nucleoplasm(Approved)				0.0	0.0	0.0	0.0	0.0	0.0	0.0	0.0	0.0	0.0	0.0	0.0	0.0	1.0	0.0	0.0	0.0	0.0	0.0	0.0
COL10A1	1300	symbol	H. sapiens	1300	H. sapiens	COL10A1	collagen type X alpha 1 chain	GO:0030198 extracellular matrix organization;GO:0043062 extracellular structure organization;GO:0001501 skeletal system development			Endoplasmic reticulum(Approved)		(M3005)NABA COLLAGENS; (M198)PID SYNDECAN 1 PATHWAY; (M160)PID AVB3 INTEGRIN PATHWAY		1.0	0.0	1.0	0.0	0.0	1.0	0.0	0.0	1.0	0.0	0.0	0.0	0.0	0.0	0.0	0.0	0.0	0.0	0.0	0.0
COL11A1	1301	symbol	H. sapiens	1301	H. sapiens	COL11A1	collagen type XI alpha 1 chain	GO:0050910 detection of mechanical stimulus involved in sensory perception of sound;GO:0055010 ventricular cardiac muscle tissue morphogenesis;GO:0035989 tendon development			Endoplasmic reticulum(Approved)		(M3005)NABA COLLAGENS; (M198)PID SYNDECAN 1 PATHWAY; (M18)PID INTEGRIN1 PATHWAY	(M5942)HALLMARK UV RESPONSE DN; (M5930)HALLMARK EPITHELIAL MESENCHYMAL TRANSITION	1.0	0.0	1.0	0.0	0.0	1.0	0.0	0.0	1.0	0.0	1.0	1.0	1.0	0.0	1.0	0.0	1.0	0.0	0.0	1.0
COL12A1	1303	symbol	H. sapiens	1303	H. sapiens	COL12A1	collagen type XII alpha 1 chain	GO:0003429 growth plate cartilage chondrocyte morphogenesis;GO:0003414 chondrocyte morphogenesis involved in endochondral bone morphogenesis;GO:0003422 growth plate cartilage morphogenesis			Nucleus(Approved)		(M3005)NABA COLLAGENS; (M198)PID SYNDECAN 1 PATHWAY; (M160)PID AVB3 INTEGRIN PATHWAY	(M5930)HALLMARK EPITHELIAL MESENCHYMAL TRANSITION	1.0	0.0	1.0	0.0	0.0	0.0	0.0	0.0	1.0	0.0	1.0	0.0	1.0	1.0	1.0	0.0	0.0	0.0	0.0	1.0
COL13A1	1305	symbol	H. sapiens	1305	H. sapiens	COL13A1	collagen type XIII alpha 1 chain	GO:0001958 endochondral ossification;GO:0060350 endochondral bone morphogenesis;GO:0036075 replacement ossification					(M3005)NABA COLLAGENS; (M198)PID SYNDECAN 1 PATHWAY; (M160)PID AVB3 INTEGRIN PATHWAY		1.0	0.0	1.0	0.0	1.0	1.0	1.0	0.0	1.0	0.0	0.0	1.0	1.0	0.0	0.0	0.0	0.0	0.0	0.0	0.0
COL15A1	1306	symbol	H. sapiens	1306	H. sapiens	COL15A1	collagen type XV alpha 1 chain	GO:0030574 collagen catabolic process;GO:0001525 angiogenesis;GO:0032963 collagen metabolic process			Endoplasmic reticulum(Approved)		(M5887)NABA BASEMENT MEMBRANES; (M3005)NABA COLLAGENS; (M198)PID SYNDECAN 1 PATHWAY	(M5905)HALLMARK ADIPOGENESIS; (M5909)HALLMARK MYOGENESIS	1.0	1.0	1.0	0.0	1.0	1.0	0.0	0.0	0.0	0.0	0.0	0.0	0.0	0.0	0.0	0.0	0.0	0.0	0.0	0.0
COL16A1	1307	symbol	H. sapiens	1307	H. sapiens	COL16A1	collagen type XVI alpha 1 chain	GO:0051894 positive regulation of focal adhesion assembly;GO:0051893 regulation of focal adhesion assembly;GO:1903393 positive regulation of adherens junction organization			Cytosol;Golgi apparatus;Plasma membrane(Approved)		(M3005)NABA COLLAGENS; (M198)PID SYNDECAN 1 PATHWAY; (M160)PID AVB3 INTEGRIN PATHWAY	(M5930)HALLMARK EPITHELIAL MESENCHYMAL TRANSITION; (M5915)HALLMARK APICAL JUNCTION	1.0	0.0	1.0	0.0	0.0	1.0	1.0	0.0	0.0	0.0	0.0	0.0	0.0	0.0	1.0	0.0	0.0	0.0	0.0	0.0
COL18A1	80781	symbol	H. sapiens	80781	H. sapiens	COL18A1	collagen type XVIII alpha 1 chain	GO:2000353 positive regulation of endothelial cell apoptotic process;GO:0001886 endothelial cell morphogenesis;GO:0051599 response to hydrostatic pressure			Golgi apparatus(Approved)		(M5887)NABA BASEMENT MEMBRANES; (M285)PID HNF3A PATHWAY; (M3005)NABA COLLAGENS		1.0	1.0	1.0	1.0	1.0	1.0	0.0	0.0	0.0	0.0	0.0	0.0	0.0	1.0	0.0	0.0	0.0	0.0	0.0	0.0
COL1A1	1277	symbol	H. sapiens	1277	H. sapiens	COL1A1	collagen type I alpha 1 chain	GO:0071306 cellular response to vitamin E;GO:1902618 cellular response to fluoride;GO:0044691 tooth eruption			Cytosol;Vesicles(Approved)	Collagenase clostridium histolyticum (Platelet-derived growth factor binding);Halofuginone (Platelet-derived growth factor binding)	(M274)PID LYMPH ANGIOGENESIS PATHWAY; (M53)PID INTEGRIN3 PATHWAY; (M3005)NABA COLLAGENS	(M5942)HALLMARK UV RESPONSE DN; (M5930)HALLMARK EPITHELIAL MESENCHYMAL TRANSITION; (M5909)HALLMARK MYOGENESIS	1.0	1.0	1.0	1.0	1.0	1.0	1.0	1.0	1.0	1.0	1.0	1.0	0.0	0.0	1.0	1.0	0.0	1.0	1.0	1.0
COL1A2	1278	symbol	H. sapiens	1278	H. sapiens	COL1A2	collagen type I alpha 2 chain	GO:0070208 protein heterotrimerization;GO:0043589 skin morphogenesis;GO:0085029 extracellular matrix assembly			Endoplasmic reticulum(Supported)	Collagenase clostridium histolyticum (Protein binding, bridging)	(M274)PID LYMPH ANGIOGENESIS PATHWAY; (M65)PID FRA PATHWAY; (M53)PID INTEGRIN3 PATHWAY	(M5942)HALLMARK UV RESPONSE DN; (M5930)HALLMARK EPITHELIAL MESENCHYMAL TRANSITION	1.0	1.0	1.0	1.0	1.0	1.0	0.0	1.0	1.0	1.0	1.0	1.0	0.0	0.0	1.0	1.0	0.0	0.0	1.0	0.0
COL22A1	169044	symbol	H. sapiens	169044	H. sapiens	COL22A1	collagen type XXII alpha 1 chain	GO:0030198 extracellular matrix organization;GO:0043062 extracellular structure organization;GO:0016043 cellular component organization			Vesicles(Supported)Endoplasmic reticulum(Approved)		(M3005)NABA COLLAGENS; (M5884)NABA CORE MATRISOME; (M5889)NABA MATRISOME		1.0	0.0	1.0	0.0	0.0	0.0	0.0	0.0	0.0	0.0	0.0	0.0	0.0	0.0	0.0	0.0	0.0	0.0	0.0	0.0
COL23A1	91522	symbol	H. sapiens	91522	H. sapiens	COL23A1	collagen type XXIII alpha 1 chain	GO:0001886 endothelial cell morphogenesis;GO:0003382 epithelial cell morphogenesis;GO:0001885 endothelial cell development					(M3005)NABA COLLAGENS; (M5884)NABA CORE MATRISOME; (M5889)NABA MATRISOME		1.0	1.0	1.0	0.0	0.0	1.0	0.0	0.0	0.0	0.0	0.0	0.0	0.0	1.0	0.0	0.0	0.0	0.0	0.0	0.0
COL24A1	255631	symbol	H. sapiens	255631	H. sapiens	COL24A1	collagen type XXIV alpha 1 chain	GO:0030198 extracellular matrix organization;GO:0043062 extracellular structure organization;GO:0016043 cellular component organization					(M3005)NABA COLLAGENS; (M166)PID ATF2 PATHWAY; (M5884)NABA CORE MATRISOME		1.0	0.0	1.0	0.0	0.0	1.0	0.0	0.0	0.0	0.0	0.0	0.0	0.0	0.0	0.0	0.0	0.0	0.0	0.0	0.0
COL27A1	85301	symbol	H. sapiens	85301	H. sapiens	COL27A1	collagen type XXVII alpha 1 chain	GO:0003431 growth plate cartilage chondrocyte development;GO:0003433 chondrocyte development involved in endochondral bone morphogenesis;GO:0003418 growth plate cartilage chondrocyte differentiation					(M3005)NABA COLLAGENS; (M5884)NABA CORE MATRISOME; (M5889)NABA MATRISOME		1.0	0.0	1.0	0.0	0.0	1.0	0.0	0.0	1.0	0.0	0.0	0.0	0.0	0.0	0.0	0.0	0.0	0.0	0.0	0.0
COL3A1	1281	symbol	H. sapiens	1281	H. sapiens	COL3A1	collagen type III alpha 1 chain	GO:0060414 aorta smooth muscle tissue morphogenesis;GO:2001223 negative regulation of neuron migration;GO:0035909 aorta morphogenesis				Collagenase clostridium histolyticum (Platelet-derived growth factor binding)	(M3005)NABA COLLAGENS; (M198)PID SYNDECAN 1 PATHWAY; (M8)PID ENDOTHELIN PATHWAY	(M5944)HALLMARK ANGIOGENESIS; (M5942)HALLMARK UV RESPONSE DN; (M5930)HALLMARK EPITHELIAL MESENCHYMAL TRANSITION	1.0	1.0	1.0	0.0	0.0	1.0	1.0	1.0	1.0	1.0	1.0	0.0	1.0	0.0	1.0	0.0	1.0	0.0	1.0	0.0
COL4A1	1282	symbol	H. sapiens	1282	H. sapiens	COL4A1	collagen type IV alpha 1 chain	GO:0061304 retinal blood vessel morphogenesis;GO:0061299 retina vasculature morphogenesis in camera-type eye;GO:0061298 retina vasculature development in camera-type eye			Cytosol;Nucleoplasm(Uncertain)		(M5887)NABA BASEMENT MEMBRANES; (M53)PID INTEGRIN3 PATHWAY; (M3005)NABA COLLAGENS	(M5905)HALLMARK ADIPOGENESIS; (M5930)HALLMARK EPITHELIAL MESENCHYMAL TRANSITION	1.0	1.0	1.0	0.0	0.0	1.0	0.0	1.0	0.0	0.0	0.0	0.0	1.0	0.0	0.0	1.0	0.0	0.0	0.0	0.0
COL4A2	1284	symbol	H. sapiens	1284	H. sapiens	COL4A2	collagen type IV alpha 2 chain	GO:0038063 collagen-activated tyrosine kinase receptor signaling pathway;GO:0035987 endodermal cell differentiation;GO:0016525 negative regulation of angiogenesis			Vesicles(Supported)		(M5887)NABA BASEMENT MEMBRANES; (M3005)NABA COLLAGENS; (M5884)NABA CORE MATRISOME	(M5921)HALLMARK COMPLEMENT; (M5930)HALLMARK EPITHELIAL MESENCHYMAL TRANSITION; (M5909)HALLMARK MYOGENESIS	1.0	1.0	1.0	0.0	0.0	1.0	0.0	1.0	0.0	0.0	0.0	0.0	0.0	0.0	0.0	0.0	0.0	0.0	1.0	1.0
COL5A1	1289	symbol	H. sapiens	1289	H. sapiens	COL5A1	collagen type V alpha 1 chain	GO:1903225 negative regulation of endodermal cell differentiation;GO:0035313 wound healing, spreading of epidermal cells;GO:1903224 regulation of endodermal cell differentiation			Vesicles(Approved)		(M3005)NABA COLLAGENS; (M198)PID SYNDECAN 1 PATHWAY; (M236)PID DELTA NP63 PATHWAY	(M5930)HALLMARK EPITHELIAL MESENCHYMAL TRANSITION; (M5937)HALLMARK GLYCOLYSIS; (M5891)HALLMARK HYPOXIA	1.0	1.0	1.0	0.0	1.0	1.0	0.0	0.0	1.0	1.0	1.0	0.0	1.0	0.0	1.0	0.0	1.0	0.0	0.0	1.0
COL5A2	1290	symbol	H. sapiens	1290	H. sapiens	COL5A2	collagen type V alpha 2 chain	GO:1903225 negative regulation of endodermal cell differentiation;GO:1903224 regulation of endodermal cell differentiation;GO:2000542 negative regulation of gastrulation					(M3005)NABA COLLAGENS; (M198)PID SYNDECAN 1 PATHWAY; (M18)PID INTEGRIN1 PATHWAY	(M5944)HALLMARK ANGIOGENESIS; (M5942)HALLMARK UV RESPONSE DN; (M5930)HALLMARK EPITHELIAL MESENCHYMAL TRANSITION	1.0	0.0	1.0	0.0	0.0	1.0	0.0	0.0	1.0	0.0	1.0	1.0	0.0	0.0	1.0	0.0	0.0	0.0	0.0	1.0
COL5A3	50509	symbol	H. sapiens	50509	H. sapiens	COL5A3	collagen type V alpha 3 chain	GO:0030199 collagen fibril organization;GO:0007160 cell-matrix adhesion;GO:0043588 skin development					(M3005)NABA COLLAGENS; (M5884)NABA CORE MATRISOME; (M5889)NABA MATRISOME	(M5930)HALLMARK EPITHELIAL MESENCHYMAL TRANSITION	1.0	0.0	1.0	0.0	0.0	1.0	1.0	0.0	0.0	0.0	1.0	0.0	0.0	0.0	1.0	0.0	0.0	0.0	0.0	0.0
COL6A1	1291	symbol	H. sapiens	1291	H. sapiens	COL6A1	collagen type VI alpha 1 chain	GO:0003429 growth plate cartilage chondrocyte morphogenesis;GO:0003414 chondrocyte morphogenesis involved in endochondral bone morphogenesis;GO:0003422 growth plate cartilage morphogenesis			Cytosol(Approved)		(M5887)NABA BASEMENT MEMBRANES; (M3005)NABA COLLAGENS; (M198)PID SYNDECAN 1 PATHWAY	(M5947)HALLMARK IL2 STAT5 SIGNALING	1.0	0.0	1.0	0.0	0.0	1.0	0.0	0.0	1.0	0.0	0.0	1.0	1.0	1.0	0.0	0.0	0.0	0.0	0.0	1.0
COL6A2	1292	symbol	H. sapiens	1292	H. sapiens	COL6A2	collagen type VI alpha 2 chain	GO:0003429 growth plate cartilage chondrocyte morphogenesis;GO:0003414 chondrocyte morphogenesis involved in endochondral bone morphogenesis;GO:0003422 growth plate cartilage morphogenesis			Cytosol;Plasma membrane(Approved)		(M5887)NABA BASEMENT MEMBRANES; (M3005)NABA COLLAGENS; (M198)PID SYNDECAN 1 PATHWAY	(M5930)HALLMARK EPITHELIAL MESENCHYMAL TRANSITION; (M5909)HALLMARK MYOGENESIS	1.0	0.0	1.0	0.0	0.0	1.0	0.0	0.0	1.0	0.0	0.0	0.0	1.0	1.0	0.0	0.0	0.0	0.0	0.0	0.0
COL6A3	1293	symbol	H. sapiens	1293	H. sapiens	COL6A3	collagen type VI alpha 3 chain	GO:0003429 growth plate cartilage chondrocyte morphogenesis;GO:0003414 chondrocyte morphogenesis involved in endochondral bone morphogenesis;GO:0003422 growth plate cartilage morphogenesis					(M5887)NABA BASEMENT MEMBRANES; (M3005)NABA COLLAGENS; (M198)PID SYNDECAN 1 PATHWAY	(M5930)HALLMARK EPITHELIAL MESENCHYMAL TRANSITION; (M5909)HALLMARK MYOGENESIS	1.0	0.0	1.0	0.0	0.0	1.0	0.0	0.0	1.0	0.0	0.0	0.0	1.0	1.0	0.0	0.0	1.0	0.0	0.0	0.0
COL7A1	1294	symbol	H. sapiens	1294	H. sapiens	COL7A1	collagen type VII alpha 1 chain	GO:0003429 growth plate cartilage chondrocyte morphogenesis;GO:0003414 chondrocyte morphogenesis involved in endochondral bone morphogenesis;GO:0003422 growth plate cartilage morphogenesis					(M3005)NABA COLLAGENS; (M198)PID SYNDECAN 1 PATHWAY; (M18)PID INTEGRIN1 PATHWAY	(M5930)HALLMARK EPITHELIAL MESENCHYMAL TRANSITION	1.0	0.0	1.0	0.0	0.0	1.0	0.0	0.0	1.0	0.0	0.0	0.0	1.0	1.0	0.0	0.0	0.0	0.0	0.0	1.0
COL8A1	1295	symbol	H. sapiens	1295	H. sapiens	COL8A1	collagen type VIII alpha 1 chain	GO:0035987 endodermal cell differentiation;GO:0001706 endoderm formation;GO:0048593 camera-type eye morphogenesis			Vesicles(Supported)		(M3005)NABA COLLAGENS; (M198)PID SYNDECAN 1 PATHWAY; (M160)PID AVB3 INTEGRIN PATHWAY		1.0	1.0	1.0	0.0	0.0	1.0	1.0	0.0	0.0	0.0	0.0	0.0	0.0	0.0	0.0	0.0	0.0	0.0	0.0	1.0
COL8A2	1296	symbol	H. sapiens	1296	H. sapiens	COL8A2	collagen type VIII alpha 2 chain	GO:0048593 camera-type eye morphogenesis;GO:0001525 angiogenesis;GO:0048592 eye morphogenesis			Golgi apparatus(Uncertain)		(M3005)NABA COLLAGENS; (M198)PID SYNDECAN 1 PATHWAY; (M160)PID AVB3 INTEGRIN PATHWAY	(M5930)HALLMARK EPITHELIAL MESENCHYMAL TRANSITION	1.0	1.0	1.0	0.0	0.0	1.0	0.0	0.0	0.0	0.0	0.0	0.0	0.0	0.0	0.0	0.0	0.0	0.0	0.0	0.0
COLEC12	81035	symbol	H. sapiens	81035	H. sapiens	COLEC12	collectin subfamily member 12	GO:0034138 toll-like receptor 3 signaling pathway;GO:0060355 positive regulation of cell adhesion molecule production;GO:0071360 cellular response to exogenous dsRNA			Cell Junctions;Golgi apparatus;Vesicles(Approved)		(M5880)NABA ECM AFFILIATED; (M5885)NABA MATRISOME ASSOCIATED; (M5889)NABA MATRISOME		0.0	0.0	0.0	0.0	1.0	0.0	0.0	0.0	0.0	0.0	0.0	0.0	0.0	0.0	0.0	0.0	0.0	0.0	0.0	0.0
CORIN	10699	symbol	H. sapiens	10699	H. sapiens	CORIN	corin, serine peptidase	GO:0003050 regulation of systemic arterial blood pressure by atrial natriuretic peptide;GO:0035813 regulation of renal sodium excretion;GO:0035812 renal sodium excretion		Enzymes/Peptidases/Serine-type peptidases	Plasma membrane(Approved)Actin filaments;Nuclear bodies(Uncertain)				0.0	0.0	0.0	0.0	0.0	0.0	0.0	0.0	0.0	0.0	0.0	0.0	0.0	0.0	0.0	0.0	0.0	0.0	0.0	0.0
COX7A1	1346	symbol	H. sapiens	1346	H. sapiens	COX7A1	cytochrome c oxidase subunit 7A1	GO:0002082 regulation of oxidative phosphorylation;GO:0097250 mitochondrial respiratory chain supercomplex assembly;GO:1903578 regulation of ATP metabolic process		Transporters/Primary Active Transporters		Cholic Acid (Cytochrome-c oxidase activity);N-Formylmethionine (Cytochrome-c oxidase activity)		(M5909)HALLMARK MYOGENESIS	0.0	0.0	0.0	0.0	0.0	0.0	0.0	0.0	0.0	0.0	0.0	0.0	0.0	0.0	0.0	0.0	0.0	0.0	0.0	0.0
CPXM1	56265	symbol	H. sapiens	56265	H. sapiens	CPXM1	carboxypeptidase X, M14 family member 1	GO:0016485 protein processing;GO:0051604 protein maturation;GO:0006518 peptide metabolic process		Enzymes/Peptidases/Metallopeptidases					0.0	0.0	0.0	0.0	0.0	0.0	0.0	0.0	0.0	0.0	0.0	0.0	0.0	0.0	0.0	0.0	0.0	0.0	0.0	0.0
CPZ	8532	symbol	H. sapiens	8532	H. sapiens	CPZ	carboxypeptidase Z	GO:0016485 protein processing;GO:0016055 Wnt signaling pathway;GO:0198738 cell-cell signaling by wnt		Enzymes/Peptidases/Metallopeptidases					0.0	0.0	0.0	0.0	0.0	0.0	0.0	0.0	0.0	0.0	0.0	0.0	0.0	0.0	0.0	0.0	0.0	0.0	0.0	0.0
CRISPLD1	83690	symbol	H. sapiens	83690	H. sapiens	CRISPLD1	cysteine rich secretory protein LCCL domain containing 1	GO:0060325 face morphogenesis;GO:0060323 head morphogenesis;GO:0060324 face development					(M3008)NABA ECM GLYCOPROTEINS; (M5884)NABA CORE MATRISOME; (M5889)NABA MATRISOME		1.0	0.0	0.0	0.0	0.0	0.0	0.0	0.0	0.0	0.0	0.0	0.0	0.0	0.0	0.0	0.0	0.0	0.0	0.0	0.0
CRISPLD2	83716	symbol	H. sapiens	83716	H. sapiens	CRISPLD2	cysteine rich secretory protein LCCL domain containing 2	GO:0060325 face morphogenesis;GO:0043312 neutrophil degranulation;GO:0002283 neutrophil activation involved in immune response			Nucleoli;Nucleus(Approved)		(M3008)NABA ECM GLYCOPROTEINS; (M5884)NABA CORE MATRISOME; (M5889)NABA MATRISOME		1.0	0.0	0.0	0.0	0.0	0.0	0.0	0.0	0.0	0.0	0.0	0.0	0.0	0.0	0.0	0.0	0.0	0.0	0.0	0.0
CRYGN	155051	symbol	H. sapiens	155051	H. sapiens	CRYGN	crystallin gamma N	GO:0002088 lens development in camera-type eye;GO:0007601 visual perception;GO:0043010 camera-type eye development							0.0	0.0	0.0	0.0	0.0	0.0	0.0	0.0	0.0	0.0	0.0	0.0	0.0	0.0	0.0	0.0	0.0	0.0	0.0	0.0
CSDC2	27254	symbol	H. sapiens	27254	H. sapiens	CSDC2	cold shock domain containing C2	GO:0043488 regulation of mRNA stability;GO:0061013 regulation of mRNA catabolic process;GO:0043487 regulation of RNA stability			Cytosol;Nucleoplasm(Approved)				0.0	0.0	0.0	0.0	0.0	0.0	0.0	0.0	0.0	0.0	0.0	0.0	0.0	0.0	0.0	0.0	0.0	0.0	0.0	0.0
CSF1R	1436	symbol	H. sapiens	1436	H. sapiens	CSF1R	colony stimulating factor 1 receptor	GO:0090197 positive regulation of chemokine secretion;GO:0038145 macrophage colony-stimulating factor signaling pathway;GO:0090196 regulation of chemokine secretion	Tyr protein kinase family	CD markers;Enzymes/{ENZYME proteins/Transferases,Kinases/Tyr protein kinases};RAS pathway related proteins	Plasma membrane(Supported)Vesicles(Approved)	Imatinib (Protein homodimerization activity);Sunitinib (Protein homodimerization activity);ABT-869 (Protein homodimerization activity);5-CYANO-FURAN-2-CARBOXYLIC ACID [5-HYDROXYMETHYL-2-(4-METHYL-PIPERIDIN-1-YL)-PHENYL]-AMIDE (Protein homodimerization activity);6-CHLORO-3-(3-METHYLISOXAZOL-5-YL)-4-PHENYLQUINOLIN-2(1H)-ONE (Protein homodimerization activity)	(M91)PID TCPTP PATHWAY; (M50)PID PTP1B PATHWAY; (M160)PID AVB3 INTEGRIN PATHWAY		0.0	0.0	1.0	1.0	0.0	1.0	0.0	1.0	0.0	0.0	0.0	0.0	1.0	1.0	1.0	0.0	0.0	0.0	0.0	0.0
CSF1	1435	symbol	H. sapiens	1435	H. sapiens	CSF1	colony stimulating factor 1	GO:1902228 positive regulation of macrophage colony-stimulating factor signaling pathway;GO:1904141 positive regulation of microglial cell migration;GO:1903974 positive regulation of cellular response to macrophage colony-stimulating factor stimulus		RAS pathway related proteins			(M11736)SA MMP CYTOKINE CONNECTION; (M91)PID TCPTP PATHWAY; (M50)PID PTP1B PATHWAY	(M5897)HALLMARK IL6 JAK STAT3 SIGNALING; (M5911)HALLMARK INTERFERON ALPHA RESPONSE; (M5947)HALLMARK IL2 STAT5 SIGNALING	0.0	0.0	1.0	1.0	1.0	1.0	1.0	1.0	1.0	0.0	0.0	1.0	1.0	1.0	0.0	0.0	0.0	0.0	0.0	0.0
CSF2	1437	symbol	H. sapiens	1437	H. sapiens	CSF2	colony stimulating factor 2	GO:0032747 positive regulation of interleukin-23 production;GO:0045187 regulation of circadian sleep/wake cycle, sleep;GO:0030223 neutrophil differentiation			Vesicles(Enhanced)	KB002 (Granulocyte macrophage colony-stimulating factor receptor binding)	(M118)PID INTEGRIN A9B1 PATHWAY; (M235)PID TCR CALCIUM PATHWAY; (M240)PID SYNDECAN 2 PATHWAY	(M5897)HALLMARK IL6 JAK STAT3 SIGNALING; (M5947)HALLMARK IL2 STAT5 SIGNALING; (M5890)HALLMARK TNFA SIGNALING VIA NFKB	0.0	0.0	0.0	0.0	1.0	1.0	0.0	0.0	0.0	0.0	0.0	0.0	0.0	0.0	1.0	0.0	0.0	0.0	0.0	1.0
CSGALNACT2	55454	symbol	H. sapiens	55454	H. sapiens	CSGALNACT2	chondroitin sulfate N-acetylgalactosaminyltransferase 2	GO:0050652 dermatan sulfate proteoglycan biosynthetic process, polysaccharide chain biosynthetic process;GO:0050653 chondroitin sulfate proteoglycan biosynthetic process, polysaccharide chain biosynthetic process;GO:0050651 dermatan sulfate proteoglycan biosynthetic process		Enzymes/ENZYME proteins/Transferases	Endoplasmic reticulum(Approved)				0.0	0.0	0.0	0.0	0.0	0.0	0.0	0.0	0.0	0.0	0.0	0.0	0.0	0.0	0.0	0.0	0.0	0.0	0.0	0.0
CSMD2	114784	symbol	H. sapiens	114784	H. sapiens	CSMD2	CUB and Sushi multiple domains 2								0.0	0.0	0.0	0.0	0.0	0.0	0.0	0.0	0.0	0.0	0.0	0.0	0.0	0.0	0.0	0.0	0.0	0.0	0.0	0.0
CSPG4	1464	symbol	H. sapiens	1464	H. sapiens	CSPG4	chondroitin sulfate proteoglycan 4	GO:0030208 dermatan sulfate biosynthetic process;GO:0030207 chondroitin sulfate catabolic process;GO:0030205 dermatan sulfate metabolic process			Nucleus;Plasma membrane(Approved)		(M18)PID INTEGRIN1 PATHWAY; (M5880)NABA ECM AFFILIATED; (M5885)NABA MATRISOME ASSOCIATED		0.0	1.0	0.0	0.0	1.0	1.0	0.0	1.0	0.0	0.0	0.0	0.0	0.0	0.0	0.0	0.0	0.0	0.0	0.0	0.0
CTGF	1490	gene_synonym	H. sapiens	1490	H. sapiens	CCN2	cellular communication network factor 2	GO:0060452 positive regulation of cardiac muscle contraction;GO:0051496 positive regulation of stress fiber assembly;GO:0070318 positive regulation of G0 to G1 transition					(M159)PID AMB2 NEUTROPHILS PATHWAY; (M286)PID TGFBR PATHWAY; (M3008)NABA ECM GLYCOPROTEINS	(M5930)HALLMARK EPITHELIAL MESENCHYMAL TRANSITION; (M5891)HALLMARK HYPOXIA	1.0	1.0	0.0	0.0	1.0	0.0	1.0	1.0	1.0	1.0	0.0	1.0	0.0	0.0	1.0	0.0	0.0	0.0	0.0	0.0
CTHRC1	115908	symbol	H. sapiens	115908	H. sapiens	CTHRC1	collagen triple helix repeat containing 1	GO:0090177 establishment of planar polarity involved in neural tube closure;GO:0043932 ossification involved in bone remodeling;GO:0060122 inner ear receptor cell stereocilium organization			Nucleoplasm(Approved)		(M77)PID WNT SIGNALING PATHWAY; (M23)PID WNT NONCANONICAL PATHWAY; (M3008)NABA ECM GLYCOPROTEINS	(M5930)HALLMARK EPITHELIAL MESENCHYMAL TRANSITION	1.0	0.0	0.0	0.0	0.0	0.0	0.0	0.0	0.0	0.0	0.0	1.0	1.0	0.0	0.0	0.0	0.0	0.0	0.0	1.0
CTSK	1513	symbol	H. sapiens	1513	H. sapiens	CTSK	cathepsin K	GO:0001957 intramembranous ossification;GO:0002224 toll-like receptor signaling pathway;GO:0045616 regulation of keratinocyte differentiation		Enzymes/{ENZYME proteins/Hydrolases,Peptidases/Cysteine-type peptidases}	Vesicles(Supported)	[1-(4-Fluorobenzyl)Cyclobutyl]Methyl (1s)-1-[Oxo(1h-Pyrazol-5-Ylamino)Acetyl]Pentylcarbamate (Proteoglycan binding);3-amino-5-phenylpentane (Proteoglycan binding);1-[N[(Phenylmethoxy)Carbonyl]-L-Leucyl-4-[[N/N-[(Phenylmethoxy)Carbonyl]-/Nl-Leucyl]Amino]-3-Pyrrolidinone/N (Proteoglycan binding);N2-[(benzyloxy)carbonyl]-n1-[(3S)-1-cyanopyrrolidin-3-yl]-l-leucinamide (Proteoglycan binding);Benzofura…	(M3468)NABA ECM REGULATORS; (M5885)NABA MATRISOME ASSOCIATED; (M5889)NABA MATRISOME	(M5946)HALLMARK COAGULATION	1.0	0.0	1.0	0.0	1.0	0.0	0.0	0.0	1.0	0.0	0.0	1.0	0.0	0.0	0.0	0.0	0.0	0.0	0.0	0.0
CTSL1	1514	gene_synonym	H. sapiens	1514	H. sapiens	CTSL	cathepsin L	GO:0071888 macrophage apoptotic process;GO:0002224 toll-like receptor signaling pathway;GO:0045616 regulation of keratinocyte differentiation		Enzymes/{ENZYME proteins/Hydrolases,Peptidases/Cysteine-type peptidases}		Cysteinesulfonic Acid (Serpin family protein binding);BIPHENYL-4-YL-ACETALDEHYDE (Serpin family protein binding)	(M3468)NABA ECM REGULATORS; (M5885)NABA MATRISOME ASSOCIATED; (M5889)NABA MATRISOME	(M5921)HALLMARK COMPLEMENT	1.0	0.0	1.0	0.0	1.0	0.0	0.0	0.0	0.0	0.0	0.0	0.0	0.0	0.0	0.0	0.0	0.0	0.0	0.0	0.0
CTSZ	1522	symbol	H. sapiens	1522	H. sapiens	CTSZ	cathepsin Z	GO:0002003 angiotensin maturation;GO:0002002 regulation of angiotensin levels in blood;GO:0001991 regulation of systemic arterial blood pressure by circulatory renin-angiotensin		Enzymes/{ENZYME proteins/Hydrolases,Peptidases/Cysteine-type peptidases}	Vesicles(Supported)		(M3468)NABA ECM REGULATORS; (M5885)NABA MATRISOME ASSOCIATED; (M5889)NABA MATRISOME	(M5947)HALLMARK IL2 STAT5 SIGNALING	0.0	0.0	0.0	0.0	1.0	0.0	0.0	0.0	0.0	0.0	0.0	0.0	1.0	1.0	0.0	0.0	0.0	0.0	0.0	0.0
CXCL5	6374	symbol	H. sapiens	6374	H. sapiens	CXCL5	C-X-C motif chemokine ligand 5	GO:0030593 neutrophil chemotaxis;GO:1990266 neutrophil migration;GO:0071621 granulocyte chemotaxis					(M5883)NABA SECRETED FACTORS; (M5885)NABA MATRISOME ASSOCIATED; (M5889)NABA MATRISOME		0.0	0.0	0.0	1.0	1.0	0.0	0.0	0.0	0.0	0.0	0.0	0.0	0.0	0.0	0.0	0.0	0.0	0.0	0.0	0.0
CYBB	1536	symbol	H. sapiens	1536	H. sapiens	CYBB	cytochrome b-245 beta chain	GO:1904845 cellular response to L-glutamine;GO:1904044 response to aldosterone;GO:1904844 response to L-glutamine		Transporters/Transport Electron Carriers		Dextromethorphan (Voltage-gated ion channel activity)	(M278)PID RAC1 PATHWAY	(M5932)HALLMARK INFLAMMATORY RESPONSE	0.0	1.0	0.0	0.0	0.0	1.0	0.0	1.0	0.0	0.0	0.0	0.0	0.0	0.0	0.0	0.0	0.0	0.0	0.0	0.0
CYGB	114757	symbol	H. sapiens	114757	H. sapiens	CYGB	cytoglobin	GO:2000490 negative regulation of hepatic stellate cell activation;GO:0010764 negative regulation of fibroblast migration;GO:2000489 regulation of hepatic stellate cell activation		Transporters/Transporter channels and pores	Nuclear speckles(Enhanced)				0.0	1.0	0.0	0.0	1.0	0.0	0.0	0.0	0.0	0.0	0.0	0.0	0.0	0.0	0.0	0.0	0.0	0.0	0.0	0.0
CYR61	3491	gene_synonym	H. sapiens	3491	H. sapiens	CCN1	cellular communication network factor 1	GO:0002041 intussusceptive angiogenesis;GO:2000304 positive regulation of ceramide biosynthetic process;GO:0060710 chorio-allantoic fusion					(M212)PID INTEGRIN5 PATHWAY; (M169)PID INTEGRIN2 PATHWAY; (M53)PID INTEGRIN3 PATHWAY	(M5942)HALLMARK UV RESPONSE DN; (M5890)HALLMARK TNFA SIGNALING VIA NFKB; (M5930)HALLMARK EPITHELIAL MESENCHYMAL TRANSITION	1.0	1.0	0.0	1.0	0.0	0.0	1.0	1.0	1.0	1.0	0.0	1.0	1.0	0.0	0.0	1.0	1.0	0.0	1.0	1.0
CYS1	192668	symbol	H. sapiens	192668	H. sapiens	CYS1	cystin 1								0.0	0.0	0.0	0.0	0.0	0.0	0.0	0.0	0.0	0.0	0.0	0.0	0.0	0.0	0.0	0.0	0.0	0.0	0.0	0.0
CYTH3	9265	symbol	H. sapiens	9265	H. sapiens	CYTH3	cytohesin 3	GO:0032012 regulation of ARF protein signal transduction;GO:0032011 ARF protein signal transduction;GO:0090162 establishment of epithelial cell polarity			Cytosol(Supported)Nucleoplasm(Uncertain)	Inositol 1,3,4,5-Tetrakisphosphate (Phosphatidylinositol-3,4,5-trisphosphate binding);Inositol-(1,3,4,5,6)-Pentakisphosphate (Phosphatidylinositol-3,4,5-trisphosphate binding)	(M86)PID ARF6 PATHWAY; (M1315)SIG PIP3 SIGNALING IN B LYMPHOCYTES; (M14532)ST PHOSPHOINOSITIDE 3 KINASE PATHWAY		0.0	0.0	0.0	0.0	0.0	0.0	1.0	0.0	0.0	0.0	0.0	0.0	0.0	0.0	0.0	0.0	0.0	0.0	0.0	0.0
CYTH4	27128	symbol	H. sapiens	27128	H. sapiens	CYTH4	cytohesin 4	GO:0032012 regulation of ARF protein signal transduction;GO:0032011 ARF protein signal transduction;GO:0046578 regulation of Ras protein signal transduction							0.0	0.0	0.0	0.0	0.0	0.0	0.0	0.0	0.0	0.0	0.0	0.0	0.0	0.0	0.0	0.0	0.0	0.0	0.0	0.0
CYTSB	92521	gene_synonym	H. sapiens	92521	H. sapiens	SPECC1	sperm antigen with calponin homology and coiled-coil domains 1	GO:0030036 actin cytoskeleton organization;GO:0030029 actin filament-based process;GO:0007010 cytoskeleton organization							0.0	0.0	0.0	0.0	0.0	0.0	0.0	0.0	0.0	0.0	0.0	0.0	0.0	0.0	1.0	0.0	0.0	0.0	0.0	0.0
DAB1	1600	symbol	H. sapiens	1600	H. sapiens	DAB1	DAB adaptor protein 1	GO:0021813 cell-cell adhesion involved in neuronal-glial interactions involved in cerebral cortex radial glia guided migration;GO:0021812 neuronal-glial interaction involved in cerebral cortex radial glia guided migration;GO:0021589 cerebellum structural organization			Vesicles(Supported)		(M163)PID LIS1 PATHWAY; (M69)PID REELIN PATHWAY		0.0	0.0	0.0	1.0	0.0	0.0	1.0	0.0	0.0	0.0	0.0	0.0	0.0	1.0	0.0	0.0	0.0	0.0	0.0	0.0
DAB2	1601	symbol	H. sapiens	1601	H. sapiens	DAB2	DAB adaptor protein 2	GO:2000096 positive regulation of Wnt signaling pathway, planar cell polarity pathway;GO:0060766 negative regulation of androgen receptor signaling pathway;GO:2000095 regulation of Wnt signaling pathway, planar cell polarity pathway			Plasma membrane;Vesicles(Enhanced)Nucleoli fibrillar center(Approved)		(M286)PID TGFBR PATHWAY	(M5942)HALLMARK UV RESPONSE DN; (M5930)HALLMARK EPITHELIAL MESENCHYMAL TRANSITION	0.0	0.0	0.0	1.0	0.0	0.0	0.0	1.0	0.0	0.0	0.0	0.0	1.0	0.0	0.0	0.0	0.0	1.0	1.0	0.0
DACT1	51339	symbol	H. sapiens	51339	H. sapiens	DACT1	dishevelled binding antagonist of beta catenin 1	GO:1904864 negative regulation of beta-catenin-TCF complex assembly;GO:1904863 regulation of beta-catenin-TCF complex assembly;GO:2000095 regulation of Wnt signaling pathway, planar cell polarity pathway			Nucleoplasm(Supported)		(M17761)ST WNT BETA CATENIN PATHWAY		0.0	0.0	0.0	0.0	0.0	0.0	0.0	0.0	0.0	0.0	0.0	0.0	1.0	0.0	0.0	0.0	0.0	0.0	1.0	1.0
DACT3	147906	symbol	H. sapiens	147906	H. sapiens	DACT3	dishevelled binding antagonist of beta catenin 3	GO:0010719 negative regulation of epithelial to mesenchymal transition;GO:0010717 regulation of epithelial to mesenchymal transition;GO:0090090 negative regulation of canonical Wnt signaling pathway			Nucleoplasm;Vesicles(Approved)				0.0	0.0	0.0	0.0	0.0	0.0	0.0	0.0	0.0	0.0	0.0	0.0	0.0	1.0	0.0	0.0	0.0	1.0	0.0	0.0
DAPK3	1613	symbol	H. sapiens	1613	H. sapiens	DAPK3	death associated protein kinase 3	GO:0043519 regulation of myosin II filament organization;GO:2001241 positive regulation of extrinsic apoptotic signaling pathway in absence of ligand;GO:0031038 myosin II filament organization	CAMK Ser/Thr protein kinase family	Enzymes/{ENZYME proteins/Transferases,Kinases/CAMK Ser/Thr protein kinases}	Nucleus(Approved)	2-(1,1-DIMETHYLETHYL)9-FLUORO-3,6-DIHYDRO-7H-BENZ[H]-IMIDAZ[4,5-F]ISOQUINOLIN-7-ONE (Rho gtpase binding);4-(6-{[(1R)-1-(hydroxymethyl)propyl]amino}imidazo[1,2-b]pyridazin-3-yl)benzoic acid (Rho gtpase binding);(4R)-7,8-dichloro-1',9-dimethyl-1-oxo-1,2,4,9-tetrahydrospiro[beta-carboline-3,4'-piperidine]-4-carbonitrile (Rho gtpase binding)			0.0	0.0	0.0	1.0	0.0	0.0	1.0	0.0	0.0	0.0	0.0	0.0	0.0	0.0	1.0	0.0	0.0	0.0	0.0	0.0
DCBLD1	285761	symbol	H. sapiens	285761	H. sapiens	DCBLD1	discoidin, CUB and LCCL domain containing 1								0.0	0.0	0.0	0.0	0.0	0.0	0.0	0.0	0.0	0.0	0.0	0.0	0.0	0.0	0.0	0.0	0.0	0.0	0.0	0.0
DCHS1	8642	symbol	H. sapiens	8642	H. sapiens	DCHS1	dachsous cadherin-related 1	GO:0003192 mitral valve formation;GO:0001658 branching involved in ureteric bud morphogenesis;GO:0003273 cell migration involved in endocardial cushion formation			Plasma membrane(Approved)				0.0	0.0	0.0	0.0	0.0	0.0	0.0	0.0	1.0	0.0	0.0	1.0	1.0	0.0	0.0	0.0	1.0	1.0	0.0	1.0
DCLK2	166614	symbol	H. sapiens	166614	H. sapiens	DCLK2	doublecortin like kinase 2	GO:0021860 pyramidal neuron development;GO:0021859 pyramidal neuron differentiation;GO:0021884 forebrain neuron development	CAMK Ser/Thr protein kinase family	Enzymes/{ENZYME proteins/Transferases,Kinases/CAMK Ser/Thr protein kinases}					0.0	0.0	0.0	0.0	0.0	0.0	0.0	0.0	0.0	0.0	0.0	0.0	0.0	0.0	0.0	0.0	0.0	0.0	0.0	0.0
DCLK3	85443	symbol	H. sapiens	85443	H. sapiens	DCLK3	doublecortin like kinase 3	GO:1900181 negative regulation of protein localization to nucleus;GO:1900180 regulation of protein localization to nucleus;GO:1903828 negative regulation of cellular protein localization	CAMK Ser/Thr protein kinase family	Enzymes/{ENZYME proteins/Transferases,Kinases/CAMK Ser/Thr protein kinases}					0.0	0.0	0.0	0.0	0.0	0.0	0.0	0.0	0.0	0.0	0.0	0.0	0.0	0.0	0.0	0.0	0.0	0.0	0.0	0.0
DCN	1634	symbol	H. sapiens	1634	H. sapiens	DCN	decorin	GO:0030208 dermatan sulfate biosynthetic process;GO:1900747 negative regulation of vascular endothelial growth factor signaling pathway;GO:0030207 chondroitin sulfate catabolic process				Tris (Poly(a) rna binding)	(M5882)NABA PROTEOGLYCANS; (M65)PID FRA PATHWAY; (M5884)NABA CORE MATRISOME	(M5902)HALLMARK APOPTOSIS; (M5930)HALLMARK EPITHELIAL MESENCHYMAL TRANSITION; (M5937)HALLMARK GLYCOLYSIS	1.0	1.0	1.0	0.0	0.0	1.0	0.0	1.0	0.0	1.0	0.0	0.0	0.0	0.0	1.0	0.0	1.0	0.0	1.0	0.0
DDR2	4921	symbol	H. sapiens	4921	H. sapiens	DDR2	discoidin domain receptor tyrosine kinase 2	GO:0090091 positive regulation of extracellular matrix disassembly;GO:0010763 positive regulation of fibroblast migration;GO:0010715 regulation of extracellular matrix disassembly	Tyr protein kinase family	CD markers;Enzymes/{ENZYME proteins/Transferases,Kinases/Tyr protein kinases}	Plasma membrane(Supported)Actin filaments(Approved)	Regorafenib (Transmembrane receptor protein tyrosine kinase activity)			1.0	1.0	0.0	1.0	1.0	1.0	1.0	1.0	1.0	0.0	1.0	1.0	0.0	0.0	1.0	0.0	0.0	0.0	0.0	0.0
DENND2A	27147	symbol	H. sapiens	27147	H. sapiens	DENND2A	DENN domain containing 2A	GO:0042147 retrograde transport, endosome to Golgi;GO:0016482 cytosolic transport;GO:0016197 endosomal transport							0.0	0.0	0.0	0.0	0.0	0.0	0.0	0.0	0.0	0.0	0.0	0.0	0.0	0.0	0.0	0.0	0.0	0.0	0.0	0.0
DENND5A	23258	symbol	H. sapiens	23258	H. sapiens	DENND5A	DENN domain containing 5A	GO:0010977 negative regulation of neuron projection development;GO:0045665 negative regulation of neuron differentiation;GO:0042147 retrograde transport, endosome to Golgi			Golgi apparatus;Vesicles(Approved)			(M5947)HALLMARK IL2 STAT5 SIGNALING; (M5890)HALLMARK TNFA SIGNALING VIA NFKB	0.0	0.0	0.0	0.0	0.0	0.0	0.0	0.0	0.0	0.0	0.0	0.0	0.0	1.0	0.0	0.0	0.0	0.0	0.0	0.0
DFNA5	1687	gene_synonym	H. sapiens	1687	H. sapiens	GSDME	gasdermin E	GO:2001244 positive regulation of intrinsic apoptotic signaling pathway;GO:0070269 pyroptosis;GO:0060113 inner ear receptor cell differentiation		Transporters/Transporter channels and pores	Cytosol(Enhanced)			(M5898)HALLMARK DNA REPAIR	0.0	0.0	0.0	0.0	0.0	0.0	0.0	0.0	0.0	0.0	0.0	0.0	0.0	0.0	0.0	0.0	0.0	0.0	0.0	0.0
DGKI	9162	symbol	H. sapiens	9162	H. sapiens	DGKI	diacylglycerol kinase iota	GO:1900452 regulation of long-term synaptic depression;GO:0046959 habituation;GO:0060292 long-term synaptic depression		Enzymes/ENZYME proteins/Transferases	Nucleoplasm(Approved)				0.0	0.0	0.0	0.0	0.0	0.0	0.0	0.0	0.0	1.0	0.0	0.0	0.0	0.0	0.0	0.0	0.0	0.0	0.0	0.0
DIRC1	116093	symbol	H. sapiens	116093	H. sapiens	DIRC1	disrupted in renal carcinoma 1				Nucleoplasm(Approved)				0.0	0.0	0.0	0.0	0.0	0.0	0.0	0.0	0.0	0.0	0.0	0.0	0.0	0.0	0.0	0.0	0.0	0.0	0.0	0.0
DIXDC1	85458	symbol	H. sapiens	85458	H. sapiens	DIXDC1	DIX domain containing 1	GO:0021799 cerebral cortex radially oriented cell migration;GO:0021869 forebrain ventricular zone progenitor cell division;GO:0021795 cerebral cortex cell migration			Cytosol(Supported)		(M5493)WNT SIGNALING		0.0	0.0	0.0	0.0	0.0	0.0	0.0	0.0	0.0	0.0	0.0	0.0	0.0	1.0	1.0	0.0	0.0	0.0	0.0	0.0
DKK2	27123	symbol	H. sapiens	27123	H. sapiens	DKK2	dickkopf WNT signaling pathway inhibitor 2	GO:0090263 positive regulation of canonical Wnt signaling pathway;GO:0090090 negative regulation of canonical Wnt signaling pathway;GO:2000272 negative regulation of signaling receptor activity			Golgi apparatus(Supported)		(M17761)ST WNT BETA CATENIN PATHWAY; (M70)PID PS1 PATHWAY		0.0	0.0	0.0	0.0	0.0	0.0	0.0	0.0	0.0	0.0	0.0	0.0	0.0	0.0	0.0	0.0	0.0	0.0	0.0	0.0
DKK3	27122	symbol	H. sapiens	27122	H. sapiens	DKK3	dickkopf WNT signaling pathway inhibitor 3	GO:2000065 negative regulation of cortisol biosynthetic process;GO:0032348 negative regulation of aldosterone biosynthetic process;GO:0032345 negative regulation of aldosterone metabolic process			Vesicles(Approved)		(M17761)ST WNT BETA CATENIN PATHWAY		0.0	0.0	0.0	0.0	0.0	0.0	0.0	1.0	0.0	0.0	0.0	0.0	0.0	0.0	0.0	0.0	0.0	0.0	1.0	0.0
DLC1	10395	symbol	H. sapiens	10395	H. sapiens	DLC1	DLC1 Rho GTPase activating protein	GO:0051497 negative regulation of stress fiber assembly;GO:0051895 negative regulation of focal adhesion assembly;GO:0032232 negative regulation of actin filament bundle assembly			Golgi apparatus;Nucleoplasm;Vesicles(Approved)		(M68)PID RHOA REG PATHWAY	(M5942)HALLMARK UV RESPONSE DN; (M5906)HALLMARK ESTROGEN RESPONSE EARLY	0.0	0.0	0.0	0.0	0.0	0.0	1.0	0.0	0.0	0.0	0.0	0.0	1.0	0.0	1.0	0.0	1.0	0.0	0.0	1.0
DLG4	1742	symbol	H. sapiens	1742	H. sapiens	DLG4	discs large MAGUK scaffold protein 4	GO:0150012 positive regulation of neuron projection arborization;GO:0150011 regulation of neuron projection arborization;GO:0097113 AMPA glutamate receptor clustering		Transporters/Accessory Factors Involved in Transport	Vesicles(Approved)	Guanidine (Scaffold protein binding);Guanosine-5'-Monophosphate (Scaffold protein binding)	(M15743)ST GA12 PATHWAY; (M2701)ST MYOCYTE AD PATHWAY; (M12645)ST GA13 PATHWAY	(M5949)HALLMARK PEROXISOME; (M5941)HALLMARK UV RESPONSE UP	0.0	0.0	0.0	0.0	0.0	0.0	0.0	0.0	0.0	0.0	0.0	0.0	0.0	1.0	0.0	0.0	0.0	0.0	0.0	0.0
DLL4	54567	symbol	H. sapiens	54567	H. sapiens	DLL4	delta like canonical Notch ligand 4	GO:1903588 negative regulation of blood vessel endothelial cell proliferation involved in sprouting angiogenesis;GO:0090051 negative regulation of cell migration involved in sprouting angiogenesis;GO:0035912 dorsal aorta morphogenesis					(M17)PID NOTCH PATHWAY		0.0	1.0	0.0	0.0	0.0	0.0	0.0	1.0	0.0	0.0	0.0	0.0	1.0	0.0	0.0	0.0	1.0	0.0	0.0	1.0
DOCK4	9732	symbol	H. sapiens	9732	H. sapiens	DOCK4	dedicator of cytokinesis 4	GO:1904694 negative regulation of vascular smooth muscle contraction;GO:0003056 regulation of vascular smooth muscle contraction;GO:0045906 negative regulation of vasoconstriction			Plasma membrane(Supported)Cytosol;Golgi apparatus;Nucleoli(Approved)		(M186)PID PDGFRB PATHWAY	(M5893)HALLMARK MITOTIC SPINDLE; (M5921)HALLMARK COMPLEMENT	0.0	0.0	0.0	1.0	0.0	0.0	0.0	0.0	0.0	0.0	0.0	0.0	0.0	1.0	0.0	0.0	0.0	0.0	0.0	0.0
DOK2	9046	symbol	H. sapiens	9046	H. sapiens	DOK2	docking protein 2	GO:0007411 axon guidance;GO:0097485 neuron projection guidance;GO:0007409 axonogenesis					(M92)PID ANGIOPOIETIN RECEPTOR PATHWAY; (M122)PID IL2 1PATHWAY; (M28)PID IL4 2PATHWAY		0.0	0.0	0.0	1.0	0.0	0.0	0.0	1.0	0.0	0.0	0.0	0.0	0.0	1.0	0.0	0.0	0.0	0.0	0.0	0.0
DOK5	55816	symbol	H. sapiens	55816	H. sapiens	DOK5	docking protein 5	GO:0051386 regulation of neurotrophin TRK receptor signaling pathway;GO:0048011 neurotrophin TRK receptor signaling pathway;GO:0038179 neurotrophin signaling pathway			Focal adhesion sites(Approved)		(M82)PID RET PATHWAY		0.0	0.0	0.0	1.0	0.0	0.0	0.0	1.0	0.0	0.0	0.0	0.0	0.0	1.0	0.0	0.0	0.0	0.0	1.0	0.0
DOK6	220164	symbol	H. sapiens	220164	H. sapiens	DOK6	docking protein 6	GO:0007411 axon guidance;GO:0097485 neuron projection guidance;GO:0007409 axonogenesis			Cytosol;Focal adhesion sites(Approved)		(M82)PID RET PATHWAY		0.0	0.0	0.0	1.0	0.0	0.0	0.0	0.0	0.0	0.0	0.0	0.0	0.0	1.0	0.0	0.0	0.0	0.0	0.0	0.0
DPYSL2	1808	symbol	H. sapiens	1808	H. sapiens	DPYSL2	dihydropyrimidinase like 2	GO:0006208 pyrimidine nucleobase catabolic process;GO:0030516 regulation of axon extension;GO:0048675 axon extension			Cytosol(Supported)Plasma membrane(Approved)			(M5919)HALLMARK HEDGEHOG SIGNALING	0.0	0.0	0.0	1.0	0.0	0.0	0.0	0.0	0.0	0.0	0.0	0.0	0.0	1.0	0.0	0.0	0.0	0.0	0.0	0.0
DPYSL3	1809	symbol	H. sapiens	1809	H. sapiens	DPYSL3	dihydropyrimidinase like 3	GO:0006208 pyrimidine nucleobase catabolic process;GO:0051491 positive regulation of filopodium assembly;GO:0051764 actin crosslink formation			Cytosol(Supported)			(M5930)HALLMARK EPITHELIAL MESENCHYMAL TRANSITION	0.0	0.0	0.0	0.0	0.0	0.0	0.0	0.0	0.0	1.0	0.0	0.0	0.0	1.0	1.0	0.0	0.0	0.0	0.0	0.0
DRAM1	55332	symbol	H. sapiens	55332	H. sapiens	DRAM1	DNA damage regulated autophagy modulator 1	GO:0010506 regulation of autophagy;GO:0006914 autophagy;GO:0061919 process utilizing autophagic mechanism						(M5890)HALLMARK TNFA SIGNALING VIA NFKB; (M5939)HALLMARK P53 PATHWAY	0.0	0.0	0.0	0.0	0.0	0.0	0.0	0.0	0.0	0.0	0.0	0.0	0.0	0.0	0.0	0.0	0.0	0.0	0.0	0.0
DRP2	1821	symbol	H. sapiens	1821	H. sapiens	DRP2	dystrophin related protein 2	GO:0050808 synapse organization;GO:0007417 central nervous system development;GO:0007399 nervous system development			Nuclear speckles;Plasma membrane(Approved)				0.0	0.0	0.0	0.0	0.0	0.0	0.0	0.0	0.0	0.0	0.0	0.0	0.0	0.0	0.0	0.0	0.0	0.0	0.0	0.0
DSEL	92126	symbol	H. sapiens	92126	H. sapiens	DSEL	dermatan sulfate epimerase like	GO:0030208 dermatan sulfate biosynthetic process;GO:0030205 dermatan sulfate metabolic process;GO:0050651 dermatan sulfate proteoglycan biosynthetic process			Nucleoplasm;Plasma membrane(Approved)				0.0	0.0	0.0	0.0	0.0	0.0	0.0	0.0	0.0	0.0	0.0	0.0	0.0	0.0	0.0	0.0	0.0	0.0	0.0	0.0
DSE	29940	symbol	H. sapiens	29940	H. sapiens	DSE	dermatan sulfate epimerase	GO:0030208 dermatan sulfate biosynthetic process;GO:0030205 dermatan sulfate metabolic process;GO:0050651 dermatan sulfate proteoglycan biosynthetic process		Enzymes/ENZYME proteins/Isomerase	Cytosol;Nucleoplasm(Supported)				0.0	0.0	0.0	0.0	0.0	0.0	0.0	0.0	0.0	0.0	0.0	0.0	0.0	0.0	0.0	0.0	0.0	0.0	0.0	0.0
DYSF	8291	symbol	H. sapiens	8291	H. sapiens	DYSF	dysferlin	GO:1901842 negative regulation of high voltage-gated calcium channel activity;GO:1901386 negative regulation of voltage-gated calcium channel activity;GO:1901841 regulation of high voltage-gated calcium channel activity		Transporters/Transporter channels and pores	Plasma membrane(Supported)Microtubule organizing center(Approved)				0.0	1.0	0.0	1.0	0.0	0.0	1.0	0.0	0.0	1.0	0.0	0.0	0.0	0.0	0.0	0.0	1.0	0.0	0.0	0.0
EBF1	1879	symbol	H. sapiens	1879	H. sapiens	EBF1	EBF transcription factor 1	GO:0045944 positive regulation of transcription by RNA polymerase II;GO:0045893 positive regulation of transcription, DNA-templated;GO:1903508 positive regulation of nucleic acid-templated transcription		Transcription factors/Immunoglobulin fold	Nucleoplasm;Vesicles(Approved)				0.0	0.0	0.0	0.0	0.0	0.0	0.0	0.0	0.0	0.0	0.0	0.0	0.0	0.0	0.0	0.0	0.0	0.0	0.0	0.0
ECE1	1889	symbol	H. sapiens	1889	H. sapiens	ECE1	endothelin converting enzyme 1	GO:0034959 endothelin maturation;GO:0010814 substance P catabolic process;GO:0003100 regulation of systemic arterial blood pressure by endothelin		Enzymes/{ENZYME proteins/Hydrolases,Peptidases/Metallopeptidases}		5-(2-hydroxyethyl)nonane-1,9-diol (Protein homodimerization activity)			0.0	0.0	0.0	0.0	0.0	0.0	0.0	0.0	0.0	0.0	0.0	0.0	0.0	1.0	0.0	0.0	1.0	0.0	0.0	1.0
ECM2	1842	symbol	H. sapiens	1842	H. sapiens	ECM2	extracellular matrix protein 2	GO:0010811 positive regulation of cell-substrate adhesion;GO:0010810 regulation of cell-substrate adhesion;GO:0007160 cell-matrix adhesion					(M3008)NABA ECM GLYCOPROTEINS; (M5884)NABA CORE MATRISOME; (M5889)NABA MATRISOME	(M5930)HALLMARK EPITHELIAL MESENCHYMAL TRANSITION	1.0	0.0	0.0	0.0	0.0	0.0	1.0	0.0	0.0	0.0	0.0	0.0	0.0	0.0	0.0	0.0	0.0	0.0	0.0	0.0
EDA2R	60401	symbol	H. sapiens	60401	H. sapiens	EDA2R	ectodysplasin A2 receptor	GO:0010668 ectodermal cell differentiation;GO:0046330 positive regulation of JNK cascade;GO:0032874 positive regulation of stress-activated MAPK cascade			Cell Junctions(Approved)				0.0	0.0	0.0	0.0	0.0	0.0	0.0	0.0	0.0	0.0	0.0	0.0	0.0	0.0	0.0	0.0	0.0	0.0	0.0	0.0
EDIL3	10085	symbol	H. sapiens	10085	H. sapiens	EDIL3	EGF like repeats and discoidin domains 3	GO:0010811 positive regulation of cell-substrate adhesion;GO:0010810 regulation of cell-substrate adhesion;GO:0045785 positive regulation of cell adhesion					(M212)PID INTEGRIN5 PATHWAY; (M53)PID INTEGRIN3 PATHWAY; (M160)PID AVB3 INTEGRIN PATHWAY	(M5930)HALLMARK EPITHELIAL MESENCHYMAL TRANSITION	1.0	0.0	1.0	0.0	0.0	0.0	1.0	0.0	0.0	0.0	0.0	0.0	0.0	0.0	0.0	1.0	0.0	0.0	0.0	0.0
EDNRA	1909	symbol	H. sapiens	1909	H. sapiens	EDNRA	endothelin receptor type A	GO:0014824 artery smooth muscle contraction;GO:0007202 activation of phospholipase C activity;GO:0014829 vascular smooth muscle contraction		G-protein coupled receptors/GPCRs excl olfactory receptors		Bosentan (Phosphatidylinositol phospholipase c activity);Acetylsalicylic acid (Phosphatidylinositol phospholipase c activity);2-HYDROXY-3,5-DIIODOBENZOIC ACID (Phosphatidylinositol phospholipase c activity);Darusentan (Phosphatidylinositol phospholipase c activity);PS433540 (Phosphatidylinositol phospholipase c activity);SPP 301 (Phosphatidylinositol phospholipase c activity);Actelion-1 (Phosphat…	(M8)PID ENDOTHELIN PATHWAY		0.0	1.0	0.0	0.0	0.0	0.0	0.0	0.0	0.0	0.0	0.0	0.0	1.0	1.0	0.0	0.0	1.0	1.0	0.0	1.0
EFEMP2	30008	symbol	H. sapiens	30008	H. sapiens	EFEMP2	EGF containing fibulin extracellular matrix protein 2	GO:0048251 elastic fiber assembly;GO:0085029 extracellular matrix assembly;GO:0030198 extracellular matrix organization					(M3008)NABA ECM GLYCOPROTEINS; (M5884)NABA CORE MATRISOME; (M5889)NABA MATRISOME	(M5930)HALLMARK EPITHELIAL MESENCHYMAL TRANSITION	1.0	0.0	0.0	0.0	0.0	0.0	0.0	0.0	0.0	0.0	0.0	0.0	0.0	0.0	1.0	0.0	0.0	0.0	0.0	0.0
EGFL6	25975	symbol	H. sapiens	25975	H. sapiens	EGFL6	EGF like domain multiple 6	GO:0010811 positive regulation of cell-substrate adhesion;GO:0010810 regulation of cell-substrate adhesion;GO:0045785 positive regulation of cell adhesion					(M5883)NABA SECRETED FACTORS; (M5885)NABA MATRISOME ASSOCIATED; (M5889)NABA MATRISOME		1.0	0.0	0.0	0.0	1.0	0.0	1.0	0.0	0.0	0.0	0.0	0.0	0.0	0.0	0.0	0.0	0.0	0.0	0.0	0.0
EGFLAM	133584	symbol	H. sapiens	133584	H. sapiens	EGFLAM	EGF like, fibronectin type III and laminin G domains	GO:0019800 peptide cross-linking via chondroitin 4-sulfate glycosaminoglycan;GO:0030204 chondroitin sulfate metabolic process;GO:0050654 chondroitin sulfate proteoglycan metabolic process					(M3008)NABA ECM GLYCOPROTEINS; (M5884)NABA CORE MATRISOME; (M5889)NABA MATRISOME		1.0	0.0	0.0	0.0	0.0	0.0	1.0	0.0	0.0	0.0	0.0	0.0	0.0	1.0	0.0	0.0	0.0	0.0	0.0	0.0
EHD2	30846	symbol	H. sapiens	30846	H. sapiens	EHD2	EH domain containing 2	GO:2001137 positive regulation of endocytic recycling;GO:1901741 positive regulation of myoblast fusion;GO:1901739 regulation of myoblast fusion			Plasma membrane(Supported)				0.0	0.0	0.0	0.0	0.0	0.0	0.0	0.0	0.0	1.0	0.0	0.0	0.0	0.0	1.0	0.0	1.0	0.0	0.0	0.0
ELFN1	392617	symbol	H. sapiens	392617	H. sapiens	ELFN1	extracellular leucine rich repeat and fibronectin type III domain containing 1	GO:0032515 negative regulation of phosphoprotein phosphatase activity;GO:0035308 negative regulation of protein dephosphorylation;GO:0010923 negative regulation of phosphatase activity			Cell Junctions;Nucleoplasm(Approved)		(M5880)NABA ECM AFFILIATED; (M5885)NABA MATRISOME ASSOCIATED; (M5889)NABA MATRISOME		0.0	0.0	0.0	0.0	1.0	0.0	0.0	0.0	0.0	0.0	0.0	0.0	0.0	0.0	0.0	0.0	0.0	0.0	0.0	0.0
ELMOD1	55531	symbol	H. sapiens	55531	H. sapiens	ELMOD1	ELMO domain containing 1	GO:0043547 positive regulation of GTPase activity;GO:0043087 regulation of GTPase activity;GO:0051345 positive regulation of hydrolase activity			Cytosol(Supported)Nucleoplasm(Approved)				0.0	0.0	0.0	0.0	0.0	0.0	0.0	0.0	0.0	0.0	0.0	0.0	0.0	0.0	0.0	0.0	0.0	0.0	0.0	0.0
ELOVL2	54898	symbol	H. sapiens	54898	H. sapiens	ELOVL2	ELOVL fatty acid elongase 2	GO:0035338 long-chain fatty-acyl-CoA biosynthetic process;GO:0034626 fatty acid elongation, polyunsaturated fatty acid;GO:0034625 fatty acid elongation, monounsaturated fatty acid		Enzymes/ENZYME proteins/Transferases				(M5906)HALLMARK ESTROGEN RESPONSE EARLY	0.0	0.0	0.0	0.0	0.0	0.0	0.0	0.0	0.0	0.0	0.0	0.0	0.0	0.0	0.0	0.0	0.0	0.0	0.0	0.0
ELTD1	64123	gene_synonym	H. sapiens	64123	H. sapiens	ADGRL4	adhesion G protein-coupled receptor L4	GO:0007189 adenylate cyclase-activating G protein-coupled receptor signaling pathway;GO:0019933 cAMP-mediated signaling;GO:0007188 adenylate cyclase-modulating G protein-coupled receptor signaling pathway		G-protein coupled receptors/{Family 2 (B) receptors,GPCRs excl olfactory receptors};Transporters				(M5953)HALLMARK KRAS SIGNALING UP	0.0	0.0	0.0	0.0	0.0	0.0	0.0	0.0	0.0	0.0	0.0	0.0	0.0	0.0	0.0	0.0	0.0	0.0	0.0	0.0
EMILIN1	11117	symbol	H. sapiens	11117	H. sapiens	EMILIN1	elastin microfibril interfacer 1	GO:1904027 negative regulation of collagen fibril organization;GO:1905522 negative regulation of macrophage migration;GO:1901203 positive regulation of extracellular matrix assembly					(M3008)NABA ECM GLYCOPROTEINS; (M5884)NABA CORE MATRISOME; (M5889)NABA MATRISOME		1.0	1.0	0.0	1.0	1.0	0.0	1.0	1.0	0.0	0.0	1.0	0.0	0.0	0.0	1.0	0.0	1.0	0.0	1.0	0.0
EMILIN2	84034	symbol	H. sapiens	84034	H. sapiens	EMILIN2	elastin microfibril interfacer 2	GO:0010811 positive regulation of cell-substrate adhesion;GO:0010810 regulation of cell-substrate adhesion;GO:0045785 positive regulation of cell adhesion					(M3008)NABA ECM GLYCOPROTEINS; (M5884)NABA CORE MATRISOME; (M5889)NABA MATRISOME		1.0	0.0	0.0	0.0	0.0	0.0	1.0	0.0	0.0	0.0	0.0	0.0	0.0	0.0	0.0	0.0	0.0	0.0	0.0	0.0
EML1	2009	symbol	H. sapiens	2009	H. sapiens	EML1	EMAP like 1	GO:0007405 neuroblast proliferation;GO:0007052 mitotic spindle organization;GO:0002244 hematopoietic progenitor cell differentiation							0.0	0.0	0.0	0.0	0.0	0.0	0.0	0.0	0.0	0.0	0.0	0.0	0.0	0.0	0.0	0.0	0.0	0.0	0.0	0.0
EMP3	2014	symbol	H. sapiens	2014	H. sapiens	EMP3	epithelial membrane protein 3	GO:0032060 bleb assembly;GO:0120031 plasma membrane bounded cell projection assembly;GO:0030031 cell projection assembly						(M5930)HALLMARK EPITHELIAL MESENCHYMAL TRANSITION; (M5932)HALLMARK INFLAMMATORY RESPONSE	0.0	0.0	0.0	0.0	0.0	0.0	0.0	0.0	0.0	0.0	0.0	0.0	0.0	0.0	0.0	0.0	0.0	0.0	0.0	0.0
EMR1	2015	gene_synonym	H. sapiens	2015	H. sapiens	ADGRE1	adhesion G protein-coupled receptor E1	GO:0007189 adenylate cyclase-activating G protein-coupled receptor signaling pathway;GO:0019933 cAMP-mediated signaling;GO:0007188 adenylate cyclase-modulating G protein-coupled receptor signaling pathway		G-protein coupled receptors/{Family 2 (B) receptors,GPCRs excl olfactory receptors};Transporters				(M5932)HALLMARK INFLAMMATORY RESPONSE	0.0	0.0	0.0	0.0	0.0	0.0	0.0	0.0	0.0	0.0	0.0	0.0	0.0	0.0	0.0	0.0	0.0	0.0	0.0	0.0
EMR2	30817	gene_synonym	H. sapiens	30817	H. sapiens	ADGRE2	adhesion G protein-coupled receptor E2	GO:0043304 regulation of mast cell degranulation;GO:0033006 regulation of mast cell activation involved in immune response;GO:0043303 mast cell degranulation		CD markers;G-protein coupled receptors/{Family 2 (B) receptors,GPCRs excl olfactory receptors}	Vesicles(Approved)				0.0	0.0	0.0	1.0	0.0	0.0	0.0	0.0	0.0	0.0	0.0	0.0	0.0	0.0	0.0	0.0	0.0	0.0	0.0	0.0
ENG	2022	symbol	H. sapiens	2022	H. sapiens	ENG	endoglin	GO:1905310 regulation of cardiac neural crest cell migration involved in outflow tract morphogenesis;GO:1905007 positive regulation of epithelial to mesenchymal transition involved in endocardial cushion formation;GO:0003253 cardiac neural crest cell migration involved in outflow tract morphogenesis		CD markers			(M185)PID ALK1 PATHWAY; (M255)PID HIF1 TFPATHWAY	(M5896)HALLMARK TGF BETA SIGNALING; (M5953)HALLMARK KRAS SIGNALING UP	1.0	1.0	0.0	0.0	1.0	0.0	0.0	1.0	1.0	0.0	0.0	0.0	1.0	0.0	0.0	0.0	1.0	1.0	1.0	1.0
ENOX1	55068	symbol	H. sapiens	55068	H. sapiens	ENOX1	ecto-NOX disulfide-thiol exchanger 1	GO:0007624 ultradian rhythm;GO:0048511 rhythmic process;GO:0055114 oxidation-reduction process			Plasma membrane(Supported)				0.0	0.0	0.0	0.0	0.0	0.0	0.0	0.0	0.0	0.0	0.0	0.0	0.0	0.0	0.0	0.0	0.0	0.0	0.0	0.0
ENPEP	2028	symbol	H. sapiens	2028	H. sapiens	ENPEP	glutamyl aminopeptidase	GO:0002003 angiotensin maturation;GO:0002002 regulation of angiotensin levels in blood;GO:0001991 regulation of systemic arterial blood pressure by circulatory renin-angiotensin		CD markers;Enzymes/{ENZYME proteins/Hydrolases,Peptidases/Metallopeptidases}	Endoplasmic reticulum(Approved)	L-Glutamic Acid (Zinc ion binding)		(M5934)HALLMARK XENOBIOTIC METABOLISM	0.0	1.0	0.0	0.0	0.0	0.0	0.0	0.0	0.0	0.0	0.0	0.0	0.0	0.0	0.0	0.0	0.0	0.0	0.0	0.0
ENTPD1	953	symbol	H. sapiens	953	H. sapiens	ENTPD1	ectonucleoside triphosphate diphosphohydrolase 1	GO:0034656 nucleobase-containing small molecule catabolic process;GO:0007596 blood coagulation;GO:0007599 hemostasis		CD markers;Enzymes/ENZYME proteins/Hydrolases	Microtubules(Uncertain)				0.0	0.0	0.0	0.0	0.0	0.0	0.0	0.0	0.0	1.0	0.0	0.0	0.0	0.0	0.0	0.0	0.0	0.0	0.0	0.0
EPOR	2057	symbol	H. sapiens	2057	H. sapiens	EPOR	erythropoietin receptor	GO:0038162 erythropoietin-mediated signaling pathway;GO:0036018 cellular response to erythropoietin;GO:0046697 decidualization			Vesicles(Supported)	Darbepoetin alfa (Identical protein binding);Erythropoietin (Identical protein binding);3,5 DIBROMOTYROSINE (Identical protein binding);Peginesatide (Identical protein binding);Epoetin Zeta (Identical protein binding)	(M233)PID EPO PATHWAY; (M231)PID KIT PATHWAY	(M5945)HALLMARK HEME METABOLISM	0.0	0.0	0.0	0.0	0.0	1.0	0.0	0.0	0.0	0.0	0.0	0.0	0.0	0.0	0.0	0.0	1.0	0.0	0.0	0.0
EPYC	1833	symbol	H. sapiens	1833	H. sapiens	EPYC	epiphycan	GO:0007565 female pregnancy;GO:0044706 multi-multicellular organism process;GO:0044703 multi-organism reproductive process					(M5882)NABA PROTEOGLYCANS; (M5884)NABA CORE MATRISOME; (M5889)NABA MATRISOME		1.0	0.0	0.0	0.0	0.0	0.0	0.0	0.0	0.0	0.0	0.0	0.0	0.0	0.0	0.0	0.0	0.0	0.0	0.0	0.0
ERG	2078	symbol	H. sapiens	2078	H. sapiens	ERG	ETS transcription factor ERG	GO:0045944 positive regulation of transcription by RNA polymerase II;GO:0045893 positive regulation of transcription, DNA-templated;GO:1903508 positive regulation of nucleic acid-templated transcription		Transcription factors/Helix-turn-helix domains	Cytosol;Nucleoplasm(Approved)				0.0	0.0	0.0	0.0	0.0	0.0	0.0	0.0	0.0	0.0	0.0	0.0	0.0	0.0	0.0	0.0	0.0	0.0	0.0	0.0
ERMN	57471	symbol	H. sapiens	57471	H. sapiens	ERMN	ermin	GO:0008360 regulation of cell shape;GO:0001763 morphogenesis of a branching structure;GO:0007015 actin filament organization							0.0	0.0	0.0	0.0	0.0	0.0	0.0	0.0	0.0	0.0	0.0	0.0	1.0	1.0	1.0	0.0	0.0	0.0	0.0	0.0
ESM1	11082	symbol	H. sapiens	11082	H. sapiens	ESM1	endothelial cell specific molecule 1	GO:1902204 positive regulation of hepatocyte growth factor receptor signaling pathway;GO:1902202 regulation of hepatocyte growth factor receptor signaling pathway;GO:0048012 hepatocyte growth factor receptor signaling pathway					(M5882)NABA PROTEOGLYCANS; (M5884)NABA CORE MATRISOME; (M5889)NABA MATRISOME		1.0	1.0	0.0	0.0	0.0	0.0	0.0	1.0	0.0	0.0	0.0	0.0	0.0	0.0	0.0	0.0	0.0	0.0	0.0	0.0
ETS1	2113	symbol	H. sapiens	2113	H. sapiens	ETS1	ETS proto-oncogene 1, transcription factor	GO:1904996 positive regulation of leukocyte adhesion to vascular endothelial cell;GO:0045648 positive regulation of erythrocyte differentiation;GO:0060055 angiogenesis involved in wound healing		RAS pathway related proteins;Transcription factors/Helix-turn-helix domains	Nucleoplasm(Enhanced)		(M44)PID HIF2PATHWAY; (M92)PID ANGIOPOIETIN RECEPTOR PATHWAY; (M281)PID FAK PATHWAY	(M5950)HALLMARK ALLOGRAFT REJECTION; (M5953)HALLMARK KRAS SIGNALING UP; (M5891)HALLMARK HYPOXIA	1.0	1.0	0.0	1.0	1.0	0.0	1.0	0.0	0.0	1.0	0.0	0.0	0.0	0.0	0.0	0.0	0.0	0.0	0.0	0.0
EVC	2121	symbol	H. sapiens	2121	H. sapiens	EVC	EvC ciliary complex subunit 1	GO:0003416 endochondral bone growth;GO:0045880 positive regulation of smoothened signaling pathway;GO:0098868 bone growth			Cytosol;Nucleoplasm(Approved)				0.0	0.0	0.0	0.0	0.0	0.0	0.0	0.0	1.0	0.0	0.0	0.0	0.0	0.0	0.0	0.0	1.0	0.0	0.0	0.0
EVI2A	2123	symbol	H. sapiens	2123	H. sapiens	EVI2A	ecotropic viral integration site 2A				Nuclear bodies;Nucleoplasm(Approved)				0.0	0.0	0.0	0.0	0.0	0.0	0.0	0.0	0.0	0.0	0.0	0.0	0.0	0.0	0.0	0.0	0.0	0.0	0.0	0.0
EXOC3L	283849	gene_synonym	H. sapiens	283849	H. sapiens	EXOC3L1	exocyst complex component 3 like 1	GO:0051601 exocyst localization;GO:0034629 cellular protein-containing complex localization;GO:0030072 peptide hormone secretion			Plasma membrane;Vesicles(Approved)				0.0	0.0	0.0	0.0	0.0	0.0	0.0	0.0	0.0	0.0	0.0	0.0	0.0	0.0	0.0	0.0	0.0	0.0	0.0	0.0
EXT1	2131	symbol	H. sapiens	2131	H. sapiens	EXT1	exostosin glycosyltransferase 1	GO:0015014 heparan sulfate proteoglycan biosynthetic process, polysaccharide chain biosynthetic process;GO:0021772 olfactory bulb development;GO:0072498 embryonic skeletal joint development		Enzymes/ENZYME proteins/Transferases				(M5937)HALLMARK GLYCOLYSIS; (M5891)HALLMARK HYPOXIA	0.0	0.0	0.0	1.0	0.0	0.0	0.0	0.0	1.0	0.0	0.0	1.0	0.0	1.0	0.0	0.0	0.0	0.0	0.0	1.0
EXTL2	2135	symbol	H. sapiens	2135	H. sapiens	EXTL2	exostosin like glycosyltransferase 2	GO:0019276 UDP-N-acetylgalactosamine metabolic process;GO:0006044 N-acetylglucosamine metabolic process;GO:0036498 IRE1-mediated unfolded protein response		Enzymes/ENZYME proteins/Transferases	Cytosol;Nucleus(Approved)	Uridine-Diphosphate-N-Acetylgalactosamine (Metal ion binding);Uridine-Diphosphate-N-Acetylglucosamine (Metal ion binding);Uridine-5'-Diphosphate (Metal ion binding)			0.0	0.0	0.0	0.0	0.0	0.0	0.0	0.0	0.0	0.0	0.0	0.0	0.0	0.0	0.0	0.0	0.0	0.0	0.0	0.0
F13A1	2162	symbol	H. sapiens	2162	H. sapiens	F13A1	coagulation factor XIII A chain	GO:0072378 blood coagulation, fibrin clot formation;GO:0002576 platelet degranulation;GO:0018149 peptide cross-linking		Enzymes/ENZYME proteins/Transferases		1,2-Propanediol (Protein-glutamine gamma-glutamyltransferase activity);N-Acetyl-Serine (Protein-glutamine gamma-glutamyltransferase activity)	(M118)PID INTEGRIN A9B1 PATHWAY; (M18)PID INTEGRIN1 PATHWAY; (M3468)NABA ECM REGULATORS	(M5953)HALLMARK KRAS SIGNALING UP	0.0	0.0	0.0	0.0	1.0	1.0	0.0	0.0	0.0	1.0	0.0	0.0	0.0	0.0	0.0	0.0	0.0	0.0	0.0	0.0
F2RL2	2151	symbol	H. sapiens	2151	H. sapiens	F2RL2	coagulation factor II thrombin receptor like 2	GO:0051482 positive regulation of cytosolic calcium ion concentration involved in phospholipase C-activating G protein-coupled signaling pathway;GO:0035025 positive regulation of Rho protein signal transduction;GO:0070493 thrombin-activated receptor signaling pathway		G-protein coupled receptors/GPCRs excl olfactory receptors			(M138)PID THROMBIN PAR4 PATHWAY; (M15743)ST GA12 PATHWAY; (M193)PID NEPHRIN NEPH1 PATHWAY	(M5946)HALLMARK COAGULATION; (M5947)HALLMARK IL2 STAT5 SIGNALING	0.0	0.0	0.0	0.0	0.0	0.0	0.0	0.0	0.0	1.0	0.0	0.0	0.0	0.0	0.0	0.0	0.0	0.0	0.0	0.0
F2R	2149	symbol	H. sapiens	2149	H. sapiens	F2R	coagulation factor II thrombin receptor	GO:1900134 negative regulation of renin secretion into blood stream;GO:1900133 regulation of renin secretion into blood stream;GO:0002001 renin secretion into blood stream		G-protein coupled receptors/GPCRs excl olfactory receptors		Streptokinase (Thrombin receptor activity);SR-123781A (Thrombin receptor activity);SCH-530348 (Thrombin receptor activity);Vorapaxar (Thrombin receptor activity)	(M238)PID THROMBIN PAR1 PATHWAY	(M5902)HALLMARK APOPTOSIS; (M5950)HALLMARK ALLOGRAFT REJECTION; (M5939)HALLMARK P53 PATHWAY	0.0	0.0	0.0	1.0	1.0	1.0	0.0	0.0	0.0	1.0	0.0	0.0	0.0	1.0	0.0	0.0	0.0	0.0	0.0	0.0
FADS2	9415	symbol	H. sapiens	9415	H. sapiens	FADS2	fatty acid desaturase 2	GO:0036109 alpha-linolenic acid metabolic process;GO:0043651 linoleic acid metabolic process;GO:0006636 unsaturated fatty acid biosynthetic process		Enzymes/ENZYME proteins/Oxidoreductases		Alpha-Linolenic Acid (Stearoyl-coa 9-desaturase activity)		(M5892)HALLMARK CHOLESTEROL HOMEOSTASIS; (M5948)HALLMARK BILE ACID METABOLISM; (M5924)HALLMARK MTORC1 SIGNALING	0.0	0.0	0.0	0.0	0.0	0.0	0.0	0.0	0.0	0.0	0.0	0.0	0.0	0.0	0.0	0.0	0.0	0.0	0.0	0.0
FADS3	3995	symbol	H. sapiens	3995	H. sapiens	FADS3	fatty acid desaturase 3	GO:0006636 unsaturated fatty acid biosynthetic process;GO:0033559 unsaturated fatty acid metabolic process;GO:0006633 fatty acid biosynthetic process			Nucleoli fibrillar center(Approved)				0.0	0.0	0.0	0.0	0.0	0.0	0.0	0.0	0.0	0.0	0.0	0.0	0.0	0.0	0.0	0.0	0.0	0.0	0.0	0.0
FAM101B	359845	gene_synonym	H. sapiens	359845	H. sapiens	RFLNB	refilin B	GO:1900158 negative regulation of bone mineralization involved in bone maturation;GO:1900157 regulation of bone mineralization involved in bone maturation;GO:0061182 negative regulation of chondrocyte development			Actin filaments(Supported)Cytosol;Plasma membrane(Approved)				0.0	0.0	0.0	0.0	0.0	0.0	0.0	0.0	1.0	0.0	0.0	1.0	0.0	0.0	1.0	0.0	0.0	1.0	0.0	0.0
FAM167B	84734	symbol	H. sapiens	84734	H. sapiens	FAM167B	family with sequence similarity 167 member B				Actin filaments(Approved)				0.0	0.0	0.0	0.0	0.0	0.0	0.0	0.0	0.0	0.0	0.0	0.0	0.0	0.0	0.0	0.0	0.0	0.0	0.0	0.0
FAM176A	84141	gene_synonym	H. sapiens	84141	H. sapiens	EVA1A	eva-1 homolog A, regulator of programmed cell death	GO:0043687 post-translational protein modification;GO:0006914 autophagy;GO:0061919 process utilizing autophagic mechanism			Vesicles(Supported)Plasma membrane(Approved)				0.0	0.0	0.0	0.0	0.0	0.0	0.0	0.0	0.0	0.0	0.0	0.0	0.0	0.0	0.0	0.0	0.0	0.0	0.0	0.0
FAM176B	55194	gene_synonym	H. sapiens	55194	H. sapiens	EVA1B	eva-1 homolog B				Cytosol(Approved)				0.0	0.0	0.0	0.0	0.0	0.0	0.0	0.0	0.0	0.0	0.0	0.0	0.0	0.0	0.0	0.0	0.0	0.0	0.0	0.0
FAM196B	100131897	gene_synonym	H. sapiens	100131897	H. sapiens	INSYN2B	inhibitory synaptic factor family member 2B								0.0	0.0	0.0	0.0	0.0	0.0	0.0	0.0	0.0	0.0	0.0	0.0	0.0	0.0	0.0	0.0	0.0	0.0	0.0	0.0
FAM198B	51313	gene_synonym	H. sapiens	51313	H. sapiens	GASK1B	golgi associated kinase 1B				Golgi apparatus;Nucleoli fibrillar center;Nucleoplasm(Approved)				0.0	0.0	0.0	0.0	0.0	0.0	0.0	0.0	0.0	0.0	0.0	0.0	0.0	0.0	0.0	0.0	0.0	0.0	0.0	0.0
FAM19A5	25817	gene_synonym	H. sapiens	25817	H. sapiens	TAFA5	TAFA chemokine like family member 5	GO:0007165 signal transduction;GO:0023052 signaling;GO:0007154 cell communication							0.0	0.0	0.0	0.0	0.0	0.0	0.0	0.0	0.0	0.0	0.0	0.0	0.0	0.0	0.0	0.0	0.0	0.0	0.0	0.0
FAM20A	54757	symbol	H. sapiens	54757	H. sapiens	FAM20A	FAM20A golgi associated secretory pathway pseudokinase	GO:0070166 enamel mineralization;GO:0044691 tooth eruption;GO:0097186 amelogenesis					(M3468)NABA ECM REGULATORS; (M5885)NABA MATRISOME ASSOCIATED; (M5889)NABA MATRISOME		0.0	0.0	0.0	0.0	1.0	0.0	0.0	0.0	0.0	0.0	0.0	1.0	0.0	0.0	0.0	0.0	0.0	0.0	0.0	0.0
FAM20C	56975	symbol	H. sapiens	56975	H. sapiens	FAM20C	FAM20C golgi associated secretory pathway kinase	GO:0036179 osteoclast maturation;GO:0071895 odontoblast differentiation;GO:0036035 osteoclast development		Enzymes/ENZYME proteins/Transferases	Cytosol;Golgi apparatus;Nucleoplasm(Approved)		(M3468)NABA ECM REGULATORS; (M5885)NABA MATRISOME ASSOCIATED; (M5889)NABA MATRISOME		0.0	0.0	0.0	0.0	1.0	0.0	0.0	1.0	1.0	0.0	0.0	1.0	0.0	0.0	0.0	0.0	0.0	0.0	1.0	0.0
FAM26E	254228	gene_synonym	H. sapiens	254228	H. sapiens	CALHM5	calcium homeostasis modulator family member 5	GO:0006811 ion transport;GO:0006810 transport;GO:0051234 establishment of localization			Golgi apparatus(Approved)				0.0	0.0	0.0	0.0	0.0	0.0	0.0	0.0	0.0	0.0	0.0	0.0	0.0	0.0	0.0	0.0	0.0	0.0	0.0	0.0
FAM38B	63895	gene_synonym	H. sapiens	63895	H. sapiens	PIEZO2	piezo type mechanosensitive ion channel component 2	GO:0050974 detection of mechanical stimulus involved in sensory perception;GO:0050982 detection of mechanical stimulus;GO:0071260 cellular response to mechanical stimulus		Transporters/Transporter channels and pores	Vesicles(Approved)				0.0	0.0	0.0	0.0	0.0	0.0	0.0	0.0	0.0	0.0	0.0	0.0	0.0	0.0	0.0	0.0	0.0	0.0	0.0	0.0
FAM65A	79567	gene_synonym	H. sapiens	79567	H. sapiens	RIPOR1	RHO family interacting cell polarization regulator 1	GO:0051683 establishment of Golgi localization;GO:0051645 Golgi localization;GO:0034067 protein localization to Golgi apparatus			Cytosol;Golgi apparatus(Approved)				0.0	0.0	0.0	1.0	0.0	0.0	0.0	0.0	0.0	1.0	0.0	0.0	0.0	0.0	0.0	0.0	0.0	0.0	0.0	0.0
FAM65C	140876	gene_synonym	H. sapiens	140876	H. sapiens	RIPOR3	RIPOR family member 3				Nucleoplasm(Approved)				0.0	0.0	0.0	0.0	0.0	0.0	0.0	0.0	0.0	0.0	0.0	0.0	0.0	0.0	0.0	0.0	0.0	0.0	0.0	0.0
FAM70B	348013	gene_synonym	H. sapiens	348013	H. sapiens	TMEM255B	transmembrane protein 255B			Transporters	Nucleoplasm(Approved)				0.0	0.0	0.0	0.0	0.0	0.0	0.0	0.0	0.0	0.0	0.0	0.0	0.0	0.0	0.0	0.0	0.0	0.0	0.0	0.0
FAM92A1	137392	gene_synonym	H. sapiens	137392	H. sapiens	FAM92A	family with sequence similarity 92 member A	GO:0035108 limb morphogenesis;GO:0060173 limb development;GO:0035107 appendage morphogenesis			Mitochondria(Approved)				0.0	0.0	0.0	0.0	0.0	0.0	0.0	0.0	0.0	0.0	0.0	0.0	0.0	0.0	0.0	0.0	0.0	0.0	0.0	0.0
FAP	2191	symbol	H. sapiens	2191	H. sapiens	FAP	fibroblast activation protein alpha	GO:0051917 regulation of fibrinolysis;GO:0010716 negative regulation of extracellular matrix disassembly;GO:1902362 melanocyte apoptotic process		Enzymes/{ENZYME proteins/Hydrolases,Peptidases/Serine-type peptidases}				(M5930)HALLMARK EPITHELIAL MESENCHYMAL TRANSITION	1.0	1.0	0.0	0.0	1.0	0.0	0.0	0.0	0.0	1.0	0.0	0.0	0.0	0.0	0.0	0.0	0.0	0.0	0.0	0.0
FAT4	79633	symbol	H. sapiens	79633	H. sapiens	FAT4	FAT atypical cadherin 4	GO:0072307 regulation of metanephric nephron tubule epithelial cell differentiation;GO:0072257 metanephric nephron tubule epithelial cell differentiation;GO:0001658 branching involved in ureteric bud morphogenesis			Cytosol(Approved)				0.0	0.0	0.0	0.0	0.0	0.0	0.0	1.0	1.0	0.0	0.0	1.0	1.0	0.0	0.0	0.0	1.0	0.0	0.0	0.0
FBLN2	2199	symbol	H. sapiens	2199	H. sapiens	FBLN2	fibulin 2	GO:0010811 positive regulation of cell-substrate adhesion;GO:0010810 regulation of cell-substrate adhesion;GO:0045785 positive regulation of cell adhesion			Plasma membrane(Supported)		(M3008)NABA ECM GLYCOPROTEINS; (M5884)NABA CORE MATRISOME; (M5889)NABA MATRISOME	(M5930)HALLMARK EPITHELIAL MESENCHYMAL TRANSITION	1.0	0.0	0.0	0.0	0.0	0.0	1.0	0.0	0.0	0.0	0.0	0.0	0.0	0.0	0.0	0.0	0.0	0.0	0.0	0.0
FBLN5	10516	symbol	H. sapiens	10516	H. sapiens	FBLN5	fibulin 5	GO:2000121 regulation of removal of superoxide radicals;GO:0019430 removal of superoxide radicals;GO:0048251 elastic fiber assembly			Plasma membrane(Supported)		(M3008)NABA ECM GLYCOPROTEINS; (M5884)NABA CORE MATRISOME; (M5889)NABA MATRISOME	(M5942)HALLMARK UV RESPONSE DN; (M5930)HALLMARK EPITHELIAL MESENCHYMAL TRANSITION	1.0	0.0	0.0	0.0	0.0	0.0	1.0	0.0	0.0	0.0	0.0	0.0	0.0	1.0	1.0	0.0	0.0	0.0	0.0	0.0
FBLN7	129804	symbol	H. sapiens	129804	H. sapiens	FBLN7	fibulin 7	GO:0007155 cell adhesion;GO:0022610 biological adhesion;GO:0008150 biological_process			Cell Junctions;Plasma membrane(Approved)		(M3008)NABA ECM GLYCOPROTEINS; (M5884)NABA CORE MATRISOME; (M5889)NABA MATRISOME		1.0	0.0	0.0	0.0	0.0	0.0	0.0	0.0	0.0	0.0	0.0	0.0	0.0	0.0	0.0	0.0	0.0	0.0	0.0	0.0
FBN1	2200	symbol	H. sapiens	2200	H. sapiens	FBN1	fibrillin 1	GO:2001205 negative regulation of osteoclast development;GO:0035582 sequestering of BMP in extracellular matrix;GO:0035583 sequestering of TGFbeta in extracellular matrix			Cytosol(Approved)		(M212)PID INTEGRIN5 PATHWAY; (M53)PID INTEGRIN3 PATHWAY; (M18)PID INTEGRIN1 PATHWAY	(M5946)HALLMARK COAGULATION; (M5930)HALLMARK EPITHELIAL MESENCHYMAL TRANSITION; (M5915)HALLMARK APICAL JUNCTION	1.0	0.0	1.0	0.0	0.0	1.0	0.0	1.0	1.0	0.0	0.0	0.0	0.0	0.0	0.0	1.0	1.0	0.0	1.0	1.0
FBXL7	23194	symbol	H. sapiens	23194	H. sapiens	FBXL7	F-box and leucine rich repeat protein 7	GO:0010265 SCF complex assembly;GO:0031146 SCF-dependent proteasomal ubiquitin-dependent protein catabolic process;GO:0010972 negative regulation of G2/M transition of mitotic cell cycle							0.0	0.0	0.0	0.0	0.0	0.0	0.0	0.0	0.0	0.0	0.0	0.0	0.0	0.0	0.0	0.0	0.0	0.0	0.0	0.0
FCAR	2204	symbol	H. sapiens	2204	H. sapiens	FCAR	Fc fragment of IgA receptor	GO:0043312 neutrophil degranulation;GO:0002283 neutrophil activation involved in immune response;GO:0042119 neutrophil activation		CD markers	Plasma membrane(Supported)				0.0	0.0	0.0	0.0	0.0	0.0	0.0	0.0	0.0	0.0	0.0	0.0	0.0	0.0	0.0	0.0	0.0	0.0	0.0	0.0
FCER1G	2207	symbol	H. sapiens	2207	H. sapiens	FCER1G	Fc fragment of IgE receptor Ig	GO:0001798 positive regulation of type IIa hypersensitivity;GO:0001805 positive regulation of type III hypersensitivity;GO:0001812 positive regulation of type I hypersensitivity				Benzylpenicilloyl Polylysine (Igg binding)	(M7)PID FCER1 PATHWAY	(M5921)HALLMARK COMPLEMENT; (M5953)HALLMARK KRAS SIGNALING UP	0.0	0.0	0.0	1.0	0.0	0.0	0.0	0.0	0.0	1.0	0.0	0.0	0.0	0.0	0.0	0.0	0.0	0.0	0.0	0.0
FCGR1A	2209	symbol	H. sapiens	2209	H. sapiens	FCGR1A	Fc fragment of IgG receptor Ia	GO:0002479 antigen processing and presentation of exogenous peptide antigen via MHC class I, TAP-dependent;GO:0038096 Fc-gamma receptor signaling pathway involved in phagocytosis;GO:0061098 positive regulation of protein tyrosine kinase activity		CD markers		Cetuximab (Receptor signaling protein activity);Etanercept (Receptor signaling protein activity);Immune Globulin Human (Receptor signaling protein activity);Adalimumab (Receptor signaling protein activity);Abciximab (Receptor signaling protein activity);Gemtuzumab ozogamicin (Receptor signaling protein activity);Trastuzumab (Receptor signaling protein activity);Rituximab (Receptor signaling prote…		(M5913)HALLMARK INTERFERON GAMMA RESPONSE	0.0	0.0	0.0	0.0	0.0	0.0	0.0	0.0	0.0	0.0	0.0	0.0	0.0	0.0	0.0	0.0	0.0	0.0	0.0	0.0
FCGR1B	2210	symbol	H. sapiens	2210	H. sapiens	FCGR1B	Fc fragment of IgG receptor Ib	GO:0002479 antigen processing and presentation of exogenous peptide antigen via MHC class I, TAP-dependent;GO:0042590 antigen processing and presentation of exogenous peptide antigen via MHC class I;GO:0060333 interferon-gamma-mediated signaling pathway				Immune Globulin Human (Immunoglobulin receptor activity)			0.0	0.0	0.0	0.0	0.0	0.0	0.0	0.0	0.0	0.0	0.0	0.0	0.0	0.0	0.0	0.0	0.0	0.0	0.0	0.0
FCGR1C	100132417	gene_synonym	H. sapiens	100132417	H. sapiens	FCGR1CP	Fc fragment of IgG receptor Ic, pseudogene								0.0	0.0	0.0	0.0	0.0	0.0	0.0	0.0	0.0	0.0	0.0	0.0	0.0	0.0	0.0	0.0	0.0	0.0	0.0	0.0
FCGR2A	2212	symbol	H. sapiens	2212	H. sapiens	FCGR2A	Fc fragment of IgG receptor IIa	GO:0038096 Fc-gamma receptor signaling pathway involved in phagocytosis;GO:0002431 Fc receptor mediated stimulatory signaling pathway;GO:0038094 Fc-gamma receptor signaling pathway		CD markers		Cetuximab;Etanercept;Immune Globulin Human;Adalimumab;Abciximab;Gemtuzumab ozogamicin;Trastuzumab;Rituximab;Basiliximab;Muromonab;Ibritumomab tiuxetan;Tositumomab;Alemtuzumab;Alefacept;Efalizumab;Natalizumab;Palivizumab;Daclizumab;Bevacizumab	(M169)PID INTEGRIN2 PATHWAY; (M50)PID PTP1B PATHWAY		0.0	0.0	0.0	0.0	0.0	0.0	0.0	0.0	0.0	0.0	0.0	0.0	0.0	0.0	0.0	0.0	0.0	0.0	0.0	0.0
FCGR2B	2213	symbol	H. sapiens	2213	H. sapiens	FCGR2B	Fc fragment of IgG receptor IIb	GO:0001814 negative regulation of antibody-dependent cellular cytotoxicity;GO:0001797 negative regulation of type IIa hypersensitivity;GO:0002893 negative regulation of type II hypersensitivity		CD markers		Cetuximab;Etanercept;Immune Globulin Human;Adalimumab;Abciximab;Gemtuzumab ozogamicin;Trastuzumab;Rituximab;Basiliximab;Muromonab;Ibritumomab tiuxetan;Tositumomab;Alemtuzumab;Alefacept;Efalizumab;Anti-thymocyte Globulin (Rabbit);Natalizumab;Palivizumab;Daclizumab;Bevacizumab	(M7)PID FCER1 PATHWAY; (M10)PID BCR 5PATHWAY	(M5950)HALLMARK ALLOGRAFT REJECTION	0.0	0.0	0.0	0.0	0.0	0.0	1.0	0.0	0.0	0.0	0.0	0.0	0.0	1.0	0.0	0.0	0.0	0.0	0.0	0.0
FCGR2C	2213	gene_synonym	H. sapiens	2213	H. sapiens	FCGR2B	Fc fragment of IgG receptor IIb	GO:0001814 negative regulation of antibody-dependent cellular cytotoxicity;GO:0001797 negative regulation of type IIa hypersensitivity;GO:0002893 negative regulation of type II hypersensitivity		CD markers		Cetuximab;Etanercept;Immune Globulin Human;Adalimumab;Abciximab;Gemtuzumab ozogamicin;Trastuzumab;Rituximab;Basiliximab;Muromonab;Ibritumomab tiuxetan;Tositumomab;Alemtuzumab;Alefacept;Efalizumab;Anti-thymocyte Globulin (Rabbit);Natalizumab;Palivizumab;Daclizumab;Bevacizumab	(M7)PID FCER1 PATHWAY; (M10)PID BCR 5PATHWAY	(M5950)HALLMARK ALLOGRAFT REJECTION	0.0	0.0	0.0	0.0	0.0	0.0	1.0	0.0	0.0	0.0	0.0	0.0	0.0	1.0	0.0	0.0	0.0	0.0	0.0	0.0
FCGR3A	2214	symbol	H. sapiens	2214	H. sapiens	FCGR3A	Fc fragment of IgG receptor IIIa	GO:0038096 Fc-gamma receptor signaling pathway involved in phagocytosis;GO:0002431 Fc receptor mediated stimulatory signaling pathway;GO:0038094 Fc-gamma receptor signaling pathway		CD markers		Cetuximab;Etanercept;Immune Globulin Human;Adalimumab;Abciximab;Gemtuzumab ozogamicin;Trastuzumab;Rituximab;Basiliximab;Muromonab;Ibritumomab tiuxetan;Tositumomab;Alemtuzumab;Alefacept;Efalizumab;Natalizumab;Palivizumab;Daclizumab;Bevacizumab	(M11736)SA MMP CYTOKINE CONNECTION		0.0	0.0	0.0	0.0	0.0	0.0	0.0	0.0	0.0	0.0	0.0	0.0	0.0	0.0	0.0	0.0	0.0	0.0	0.0	0.0
FCHSD2	9873	symbol	H. sapiens	9873	H. sapiens	FCHSD2	FCH and double SH3 domains 2	GO:2000601 positive regulation of Arp2/3 complex-mediated actin nucleation;GO:0051127 positive regulation of actin nucleation;GO:0034315 regulation of Arp2/3 complex-mediated actin nucleation			Actin filaments;Focal adhesion sites;Nuclear speckles;Plasma membrane(Approved)				0.0	0.0	0.0	0.0	0.0	0.0	0.0	0.0	0.0	0.0	0.0	0.0	0.0	1.0	1.0	0.0	0.0	0.0	0.0	0.0
FERMT2	10979	symbol	H. sapiens	10979	H. sapiens	FERMT2	fermitin family member 2	GO:0048041 focal adhesion assembly;GO:0033622 integrin activation;GO:0007045 cell-substrate adherens junction assembly			Focal adhesion sites;Nucleoplasm(Supported)			(M5930)HALLMARK EPITHELIAL MESENCHYMAL TRANSITION	0.0	0.0	0.0	0.0	0.0	0.0	1.0	1.0	0.0	0.0	0.0	0.0	0.0	1.0	0.0	0.0	0.0	0.0	1.0	0.0
FEZ1	9638	symbol	H. sapiens	9638	H. sapiens	FEZ1	fasciculation and elongation protein zeta 1	GO:0061881 positive regulation of anterograde axonal transport of mitochondrion;GO:0061880 regulation of anterograde axonal transport of mitochondrion;GO:0098957 anterograde axonal transport of mitochondrion			Microtubules(Supported)Cytosol(Approved)			(M5902)HALLMARK APOPTOSIS	0.0	0.0	0.0	1.0	0.0	0.0	0.0	1.0	0.0	0.0	0.0	0.0	0.0	1.0	0.0	0.0	0.0	0.0	0.0	0.0
FGF1	2246	symbol	H. sapiens	2246	H. sapiens	FGF1	fibroblast growth factor 1	GO:0060681 branch elongation involved in ureteric bud branching;GO:0060677 ureteric bud elongation;GO:0001658 branching involved in ureteric bud morphogenesis		RAS pathway related proteins		Pentosan Polysulfate (S100 protein binding);Amlexanox (S100 protein binding);Sucrosofate (S100 protein binding);Formic Acid (S100 protein binding);O2-Sulfo-Glucuronic Acid (S100 protein binding);N,O6-Disulfo-Glucosamine (S100 protein binding);Naphthalene Trisulfonate (S100 protein binding);Pazopanib (S100 protein binding);5-AMINO-NAPHTALENE-2-MONOSULFONATE (S100 protein binding)	(M276)PID FGF PATHWAY; (M5883)NABA SECRETED FACTORS; (M5885)NABA MATRISOME ASSOCIATED		0.0	1.0	0.0	1.0	1.0	1.0	0.0	1.0	0.0	0.0	0.0	0.0	1.0	1.0	0.0	0.0	0.0	0.0	1.0	0.0
FGF5	2250	symbol	H. sapiens	2250	H. sapiens	FGF5	fibroblast growth factor 5	GO:0023019 signal transduction involved in regulation of gene expression;GO:0008543 fibroblast growth factor receptor signaling pathway;GO:0051897 positive regulation of protein kinase B signaling		RAS pathway related proteins	Nucleoli fibrillar center;Nucleus(Supported)Cytosol(Approved)		(M5883)NABA SECRETED FACTORS; (M5885)NABA MATRISOME ASSOCIATED; (M5889)NABA MATRISOME		0.0	0.0	0.0	0.0	1.0	1.0	0.0	1.0	0.0	0.0	0.0	0.0	0.0	0.0	0.0	0.0	0.0	0.0	0.0	0.0
FGFR1	2260	symbol	H. sapiens	2260	H. sapiens	FGFR1	fibroblast growth factor receptor 1	GO:0048378 regulation of lateral mesodermal cell fate specification;GO:0048377 lateral mesodermal cell fate specification;GO:0048372 lateral mesodermal cell fate commitment	Tyr protein kinase family	CD markers;Enzymes/{ENZYME proteins/Transferases,Kinases/Tyr protein kinases};RAS pathway related proteins	Nucleoli(Supported)	Palifermin (Protein tyrosine kinase activity);Sorafenib (Protein tyrosine kinase activity);SU4984 (Protein tyrosine kinase activity);XL999 (Protein tyrosine kinase activity);3-(3-methoxybenzyl)-1H-pyrrolo[2,3-b]pyridine (Protein tyrosine kinase activity);(E)-[4-(3,5-difluorophenyl)-3H-pyrrolo[2,3-b]pyridin-3-ylidene](3-methoxyphenyl)methanol (Protein tyrosine kinase activity);3-[(3-(2-CARBOXYETHY…	(M33)PID GLYPICAN 1PATHWAY; (M165)PID SYNDECAN 4 PATHWAY; (M266)PID NCADHERIN PATHWAY	(M5944)HALLMARK ANGIOGENESIS	0.0	1.0	1.0	1.0	0.0	1.0	0.0	1.0	1.0	0.0	0.0	0.0	1.0	1.0	0.0	0.0	1.0	1.0	1.0	1.0
FHL3	2275	symbol	H. sapiens	2275	H. sapiens	FHL3	four and a half LIM domains 3	GO:0007517 muscle organ development;GO:0030036 actin cytoskeleton organization;GO:0061061 muscle structure development			Nucleus(Approved)				0.0	0.0	0.0	0.0	0.0	0.0	0.0	0.0	0.0	0.0	0.0	0.0	0.0	0.0	1.0	0.0	1.0	0.0	0.0	0.0
FHOD1	29109	symbol	H. sapiens	29109	H. sapiens	FHOD1	formin homology 2 domain containing 1	GO:0051496 positive regulation of stress fiber assembly;GO:0051492 regulation of stress fiber assembly;GO:0051660 establishment of centrosome localization			Cytosol(Supported)				0.0	0.0	0.0	0.0	0.0	0.0	0.0	0.0	0.0	0.0	0.0	0.0	0.0	0.0	1.0	0.0	0.0	0.0	0.0	0.0
FHOD3	80206	symbol	H. sapiens	80206	H. sapiens	FHOD3	formin homology 2 domain containing 3	GO:0055003 cardiac myofibril assembly;GO:0030837 negative regulation of actin filament polymerization;GO:0045214 sarcomere organization							0.0	0.0	0.0	0.0	0.0	0.0	0.0	0.0	0.0	0.0	0.0	0.0	0.0	1.0	1.0	0.0	1.0	0.0	0.0	0.0
FIBIN	387758	symbol	H. sapiens	387758	H. sapiens	FIBIN	fin bud initiation factor homolog	GO:0071548 response to dexamethasone;GO:0010042 response to manganese ion;GO:0070528 protein kinase C signaling							0.0	0.0	0.0	0.0	0.0	0.0	0.0	0.0	0.0	0.0	0.0	0.0	0.0	0.0	0.0	0.0	0.0	0.0	0.0	0.0
FILIP1L	11259	symbol	H. sapiens	11259	H. sapiens	FILIP1L	filamin A interacting protein 1 like	GO:0008150 biological_process			Plasma membrane(Approved)				0.0	0.0	0.0	0.0	0.0	0.0	0.0	0.0	0.0	0.0	0.0	0.0	0.0	0.0	0.0	0.0	0.0	0.0	0.0	0.0
FJX1	24147	symbol	H. sapiens	24147	H. sapiens	FJX1	four-jointed box kinase 1	GO:0010842 retina layer formation;GO:0060042 retina morphogenesis in camera-type eye;GO:0003407 neural retina development			Vesicles(Approved)			(M5890)HALLMARK TNFA SIGNALING VIA NFKB	0.0	0.0	0.0	0.0	0.0	0.0	0.0	0.0	0.0	0.0	0.0	0.0	0.0	0.0	0.0	0.0	0.0	0.0	0.0	0.0
FKBP10	60681	symbol	H. sapiens	60681	H. sapiens	FKBP10	FKBP prolyl isomerase 10	GO:0000413 protein peptidyl-prolyl isomerization;GO:0018208 peptidyl-proline modification;GO:0018193 peptidyl-amino acid modification		Enzymes/ENZYME proteins/Isomerase	Vesicles(Approved)				0.0	0.0	0.0	0.0	0.0	0.0	0.0	0.0	0.0	0.0	0.0	0.0	0.0	0.0	0.0	0.0	0.0	0.0	0.0	0.0
FKBP14	55033	symbol	H. sapiens	55033	H. sapiens	FKBP14	FKBP prolyl isomerase 14	GO:0036498 IRE1-mediated unfolded protein response;GO:0000413 protein peptidyl-prolyl isomerization;GO:0030968 endoplasmic reticulum unfolded protein response		Enzymes/ENZYME proteins/Isomerase	Cytosol;Golgi apparatus;Nucleus(Approved)			(M5922)HALLMARK UNFOLDED PROTEIN RESPONSE	0.0	0.0	0.0	0.0	0.0	0.0	0.0	0.0	0.0	0.0	0.0	0.0	0.0	0.0	0.0	0.0	0.0	0.0	0.0	0.0
FKBP7	51661	symbol	H. sapiens	51661	H. sapiens	FKBP7	FKBP prolyl isomerase 7	GO:0000413 protein peptidyl-prolyl isomerization;GO:0018208 peptidyl-proline modification;GO:0018193 peptidyl-amino acid modification		Enzymes/ENZYME proteins/Isomerase	Endoplasmic reticulum(Supported)				0.0	0.0	0.0	0.0	0.0	0.0	0.0	0.0	0.0	0.0	0.0	0.0	0.0	0.0	0.0	0.0	0.0	0.0	0.0	0.0
FKBP9L	360132	gene_synonym	H. sapiens	360132	H. sapiens	FKBP9P1	FKBP prolyl isomerase 9 pseudogene 1								0.0	0.0	0.0	0.0	0.0	0.0	0.0	0.0	0.0	0.0	0.0	0.0	0.0	0.0	0.0	0.0	0.0	0.0	0.0	0.0
FKBP9	11328	symbol	H. sapiens	11328	H. sapiens	FKBP9	FKBP prolyl isomerase 9	GO:0000413 protein peptidyl-prolyl isomerization;GO:0018208 peptidyl-proline modification;GO:0006457 protein folding		Enzymes/ENZYME proteins/Isomerase	Mitochondria(Supported)Golgi apparatus;Vesicles(Approved)				0.0	0.0	0.0	0.0	0.0	0.0	0.0	0.0	0.0	0.0	0.0	0.0	0.0	0.0	0.0	0.0	0.0	0.0	0.0	0.0
FLJ10357						None	None	None	None	None	None	None	None	None	nan	nan	nan	nan	nan	nan	nan	nan	nan	nan	nan	nan	nan	nan	nan	nan	nan	nan	nan	nan
FLJ16779	100192386	symbol	H. sapiens	100192386	H. sapiens	FLJ16779	uncharacterized LOC100192386								0.0	0.0	0.0	0.0	0.0	0.0	0.0	0.0	0.0	0.0	0.0	0.0	0.0	0.0	0.0	0.0	0.0	0.0	0.0	0.0
FLJ22536						None	None	None	None	None	None	None	None	None	nan	nan	nan	nan	nan	nan	nan	nan	nan	nan	nan	nan	nan	nan	nan	nan	nan	nan	nan	nan
FLJ36031						None	None	None	None	None	None	None	None	None	nan	nan	nan	nan	nan	nan	nan	nan	nan	nan	nan	nan	nan	nan	nan	nan	nan	nan	nan	nan
FLRT2	23768	symbol	H. sapiens	23768	H. sapiens	FLRT2	fibronectin leucine rich transmembrane protein 2	GO:0061343 cell adhesion involved in heart morphogenesis;GO:2001222 regulation of neuron migration;GO:0071711 basement membrane organization							1.0	0.0	0.0	1.0	0.0	1.0	0.0	1.0	0.0	0.0	0.0	0.0	0.0	1.0	1.0	0.0	1.0	0.0	0.0	0.0
FLT1	2321	symbol	H. sapiens	2321	H. sapiens	FLT1	fms related tyrosine kinase 1	GO:0036323 vascular endothelial growth factor receptor-1 signaling pathway;GO:1905563 negative regulation of vascular endothelial cell proliferation;GO:0030949 positive regulation of vascular endothelial growth factor receptor signaling pathway	Tyr protein kinase family	Enzymes/{ENZYME proteins/Transferases,Kinases/Tyr protein kinases};RAS pathway related proteins	Plasma membrane(Supported)Actin filaments(Approved)	Sorafenib (Vegf-b-activated receptor activity);Sunitinib (Vegf-b-activated receptor activity);Vatalanib (Vegf-b-activated receptor activity);TG100801 (Vegf-b-activated receptor activity);OSI-930 (Vegf-b-activated receptor activity);ABT-869 (Vegf-b-activated receptor activity);IMC-1C11 (Vegf-b-activated receptor activity);Pazopanib (Vegf-b-activated receptor activity);Axitinib (Vegf-b-activated re…	(M137)PID VEGF VEGFR PATHWAY; (M226)PID VEGFR1 PATHWAY; (M33)PID GLYPICAN 1PATHWAY		0.0	1.0	0.0	1.0	0.0	1.0	0.0	1.0	0.0	0.0	0.0	0.0	0.0	0.0	0.0	0.0	0.0	0.0	1.0	1.0
FLT4	2324	symbol	H. sapiens	2324	H. sapiens	FLT4	fms related tyrosine kinase 4	GO:0001946 lymphangiogenesis;GO:0090037 positive regulation of protein kinase C signaling;GO:0060312 regulation of blood vessel remodeling	Tyr protein kinase family	Enzymes/{ENZYME proteins/Transferases,Kinases/Tyr protein kinases};RAS pathway related proteins	Nuclear speckles;Plasma membrane(Enhanced)Cell Junctions(Supported)	Sorafenib (Vascular endothelial growth factor-activated receptor activity);Sunitinib (Vascular endothelial growth factor-activated receptor activity);Vatalanib (Vascular endothelial growth factor-activated receptor activity);TG100801 (Vascular endothelial growth factor-activated receptor activity);ABT-869 (Vascular endothelial growth factor-activated receptor activity);IMC-1C11 (Vascular endothel…	(M137)PID VEGF VEGFR PATHWAY; (M274)PID LYMPH ANGIOGENESIS PATHWAY	(M5953)HALLMARK KRAS SIGNALING UP	0.0	1.0	0.0	1.0	0.0	1.0	0.0	1.0	0.0	0.0	0.0	0.0	0.0	0.0	0.0	0.0	0.0	0.0	0.0	0.0
FMNL1	752	symbol	H. sapiens	752	H. sapiens	FMNL1	formin like 1	GO:0006929 substrate-dependent cell migration;GO:0051014 actin filament severing;GO:0030866 cortical actin cytoskeleton organization			Cytosol(Approved)				0.0	0.0	0.0	0.0	0.0	0.0	0.0	0.0	0.0	0.0	0.0	0.0	0.0	0.0	1.0	0.0	0.0	0.0	0.0	0.0
FMNL3	91010	symbol	H. sapiens	91010	H. sapiens	FMNL3	formin like 3	GO:0030866 cortical actin cytoskeleton organization;GO:0008360 regulation of cell shape;GO:0001525 angiogenesis			Cytosol;Plasma membrane(Supported)Golgi apparatus;Vesicles(Approved)				0.0	1.0	0.0	0.0	0.0	0.0	0.0	0.0	0.0	0.0	0.0	0.0	0.0	0.0	1.0	0.0	0.0	0.0	0.0	0.0
FMOD	2331	symbol	H. sapiens	2331	H. sapiens	FMOD	fibromodulin	GO:0042340 keratan sulfate catabolic process;GO:0007181 transforming growth factor beta receptor complex assembly;GO:0018146 keratan sulfate biosynthetic process					(M5882)NABA PROTEOGLYCANS; (M5884)NABA CORE MATRISOME; (M5889)NABA MATRISOME	(M5930)HALLMARK EPITHELIAL MESENCHYMAL TRANSITION	1.0	0.0	0.0	0.0	0.0	1.0	0.0	1.0	0.0	0.0	1.0	0.0	0.0	0.0	1.0	0.0	0.0	0.0	1.0	0.0
FN1	2335	symbol	H. sapiens	2335	H. sapiens	FN1	fibronectin 1	GO:2001202 negative regulation of transforming growth factor-beta secretion;GO:1904237 positive regulation of substrate-dependent cell migration, cell attachment to substrate;GO:2001201 regulation of transforming growth factor-beta secretion				Ocriplasmin (Protease binding)	(M212)PID INTEGRIN5 PATHWAY; (M274)PID LYMPH ANGIOGENESIS PATHWAY; (M118)PID INTEGRIN A9B1 PATHWAY	(M5946)HALLMARK COAGULATION; (M5921)HALLMARK COMPLEMENT; (M5930)HALLMARK EPITHELIAL MESENCHYMAL TRANSITION	1.0	1.0	1.0	1.0	0.0	1.0	1.0	0.0	0.0	1.0	0.0	0.0	0.0	1.0	0.0	1.0	0.0	1.0	0.0	1.0
FNDC1	84624	symbol	H. sapiens	84624	H. sapiens	FNDC1	fibronectin type III domain containing 1				Nuclear speckles(Supported)		(M3008)NABA ECM GLYCOPROTEINS; (M5884)NABA CORE MATRISOME; (M5889)NABA MATRISOME		1.0	0.0	0.0	0.0	0.0	0.0	0.0	0.0	0.0	0.0	0.0	0.0	0.0	0.0	0.0	0.0	0.0	0.0	0.0	0.0
FNDC3B	64778	symbol	H. sapiens	64778	H. sapiens	FNDC3B	fibronectin type III domain containing 3B				Endoplasmic reticulum(Approved)				0.0	0.0	0.0	0.0	0.0	0.0	0.0	0.0	0.0	0.0	0.0	0.0	0.0	0.0	0.0	0.0	0.0	0.0	0.0	0.0
FOXC2	2303	symbol	H. sapiens	2303	H. sapiens	FOXC2	forkhead box C2	GO:1902257 negative regulation of apoptotic process involved in outflow tract morphogenesis;GO:0072144 glomerular mesangial cell development;GO:0035470 positive regulation of vascular wound healing		Transcription factors/Helix-turn-helix domains	Nuclear bodies;Nucleoplasm(Supported)			(M5930)HALLMARK EPITHELIAL MESENCHYMAL TRANSITION	1.0	1.0	0.0	1.0	0.0	0.0	1.0	1.0	1.0	1.0	1.0	1.0	1.0	1.0	1.0	0.0	1.0	1.0	0.0	1.0
FOXF1	2294	symbol	H. sapiens	2294	H. sapiens	FOXF1	forkhead box F1	GO:0043305 negative regulation of mast cell degranulation;GO:0048371 lateral mesodermal cell differentiation;GO:0060461 right lung morphogenesis		Transcription factors/Helix-turn-helix domains	Nucleoplasm(Approved)		(M106)PID HNF3B PATHWAY		1.0	1.0	0.0	1.0	0.0	0.0	1.0	0.0	0.0	1.0	0.0	0.0	1.0	0.0	0.0	0.0	1.0	1.0	0.0	1.0
FOXF2	2295	symbol	H. sapiens	2295	H. sapiens	FOXF2	forkhead box F2	GO:0042249 establishment of planar polarity of embryonic epithelium;GO:0048596 embryonic camera-type eye morphogenesis;GO:1902914 regulation of protein polyubiquitination		Transcription factors/Helix-turn-helix domains					1.0	0.0	0.0	0.0	0.0	0.0	0.0	0.0	0.0	0.0	0.0	0.0	1.0	0.0	0.0	0.0	0.0	1.0	0.0	1.0
FOXS1	2307	symbol	H. sapiens	2307	H. sapiens	FOXS1	forkhead box S1	GO:0040018 positive regulation of multicellular organism growth;GO:0050885 neuromuscular process controlling balance;GO:0040014 regulation of multicellular organism growth		Transcription factors/Helix-turn-helix domains	Cytosol;Nucleoplasm(Approved)				0.0	1.0	0.0	0.0	0.0	0.0	0.0	0.0	0.0	0.0	0.0	0.0	0.0	0.0	0.0	0.0	0.0	0.0	0.0	0.0
FPR1	2357	symbol	H. sapiens	2357	H. sapiens	FPR1	formyl peptide receptor 1	GO:0002430 complement receptor mediated signaling pathway;GO:0000187 activation of MAPK activity;GO:0043312 neutrophil degranulation		G-protein coupled receptors/{Chemokines and chemotactic factors receptors,GPCRs excl olfactory receptors}	Golgi apparatus;Nucleoli;Nucleus(Approved)	Nedocromil (Receptor activity)	(M174)PID UPA UPAR PATHWAY	(M5932)HALLMARK INFLAMMATORY RESPONSE; (M5913)HALLMARK INTERFERON GAMMA RESPONSE	0.0	0.0	0.0	1.0	0.0	0.0	0.0	0.0	0.0	0.0	0.0	0.0	0.0	0.0	0.0	0.0	0.0	0.0	0.0	0.0
FPR2	2358	symbol	H. sapiens	2358	H. sapiens	FPR2	formyl peptide receptor 2	GO:0061903 positive regulation of 1-phosphatidylinositol-3-kinase activity;GO:0061901 regulation of 1-phosphatidylinositol-3-kinase activity;GO:0010513 positive regulation of phosphatidylinositol biosynthetic process		G-protein coupled receptors/{Chemokines and chemotactic factors receptors,GPCRs excl olfactory receptors}			(M174)PID UPA UPAR PATHWAY		0.0	0.0	0.0	1.0	0.0	0.0	0.0	0.0	0.0	0.0	0.0	0.0	0.0	0.0	0.0	0.0	0.0	0.0	0.0	0.0
FPR3	2359	symbol	H. sapiens	2359	H. sapiens	FPR3	formyl peptide receptor 3	GO:0002430 complement receptor mediated signaling pathway;GO:0007204 positive regulation of cytosolic calcium ion concentration;GO:0051480 regulation of cytosolic calcium ion concentration		G-protein coupled receptors/{Chemokines and chemotactic factors receptors,GPCRs excl olfactory receptors}			(M174)PID UPA UPAR PATHWAY		0.0	0.0	0.0	1.0	0.0	0.0	0.0	0.0	0.0	0.0	0.0	0.0	0.0	0.0	0.0	0.0	0.0	0.0	0.0	0.0
FSTL1	11167	symbol	H. sapiens	11167	H. sapiens	FSTL1	follistatin like 1	GO:0030509 BMP signaling pathway;GO:0071773 cellular response to BMP stimulus;GO:0043687 post-translational protein modification			Cytosol;Vesicles(Approved)		(M17761)ST WNT BETA CATENIN PATHWAY; (M5883)NABA SECRETED FACTORS; (M5885)NABA MATRISOME ASSOCIATED	(M5944)HALLMARK ANGIOGENESIS; (M5930)HALLMARK EPITHELIAL MESENCHYMAL TRANSITION	0.0	0.0	0.0	0.0	1.0	0.0	0.0	1.0	0.0	0.0	0.0	0.0	0.0	0.0	0.0	0.0	0.0	0.0	1.0	0.0
FSTL3	10272	symbol	H. sapiens	10272	H. sapiens	FSTL3	follistatin like 3	GO:0045671 negative regulation of osteoclast differentiation;GO:0032926 negative regulation of activin receptor signaling pathway;GO:0002762 negative regulation of myeloid leukocyte differentiation			Nucleoplasm(Approved)		(M5883)NABA SECRETED FACTORS; (M5885)NABA MATRISOME ASSOCIATED; (M5889)NABA MATRISOME	(M5930)HALLMARK EPITHELIAL MESENCHYMAL TRANSITION	0.0	0.0	0.0	0.0	1.0	0.0	1.0	1.0	0.0	0.0	0.0	1.0	0.0	0.0	0.0	0.0	0.0	0.0	1.0	0.0
FURIN	5045	symbol	H. sapiens	5045	H. sapiens	FURIN	furin, paired basic amino acid cleaving enzyme	GO:1901394 positive regulation of transforming growth factor beta1 activation;GO:0032904 negative regulation of nerve growth factor production;GO:0019082 viral protein processing		Enzymes/{ENZYME proteins/Hydrolases,Peptidases/Serine-type peptidases}	Golgi apparatus(Supported)Nucleoplasm(Approved)	Decanoic Acid (Serine-type endopeptidase inhibitor activity);Pirfenidone (Serine-type endopeptidase inhibitor activity)	(M17)PID NOTCH PATHWAY; (M255)PID HIF1 TFPATHWAY; (M153)PID P75 NTR PATHWAY	(M5896)HALLMARK TGF BETA SIGNALING; (M5946)HALLMARK COAGULATION; (M5941)HALLMARK UV RESPONSE UP	1.0	0.0	1.0	0.0	1.0	1.0	0.0	1.0	0.0	0.0	0.0	0.0	0.0	0.0	0.0	0.0	0.0	0.0	1.0	0.0
FUT11	170384	symbol	H. sapiens	170384	H. sapiens	FUT11	fucosyltransferase 11	GO:0036065 fucosylation;GO:0006486 protein glycosylation;GO:0043413 macromolecule glycosylation			Golgi apparatus;Nuclear membrane(Approved)				0.0	0.0	0.0	0.0	0.0	0.0	0.0	0.0	0.0	0.0	0.0	0.0	0.0	0.0	0.0	0.0	0.0	0.0	0.0	0.0
FYN	2534	symbol	H. sapiens	2534	H. sapiens	FYN	FYN proto-oncogene, Src family tyrosine kinase	GO:1905664 regulation of calcium ion import across plasma membrane;GO:0098703 calcium ion import across plasma membrane;GO:1903997 positive regulation of non-membrane spanning protein tyrosine kinase activity	Tyr protein kinase family	Enzymes/{ENZYME proteins/Transferases,Kinases/Tyr protein kinases}	Cytosol;Plasma membrane(Enhanced)	Dasatinib (Protein tyrosine kinase activity);1-Methoxy-2-[2-(2-Methoxy-Ethoxy]-Ethane (Protein tyrosine kinase activity)	(M251)PID SYNDECAN 3 PATHWAY; (M184)PID ECADHERIN KERATINOCYTE PATHWAY; (M33)PID GLYPICAN 1PATHWAY	(M5946)HALLMARK COAGULATION; (M5942)HALLMARK UV RESPONSE DN; (M5921)HALLMARK COMPLEMENT	0.0	0.0	1.0	1.0	0.0	1.0	1.0	1.0	0.0	1.0	0.0	0.0	0.0	1.0	0.0	0.0	0.0	0.0	1.0	0.0
G0S2	50486	symbol	H. sapiens	50486	H. sapiens	G0S2	G0/G1 switch 2	GO:2001238 positive regulation of extrinsic apoptotic signaling pathway;GO:0120162 positive regulation of cold-induced thermogenesis;GO:0120161 regulation of cold-induced thermogenesis						(M5935)HALLMARK FATTY ACID METABOLISM; (M5890)HALLMARK TNFA SIGNALING VIA NFKB; (M5953)HALLMARK KRAS SIGNALING UP	0.0	0.0	0.0	0.0	0.0	0.0	0.0	0.0	0.0	0.0	0.0	0.0	0.0	0.0	0.0	0.0	0.0	0.0	0.0	0.0
GABRD	2563	symbol	H. sapiens	2563	H. sapiens	GABRD	gamma-aminobutyric acid type A receptor delta subunit	GO:1902476 chloride transmembrane transport;GO:0006821 chloride transport;GO:0098661 inorganic anion transmembrane transport			Golgi apparatus;Vesicles(Uncertain)	Temazepam (Gaba-a receptor activity);Adinazolam (Gaba-a receptor activity);Midazolam (Gaba-a receptor activity);Flurazepam (Gaba-a receptor activity);Halazepam (Gaba-a receptor activity);Diazepam (Gaba-a receptor activity);Oxazepam (Gaba-a receptor activity);Triazolam (Gaba-a receptor activity);Ethanol (Gaba-a receptor activity);Estazolam (Gaba-a receptor activity);Bromazepam (Gaba-a receptor act…			0.0	0.0	0.0	0.0	0.0	0.0	0.0	0.0	0.0	0.0	0.0	0.0	0.0	0.0	0.0	0.0	0.0	0.0	0.0	0.0
GALNT2	2590	symbol	H. sapiens	2590	H. sapiens	GALNT2	polypeptide N-acetylgalactosaminyltransferase 2	GO:0018243 protein O-linked glycosylation via threonine;GO:0002378 immunoglobulin biosynthetic process;GO:0018242 protein O-linked glycosylation via serine		Enzymes/ENZYME proteins/Transferases	Golgi apparatus(Enhanced)				0.0	0.0	0.0	0.0	0.0	0.0	0.0	0.0	0.0	0.0	0.0	0.0	0.0	0.0	0.0	0.0	0.0	0.0	0.0	0.0
GALNTL2	117248	gene_synonym	H. sapiens	117248	H. sapiens	GALNT15	polypeptide N-acetylgalactosaminyltransferase 15	GO:0016266 O-glycan processing;GO:0006493 protein O-linked glycosylation;GO:0006486 protein glycosylation		Enzymes/ENZYME proteins/Transferases	Cytosol;Golgi apparatus(Approved)				0.0	0.0	0.0	0.0	0.0	0.0	0.0	0.0	0.0	0.0	0.0	0.0	0.0	0.0	0.0	0.0	0.0	0.0	0.0	0.0
GALNTL4	374378	gene_synonym	H. sapiens	374378	H. sapiens	GALNT18	polypeptide N-acetylgalactosaminyltransferase 18	GO:0006493 protein O-linked glycosylation;GO:0006486 protein glycosylation;GO:0043413 macromolecule glycosylation		Enzymes/ENZYME proteins/Transferases	Mitochondria(Approved)				0.0	0.0	0.0	0.0	0.0	0.0	0.0	0.0	0.0	0.0	0.0	0.0	0.0	0.0	0.0	0.0	0.0	0.0	0.0	0.0
GAS1	2619	symbol	H. sapiens	2619	H. sapiens	GAS1	growth arrest specific 1	GO:0060628 regulation of ER to Golgi vesicle-mediated transport;GO:0010955 negative regulation of protein processing;GO:1903318 negative regulation of protein maturation			Nuclear speckles(Approved)		(M211)PID HEDGEHOG 2PATHWAY; (M176)PID FOXM1 PATHWAY	(M5916)HALLMARK APICAL SURFACE; (M5930)HALLMARK EPITHELIAL MESENCHYMAL TRANSITION	0.0	0.0	0.0	0.0	0.0	0.0	0.0	1.0	0.0	0.0	0.0	0.0	0.0	0.0	0.0	0.0	0.0	0.0	0.0	0.0
GDF11	10220	symbol	H. sapiens	10220	H. sapiens	GDF11	growth differentiation factor 11	GO:0021512 spinal cord anterior/posterior patterning;GO:0001657 ureteric bud development;GO:0072164 mesonephric tubule development			Vesicles(Approved)		(M5883)NABA SECRETED FACTORS; (M5885)NABA MATRISOME ASSOCIATED; (M5889)NABA MATRISOME		0.0	0.0	0.0	0.0	1.0	0.0	0.0	0.0	1.0	0.0	0.0	0.0	0.0	1.0	0.0	0.0	0.0	0.0	1.0	0.0
GEFT	115557	gene_synonym	H. sapiens	115557	H. sapiens	ARHGEF25	Rho guanine nucleotide exchange factor 25	GO:0035023 regulation of Rho protein signal transduction;GO:0007266 Rho protein signal transduction;GO:0046578 regulation of Ras protein signal transduction			Vesicles(Approved)		(M83)PID CDC42 REG PATHWAY; (M241)PID RAC1 REG PATHWAY; (M68)PID RHOA REG PATHWAY		0.0	0.0	0.0	0.0	0.0	0.0	0.0	0.0	0.0	0.0	0.0	0.0	0.0	0.0	0.0	0.0	0.0	0.0	0.0	0.0
GFPT2	9945	symbol	H. sapiens	9945	H. sapiens	GFPT2	glutamine-fructose-6-phosphate transaminase 2	GO:0006048 UDP-N-acetylglucosamine biosynthetic process;GO:0006541 glutamine metabolic process;GO:0006047 UDP-N-acetylglucosamine metabolic process		Enzymes/ENZYME proteins/Transferases	Vesicles(Supported)			(M5890)HALLMARK TNFA SIGNALING VIA NFKB; (M5953)HALLMARK KRAS SIGNALING UP	0.0	0.0	0.0	0.0	0.0	0.0	0.0	0.0	0.0	0.0	0.0	0.0	0.0	0.0	0.0	0.0	0.0	0.0	0.0	0.0
GGT5	2687	symbol	H. sapiens	2687	H. sapiens	GGT5	gamma-glutamyltransferase 5	GO:1901750 leukotriene D4 biosynthetic process;GO:1901748 leukotriene D4 metabolic process;GO:0019370 leukotriene biosynthetic process		Enzymes/ENZYME proteins/{Hydrolases,Transferases}	Nucleoli fibrillar center(Approved)				0.0	0.0	0.0	0.0	0.0	0.0	0.0	0.0	0.0	0.0	0.0	0.0	0.0	0.0	0.0	0.0	0.0	0.0	0.0	0.0
GIPC3	126326	symbol	H. sapiens	126326	H. sapiens	GIPC3	GIPC PDZ domain containing family member 3				Golgi apparatus;Nuclear bodies;Nucleoplasm(Approved)				0.0	0.0	0.0	0.0	0.0	0.0	0.0	0.0	0.0	0.0	0.0	0.0	0.0	0.0	0.0	0.0	0.0	0.0	0.0	0.0
GJA1	2697	symbol	H. sapiens	2697	H. sapiens	GJA1	gap junction protein alpha 1	GO:0003104 positive regulation of glomerular filtration;GO:0086014 atrial cardiac muscle cell action potential;GO:0060156 milk ejection reflex			Cell Junctions(Supported)Nucleoplasm;Vesicles(Approved)	Carvedilol (Signal transducer activity)	(M266)PID NCADHERIN PATHWAY; (M65)PID FRA PATHWAY; (M167)PID AP1 PATHWAY	(M5942)HALLMARK UV RESPONSE DN; (M5906)HALLMARK ESTROGEN RESPONSE EARLY; (M5930)HALLMARK EPITHELIAL MESENCHYMAL TRANSITION	0.0	1.0	0.0	0.0	0.0	0.0	0.0	0.0	1.0	1.0	0.0	1.0	1.0	1.0	1.0	0.0	1.0	0.0	0.0	1.0
GJA5	2702	symbol	H. sapiens	2702	H. sapiens	GJA5	gap junction protein alpha 5	GO:0098906 regulation of Purkinje myocyte action potential;GO:1900133 regulation of renin secretion into blood stream;GO:0098905 regulation of bundle of His cell action potential						(M5909)HALLMARK MYOGENESIS	0.0	1.0	0.0	0.0	0.0	0.0	0.0	0.0	1.0	1.0	0.0	0.0	0.0	1.0	1.0	0.0	1.0	0.0	0.0	1.0
GJC1	10052	symbol	H. sapiens	10052	H. sapiens	GJC1	gap junction protein gamma 1	GO:0086021 SA node cell to atrial cardiac muscle cell communication by electrical coupling;GO:0086053 AV node cell to bundle of His cell communication by electrical coupling;GO:0086014 atrial cardiac muscle cell action potential		Transporters/Transporter channels and pores	Cell Junctions(Supported)Cytosol;Nucleoli(Uncertain)				0.0	1.0	0.0	0.0	0.0	0.0	0.0	0.0	0.0	0.0	0.0	0.0	0.0	0.0	1.0	0.0	1.0	0.0	0.0	0.0
GJD3	125111	symbol	H. sapiens	125111	H. sapiens	GJD3	gap junction protein delta 3	GO:0086064 cell communication by electrical coupling involved in cardiac conduction;GO:0016264 gap junction assembly;GO:0086065 cell communication involved in cardiac conduction							0.0	0.0	0.0	0.0	0.0	0.0	0.0	0.0	0.0	0.0	0.0	0.0	0.0	0.0	0.0	0.0	0.0	0.0	0.0	0.0
GLI3	2737	symbol	H. sapiens	2737	H. sapiens	GLI3	GLI family zinc finger 3	GO:0022018 lateral ganglionic eminence cell proliferation;GO:0021819 layer formation in cerebral cortex;GO:0021775 smoothened signaling pathway involved in ventral spinal cord interneuron specification		Transcription factors/Zinc-coordinating DNA-binding domains			(M219)PID HEDGEHOG GLI PATHWAY		0.0	1.0	0.0	1.0	0.0	0.0	1.0	0.0	1.0	1.0	0.0	1.0	1.0	1.0	0.0	0.0	1.0	0.0	0.0	1.0
GLIPR1	11010	symbol	H. sapiens	11010	H. sapiens	GLIPR1	GLI pathogenesis related 1	GO:0043312 neutrophil degranulation;GO:0002283 neutrophil activation involved in immune response;GO:0042119 neutrophil activation				SOT-107		(M5930)HALLMARK EPITHELIAL MESENCHYMAL TRANSITION	0.0	0.0	0.0	0.0	0.0	0.0	0.0	0.0	0.0	0.0	0.0	0.0	0.0	0.0	0.0	0.0	0.0	0.0	0.0	0.0
GLIPR2	152007	symbol	H. sapiens	152007	H. sapiens	GLIPR2	GLI pathogenesis related 2	GO:0010718 positive regulation of epithelial to mesenchymal transition;GO:0010717 regulation of epithelial to mesenchymal transition;GO:0010634 positive regulation of epithelial cell migration			Microtubules;Vesicles(Uncertain)	Cysteinesulfonic Acid (Protein homodimerization activity)		(M5947)HALLMARK IL2 STAT5 SIGNALING	0.0	1.0	0.0	1.0	0.0	0.0	0.0	0.0	0.0	0.0	0.0	0.0	0.0	0.0	0.0	0.0	0.0	1.0	0.0	0.0
GLIS1	148979	symbol	H. sapiens	148979	H. sapiens	GLIS1	GLIS family zinc finger 1	GO:0010454 negative regulation of cell fate commitment;GO:0010453 regulation of cell fate commitment;GO:0001649 osteoblast differentiation		Transcription factors/Zinc-coordinating DNA-binding domains					0.0	0.0	0.0	0.0	0.0	0.0	0.0	0.0	0.0	0.0	0.0	1.0	0.0	0.0	0.0	0.0	0.0	0.0	0.0	0.0
GLIS2	84662	symbol	H. sapiens	84662	H. sapiens	GLIS2	GLIS family zinc finger 2	GO:0060994 regulation of transcription from RNA polymerase II promoter involved in kidney development;GO:1900182 positive regulation of protein localization to nucleus;GO:0045879 negative regulation of smoothened signaling pathway		Transcription factors/Zinc-coordinating DNA-binding domains	Cytosol;Nucleoplasm;Plasma membrane(Approved)				0.0	0.0	0.0	0.0	0.0	0.0	0.0	0.0	0.0	0.0	0.0	0.0	0.0	0.0	0.0	0.0	0.0	0.0	0.0	0.0
GLIS3	169792	symbol	H. sapiens	169792	H. sapiens	GLIS3	GLIS family zinc finger 3	GO:0000122 negative regulation of transcription by RNA polymerase II;GO:0045944 positive regulation of transcription by RNA polymerase II;GO:0045892 negative regulation of transcription, DNA-templated		Transcription factors/Zinc-coordinating DNA-binding domains	Nucleoplasm(Supported)				0.0	0.0	0.0	0.0	0.0	0.0	0.0	0.0	0.0	0.0	0.0	0.0	0.0	0.0	0.0	0.0	0.0	0.0	0.0	0.0
GLRB	2743	symbol	H. sapiens	2743	H. sapiens	GLRB	glycine receptor beta	GO:0097112 gamma-aminobutyric acid receptor clustering;GO:0060012 synaptic transmission, glycinergic;GO:0060013 righting reflex		Transporters/Transporter channels and pores		Glycine (Glycine binding);Lindane (Glycine binding)			0.0	0.0	0.0	0.0	0.0	0.0	0.0	0.0	0.0	0.0	0.0	0.0	0.0	0.0	0.0	0.0	0.0	0.0	0.0	0.0
GLS	2744	symbol	H. sapiens	2744	H. sapiens	GLS	glutaminase	GO:0006543 glutamine catabolic process;GO:0006537 glutamate biosynthetic process;GO:0002087 regulation of respiratory gaseous exchange by neurological system process		Enzymes/ENZYME proteins/Hydrolases	Mitochondria(Supported)	L-Glutamic Acid (Glutaminase activity)		(M5941)HALLMARK UV RESPONSE UP	0.0	0.0	0.0	0.0	0.0	0.0	0.0	0.0	0.0	0.0	0.0	0.0	0.0	0.0	0.0	0.0	0.0	0.0	0.0	0.0
GLT25D1	79709	gene_synonym	H. sapiens	79709	H. sapiens	COLGALT1	collagen beta(1-O)galactosyltransferase 1	GO:1904028 positive regulation of collagen fibril organization;GO:1904026 regulation of collagen fibril organization;GO:1903055 positive regulation of extracellular matrix organization		Enzymes/ENZYME proteins/Transferases	Vesicles(Approved)			(M5930)HALLMARK EPITHELIAL MESENCHYMAL TRANSITION	1.0	0.0	1.0	0.0	0.0	0.0	0.0	0.0	0.0	0.0	1.0	0.0	0.0	0.0	1.0	0.0	0.0	0.0	0.0	0.0
GLT8D2	83468	symbol	H. sapiens	83468	H. sapiens	GLT8D2	glycosyltransferase 8 domain containing 2				Cytosol(Approved)				0.0	0.0	0.0	0.0	0.0	0.0	0.0	0.0	0.0	0.0	0.0	0.0	0.0	0.0	0.0	0.0	0.0	0.0	0.0	0.0
GNA12	2768	symbol	H. sapiens	2768	H. sapiens	GNA12	G protein subunit alpha 12	GO:0010762 regulation of fibroblast migration;GO:0042733 embryonic digit morphogenesis;GO:0032434 regulation of proteasomal ubiquitin-dependent protein catabolic process			Cytosol(Supported)		(M64)PID S1P S1P4 PATHWAY; (M155)PID S1P META PATHWAY; (M268)PID S1P S1P2 PATHWAY		0.0	1.0	0.0	0.0	0.0	0.0	0.0	0.0	0.0	1.0	0.0	0.0	0.0	0.0	0.0	0.0	0.0	0.0	0.0	1.0
GNB4	59345	symbol	H. sapiens	59345	H. sapiens	GNB4	G protein subunit beta 4	GO:0021762 substantia nigra development;GO:0030901 midbrain development;GO:0048857 neural nucleus development		RAS pathway related proteins	Plasma membrane(Enhanced)			(M5921)HALLMARK COMPLEMENT	0.0	0.0	0.0	0.0	0.0	1.0	0.0	0.0	0.0	0.0	0.0	0.0	0.0	0.0	0.0	0.0	0.0	0.0	0.0	0.0
GNG11	2791	symbol	H. sapiens	2791	H. sapiens	GNG11	G protein subunit gamma 11	GO:0007186 G protein-coupled receptor signaling pathway;GO:0007165 signal transduction;GO:0023052 signaling		RAS pathway related proteins				(M5953)HALLMARK KRAS SIGNALING UP	0.0	0.0	0.0	0.0	0.0	1.0	0.0	0.0	0.0	0.0	0.0	0.0	0.0	0.0	0.0	0.0	0.0	0.0	0.0	0.0
GNG2	54331	symbol	H. sapiens	54331	H. sapiens	GNG2	G protein subunit gamma 2	GO:0071380 cellular response to prostaglandin E stimulus;GO:0007191 adenylate cyclase-activating dopamine receptor signaling pathway;GO:0007223 Wnt signaling pathway, calcium modulating pathway		RAS pathway related proteins	Golgi apparatus;Vesicles(Approved)	Halothane (Signal transducer activity)	(M138)PID THROMBIN PAR4 PATHWAY; (M252)PID IL8 CXCR1 PATHWAY; (M213)PID AR NONGENOMIC PATHWAY	(M5921)HALLMARK COMPLEMENT	0.0	0.0	0.0	0.0	0.0	1.0	0.0	0.0	0.0	1.0	0.0	0.0	0.0	0.0	0.0	0.0	0.0	0.0	0.0	0.0
GPC6	10082	symbol	H. sapiens	10082	H. sapiens	GPC6	glypican 6	GO:0098696 regulation of neurotransmitter receptor localization to postsynaptic specialization membrane;GO:0099645 neurotransmitter receptor localization to postsynaptic specialization membrane;GO:0060071 Wnt signaling pathway, planar cell polarity pathway			Golgi apparatus;Vesicles(Approved)		(M5880)NABA ECM AFFILIATED; (M5885)NABA MATRISOME ASSOCIATED; (M5889)NABA MATRISOME		0.0	0.0	0.0	0.0	1.0	0.0	0.0	0.0	0.0	0.0	0.0	0.0	1.0	0.0	0.0	0.0	0.0	0.0	0.0	0.0
GPR116	221395	gene_synonym	H. sapiens	221395	H. sapiens	ADGRF5	adhesion G protein-coupled receptor F5	GO:0061626 pharyngeal arch artery morphogenesis;GO:0043031 negative regulation of macrophage activation;GO:0043129 surfactant homeostasis		G-protein coupled receptors/{Family 2 (B) receptors,GPCRs excl olfactory receptors}					0.0	1.0	0.0	0.0	0.0	0.0	0.0	0.0	0.0	0.0	0.0	0.0	0.0	0.0	0.0	0.0	0.0	0.0	0.0	1.0
GPR124	25960	gene_synonym	H. sapiens	25960	H. sapiens	ADGRA2	adhesion G protein-coupled receptor A2	GO:1900747 negative regulation of vascular endothelial growth factor signaling pathway;GO:1902548 negative regulation of cellular response to vascular endothelial growth factor stimulus;GO:0090210 regulation of establishment of blood-brain barrier		G-protein coupled receptors/{Family 2 (B) receptors,GPCRs excl olfactory receptors}			(M160)PID AVB3 INTEGRIN PATHWAY	(M5953)HALLMARK KRAS SIGNALING UP	0.0	1.0	1.0	1.0	0.0	0.0	0.0	1.0	0.0	0.0	0.0	0.0	0.0	0.0	0.0	0.0	0.0	0.0	1.0	0.0
GPR141	353345	symbol	H. sapiens	353345	H. sapiens	GPR141	G protein-coupled receptor 141	GO:0007186 G protein-coupled receptor signaling pathway;GO:0007165 signal transduction;GO:0023052 signaling		G-protein coupled receptors/GPCRs excl olfactory receptors					0.0	0.0	0.0	0.0	0.0	0.0	0.0	0.0	0.0	0.0	0.0	0.0	0.0	0.0	0.0	0.0	0.0	0.0	0.0	0.0
GPR162	27239	symbol	H. sapiens	27239	H. sapiens	GPR162	G protein-coupled receptor 162	GO:0007186 G protein-coupled receptor signaling pathway;GO:0007165 signal transduction;GO:0023052 signaling		G-protein coupled receptors/GPCRs excl olfactory receptors	Microtubule organizing center(Approved)				0.0	0.0	0.0	0.0	0.0	0.0	0.0	0.0	0.0	0.0	0.0	0.0	0.0	0.0	0.0	0.0	0.0	0.0	0.0	0.0
GPR173	54328	symbol	H. sapiens	54328	H. sapiens	GPR173	G protein-coupled receptor 173	GO:0097211 cellular response to gonadotropin-releasing hormone;GO:2001223 negative regulation of neuron migration;GO:0097210 response to gonadotropin-releasing hormone		G-protein coupled receptors/GPCRs excl olfactory receptors	Cytosol;Plasma membrane(Approved)				0.0	0.0	0.0	0.0	0.0	0.0	0.0	0.0	0.0	0.0	0.0	0.0	0.0	0.0	0.0	0.0	0.0	0.0	0.0	0.0
GPR176	11245	symbol	H. sapiens	11245	H. sapiens	GPR176	G protein-coupled receptor 176	GO:0007193 adenylate cyclase-inhibiting G protein-coupled receptor signaling pathway;GO:0048512 circadian behavior;GO:0007622 rhythmic behavior		G-protein coupled receptors/GPCRs excl olfactory receptors					0.0	0.0	0.0	0.0	0.0	0.0	0.0	0.0	0.0	0.0	0.0	0.0	0.0	0.0	0.0	0.0	0.0	0.0	0.0	0.0
GPR34	2857	symbol	H. sapiens	2857	H. sapiens	GPR34	G protein-coupled receptor 34	GO:0035589 G protein-coupled purinergic nucleotide receptor signaling pathway;GO:0035590 purinergic nucleotide receptor signaling pathway;GO:0035588 G protein-coupled purinergic receptor signaling pathway		G-protein coupled receptors/GPCRs excl olfactory receptors	Cytosol;Nucleus(Uncertain)				0.0	0.0	0.0	0.0	0.0	0.0	0.0	0.0	0.0	0.0	0.0	0.0	0.0	0.0	0.0	0.0	0.0	0.0	0.0	0.0
GPR4	2828	symbol	H. sapiens	2828	H. sapiens	GPR4	G protein-coupled receptor 4	GO:0072144 glomerular mesangial cell development;GO:0072008 glomerular mesangial cell differentiation;GO:0072143 mesangial cell development		G-protein coupled receptors/GPCRs excl olfactory receptors					0.0	1.0	0.0	0.0	0.0	0.0	0.0	0.0	1.0	1.0	0.0	0.0	0.0	0.0	0.0	0.0	0.0	0.0	0.0	0.0
GPR68	8111	symbol	H. sapiens	8111	H. sapiens	GPR68	G protein-coupled receptor 68	GO:0071467 cellular response to pH;GO:0009268 response to pH;GO:0071214 cellular response to abiotic stimulus		G-protein coupled receptors/GPCRs excl olfactory receptors					0.0	0.0	0.0	0.0	0.0	0.0	0.0	0.0	0.0	0.0	0.0	0.0	0.0	0.0	0.0	0.0	0.0	0.0	0.0	0.0
GPR84	53831	symbol	H. sapiens	53831	H. sapiens	GPR84	G protein-coupled receptor 84	GO:0043312 neutrophil degranulation;GO:0002283 neutrophil activation involved in immune response;GO:0042119 neutrophil activation		G-protein coupled receptors/GPCRs excl olfactory receptors					0.0	0.0	0.0	0.0	0.0	0.0	0.0	0.0	0.0	0.0	0.0	0.0	0.0	0.0	0.0	0.0	0.0	0.0	0.0	0.0
GPR85	54329	symbol	H. sapiens	54329	H. sapiens	GPR85	G protein-coupled receptor 85	GO:0007186 G protein-coupled receptor signaling pathway;GO:0007165 signal transduction;GO:0023052 signaling		G-protein coupled receptors/GPCRs excl olfactory receptors					0.0	0.0	0.0	0.0	0.0	0.0	0.0	0.0	0.0	0.0	0.0	0.0	0.0	0.0	0.0	0.0	0.0	0.0	0.0	0.0
GPR97	222487	gene_synonym	H. sapiens	222487	H. sapiens	ADGRG3	adhesion G protein-coupled receptor G3	GO:0032792 negative regulation of CREB transcription factor activity;GO:1901223 negative regulation of NIK/NF-kappaB signaling;GO:0043312 neutrophil degranulation		G-protein coupled receptors/{Family 2 (B) receptors,GPCRs excl olfactory receptors}					0.0	0.0	0.0	0.0	0.0	0.0	0.0	0.0	0.0	0.0	0.0	0.0	0.0	0.0	0.0	0.0	0.0	0.0	0.0	0.0
GPSM1	26086	symbol	H. sapiens	26086	H. sapiens	GPSM1	G protein signaling modulator 1	GO:1905098 negative regulation of guanyl-nucleotide exchange factor activity;GO:1905097 regulation of guanyl-nucleotide exchange factor activity;GO:1904424 regulation of GTP binding			Golgi apparatus(Supported)Nucleoplasm(Approved)				0.0	0.0	0.0	0.0	0.0	0.0	0.0	0.0	0.0	0.0	0.0	0.0	0.0	0.0	0.0	0.0	0.0	0.0	0.0	0.0
GPX7	2882	symbol	H. sapiens	2882	H. sapiens	GPX7	glutathione peroxidase 7	GO:0098869 cellular oxidant detoxification;GO:1990748 cellular detoxification;GO:0098754 detoxification		Enzymes/ENZYME proteins/Oxidoreductases	Nucleoli(Approved)	Glutathione (Peroxidase activity)		(M5930)HALLMARK EPITHELIAL MESENCHYMAL TRANSITION	0.0	0.0	0.0	0.0	0.0	0.0	0.0	0.0	0.0	0.0	0.0	0.0	0.0	0.0	0.0	0.0	0.0	0.0	0.0	0.0
GPX8	493869	symbol	H. sapiens	493869	H. sapiens	GPX8	glutathione peroxidase 8 (putative)	GO:0098869 cellular oxidant detoxification;GO:1990748 cellular detoxification;GO:0098754 detoxification		Enzymes/ENZYME proteins/Oxidoreductases	Actin filaments;Cytosol(Supported)	Glutathione (Peroxidase activity)		(M5892)HALLMARK CHOLESTEROL HOMEOSTASIS	0.0	0.0	0.0	0.0	0.0	0.0	0.0	0.0	0.0	0.0	0.0	0.0	0.0	0.0	0.0	0.0	0.0	0.0	0.0	0.0
GRAMD1A	57655	symbol	H. sapiens	57655	H. sapiens	GRAMD1A	GRAM domain containing 1A	GO:0120011 intermembrane sterol transfer;GO:0071397 cellular response to cholesterol;GO:0120009 intermembrane lipid transfer			Cytosol;Plasma membrane(Approved)				0.0	0.0	0.0	0.0	0.0	0.0	0.0	0.0	0.0	0.0	0.0	0.0	0.0	0.0	0.0	0.0	0.0	0.0	0.0	0.0
GREM1	26585	symbol	H. sapiens	26585	H. sapiens	GREM1	gremlin 1, DAN family BMP antagonist	GO:0090190 positive regulation of branching involved in ureteric bud morphogenesis;GO:0060676 ureteric bud formation;GO:0090189 regulation of branching involved in ureteric bud morphogenesis					(M181)PID BMP PATHWAY; (M5880)NABA ECM AFFILIATED; (M5885)NABA MATRISOME ASSOCIATED	(M5930)HALLMARK EPITHELIAL MESENCHYMAL TRANSITION	1.0	1.0	0.0	1.0	1.0	0.0	1.0	1.0	1.0	0.0	1.0	1.0	1.0	1.0	1.0	0.0	1.0	1.0	1.0	1.0
GRIA3	2892	symbol	H. sapiens	2892	H. sapiens	GRIA3	glutamate ionotropic receptor AMPA type subunit 3	GO:2000310 regulation of NMDA receptor activity;GO:0035235 ionotropic glutamate receptor signaling pathway;GO:1900449 regulation of glutamate receptor signaling pathway		Transporters/Transporter channels and pores		L-Glutamic Acid (Extracellular-glutamate-gated ion channel activity);Ethanol (Extracellular-glutamate-gated ion channel activity);Lithium (Extracellular-glutamate-gated ion channel activity);Aniracetam (Extracellular-glutamate-gated ion channel activity);Talampanel (Extracellular-glutamate-gated ion channel activity);CX717 (Extracellular-glutamate-gated ion channel activity)			0.0	0.0	0.0	0.0	0.0	0.0	0.0	0.0	0.0	0.0	0.0	0.0	0.0	0.0	0.0	0.0	0.0	0.0	0.0	0.0
GRID1	2894	symbol	H. sapiens	2894	H. sapiens	GRID1	glutamate ionotropic receptor delta type subunit 1	GO:0035235 ionotropic glutamate receptor signaling pathway;GO:0035176 social behavior;GO:0035249 synaptic transmission, glutamatergic				L-Glutamic Acid (Ionotropic glutamate receptor activity)			0.0	0.0	0.0	0.0	0.0	0.0	0.0	0.0	0.0	0.0	0.0	0.0	0.0	0.0	0.0	0.0	0.0	0.0	0.0	0.0
GRP	2922	symbol	H. sapiens	2922	H. sapiens	GRP	gastrin releasing peptide	GO:1900738 positive regulation of phospholipase C-activating G protein-coupled receptor signaling pathway;GO:0036343 psychomotor behavior;GO:1900736 regulation of phospholipase C-activating G protein-coupled receptor signaling pathway							0.0	0.0	0.0	0.0	0.0	0.0	0.0	0.0	0.0	0.0	0.0	0.0	0.0	0.0	0.0	0.0	0.0	0.0	0.0	0.0
GUCA1A	2978	symbol	H. sapiens	2978	H. sapiens	GUCA1A	guanylate cyclase activator 1A	GO:0031284 positive regulation of guanylate cyclase activity;GO:0022400 regulation of rhodopsin mediated signaling pathway;GO:0031282 regulation of guanylate cyclase activity			Plasma membrane(Uncertain)	MYRISTIC ACID (Calcium sensitive guanylate cyclase activator activity)	(M117)PID CONE PATHWAY; (M204)PID RHODOPSIN PATHWAY		0.0	0.0	0.0	0.0	0.0	0.0	0.0	0.0	0.0	0.0	0.0	0.0	0.0	0.0	0.0	0.0	0.0	0.0	0.0	0.0
GUCY1A2	2977	symbol	H. sapiens	2977	H. sapiens	GUCY1A2	guanylate cyclase 1 soluble subunit alpha 2	GO:0010750 positive regulation of nitric oxide mediated signal transduction;GO:0006182 cGMP biosynthetic process;GO:0010749 regulation of nitric oxide mediated signal transduction		Enzymes/ENZYME proteins/Lyases		Nitric Oxide (Heme binding);Isosorbide Mononitrate (Heme binding);Riociguat (Heme binding)			0.0	0.0	0.0	0.0	0.0	0.0	0.0	0.0	0.0	0.0	0.0	0.0	0.0	0.0	0.0	0.0	0.0	0.0	0.0	0.0
GUCY1A3	2982	gene_synonym	H. sapiens	2982	H. sapiens	GUCY1A1	guanylate cyclase 1 soluble subunit alpha 1	GO:0098925 retrograde trans-synaptic signaling by nitric oxide, modulating synaptic transmission;GO:0052565 response to defense-related host nitric oxide production;GO:0099555 trans-synaptic signaling by nitric oxide, modulating synaptic transmission		Enzymes/ENZYME proteins/Lyases	Nucleus(Supported)			(M5908)HALLMARK ANDROGEN RESPONSE; (M5953)HALLMARK KRAS SIGNALING UP	0.0	0.0	0.0	0.0	0.0	0.0	0.0	0.0	0.0	0.0	0.0	0.0	0.0	1.0	0.0	0.0	0.0	0.0	0.0	0.0
GUCY1B3	2983	gene_synonym	H. sapiens	2983	H. sapiens	GUCY1B1	guanylate cyclase 1 soluble subunit beta 1	GO:0099555 trans-synaptic signaling by nitric oxide, modulating synaptic transmission;GO:0099554 trans-synaptic signaling by soluble gas, modulating synaptic transmission;GO:0038060 nitric oxide-cGMP-mediated signaling pathway		Enzymes/ENZYME proteins/Lyases	Cytosol(Approved)			(M5947)HALLMARK IL2 STAT5 SIGNALING	0.0	0.0	0.0	0.0	0.0	0.0	0.0	0.0	0.0	0.0	0.0	0.0	0.0	0.0	0.0	0.0	0.0	0.0	0.0	0.0
GXYLT2	727936	symbol	H. sapiens	727936	H. sapiens	GXYLT2	glucoside xylosyltransferase 2	GO:0016266 O-glycan processing;GO:0006493 protein O-linked glycosylation;GO:0006486 protein glycosylation		Enzymes/ENZYME proteins/Transferases	Cytokinetic bridge;Midbody ring;Nucleoplasm(Approved)				0.0	0.0	0.0	0.0	0.0	0.0	0.0	0.0	0.0	0.0	0.0	0.0	0.0	0.0	0.0	0.0	0.0	0.0	0.0	0.0
GYPC	2995	symbol	H. sapiens	2995	H. sapiens	GYPC	glycophorin C (Gerbich blood group)	GO:0050900 leukocyte migration;GO:0016477 cell migration;GO:0048870 cell motility		Blood group antigen proteins;CD markers	Cytosol;Vesicles(Approved)			(M5953)HALLMARK KRAS SIGNALING UP; (M5945)HALLMARK HEME METABOLISM	0.0	0.0	0.0	1.0	0.0	0.0	0.0	0.0	0.0	0.0	0.0	0.0	0.0	0.0	0.0	0.0	0.0	0.0	0.0	0.0
HAPLN3	145864	symbol	H. sapiens	145864	H. sapiens	HAPLN3	hyaluronan and proteoglycan link protein 3	GO:0001501 skeletal system development;GO:0007417 central nervous system development;GO:0007155 cell adhesion			Cytosol;Plasma membrane(Approved)	Hyaluronic acid (Hyaluronic acid binding)	(M5882)NABA PROTEOGLYCANS; (M5884)NABA CORE MATRISOME; (M5889)NABA MATRISOME		1.0	0.0	0.0	0.0	0.0	0.0	0.0	0.0	1.0	0.0	0.0	0.0	0.0	0.0	0.0	0.0	0.0	0.0	0.0	0.0
HAS2AS	594842	gene_synonym	H. sapiens	594842	H. sapiens	HAS2-AS1	HAS2 antisense RNA 1								0.0	0.0	0.0	0.0	0.0	0.0	0.0	0.0	0.0	0.0	0.0	0.0	0.0	0.0	0.0	0.0	0.0	0.0	0.0	0.0
HAS2	3037	symbol	H. sapiens	3037	H. sapiens	HAS2	hyaluronan synthase 2	GO:1900625 positive regulation of monocyte aggregation;GO:1900127 positive regulation of hyaluronan biosynthetic process;GO:0070295 renal water absorption		Enzymes/ENZYME proteins/Transferases	Nuclear speckles(Approved)			(M5942)HALLMARK UV RESPONSE DN; (M5932)HALLMARK INFLAMMATORY RESPONSE	1.0	1.0	0.0	1.0	0.0	0.0	1.0	1.0	1.0	1.0	0.0	0.0	0.0	1.0	0.0	0.0	1.0	1.0	0.0	0.0
HAVCR2	84868	symbol	H. sapiens	84868	H. sapiens	HAVCR2	hepatitis A virus cellular receptor 2	GO:0002859 negative regulation of natural killer cell mediated cytotoxicity directed against tumor cell target;GO:2001189 negative regulation of T cell activation via T cell receptor contact with antigen bound to MHC molecule on antigen presenting cell;GO:0071656 negative regulation of granulocyte colony-stimulating factor production							0.0	0.0	0.0	1.0	0.0	0.0	1.0	0.0	0.0	0.0	0.0	0.0	0.0	0.0	0.0	0.0	0.0	0.0	0.0	0.0
HCK	3055	symbol	H. sapiens	3055	H. sapiens	HCK	HCK proto-oncogene, Src family tyrosine kinase	GO:0002522 leukocyte migration involved in immune response;GO:0045728 respiratory burst after phagocytosis;GO:0038096 Fc-gamma receptor signaling pathway involved in phagocytosis	Tyr protein kinase family	Enzymes/{ENZYME proteins/Transferases,Kinases/Tyr protein kinases}	Nucleoplasm;Plasma membrane(Approved)	1-Ter-Butyl-3-P-Tolyl-1h-Pyrazolo[3,4-D]Pyrimidin-4-Ylamine (Receptor binding);Phosphonotyrosine (Receptor binding);Quercetin (Receptor binding);Bosutinib (Receptor binding)	(M33)PID GLYPICAN 1PATHWAY; (M252)PID IL8 CXCR1 PATHWAY; (M257)PID EPHRINB REV PATHWAY		0.0	0.0	0.0	1.0	0.0	0.0	0.0	1.0	0.0	0.0	0.0	0.0	0.0	1.0	1.0	0.0	0.0	0.0	0.0	0.0
HECW1	23072	symbol	H. sapiens	23072	H. sapiens	HECW1	HECT, C2 and WW domain containing E3 ubiquitin protein ligase 1	GO:2000650 negative regulation of sodium ion transmembrane transporter activity;GO:1902306 negative regulation of sodium ion transmembrane transport;GO:0010766 negative regulation of sodium ion transport		Enzymes/ENZYME proteins/Transferases	Cytosol(Supported)				0.0	0.0	0.0	0.0	0.0	0.0	0.0	0.0	0.0	0.0	0.0	0.0	0.0	1.0	0.0	0.0	0.0	0.0	0.0	0.0
HEG1	57493	symbol	H. sapiens	57493	H. sapiens	HEG1	heart development protein with EGF like domains 1	GO:2000299 negative regulation of Rho-dependent protein serine/threonine kinase activity;GO:0003222 ventricular trabecula myocardium morphogenesis;GO:0003017 lymph circulation			Vesicles(Approved)				0.0	1.0	0.0	0.0	0.0	0.0	0.0	0.0	0.0	1.0	0.0	0.0	1.0	1.0	0.0	0.0	1.0	0.0	0.0	1.0
HEY2	23493	symbol	H. sapiens	23493	H. sapiens	HEY2	hes related family bHLH transcription factor with YRPW motif 2	GO:2000723 negative regulation of cardiac vascular smooth muscle cell differentiation;GO:0003195 tricuspid valve formation;GO:0035910 ascending aorta morphogenesis		Transcription factors/Basic domains	Aggresome;Nuclear bodies(Approved)		(M288)PID HES HEY PATHWAY; (M19)PID P73PATHWAY	(M5919)HALLMARK HEDGEHOG SIGNALING; (M5895)HALLMARK WNT BETA CATENIN SIGNALING	0.0	1.0	0.0	0.0	0.0	0.0	0.0	0.0	0.0	0.0	0.0	1.0	1.0	1.0	0.0	0.0	1.0	1.0	0.0	1.0
HEYL	26508	symbol	H. sapiens	26508	H. sapiens	HEYL	hes related family bHLH transcription factor with YRPW motif like	GO:0060766 negative regulation of androgen receptor signaling pathway;GO:0072014 proximal tubule development;GO:0003184 pulmonary valve morphogenesis		Transcription factors/Basic domains	Cytosol;Mitochondria(Approved)			(M5903)HALLMARK NOTCH SIGNALING	0.0	0.0	0.0	0.0	0.0	0.0	0.0	1.0	0.0	0.0	0.0	0.0	1.0	1.0	0.0	0.0	1.0	1.0	1.0	0.0
HGF	3082	symbol	H. sapiens	3082	H. sapiens	HGF	hepatocyte growth factor	GO:1901299 negative regulation of hydrogen peroxide-mediated programmed cell death;GO:0060665 regulation of branching involved in salivary gland morphogenesis by mesenchymal-epithelial signaling;GO:1901298 regulation of hydrogen peroxide-mediated programmed cell death		Enzymes/Peptidases/Serine-type peptidases;RAS pathway related proteins	Centrosome;Cytosol(Approved)	O2-Sulfo-Glucuronic Acid (Serine-type endopeptidase activity);N,O6-Disulfo-Glucosamine (Serine-type endopeptidase activity);XL880 (Serine-type endopeptidase activity);ABT-510 (Serine-type endopeptidase activity)	(M86)PID ARF6 PATHWAY; (M232)PID ECADHERIN STABILIZATION PATHWAY; (M174)PID UPA UPAR PATHWAY	(M5902)HALLMARK APOPTOSIS	0.0	1.0	1.0	1.0	1.0	1.0	0.0	1.0	0.0	0.0	0.0	1.0	1.0	1.0	0.0	0.0	0.0	1.0	0.0	0.0
HHIPL1	84439	symbol	H. sapiens	84439	H. sapiens	HHIPL1	HHIP like 1	GO:0006897 endocytosis;GO:0098657 import into cell;GO:0016192 vesicle-mediated transport							0.0	0.0	0.0	0.0	0.0	0.0	0.0	0.0	0.0	0.0	0.0	0.0	0.0	0.0	0.0	0.0	0.0	0.0	0.0	0.0
HIC1	3090	symbol	H. sapiens	3090	H. sapiens	HIC1	HIC ZBTB transcriptional repressor 1	GO:0043517 positive regulation of DNA damage response, signal transduction by p53 class mediator;GO:1901798 positive regulation of signal transduction by p53 class mediator;GO:0043516 regulation of DNA damage response, signal transduction by p53 class mediator		Transcription factors/Zinc-coordinating DNA-binding domains	Cytosol;Nucleoplasm(Supported)		(M40)PID E2F PATHWAY; (M145)PID P53 DOWNSTREAM PATHWAY		0.0	0.0	0.0	0.0	0.0	0.0	0.0	0.0	0.0	0.0	0.0	0.0	0.0	0.0	0.0	0.0	0.0	0.0	0.0	0.0
HIP1	3092	symbol	H. sapiens	3092	H. sapiens	HIP1	huntingtin interacting protein 1	GO:2000588 positive regulation of platelet-derived growth factor receptor-beta signaling pathway;GO:0010641 positive regulation of platelet-derived growth factor receptor signaling pathway;GO:2000586 regulation of platelet-derived growth factor receptor-beta signaling pathway			Vesicles(Enhanced)		(M58)PID AR PATHWAY		0.0	0.0	0.0	0.0	0.0	0.0	0.0	1.0	0.0	0.0	0.0	0.0	0.0	0.0	1.0	0.0	0.0	0.0	0.0	0.0
HK3	3101	symbol	H. sapiens	3101	H. sapiens	HK3	hexokinase 3	GO:0061621 canonical glycolysis;GO:0061620 glycolytic process through glucose-6-phosphate;GO:0061615 glycolytic process through fructose-6-phosphate		Enzymes/ENZYME proteins/Transferases					0.0	0.0	0.0	0.0	0.0	0.0	0.0	0.0	0.0	0.0	0.0	0.0	0.0	0.0	0.0	0.0	0.0	0.0	0.0	0.0
HLX	3142	symbol	H. sapiens	3142	H. sapiens	HLX	H2.0 like homeobox	GO:0045629 negative regulation of T-helper 2 cell differentiation;GO:0045627 positive regulation of T-helper 1 cell differentiation;GO:0045625 regulation of T-helper 1 cell differentiation		Transcription factors/Helix-turn-helix domains	Cytosol;Nucleoplasm(Approved)		(M54)PID IL12 2PATHWAY		0.0	0.0	0.0	0.0	0.0	0.0	1.0	0.0	0.0	0.0	0.0	0.0	0.0	0.0	0.0	0.0	1.0	0.0	0.0	1.0
HMCN1	83872	symbol	H. sapiens	83872	H. sapiens	HMCN1	hemicentin 1	GO:0007157 heterophilic cell-cell adhesion via plasma membrane cell adhesion molecules;GO:0007156 homophilic cell adhesion via plasma membrane adhesion molecules;GO:0007601 visual perception					(M5887)NABA BASEMENT MEMBRANES; (M3008)NABA ECM GLYCOPROTEINS; (M5884)NABA CORE MATRISOME		1.0	0.0	0.0	0.0	0.0	1.0	0.0	0.0	0.0	0.0	0.0	0.0	0.0	0.0	0.0	0.0	0.0	0.0	0.0	0.0
HOXD8	3234	symbol	H. sapiens	3234	H. sapiens	HOXD8	homeobox D8	GO:0008595 anterior/posterior axis specification, embryo;GO:0007351 tripartite regional subdivision;GO:0007350 blastoderm segmentation		Transcription factors/Helix-turn-helix domains					0.0	0.0	0.0	0.0	0.0	0.0	0.0	0.0	1.0	0.0	0.0	0.0	0.0	0.0	0.0	0.0	0.0	0.0	0.0	0.0
HRH1	3269	symbol	H. sapiens	3269	H. sapiens	HRH1	histamine receptor H1	GO:0032962 positive regulation of inositol trisphosphate biosynthetic process;GO:0032960 regulation of inositol trisphosphate biosynthetic process;GO:0060732 positive regulation of inositol phosphate biosynthetic process		G-protein coupled receptors/GPCRs excl olfactory receptors	Plasma membrane(Supported)Cytosol(Approved)	Citalopram (Histamine receptor activity);Benzatropine (Histamine receptor activity);Ziprasidone (Histamine receptor activity);Clemastine (Histamine receptor activity);Amitriptyline (Histamine receptor activity);Olanzapine (Histamine receptor activity);Cetirizine (Histamine receptor activity);Terfenadine (Histamine receptor activity);Buclizine (Histamine receptor activity);Clozapine (Histamine rec…		(M5932)HALLMARK INFLAMMATORY RESPONSE	0.0	0.0	0.0	1.0	0.0	0.0	0.0	0.0	0.0	0.0	0.0	0.0	0.0	1.0	0.0	0.0	0.0	0.0	0.0	0.0
HRH2	3274	symbol	H. sapiens	3274	H. sapiens	HRH2	histamine receptor H2	GO:0001697 histamine-induced gastric acid secretion;GO:0001698 gastrin-induced gastric acid secretion;GO:0045907 positive regulation of vasoconstriction		G-protein coupled receptors/GPCRs excl olfactory receptors		Betazole (Histamine receptor activity);Amitriptyline (Histamine receptor activity);Olanzapine (Histamine receptor activity);Loxapine (Histamine receptor activity);Cimetidine (Histamine receptor activity);Nizatidine (Histamine receptor activity);Histamine Phosphate (Histamine receptor activity);Epinastine (Histamine receptor activity);Tolazoline (Histamine receptor activity);Ranitidine (Histamine …			0.0	0.0	0.0	0.0	0.0	0.0	0.0	0.0	0.0	0.0	0.0	0.0	0.0	1.0	0.0	0.0	0.0	0.0	0.0	0.0
HSD11B1	3290	symbol	H. sapiens	3290	H. sapiens	HSD11B1	hydroxysteroid 11-beta dehydrogenase 1	GO:0006704 glucocorticoid biosynthetic process;GO:0008211 glucocorticoid metabolic process;GO:0042446 hormone biosynthetic process		Enzymes/ENZYME proteins/Oxidoreductases		NADH (11-beta-hydroxysteroid dehydrogenase [nad(p)] activity);Prednisone (11-beta-hydroxysteroid dehydrogenase [nad(p)] activity);Carbenoxolone (11-beta-hydroxysteroid dehydrogenase [nad(p)] activity);2'-Monophosphoadenosine 5'-Diphosphoribose (11-beta-hydroxysteroid dehydrogenase [nad(p)] activity);2-(N-Morpholino)-Ethanesulfonic Acid (11-beta-hydroxysteroid dehydrogenase [nad(p)] activity);(11-…		(M5953)HALLMARK KRAS SIGNALING UP; (M5934)HALLMARK XENOBIOTIC METABOLISM	0.0	0.0	0.0	0.0	0.0	0.0	0.0	0.0	0.0	0.0	0.0	0.0	0.0	0.0	0.0	0.0	0.0	0.0	0.0	0.0
HSPA12A	259217	symbol	H. sapiens	259217	H. sapiens	HSPA12A	heat shock protein family A (Hsp70) member 12A	GO:0008150 biological_process			Cytosol;Golgi apparatus(Approved)				0.0	0.0	0.0	0.0	0.0	0.0	0.0	0.0	0.0	0.0	0.0	0.0	0.0	0.0	0.0	0.0	0.0	0.0	0.0	0.0
HSPA12B	116835	symbol	H. sapiens	116835	H. sapiens	HSPA12B	heat shock protein family A (Hsp70) member 12B								0.0	0.0	0.0	0.0	0.0	0.0	0.0	0.0	0.0	0.0	0.0	0.0	0.0	0.0	0.0	0.0	0.0	0.0	0.0	0.0
HSPB2	3316	symbol	H. sapiens	3316	H. sapiens	HSPB2	heat shock protein family B (small) member 2	GO:0006986 response to unfolded protein;GO:0035966 response to topologically incorrect protein;GO:0043085 positive regulation of catalytic activity						(M5909)HALLMARK MYOGENESIS	0.0	0.0	0.0	0.0	0.0	0.0	0.0	0.0	0.0	0.0	0.0	0.0	0.0	0.0	0.0	0.0	0.0	0.0	0.0	0.0
HSPG2	3339	symbol	H. sapiens	3339	H. sapiens	HSPG2	heparan sulfate proteoglycan 2	GO:0016525 negative regulation of angiogenesis;GO:0001523 retinoid metabolic process;GO:0006027 glycosaminoglycan catabolic process			Cytosol;Nucleoplasm;Plasma membrane(Approved)	Palifermin (Protein c-terminus binding)	(M5882)NABA PROTEOGLYCANS; (M5887)NABA BASEMENT MEMBRANES; (M5884)NABA CORE MATRISOME		1.0	1.0	1.0	0.0	0.0	1.0	1.0	0.0	0.0	0.0	0.0	0.0	0.0	1.0	0.0	0.0	0.0	0.0	0.0	0.0
HTR1B	3351	symbol	H. sapiens	3351	H. sapiens	HTR1B	5-hydroxytryptamine receptor 1B	GO:0014063 negative regulation of serotonin secretion;GO:0032229 negative regulation of synaptic transmission, GABAergic;GO:0051967 negative regulation of synaptic transmission, glutamatergic		G-protein coupled receptors/{GPCRs excl olfactory receptors,Serotonin receptors};Transporters	Plasma membrane(Uncertain)	Eletriptan (Serotonin receptor activity);Ziprasidone (Serotonin receptor activity);Methysergide (Serotonin receptor activity);Cabergoline (Serotonin receptor activity);Ropinirole (Serotonin receptor activity);Zolmitriptan (Serotonin receptor activity);Dihydroergotamine (Serotonin receptor activity);Amitriptyline (Serotonin receptor activity);Olanzapine (Serotonin receptor activity);Clozapine (Ser…		(M5956)HALLMARK KRAS SIGNALING DN	0.0	0.0	0.0	0.0	0.0	0.0	0.0	0.0	0.0	0.0	0.0	0.0	0.0	1.0	0.0	0.0	0.0	0.0	0.0	0.0
HTR2A	3356	symbol	H. sapiens	3356	H. sapiens	HTR2A	5-hydroxytryptamine receptor 2A	GO:0045821 positive regulation of glycolytic process;GO:0014824 artery smooth muscle contraction;GO:0010513 positive regulation of phosphatidylinositol biosynthetic process		G-protein coupled receptors/{GPCRs excl olfactory receptors,Serotonin receptors}		Ziprasidone (Virus receptor activity);Methysergide (Virus receptor activity);Cabergoline (Virus receptor activity);Ropinirole (Virus receptor activity);Amitriptyline (Virus receptor activity);Olanzapine (Virus receptor activity);Clozapine (Virus receptor activity);Mirtazapine (Virus receptor activity);Loxapine (Virus receptor activity);Remoxipride (Virus receptor activity);Pramipexole (Virus rece…			0.0	0.0	0.0	0.0	0.0	0.0	0.0	0.0	0.0	0.0	0.0	0.0	0.0	1.0	0.0	0.0	0.0	0.0	0.0	0.0
HTRA1	5654	symbol	H. sapiens	5654	H. sapiens	HTRA1	HtrA serine peptidase 1	GO:0097187 dentinogenesis;GO:0060718 chorionic trophoblast cell differentiation;GO:0050687 negative regulation of defense response to virus		Enzymes/Peptidases/Serine-type peptidases	Plasma membrane(Supported)		(M3468)NABA ECM REGULATORS; (M5885)NABA MATRISOME ASSOCIATED; (M5889)NABA MATRISOME	(M5946)HALLMARK COAGULATION; (M5930)HALLMARK EPITHELIAL MESENCHYMAL TRANSITION	1.0	1.0	1.0	0.0	1.0	0.0	0.0	1.0	0.0	0.0	0.0	0.0	0.0	0.0	0.0	0.0	0.0	0.0	1.0	0.0
HTRA3	94031	symbol	H. sapiens	94031	H. sapiens	HTRA3	HtrA serine peptidase 3	GO:0030514 negative regulation of BMP signaling pathway;GO:0030512 negative regulation of transforming growth factor beta receptor signaling pathway;GO:1903845 negative regulation of cellular response to transforming growth factor beta stimulus		Enzymes/Peptidases/Serine-type peptidases	Vesicles(Approved)		(M3468)NABA ECM REGULATORS; (M5885)NABA MATRISOME ASSOCIATED; (M5889)NABA MATRISOME		0.0	0.0	0.0	0.0	1.0	0.0	0.0	1.0	0.0	0.0	0.0	0.0	0.0	0.0	0.0	0.0	0.0	0.0	1.0	0.0
IBSP	3381	symbol	H. sapiens	3381	H. sapiens	IBSP	integrin binding sialoprotein	GO:0030282 bone mineralization;GO:0031214 biomineral tissue development;GO:0001649 osteoblast differentiation					(M53)PID INTEGRIN3 PATHWAY; (M3008)NABA ECM GLYCOPROTEINS; (M5884)NABA CORE MATRISOME		1.0	0.0	0.0	0.0	0.0	1.0	1.0	1.0	0.0	0.0	0.0	1.0	0.0	0.0	0.0	1.0	0.0	0.0	0.0	0.0
ICAM1	3383	symbol	H. sapiens	3383	H. sapiens	ICAM1	intercellular adhesion molecule 1	GO:0097368 establishment of Sertoli cell barrier;GO:0046813 receptor-mediated virion attachment to host cell;GO:0045907 positive regulation of vasoconstriction		CD markers	Cytosol;Plasma membrane(Uncertain)	Natalizumab (Virus receptor activity);Hyaluronic acid (Virus receptor activity)	(M169)PID INTEGRIN2 PATHWAY; (M159)PID AMB2 NEUTROPHILS PATHWAY; (M99)PID TXA2PATHWAY	(M5941)HALLMARK UV RESPONSE UP; (M5950)HALLMARK ALLOGRAFT REJECTION; (M5915)HALLMARK APICAL JUNCTION	1.0	0.0	0.0	1.0	0.0	1.0	1.0	0.0	0.0	0.0	0.0	0.0	0.0	1.0	1.0	0.0	0.0	0.0	0.0	0.0
ICAM5	7087	symbol	H. sapiens	7087	H. sapiens	ICAM5	intercellular adhesion molecule 5	GO:0006909 phagocytosis;GO:0030198 extracellular matrix organization;GO:0043062 extracellular structure organization						(M5915)HALLMARK APICAL JUNCTION	1.0	0.0	0.0	0.0	0.0	1.0	0.0	0.0	0.0	0.0	0.0	0.0	0.0	0.0	0.0	0.0	0.0	0.0	0.0	0.0
IFFO1	25900	symbol	H. sapiens	25900	H. sapiens	IFFO1	intermediate filament family orphan 1								0.0	0.0	0.0	0.0	0.0	0.0	0.0	0.0	0.0	0.0	0.0	0.0	0.0	0.0	0.0	0.0	0.0	0.0	0.0	0.0
IGDCC4	57722	symbol	H. sapiens	57722	H. sapiens	IGDCC4	immunoglobulin superfamily DCC subclass member 4				Cytosol;Nucleoplasm(Approved)				0.0	0.0	0.0	0.0	0.0	0.0	0.0	0.0	0.0	0.0	0.0	0.0	0.0	0.0	0.0	0.0	0.0	0.0	0.0	0.0
IGF1R	3480	symbol	H. sapiens	3480	H. sapiens	IGF1R	insulin like growth factor 1 receptor	GO:0051389 inactivation of MAPKK activity;GO:0097062 dendritic spine maintenance;GO:0014068 positive regulation of phosphatidylinositol 3-kinase signaling	Tyr protein kinase family	CD markers;Enzymes/{ENZYME proteins/Transferases,Kinases/Tyr protein kinases};RAS pathway related proteins	Vesicles(Uncertain)	Insulin Human (Protein tyrosine kinase activity);Insulin Lispro (Protein tyrosine kinase activity);Insulin Glargine (Protein tyrosine kinase activity);Insulin Pork (Protein tyrosine kinase activity);Mecasermin (Protein tyrosine kinase activity);Phosphoaminophosphonic Acid-Adenylate Ester (Protein tyrosine kinase activity);ATL1101 (Protein tyrosine kinase activity);XL228 (Protein tyrosine kinase a…	(M125)PID IGF1 PATHWAY; (M41)PID ER NONGENOMIC PATHWAY; (M232)PID ECADHERIN STABILIZATION PATHWAY	(M5942)HALLMARK UV RESPONSE DN; (M5947)HALLMARK IL2 STAT5 SIGNALING; (M5906)HALLMARK ESTROGEN RESPONSE EARLY	0.0	0.0	1.0	1.0	1.0	1.0	0.0	1.0	0.0	0.0	0.0	0.0	0.0	0.0	0.0	0.0	0.0	0.0	0.0	0.0
IGF2AS	51214	gene_synonym	H. sapiens	51214	H. sapiens	IGF2-AS	IGF2 antisense RNA								0.0	0.0	0.0	0.0	0.0	0.0	0.0	0.0	0.0	0.0	0.0	0.0	0.0	0.0	0.0	0.0	0.0	0.0	0.0	0.0
IGF2	3481	symbol	H. sapiens	3481	H. sapiens	IGF2	insulin like growth factor 2	GO:0038028 insulin receptor signaling pathway via phosphatidylinositol 3-kinase;GO:0045725 positive regulation of glycogen biosynthetic process;GO:0046628 positive regulation of insulin receptor signaling pathway			Nucleoplasm;Vesicles(Approved)		(M142)PID AJDISS 2PATHWAY; (M5883)NABA SECRETED FACTORS; (M5885)NABA MATRISOME ASSOCIATED	(M5953)HALLMARK KRAS SIGNALING UP	0.0	0.0	0.0	0.0	1.0	1.0	1.0	1.0	1.0	0.0	0.0	1.0	0.0	0.0	1.0	0.0	1.0	0.0	0.0	1.0
IGFBP7	3490	symbol	H. sapiens	3490	H. sapiens	IGFBP7	insulin like growth factor binding protein 7	GO:0051414 response to cortisol;GO:0007566 embryo implantation;GO:0050810 regulation of steroid biosynthetic process			Golgi apparatus(Uncertain)	Insulin Human;Insulin Pork	(M3008)NABA ECM GLYCOPROTEINS; (M5884)NABA CORE MATRISOME; (M5889)NABA MATRISOME	(M5909)HALLMARK MYOGENESIS	1.0	0.0	0.0	0.0	0.0	0.0	0.0	0.0	0.0	0.0	0.0	0.0	0.0	1.0	0.0	0.0	0.0	0.0	0.0	0.0
IGFL3	388555	symbol	H. sapiens	388555	H. sapiens	IGFL3	IGF like family member 3	GO:0008150 biological_process							0.0	0.0	0.0	0.0	0.0	0.0	0.0	0.0	0.0	0.0	0.0	0.0	0.0	0.0	0.0	0.0	0.0	0.0	0.0	0.0
IGSF21	84966	symbol	H. sapiens	84966	H. sapiens	IGSF21	immunoglobin superfamily member 21	GO:0007157 heterophilic cell-cell adhesion via plasma membrane cell adhesion molecules;GO:0060074 synapse maturation;GO:0007156 homophilic cell adhesion via plasma membrane adhesion molecules							0.0	0.0	0.0	0.0	0.0	0.0	0.0	0.0	0.0	0.0	0.0	0.0	0.0	0.0	0.0	0.0	0.0	0.0	0.0	0.0
IGSF6	10261	symbol	H. sapiens	10261	H. sapiens	IGSF6	immunoglobulin superfamily member 6	GO:0006955 immune response;GO:0007166 cell surface receptor signaling pathway;GO:0002376 immune system process						(M5950)HALLMARK ALLOGRAFT REJECTION	0.0	0.0	0.0	0.0	0.0	0.0	0.0	0.0	0.0	0.0	0.0	0.0	0.0	0.0	0.0	0.0	0.0	0.0	0.0	0.0
IKBIP	121457	symbol	H. sapiens	121457	H. sapiens	IKBIP	IKBKB interacting protein	GO:0010165 response to X-ray;GO:0010212 response to ionizing radiation;GO:0009314 response to radiation			Endoplasmic reticulum(Enhanced)				0.0	0.0	0.0	0.0	0.0	0.0	0.0	0.0	0.0	0.0	0.0	0.0	0.0	0.0	0.0	0.0	0.0	0.0	0.0	0.0
IL10	3586	symbol	H. sapiens	3586	H. sapiens	IL10	interleukin 10	GO:0045355 negative regulation of interferon-alpha biosynthetic process;GO:0002875 negative regulation of chronic inflammatory response to antigenic stimulus;GO:1903208 negative regulation of hydrogen peroxide-induced neuron death				AV411 (Interleukin-10 receptor binding);CRx-139 (Interleukin-10 receptor binding);LLL-3348 (Interleukin-10 receptor binding)	(M28)PID IL4 2PATHWAY; (M167)PID AP1 PATHWAY; (M2)PID SMAD2 3NUCLEAR PATHWAY	(M5947)HALLMARK IL2 STAT5 SIGNALING; (M5950)HALLMARK ALLOGRAFT REJECTION; (M5932)HALLMARK INFLAMMATORY RESPONSE	0.0	1.0	0.0	1.0	1.0	1.0	1.0	1.0	0.0	1.0	0.0	0.0	1.0	0.0	0.0	0.0	0.0	0.0	0.0	1.0
IL11	3589	symbol	H. sapiens	3589	H. sapiens	IL11	interleukin 11	GO:2000352 negative regulation of endothelial cell apoptotic process;GO:1903659 regulation of complement-dependent cytotoxicity;GO:1904036 negative regulation of epithelial cell apoptotic process			Mitochondria(Uncertain)		(M5883)NABA SECRETED FACTORS; (M5885)NABA MATRISOME ASSOCIATED; (M5889)NABA MATRISOME	(M5950)HALLMARK ALLOGRAFT REJECTION	0.0	0.0	0.0	0.0	1.0	0.0	0.0	0.0	0.0	0.0	0.0	0.0	0.0	0.0	0.0	0.0	0.0	0.0	0.0	0.0
IL1R1	3554	symbol	H. sapiens	3554	H. sapiens	IL1R1	interleukin 1 receptor type 1	GO:2000556 positive regulation of T-helper 1 cell cytokine production;GO:2000661 positive regulation of interleukin-1-mediated signaling pathway;GO:2000554 regulation of T-helper 1 cell cytokine production		CD markers		Anakinra (Transmembrane signaling receptor activity);SD118 (Transmembrane signaling receptor activity);OMS-103HP (Transmembrane signaling receptor activity)	(M110)PID IL1 PATHWAY; (M12012)ST P38 MAPK PATHWAY; (M3721)ST JNK MAPK PATHWAY	(M5897)HALLMARK IL6 JAK STAT3 SIGNALING; (M5932)HALLMARK INFLAMMATORY RESPONSE; (M5934)HALLMARK XENOBIOTIC METABOLISM	0.0	0.0	0.0	1.0	0.0	1.0	0.0	0.0	0.0	0.0	0.0	0.0	0.0	0.0	0.0	0.0	0.0	0.0	0.0	0.0
IL24	11009	symbol	H. sapiens	11009	H. sapiens	IL24	interleukin 24	GO:0042531 positive regulation of tyrosine phosphorylation of STAT protein;GO:0042501 serine phosphorylation of STAT protein;GO:0071353 cellular response to interleukin-4					(M196)PID IL23 PATHWAY; (M5883)NABA SECRETED FACTORS; (M5885)NABA MATRISOME ASSOCIATED		0.0	0.0	0.0	0.0	1.0	0.0	0.0	0.0	0.0	1.0	0.0	0.0	0.0	0.0	0.0	0.0	0.0	0.0	0.0	0.0
IL2RA	3559	symbol	H. sapiens	3559	H. sapiens	IL2RA	interleukin 2 receptor subunit alpha	GO:0046013 regulation of T cell homeostatic proliferation;GO:0001777 T cell homeostatic proliferation;GO:0042104 positive regulation of activated T cell proliferation		CD markers		Denileukin diftitox (Interleukin-2 receptor activity);Aldesleukin (Interleukin-2 receptor activity);Basiliximab (Interleukin-2 receptor activity);Daclizumab (Interleukin-2 receptor activity)	(M235)PID TCR CALCIUM PATHWAY; (M234)PID IL2 STAT5 PATHWAY; (M290)PID IL12 STAT4 PATHWAY	(M5897)HALLMARK IL6 JAK STAT3 SIGNALING; (M5947)HALLMARK IL2 STAT5 SIGNALING; (M5950)HALLMARK ALLOGRAFT REJECTION	0.0	0.0	0.0	0.0	0.0	1.0	1.0	0.0	0.0	0.0	0.0	0.0	0.0	0.0	0.0	0.0	0.0	0.0	0.0	0.0
IL31RA	133396	symbol	H. sapiens	133396	H. sapiens	IL31RA	interleukin 31 receptor A	GO:0043031 negative regulation of macrophage activation;GO:0030224 monocyte differentiation;GO:0042531 positive regulation of tyrosine phosphorylation of STAT protein			Nucleoplasm;Vesicles(Approved)				0.0	0.0	0.0	0.0	0.0	0.0	0.0	1.0	0.0	0.0	0.0	0.0	0.0	0.0	0.0	0.0	0.0	0.0	0.0	0.0
IL32	9235	symbol	H. sapiens	9235	H. sapiens	IL32	interleukin 32	GO:0019221 cytokine-mediated signaling pathway;GO:0071345 cellular response to cytokine stimulus;GO:0034097 response to cytokine						(M5930)HALLMARK EPITHELIAL MESENCHYMAL TRANSITION	0.0	0.0	0.0	0.0	0.0	0.0	0.0	0.0	0.0	0.0	0.0	0.0	0.0	0.0	0.0	0.0	0.0	0.0	0.0	0.0
IL4I1	259307	symbol	H. sapiens	259307	H. sapiens	IL4I1	interleukin 4 induced 1	GO:0006559 L-phenylalanine catabolic process;GO:1902222 erythrose 4-phosphate/phosphoenolpyruvate family amino acid catabolic process;GO:0006558 L-phenylalanine metabolic process		Enzymes/ENZYME proteins/Oxidoreductases		Flavin adenine dinucleotide (L-amino-acid oxidase activity);Vinylglycine (L-amino-acid oxidase activity);2-Aminobenzoic Acid (L-amino-acid oxidase activity);Citric Acid (L-amino-acid oxidase activity)		(M5935)HALLMARK FATTY ACID METABOLISM	0.0	0.0	0.0	0.0	0.0	0.0	0.0	0.0	0.0	0.0	0.0	0.0	0.0	0.0	0.0	0.0	0.0	0.0	0.0	0.0
IL6	3569	symbol	H. sapiens	3569	H. sapiens	IL6	interleukin 6	GO:0072540 T-helper 17 cell lineage commitment;GO:0002295 T-helper cell lineage commitment;GO:2000553 positive regulation of T-helper 2 cell cytokine production			Vesicles(Approved)	Ginseng (Interleukin-6 receptor binding);YSIL6 (Interleukin-6 receptor binding);AV411 (Interleukin-6 receptor binding);681323 (Interleukin-6 receptor binding);VX-702 (Interleukin-6 receptor binding);CRx-139 (Interleukin-6 receptor binding);HMPL-004 (Interleukin-6 receptor binding);Siltuximab (Interleukin-6 receptor binding)	(M9174)ST STAT3 PATHWAY; (M36)PID IL27 PATHWAY; (M65)PID FRA PATHWAY	(M5897)HALLMARK IL6 JAK STAT3 SIGNALING; (M5941)HALLMARK UV RESPONSE UP; (M5902)HALLMARK APOPTOSIS	1.0	1.0	0.0	1.0	1.0	1.0	1.0	0.0	0.0	1.0	0.0	1.0	0.0	1.0	0.0	0.0	0.0	1.0	0.0	0.0
IL7R	3575	symbol	H. sapiens	3575	H. sapiens	IL7R	interleukin 7 receptor	GO:0001915 negative regulation of T cell mediated cytotoxicity;GO:0033089 positive regulation of T cell differentiation in thymus;GO:0070233 negative regulation of T cell apoptotic process		CD markers	Plasma membrane(Supported)Microtubule organizing center(Uncertain)			(M5890)HALLMARK TNFA SIGNALING VIA NFKB; (M5953)HALLMARK KRAS SIGNALING UP; (M5932)HALLMARK INFLAMMATORY RESPONSE	0.0	0.0	0.0	0.0	0.0	1.0	1.0	0.0	0.0	0.0	0.0	0.0	0.0	1.0	0.0	0.0	0.0	0.0	0.0	0.0
IL8	3576	gene_synonym	H. sapiens	3576	H. sapiens	CXCL8	C-X-C motif chemokine ligand 8	GO:2000535 regulation of entry of bacterium into host cell;GO:0045091 regulation of single stranded viral RNA replication via double stranded DNA intermediate;GO:0090023 positive regulation of neutrophil chemotaxis				ABT-510 (Interleukin-8 receptor binding);MDX-018 (Interleukin-8 receptor binding);Rivanicline (Interleukin-8 receptor binding)	(M251)PID SYNDECAN 3 PATHWAY; (M252)PID IL8 CXCR1 PATHWAY; (M240)PID SYNDECAN 2 PATHWAY	(M5930)HALLMARK EPITHELIAL MESENCHYMAL TRANSITION; (M5932)HALLMARK INFLAMMATORY RESPONSE	0.0	1.0	0.0	1.0	1.0	1.0	1.0	1.0	0.0	0.0	0.0	0.0	0.0	0.0	0.0	0.0	0.0	0.0	0.0	1.0
ILK	3611	symbol	H. sapiens	3611	H. sapiens	ILK	integrin linked kinase	GO:0001658 branching involved in ureteric bud morphogenesis;GO:0060675 ureteric bud morphogenesis;GO:0045773 positive regulation of axon extension	TKL Ser/Thr protein kinase family	Enzymes/{ENZYME proteins/Transferases,Kinases/TKL Ser/Thr protein kinases}	Cell Junctions;Focal adhesion sites(Enhanced)		(M12771)SA PTEN PATHWAY; (M63)PID AVB3 OPN PATHWAY; (M71)PID ILK PATHWAY		0.0	1.0	1.0	1.0	0.0	1.0	1.0	1.0	0.0	1.0	0.0	1.0	1.0	1.0	1.0	0.0	1.0	0.0	1.0	0.0
INHBA	3624	symbol	H. sapiens	3624	H. sapiens	INHBA	inhibin subunit beta A	GO:0046882 negative regulation of follicle-stimulating hormone secretion;GO:0046881 positive regulation of follicle-stimulating hormone secretion;GO:0021773 striatal medium spiny neuron differentiation					(M185)PID ALK1 PATHWAY; (M5883)NABA SECRETED FACTORS; (M5885)NABA MATRISOME ASSOCIATED	(M5950)HALLMARK ALLOGRAFT REJECTION; (M5930)HALLMARK EPITHELIAL MESENCHYMAL TRANSITION; (M5953)HALLMARK KRAS SIGNALING UP	0.0	0.0	0.0	0.0	1.0	0.0	0.0	0.0	0.0	1.0	0.0	0.0	1.0	1.0	0.0	0.0	0.0	0.0	1.0	1.0
IQSEC1	9922	symbol	H. sapiens	9922	H. sapiens	IQSEC1	IQ motif and Sec7 domain 1	GO:0051549 positive regulation of keratinocyte migration;GO:0051547 regulation of keratinocyte migration;GO:0051546 keratinocyte migration			Nucleoli;Vesicles(Approved)		(M86)PID ARF6 PATHWAY		0.0	1.0	0.0	1.0	0.0	0.0	0.0	0.0	0.0	0.0	0.0	0.0	0.0	0.0	1.0	0.0	0.0	0.0	0.0	0.0
ISLR2	57611	symbol	H. sapiens	57611	H. sapiens	ISLR2	immunoglobulin superfamily containing leucine rich repeat 2	GO:0045773 positive regulation of axon extension;GO:0050772 positive regulation of axonogenesis;GO:0030516 regulation of axon extension							0.0	0.0	0.0	0.0	0.0	0.0	0.0	0.0	0.0	0.0	0.0	0.0	0.0	1.0	0.0	0.0	0.0	0.0	0.0	0.0
ISLR	3671	symbol	H. sapiens	3671	H. sapiens	ISLR	immunoglobulin superfamily containing leucine rich repeat	GO:0002576 platelet degranulation;GO:0045055 regulated exocytosis;GO:0006887 exocytosis			Golgi apparatus;Plasma membrane(Approved)				0.0	0.0	0.0	0.0	0.0	0.0	0.0	0.0	0.0	0.0	0.0	0.0	0.0	0.0	0.0	0.0	0.0	0.0	0.0	0.0
ITGA11	22801	symbol	H. sapiens	22801	H. sapiens	ITGA11	integrin subunit alpha 11	GO:0038065 collagen-activated signaling pathway;GO:0006929 substrate-dependent cell migration;GO:0033627 cell adhesion mediated by integrin					(M47)PID INTEGRIN CS PATHWAY; (M67)PID ARF6 TRAFFICKING PATHWAY; (M18)PID INTEGRIN1 PATHWAY		1.0	0.0	0.0	0.0	0.0	1.0	1.0	0.0	0.0	0.0	0.0	1.0	0.0	0.0	0.0	0.0	1.0	0.0	0.0	0.0
ITGA1	3672	symbol	H. sapiens	3672	H. sapiens	ITGA1	integrin subunit alpha 1	GO:0032516 positive regulation of phosphoprotein phosphatase activity;GO:0042311 vasodilation;GO:0042059 negative regulation of epidermal growth factor receptor signaling pathway		CD markers;Transporters/Accessory Factors Involved in Transport			(M11)PID PRL SIGNALING EVENTS PATHWAY; (M274)PID LYMPH ANGIOGENESIS PATHWAY; (M47)PID INTEGRIN CS PATHWAY		1.0	0.0	0.0	1.0	0.0	1.0	1.0	1.0	0.0	0.0	0.0	0.0	0.0	1.0	0.0	0.0	0.0	0.0	0.0	0.0
ITGA4	3676	symbol	H. sapiens	3676	H. sapiens	ITGA4	integrin subunit alpha 4	GO:1903238 positive regulation of leukocyte tethering or rolling;GO:1990771 clathrin-dependent extracellular exosome endocytosis;GO:0003366 cell-matrix adhesion involved in ameboidal cell migration		CD markers	Plasma membrane(Approved)	Natalizumab (Metal ion binding);ATL1102 (Metal ion binding);CDP323 (Metal ion binding);R1295 (Metal ion binding);R411 (Metal ion binding);MLN-02 (Metal ion binding);Tinzaparin (Metal ion binding);Vedolizumab (Metal ion binding)	(M212)PID INTEGRIN5 PATHWAY; (M274)PID LYMPH ANGIOGENESIS PATHWAY; (M47)PID INTEGRIN CS PATHWAY	(M5897)HALLMARK IL6 JAK STAT3 SIGNALING	1.0	1.0	0.0	1.0	0.0	1.0	1.0	0.0	0.0	0.0	0.0	0.0	0.0	1.0	0.0	1.0	0.0	0.0	0.0	1.0
ITGA5	3678	symbol	H. sapiens	3678	H. sapiens	ITGA5	integrin subunit alpha 5	GO:0035313 wound healing, spreading of epidermal cells;GO:1903672 positive regulation of sprouting angiogenesis;GO:0030949 positive regulation of vascular endothelial growth factor receptor signaling pathway		CD markers			(M274)PID LYMPH ANGIOGENESIS PATHWAY; (M47)PID INTEGRIN CS PATHWAY; (M165)PID SYNDECAN 4 PATHWAY	(M5930)HALLMARK EPITHELIAL MESENCHYMAL TRANSITION; (M5932)HALLMARK INFLAMMATORY RESPONSE	1.0	1.0	0.0	1.0	0.0	1.0	1.0	1.0	0.0	1.0	0.0	0.0	1.0	0.0	0.0	0.0	0.0	0.0	1.0	1.0
ITGAV	3685	symbol	H. sapiens	3685	H. sapiens	ITGAV	integrin subunit alpha V	GO:0052066 entry of symbiont into host cell by promotion of host phagocytosis;GO:0052191 positive regulation by symbiont of host phagocytosis;GO:0052370 entry of organism into cell of other organism by promotion of phagocytosis in other organism involved in symbiotic interaction		CD markers;Transporters/Accessory Factors Involved in Transport	Focal adhesion sites(Supported)Cytosol(Uncertain)	Anti-thymocyte Globulin (Rabbit) (Voltage-gated calcium channel activity)	(M212)PID INTEGRIN5 PATHWAY; (M103)PID S1P S1P1 PATHWAY; (M206)PID PDGFRA PATHWAY	(M5944)HALLMARK ANGIOGENESIS; (M5908)HALLMARK ANDROGEN RESPONSE; (M5947)HALLMARK IL2 STAT5 SIGNALING	1.0	1.0	1.0	1.0	0.0	1.0	1.0	1.0	0.0	0.0	0.0	0.0	0.0	1.0	0.0	1.0	0.0	0.0	0.0	1.0
ITGAX	3687	symbol	H. sapiens	3687	H. sapiens	ITGAX	integrin subunit alpha X	GO:1905956 positive regulation of endothelial tube morphogenesis;GO:1901509 regulation of endothelial tube morphogenesis;GO:0031643 positive regulation of myelination		CD markers			(M47)PID INTEGRIN CS PATHWAY; (M169)PID INTEGRIN2 PATHWAY		1.0	1.0	0.0	1.0	0.0	1.0	0.0	0.0	0.0	0.0	0.0	0.0	1.0	1.0	0.0	0.0	0.0	0.0	0.0	0.0
ITGB1	3688	symbol	H. sapiens	3688	H. sapiens	ITGB1	integrin subunit beta 1	GO:0021943 formation of radial glial scaffolds;GO:0007161 calcium-independent cell-matrix adhesion;GO:0021932 hindbrain radial glia guided cell migration		CD markers;Transporters	Focal adhesion sites;Plasma membrane(Supported)Endoplasmic reticulum(Approved)	Anti-thymocyte Globulin (Rabbit) (Virus receptor activity)	(M11)PID PRL SIGNALING EVENTS PATHWAY; (M274)PID LYMPH ANGIOGENESIS PATHWAY; (M118)PID INTEGRIN A9B1 PATHWAY	(M5930)HALLMARK EPITHELIAL MESENCHYMAL TRANSITION; (M5909)HALLMARK MYOGENESIS; (M5915)HALLMARK APICAL JUNCTION	1.0	1.0	0.0	1.0	1.0	1.0	1.0	1.0	0.0	0.0	0.0	0.0	1.0	1.0	1.0	0.0	1.0	0.0	1.0	1.0
ITGB2	3689	symbol	H. sapiens	3689	H. sapiens	ITGB2	integrin subunit beta 2	GO:0043315 positive regulation of neutrophil degranulation;GO:0045963 negative regulation of dopamine metabolic process;GO:2000363 positive regulation of prostaglandin-E synthase activity		CD markers	Plasma membrane(Approved)	Simvastatin (Protein kinase binding)	(M47)PID INTEGRIN CS PATHWAY; (M169)PID INTEGRIN2 PATHWAY; (M159)PID AMB2 NEUTROPHILS PATHWAY	(M5950)HALLMARK ALLOGRAFT REJECTION; (M5953)HALLMARK KRAS SIGNALING UP; (M5924)HALLMARK MTORC1 SIGNALING	1.0	1.0	0.0	1.0	0.0	1.0	1.0	0.0	0.0	0.0	0.0	0.0	0.0	0.0	0.0	0.0	0.0	0.0	0.0	1.0
ITGB3	3690	symbol	H. sapiens	3690	H. sapiens	ITGB3	integrin subunit beta 3	GO:0045715 negative regulation of low-density lipoprotein particle receptor biosynthetic process;GO:0051611 regulation of serotonin uptake;GO:0099149 regulation of postsynaptic neurotransmitter receptor internalization		CD markers		Abciximab (Virus receptor activity);Eptifibatide (Virus receptor activity);Anti-thymocyte Globulin (Rabbit) (Virus receptor activity);Tirofiban (Virus receptor activity);Lefradafiban (Virus receptor activity);LM-609 (Virus receptor activity)	(M103)PID S1P S1P1 PATHWAY; (M47)PID INTEGRIN CS PATHWAY; (M55)PID S1P S1P3 PATHWAY	(M5897)HALLMARK IL6 JAK STAT3 SIGNALING; (M5946)HALLMARK COAGULATION; (M5942)HALLMARK UV RESPONSE DN	1.0	1.0	1.0	1.0	0.0	1.0	1.0	1.0	0.0	1.0	0.0	0.0	1.0	1.0	0.0	1.0	0.0	0.0	1.0	1.0
ITGB5	3693	symbol	H. sapiens	3693	H. sapiens	ITGB5	integrin subunit beta 5	GO:0002479 antigen processing and presentation of exogenous peptide antigen via MHC class I, TAP-dependent;GO:0046718 viral entry into host cell;GO:0042590 antigen processing and presentation of exogenous peptide antigen via MHC class I			Mitochondria;Plasma membrane(Approved)		(M212)PID INTEGRIN5 PATHWAY; (M47)PID INTEGRIN CS PATHWAY; (M174)PID UPA UPAR PATHWAY	(M5930)HALLMARK EPITHELIAL MESENCHYMAL TRANSITION; (M5909)HALLMARK MYOGENESIS	1.0	0.0	0.0	0.0	0.0	1.0	1.0	1.0	0.0	0.0	0.0	0.0	0.0	0.0	1.0	1.0	0.0	0.0	1.0	1.0
ITGBL1	9358	symbol	H. sapiens	9358	H. sapiens	ITGBL1	integrin subunit beta like 1	GO:0033627 cell adhesion mediated by integrin;GO:0007229 integrin-mediated signaling pathway;GO:0007160 cell-matrix adhesion						(M5953)HALLMARK KRAS SIGNALING UP	0.0	0.0	0.0	0.0	0.0	0.0	1.0	0.0	0.0	0.0	0.0	0.0	0.0	0.0	0.0	0.0	0.0	0.0	0.0	0.0
JAM3	83700	symbol	H. sapiens	83700	H. sapiens	JAM3	junctional adhesion molecule 3	GO:0090138 regulation of actin cytoskeleton organization by cell-cell adhesion;GO:0090022 regulation of neutrophil chemotaxis;GO:0002318 myeloid progenitor cell differentiation			Golgi apparatus(Enhanced)		(M169)PID INTEGRIN2 PATHWAY; (M159)PID AMB2 NEUTROPHILS PATHWAY	(M5951)HALLMARK SPERMATOGENESIS; (M5915)HALLMARK APICAL JUNCTION	1.0	1.0	0.0	1.0	0.0	1.0	1.0	0.0	0.0	1.0	0.0	0.0	0.0	1.0	1.0	0.0	0.0	0.0	0.0	0.0
KANK4	163782	symbol	H. sapiens	163782	H. sapiens	KANK4	KN motif and ankyrin repeat domains 4	GO:0030837 negative regulation of actin filament polymerization;GO:0032272 negative regulation of protein polymerization;GO:0030833 regulation of actin filament polymerization			Cytosol;Microtubules(Uncertain)				0.0	0.0	0.0	0.0	0.0	0.0	0.0	0.0	0.0	0.0	0.0	0.0	0.0	1.0	1.0	0.0	0.0	0.0	0.0	0.0
KATNAL1	84056	symbol	H. sapiens	84056	H. sapiens	KATNAL1	katanin catalytic subunit A1 like 1	GO:0051013 microtubule severing;GO:0031122 cytoplasmic microtubule organization;GO:0007283 spermatogenesis		Enzymes/ENZYME proteins/Hydrolases	Cytosol;Nucleoplasm(Uncertain)				0.0	0.0	0.0	0.0	0.0	0.0	0.0	0.0	0.0	0.0	0.0	0.0	0.0	0.0	1.0	0.0	0.0	0.0	0.0	0.0
KCND2	3751	symbol	H. sapiens	3751	H. sapiens	KCND2	potassium voltage-gated channel subfamily D member 2	GO:0045475 locomotor rhythm;GO:0061337 cardiac conduction;GO:0019228 neuronal action potential		Transporters/Transporter channels and pores;Voltage-gated ion channels/Voltage-Gated Potassium Channels		Disopyramide (Voltage-gated potassium channel activity);Amitriptyline (Voltage-gated potassium channel activity);Imipramine (Voltage-gated potassium channel activity);Dalfampridine (Voltage-gated potassium channel activity)			0.0	0.0	0.0	0.0	0.0	0.0	0.0	0.0	0.0	0.0	0.0	0.0	0.0	0.0	0.0	0.0	0.0	0.0	0.0	0.0
KCNE4	23704	symbol	H. sapiens	23704	H. sapiens	KCNE4	potassium voltage-gated channel subfamily E regulatory subunit 4	GO:1902260 negative regulation of delayed rectifier potassium channel activity;GO:1903817 negative regulation of voltage-gated potassium channel activity;GO:0098915 membrane repolarization during ventricular cardiac muscle cell action potential			Microtubules;Nuclear bodies(Approved)				0.0	0.0	0.0	0.0	0.0	0.0	0.0	0.0	0.0	0.0	0.0	0.0	0.0	0.0	1.0	0.0	0.0	0.0	0.0	0.0
KCNJ12	3768	symbol	H. sapiens	3768	H. sapiens	KCNJ12	potassium voltage-gated channel subfamily J member 12	GO:1990573 potassium ion import across plasma membrane;GO:0010107 potassium ion import;GO:0061337 cardiac conduction		Voltage-gated ion channels/Inwardly Rectifying Potassium Channels	Cytosol;Golgi apparatus;Nucleoplasm(Uncertain)	Dofetilide (Inward rectifier potassium channel activity)			0.0	0.0	0.0	0.0	0.0	0.0	0.0	0.0	0.0	0.0	0.0	0.0	0.0	0.0	0.0	0.0	0.0	0.0	0.0	0.0
KCNJ8	3764	symbol	H. sapiens	3764	H. sapiens	KCNJ8	potassium voltage-gated channel subfamily J member 8	GO:0098915 membrane repolarization during ventricular cardiac muscle cell action potential;GO:0086005 ventricular cardiac muscle cell action potential;GO:0086013 membrane repolarization during cardiac muscle cell action potential		Transporters/Transporter channels and pores;Voltage-gated ion channels/Inwardly Rectifying Potassium Channels		Phenformin (Inward rectifier potassium channel activity);Levosimendan (Inward rectifier potassium channel activity);Thiamylal (Inward rectifier potassium channel activity);Gliquidone (Inward rectifier potassium channel activity);Glisoxepide (Inward rectifier potassium channel activity)		(M5944)HALLMARK ANGIOGENESIS	0.0	0.0	0.0	0.0	0.0	0.0	0.0	0.0	0.0	0.0	0.0	0.0	0.0	0.0	1.0	0.0	1.0	0.0	0.0	0.0
KCNK13	56659	symbol	H. sapiens	56659	H. sapiens	KCNK13	potassium two pore domain channel subfamily K member 13	GO:0030322 stabilization of membrane potential;GO:0071805 potassium ion transmembrane transport;GO:0071804 cellular potassium ion transport		Voltage-gated ion channels/Two-P Potassium Channels	Cell Junctions;Nuclear speckles(Approved)				0.0	0.0	0.0	0.0	0.0	0.0	0.0	0.0	0.0	0.0	0.0	0.0	0.0	0.0	0.0	0.0	0.0	0.0	0.0	0.0
KCNN2	3781	symbol	H. sapiens	3781	H. sapiens	KCNN2	potassium calcium-activated channel subfamily N member 2	GO:0098914 membrane repolarization during atrial cardiac muscle cell action potential;GO:0086014 atrial cardiac muscle cell action potential;GO:0086026 atrial cardiac muscle cell to AV node cell signaling		Transporters/Transporter channels and pores;Voltage-gated ion channels/Calcium-Activated Potassium Channels	Cytosol;Nucleoplasm(Uncertain)	Miconazole (Small conductance calcium-activated potassium channel activity)			0.0	0.0	0.0	0.0	0.0	0.0	0.0	0.0	0.0	0.0	0.0	0.0	0.0	0.0	1.0	0.0	0.0	0.0	0.0	0.0
KCNN3	3782	symbol	H. sapiens	3782	H. sapiens	KCNN3	potassium calcium-activated channel subfamily N member 3	GO:0071805 potassium ion transmembrane transport;GO:0071804 cellular potassium ion transport;GO:0006813 potassium ion transport		Voltage-gated ion channels/Calcium-Activated Potassium Channels	Nucleoplasm(Approved)	Miconazole (Small conductance calcium-activated potassium channel activity)			0.0	0.0	0.0	0.0	0.0	0.0	0.0	0.0	0.0	0.0	0.0	0.0	0.0	0.0	0.0	0.0	0.0	0.0	0.0	0.0
KCNQ3	3786	symbol	H. sapiens	3786	H. sapiens	KCNQ3	potassium voltage-gated channel subfamily Q member 3	GO:0060081 membrane hyperpolarization;GO:0071805 potassium ion transmembrane transport;GO:0071804 cellular potassium ion transport		Transporters/Transporter channels and pores;Voltage-gated ion channels/Voltage-Gated Potassium Channels		Amitriptyline (Voltage-gated potassium channel activity);Diclofenac (Voltage-gated potassium channel activity);Meclofenamic acid (Voltage-gated potassium channel activity);Ezogabine (Voltage-gated potassium channel activity);ICA-105665 (Voltage-gated potassium channel activity)			0.0	0.0	0.0	0.0	0.0	0.0	0.0	0.0	0.0	0.0	0.0	0.0	0.0	0.0	0.0	0.0	0.0	0.0	0.0	0.0
KDELC1	79070	gene_synonym	H. sapiens	79070	H. sapiens	POGLUT2	protein O-glucosyltransferase 2	GO:0018242 protein O-linked glycosylation via serine;GO:0006493 protein O-linked glycosylation;GO:0006486 protein glycosylation			Nucleus(Supported)				0.0	0.0	0.0	0.0	0.0	0.0	0.0	0.0	0.0	0.0	0.0	0.0	0.0	0.0	0.0	0.0	0.0	0.0	0.0	0.0
KDELR3	11015	symbol	H. sapiens	11015	H. sapiens	KDELR3	KDEL endoplasmic reticulum protein retention receptor 3	GO:0006621 protein retention in ER lumen;GO:0035437 maintenance of protein localization in endoplasmic reticulum;GO:0036498 IRE1-mediated unfolded protein response			Endoplasmic reticulum(Enhanced)			(M5922)HALLMARK UNFOLDED PROTEIN RESPONSE; (M5937)HALLMARK GLYCOLYSIS; (M5891)HALLMARK HYPOXIA	0.0	0.0	0.0	0.0	0.0	0.0	0.0	0.0	0.0	0.0	0.0	0.0	0.0	0.0	0.0	0.0	0.0	0.0	0.0	0.0
KDR	3791	symbol	H. sapiens	3791	H. sapiens	KDR	kinase insert domain receptor	GO:0038033 positive regulation of endothelial cell chemotaxis by VEGF-activated vascular endothelial growth factor receptor signaling pathway;GO:0090050 positive regulation of cell migration involved in sprouting angiogenesis;GO:2001214 positive regulation of vasculogenesis	Tyr protein kinase family	CD markers;Enzymes/{ENZYME proteins/Transferases,Kinases/Tyr protein kinases};RAS pathway related proteins	Plasma membrane(Supported)	Sorafenib (Vascular endothelial growth factor-activated receptor activity);Sunitinib (Vascular endothelial growth factor-activated receptor activity);N-(4-{4-AMINO-6-[4-(METHYLOXY)PHENYL]FURO[2,3-D]PYRIMIDIN-5-YL}PHENYL)-N'-[2-FLUORO-5-(TRIFLUOROMETHYL)PHENYL]UREA (Vascular endothelial growth factor-activated receptor activity);AZD2171 (Vascular endothelial growth factor-activated receptor activi…	(M137)PID VEGF VEGFR PATHWAY; (M103)PID S1P S1P1 PATHWAY; (M44)PID HIF2PATHWAY		1.0	1.0	1.0	1.0	0.0	1.0	1.0	1.0	0.0	0.0	0.0	0.0	0.0	0.0	1.0	1.0	0.0	0.0	0.0	1.0
KIAA1462	57608	gene_synonym	H. sapiens	57608	H. sapiens	JCAD	junctional cadherin 5 associated	GO:1903589 positive regulation of blood vessel endothelial cell proliferation involved in sprouting angiogenesis;GO:0090050 positive regulation of cell migration involved in sprouting angiogenesis;GO:1900748 positive regulation of vascular endothelial growth factor signaling pathway			Cell Junctions;Vesicles(Supported)				0.0	1.0	0.0	1.0	0.0	0.0	0.0	1.0	0.0	0.0	0.0	0.0	0.0	0.0	0.0	0.0	0.0	0.0	1.0	0.0
KIAA1644	85352	gene_synonym	H. sapiens	85352	H. sapiens	SHISAL1	shisa like 1				Cytosol;Vesicles(Approved)				0.0	0.0	0.0	0.0	0.0	0.0	0.0	0.0	0.0	0.0	0.0	0.0	0.0	0.0	0.0	0.0	0.0	0.0	0.0	0.0
KIAA1755	85449	symbol	H. sapiens	85449	H. sapiens	KIAA1755	KIAA1755				Golgi apparatus;Nucleoli;Vesicles(Approved)				0.0	0.0	0.0	0.0	0.0	0.0	0.0	0.0	0.0	0.0	0.0	0.0	0.0	0.0	0.0	0.0	0.0	0.0	0.0	0.0
[truncated: 531 more rows]

## Sheet: Table S9
GroupID	Category	Term	Description	LogP	Log(q-value)	InTerm_InList	Genes	Symbols
[truncated: 285 more rows]
